# Supplementary material for: Neuronal Splicing Regulator RBFOX3 (NeuN) Regulates Adult Hippocampal Neurogenesis and Synaptogenesis
Source: PLoS One. 2016 Oct 4;11(10):e0164164. doi: 10.1371/journal.pone.0164164 (PMC5049801; doi:10.1371/journal.pone.0164164)
Supplement: S1 Table — (XLS) [file pone.0164164.s001.xls]

## Sheet: Affected genes
Gene	Gene Symbol	Exon	p-adjusted	log2fold(KO/WT)	Upstream TGCATG	Distance to Exon	Downstream TGCATG	Distance to Exon	Upstream 500 bp	Exon Sequence	Downstream 500 bp
ENSMUSG00000007617	Homer1	E014	1e-12	-0.607699			recognized	431	TTCCAATGCTATACCAAAAGTCCCCCTTACCCACCCACCCCCACTCCCCTACCCACCCAGAGTGCTGGGACTCCCTGCAGTTACCACCTTTATTCTGTTTAGTTACCTTTATTAACCCATCAGGTTTTTGAAATTATATTTCTAAATTGTTATCTTTACAATTCATTATATTTTCATTAATTTCCTTATGAATTGATTTCCTGCCAAAATAATTGTCTTTTTTTTAATTTAATTAAAATTTCAACTGCCATTTGA	TACACATTCAATTCAGCAATCATGATTAAGTAAGGTGGATAAATATGGAAGTTCATTTGGTTTCAGAAACTCTTGAAGTTACAACCTTTGAGTGAAAAATCTCAGGTCAGACTCCTTTAATTTATTGTTCTTGGTTGCTCAAGTTGACTGAATTACTATATTTCCATTATCTATGTGGAAAAAGGAGCATTGAGCTAATTATAGGAGAAATTTTTTAAATGGAGAAAATATAATTCCTTTCTATCTATATTTTAA	TTTTCTAGTATATTGATTTTTGCTGTATAACAGTATAATAATAAACACGGGTTGATTCACCCCATTTATATTTCTTTTTCTAAGCTTCAGAAAGGCAATAATTTGAAATTATATCTAGAGGTTTTGTACAATTTTTAAAATTAAATTTCCTTGGATACTTTAGGCAATATTTTAACCATTTTTTAAAAAATATTTATATTTAAGTAAGGCAAAGTACAGCAAAATGTACTTTTTATAAATTAAATACAGCTTATA
ENSMUSG00000007617	Homer1	E025	1e-12	0.222942					CATGGCGTGAAACAGGAGCAGCGGTTTGCTATTGATGAGAGGTCAGGTGTATCATAACCAAGCCGTGGCTTTCTGAGATGGCTGAATACAAATCTCCTTAAATTGTATGAAGTTGAATGTCAGAGGCACAGCCTGATTGTCAGACTTACAGGAGGACACTAGGAATGGTAGGAATGCATTGTCGTCTGAAGGATGAACTGACATGTATGTGTGTTATACTTTTCTTTCTGAAGGAAGTTGAAATTCGAAATAAAG	TGCACAAAATTTTTTGAATATCATTCCTCCAGGAGGAGGGTGTTTTGAAAATTGGAATTGTATATTTCAGTATAAATTTTAGAATTTAGCTTATAGCTAGTTGGGGAAAAAAAAAGACATGAAAAACTTGAACTACAAATTACCTCCATGTATATTGGCCATAGTTAACTGGAAAGTTATAAGTAGACACTTTAATGCAATCTTTTCCCCCTGATATTAGCCAATGGGAGAATTAACAATGTCTGGGTCCCTTCT	CCCATCTTTCTCACTCAAACAGATTCTTTAGTATGTTTTATATTTATGTGTATGTATGTCAATACATACATACTAATTTATATTAGAATGAAAATAAATCGTTTGTTTCTAAAGGTAGTTTCTACAGTAAGGTGTCTCTGACACATGTGTATCAGACACTGGACCACCATGTATTCTCTGTGCTATTCCATCCTGCCTGTCACCTCCATCAACCTTAGGGTATTTCCCTCACCTGTCTATTATAGAAGGAATCTT
ENSMUSG00000015222	Map2	E067	1e-12	-0.161079					ACTTTTGTGGGGATACACATACGCTGATCTAGAAATGAAAGGTGCACTACTGCATTTCTAGATCCACTAATGCCAGTTTCTCTCTGGCTTTAGCCTTTGAGAACCTGTTTAAGAATACGTAAGTATCCAGAGCTCGGAAGAGTTCCAAGGCCCACTTTTTCAATAAACTCACACACTCTGGGTCTCCTGCAACTGACAATTGGGTACCTTGCAACAATGCAGGAAGGATCCGAGTCTATGATGAGTTTCAAAGGC	AAGAAATGATATAAAAGCAAATAATTCTGACTTAGCCTCATTTATAGCTTTCCTCTCATATTTCATGCCACATGGGGGAAAAAAGGAAATGATTGTGGTAGAAGTAGCAAAGTAAAAGTAGATTAATCATTTGGAAAAGGCAAATTTCAGGCATTTCTCCAAGATTGATGTGCTAAAATTAATACTTATGTTTGTGTTTTTACACCTAGAAGTTTTAGCCTGGACATGTAGATTGAGGCCAAGTCCCTCTGTAGG	AACTACAAGTTTCAGATTTTTTAAAAACATTGTTTCTTCATCTCTGGAGGGGAAAATAGGTGTGTGTGTGTGTGTGTGTGTGTGTGTGTGTGTGTGTGTGTGTGTGTGTGTGTGTGTGTGTGATATGTATATGTACATACAAATCATTTGATCCAATCAAAGAAAAACTGAGGTTAAAAGGCCACAATTACCTATCAATTTCTTATTTGTGATTGTTCCCTATAGAAGGCAATTCTATATTACCCAATCTACTTG
ENSMUSG00000024109	Nrxn1	E001	1e-12	-0.0989178	recognized	221			ATTAATAACTATGAAAGTATGTCGCATTAATGTTGAAACTCATTGCTATAGAAATGGAAGAAAAATGTCTCAGATTTTATTACTGGAAAGTTGTTTCAAATGATCCAAAGTATTAAAATAATTACCAGCTGTTGGATTGAAAGTTACTGATGGTCATATGGTTGCCAACAACAAAACTTTGTTTTATGAAAACTGAGCATAACCTTTTTCATAGAAATTGTATATCTATTTGTAAGTCAGAATTTGGTAAAGATT	GTTAATTACAGGTGTATTTAACTTTAATCCCATTGTAACTTACAGAGAGTGTATTTATGACATCAGCATATATTCGTATTATTCTCTGCTAGTTCTGTAATTTTCCATGAAAGCTACATGGAGTGCCTGCATCTTAAGTGTACAAGCAGAGGGACTGATTAAGTAGTAAAATGCTGAAAGGGGTGTGACAGCATCTTTTCCTGTGTGTGTCTGGGGATAAGATCTCCTTTCAAATGCATTCTTCTTCATTGTTAT	CTCTCTTTCTTTCTTTTTTTTTTTTGTGTATGTTTTTTTTTTCTTTTGAGAAACAAGAGCATGAGATACTTGTTTGTTTTTTTTTTTAAAAAGAGTTTTCCCTCCTGATCGCATTCCCTGTCTTCTTTTGTATGTGCTTCATAAAAAGGAAAGTAAAAGTTTATATTATGTCTCAGATAAAATGAAGACTATTTCTATACAAGTGTCCGTTTCAAATCTTGATATCAGACGTAATACTCCTTATCCTTGTTTTTC
ENSMUSG00000027273	Snap25	E008	1e-12	0.509107					GGTTGGAGATACTTAAAAACCAAAAGATACTGTTACTTTGAAATTGAAGCAGATATTCTGTCTAGACACATTGAATGGGAACCCCTTAAACATAAATTAACACCTGGTTTTTCTTTCTCTTGGGTTTCACTGGTATCTGAATCAATACGCTGTGCTGTTTCCTGGGATGTGCAAAATCAAACAGACCTTCTGATCCCATCTCATCCCGTCTGAACTGCAAACTATTTTGAGTATCGTTCTTGTTCATTTCCTTCC	ACAACTCGATCGTGTCGAAGAAGGCATGAACCATATCAACCAAGACATGAAGGAGGCCGAGAAAAATTTAAAAGATTTAGGCAAATGCTGTGGCCTTTTCATATGTCCTTGTAACAA	GTAGGTACTGGGTACCAGCTCTAATCTGTGGCGTCCAGTTTTCTTCCTTTCTTTCTTTTTCTTTCTTCCTTCCTTCCTTTTTTTTTTTGTTTTTCTTTTTTAATGTCAAAGTGAATGTCTGAAGTTTTGTCTTTTTTTTCTTTGTCCTTTTCCATCTGCTTCATTCTGTGGGGATAAAATACTTGTGTTTAATCAGAACAACTGGAACGCATTGAGGAAGGGATGGACCAAATCAATAAGGACATGAAAGAAGCA
ENSMUSG00000029657	Hsph1	E011	1e-12	0.87927					TCACACTCTTACATTTAAATAATGAGGACTTTTTATTATACTTCTAAATTCAGTGCGCATCTCAGGAACAGTGGACCTTGATTGCCCTCAGTCTCTTGATTGTGTGTGGCCTGCTTCCCACAGTGCCTGTGCAAGGAATCACTTCAGAGGAACACAACAATTCTCAGCCACACACAACATAACTCCCTATACAGATCTCACATACAAAGCCCAGCCAACTCCACTGAATTAAGCAGACAGATCCATCCTTTTGCC	TTAAGGGTTAAGAAAAAGAAATTATCTTAATGTTTAGAAAACAAAAACCTACCATATTTACTGATGATCTCTCTTTACTCTCGGACTCTCACTCTGATGCTGGAACTATCAGTGTCTACACCCACCTTGGACCTTGGACTACGGCAGTAACTCAGTGTGTCGTCTTTTTGCATCAGCTCACCATCATCTTCTCTAGTCACATTAATCTTTGGTCTTTTCCAAATCCCTTTAAACTCAAAACTAACTTATCTGCTT	TTTGTCAGCATCTGGGGTTTTGCTTTCTTCTGAGGTAAGTTCAGGTGAAGGGGGAGACTGTGAGGTTTGTTGACCATCAGTTTGTACCTGGGGCTGTGTTCCAGCTTCACTGTTGTCTTGCTGGATATTTTTCTGAAATGAAAGCCCAGGCACAAAGGATGTAGAAAGCAGGTGTACTTGTATGAATTTCAAATTATAGGGCACCAAAGACAGTACTCTCAATTTCCAAAATCTTAATAGGTGGGCAGAAAAGAA
ENSMUSG00000032589	Bsn	E001	1e-12	-0.126283					CTTATTTTCTAGTGCTGCTTAACTTATATTTGTTTAGTTTCTCTACGTAGTTCTGGCCTCAAACTCACAGAGACCCACCTATCTCTGTCTCCCAAGAGCTGGGATTAAATGTGTGGGCTATGATATCCAGCTTGAACTATTCTTGACTATACTAAGGATTAAAGTCTCAGCCATGGGGGACTGGGGGGGGGGGGGGAGTTTCGAACAAGGTAGGCAGATGTAAAGCTTGTTTGATAGCACCAGGGGGCAGCACTT	AAGGTTGTTTATATCAAGTCCTTTTATTCTGATACCACAGAAATACCTTGTCACAGTACAGGGGAGGGACACTGAAGTACCACGAGTTCTCACAGAGCACAGGAGGACGGCACACAATTCACAAGGTCATGTGGAGGACTCGGGTCATTGCACTTACAATGTAAACTTGTTTGTTTGACTTTGTACAGCACTCTCCCCCCTCACAGAGAGAAGGAGAGAGAGGGGAGGAGGAGGGGAGGGAAAGCAAAAACAAGA	CTTTGAAAAGAGAAGGAGAGAGGGAGAGAAGGAAGAAGGGTTTGTTGTTGTGAACCCTGGTCATAGTTTGCCACCCTCCTTACATTGCTCCTAGGCACTGCCATGTGATGGCCAGTTTCTGCTTCACCCAGAAGATTGCATTCCGTCAAGGCATAGAGAGGTTAGCATCTGCGCAGGTTAAAGACTGATCGGGAGAAGGGAGAGCCAGACCTCCAGGAAAAGACCTCCCTTCTTCCTGTGCCATTTGAGACAGCA
ENSMUSG00000036052	Dnajb5	E011	1e-12	0.439499					TCTCAGGCCCTCACTATCACACCTGTCACAGGTACACACGCTGCCACTCAACAACTACACACTGTCACTGCCAGCCTCACTGTCACACAGCCGAACAGGCGCTCACATCATTCAGCCAGACACTGCTGCACCTGAGAGCAGGTGGCCACTGGATCCTCTCTCTGCACTCTACACCTGGGGACCGGGTCCAGCTCCCTGGGCACGATACAGGCCTTGCTGGGTCACGGCCTCTGGGAATCTGAGGAGGTGGCTTCC	TAAGTCCCTCCTGAGAAGGGCGCTCATACCCATGCCAAGTCAGATTCTCCACATCAGCCATTCCCTGCATTGCCTCCTTCCTTCCTCCCTGTCATCCTCATCTCCCCCCGGTATGTGCATGAGTCCCCTTGACCTCACCTGTACTTTTGAATGAATTGTACCCCATGTCATTCATCTCTCTCTCAAACTCATGTTTCCACGAATATCTCCAATATTTCAGCTCTTAGGTTCTCCCTCCCAACCCATCAGTAACGT	GGGCTGTAGAGAGTAGGGCATCAAAGACTGGCCCTGGGCTCTTTCAGGAACAAGGAGCCCAGCACCGGTCCAGTGGCTGTGATGGGAAAAGATTATTACAAGATTCTTGGGATCCCGTCTGGGGCCAATGAGGATGAGATCAAGAAGGCCTATCGGAAGATGGCCTTGAAGTACCACCCAGACAAGAACAAAGAGCCCAACGCCGAGGAGAAGTTTAAGGAGATTGCTGAGGCCTACGATGTGCTGAGTGACCCT
ENSMUSG00000052727	Map1b	E001	1e-12	-0.0735844			recognized	280	TTTTTGGTTTTTTTTTGGTTTTTTTTTGGTTTTTTTTTTTGGTTTTTTTTTTTTTTTTGTTTTTTCGAGACGGGGTTTCTCTGTTTAGCCCTGATGGTCCTGGCACTCACTCTGTGGACCAGGCTGACCTTGAATTTAGAAATCTGCCTGCCTCTGCCTCCCAAGTGCTGGGATTAAAGGCGTGAGCCACCACCACCACCTGGCAGTGACCTGGGTCACTGCTGGGATGGGTGCCTCCCAGGGTGTGGTCCACCA	GAACTTTTGCCACTTTGTATTTTATTGTGGAACTGAGTTTCTGTTGTTTGTTTGTTTGTTTTTCCTTTACATCAAATATCCTTGATAGAAGAGGGGATATTGCACACAAATATCATAAAAGCACTACATATTACTTTCACTGGAAACTAATTTTTCTACATTAGATATGACTGGATAGGATGGAAGTGATGCAGGATTATAAGACATAATACCATACACAGCTGCAGACCGACACAAACACCATTCATAACAAGA	CTACGGAGGGGGAGAAAAGGAGATATTTAAAGGACAGCAGGGATAGATGCCAGAGTAAAAACAGAACAAGGTGTCTGTTGGATCACTAGCAGAAAGGGATAAAAGGAAAAAAAATGCCGTTTTACCAGAAAAATACCAATGAAGTTTTCAACTGATGTTTTCCAAGAACCACAACCAAGCTGTAAAAATTAGAAGGTTTTTTTTTTTAATTTAAAAAAAATTTTTTGGGATGTCATTGAAGGGAAGAGTTCAAGC
ENSMUSG00000052727	Map1b	E003	1e-12	0.0802696					GTAAGAAAACACGGCAGATGTTTCAATGGGCACATATATTGCCTACATGTTAGGATTTTTTCCCCAAAGGTGTACATTTTTATAATTTTACATTTTAAATTTTACAGAAGAAATAAATATCGGGCTTAGACAAAATTCCAGGTTTGCCAGGGAAACCTTTGGTCTGCCATACGCCTTTGGGAGTTCCTGATCTGTCACCCTGATGTGATTTTTAAGGTCAGCCTGCCTGAAGCCTCCCTGAGCAGCCCGAGACAC	TGCCGTTGCGGTCTTCGCTGATTTGGATGCAGAGGCGTTAGCTGCGTTCTTGGTCTCCTTGTCCTTCTCTTCTCCGCGTGTGGCTTTGACCTCAGGAGTGGTGGTGGTCTTTGTAGCTTTTTCCACGGATTCTTTCTTCTTGGGAGAAGCCACTCTGGACACCTTGTCGGAGGATTCCTTCAAAGCTCCTGGTTTGGGGGAAGCTGCTAAAGGCTTGGACTTCCCATCACCCTTTTTGACAGGTGAAGAGGACTT	CTGGGTTTGCAAACAGAGAAAGGGGGGAAAGTGTCAGTGATGTCACCCCTGGCTTATCATCTCCATCATTGCTAGTTATTATAGGATCACTGACTTTACGTAGGACTTGGCCCCAGCACTTGGGAGGCAAATGCCAGTGGTTTTTTCTGAGTTTGAGGCCAGCCTGGTCTACAAAGCAAGTTCTAGGACAGCCAGGTCTACACAGAGAAATCCAGTCTTCAAAAAACAAACAAAAAACAAAAACAAACAAAAACC
ENSMUSG00000052889	Prkcb	E025	1e-12	-0.164162					CTCTCTCTCTCTCTCTCTCTCTCTCTCTCTCTCTCTCTCTCTCTTCTCTCTCTCTCTCTCCTCCCCCAACAAAGTCAGCTCCTGGCCACAGGGGTCGCCATTGAGTTGTTTTCTTCCAGGATACTCTATCTAAGAGCCAAGTCTATGGCATTAGCTGTGAGAAGTAGTTACCACTGTAATTCACCTCAAAGTCGAAGCATAGGACTCCCCCCCACACAAACACACATTTCTTTAGGGCAATTCTTAAAAAAAAAA	GAGACAAGCGAGACACCTCCAACTTCGACAAAGAGTTCACCAGGCAGCCTGTGGAACTGACTCCCACTGACAAACTCTTCATCATGAACTTGGACCAAAATGAGTTTGCTGGCTTCTCGTATACTAACCCAGAGTTTGTCATTAATGTGTAGGTGAATGCAGAGTCCATTGCCGAGCCTGTGTGTAAGGCTTCAGGCCGAATGTCTGTTACCAATTCCAGTCTTCCAGGATTCATGGTGCCTCTATTGGCATCCG	AAACCCTCTTGTGTACATGTCTGTTTTTAAACATGCTACATTACAGATGGAGGGAACACAAAGTGACACTGCCATATGACAAGTGCCCTTCACTAATGTTGATTTCCTTTGCATTGAAATCATTACACACGTTTAAAATGGAACATCTCATATTAATTTAGTGGACTTTCAGATTTGGGGGAGGTGAAAAGAAATCAGAAAATTGGCGACAATTGGGCTTATCTTTCCATGTGGAAATAGCTATTTTTTAACTTC
ENSMUSG00000054280+ENSMUSG00000023452+ENSMUSG00000093574	Prr14l,Pisd,Gm20671	E006	1e-12	-0.566362			recognized	472	CTCAGGGCAAAGGCCTAACTAATCAACACTCCCAGTATCAGCTGTGACTTTGACAAGGCGGGGCAGGGGTCAGACATAAATGCTGAAAGGTTAGCGCCAGCAGCAACCATTAACACCTAAAAAGGCAGAGTGGGTACCAGATTTTCTCACCCAAGCCAACTCTACCCTCCTGCAGGCTCCATCCTTGCCTCTGATCAGGGCTCCTGGCAGAAGCAGTGTGATAGGATGTGGGATTGGTTCAGGCAGGTGAATGGC	TGTCAACGAGAAGAACCCATGTTTCCAGTCTCCAGTTAGGACTACACGCTCATTGTGACAAAAGAGCTCTTTGATCCATCGGGCCATGCCAGGGTTCACTGACATCAGGGAAC	CTGAAGAGACAAGAGAATATGCTACTTTCTGCTCAGAGCCTGACATGTTCACATCAGAATGGCCAAAGAGCCACAGGGACTCACAGGCCAAGCGTTCCAAATTCTAAGCAGGACCCCAGATACCCTTGCCTATAGTCAGCCACCTCAAGAAGTCCTCTCCTGGCCTTGACGACACCAGCCTCAAGCCCAGTCCTCCCAAGTCAAAAGGCCCAGGGCCTCTAATGCCCACCCCTGGGCAGACCTGGGAAGTGGCGC
ENSMUSG00000074505	Fat3	E001	1e-12	-0.163251			recognized	445	CCTTCACTTTATGCAGAAACATTTTTGTAGACTTAAATGACTCAGGTATCAGTTATGATTCAAGCTTTTGAAAAGAAGTTGTTTGAGAGAGAGAGAGAGAGAGAGAGAGAGAGAGAGAGAAAGTGGAGCCCTGTTTGGAAACCTGGGATTGTGTTCAGTGATTTCAGCTGAGGTGGAAATCTGTGATCTGTGACCTTTGCACCATTGAGCTCCAGCACTCTGTTTCATGCTTCTTATCAAGCAAGGGCCCACAGA	CTTTTACTTGAAAACTTGTTTTCATGATCAAATTTGGCAGTTACAAACCTGTATACTGTTGGTTCCCGCCCTCCCCCCCCCCCTTCCTTTAGTTTTTGGCTAAAATTTTTTGTGTCTTTTTATTTCATTTTGTTTTTATTCCATTTCTTTTCTGCTTTCTTTTTTCTTTTTCTTTTTCTTTTTTTTAAGAAAAGAACACAAGACTGAATAGTGCCAACAGCAATATCTGTAGAAATAATGCATTTATATAAGGGG	CTGTAAGGGGAAAATCCAGATGATTAACTTTCTCTAGACTAGAGGAAGGGCAAAGACGTATGAAGAGCAGTATGAGTCTGCCATGCATTACTAAAGACCAGAAGACCCTAAAAGCCGAAGTCATATGCTAGCTCACTACAGTGGCCCATTAGGGCCAGCCATGTTTTGGCCTGGAGAGAGAGCATGGAGAAAGAATGCCTGGTTGGTGCAGACTCATACTCACTAGGCCCAGAGATGTGGCCCCCGAAGGCATGC
ENSMUSG00000075318	Scn2a1	E033	1e-12	-0.0991512					AATTTTTTAAGTTTTTTTTTCTTTTTTATTATCTTTTTATTAGATATTTTCTTTTTTTTCCATTTTTTATTAGGTATTTAGCTCATTTACATTTCCAATGCTATACCAAAAGTCCCCCATACCCACCCTCTGATGGTCTTAAGTGACCCCTATGAAAGGGTTGTTCAACCCCCAAGGGTTTGCAGTTCACAGATTGAGATTGAAAATAAAAAACCTCAATAGTATAACACCAAATATACCAATGTCATTTTAGTG	GATGTTTCTCGCGGAGCTGATAGAGAAGTATTTCGTGTCCCCTACCCTGTTCCGAGTCATCCGCCTGGCCAGGATTGGACGAATCCTACGCCTGATCAAAGGCGCCAAGGGGATCCGCACGCTGCTCTTTGCTCTGATGATGTCCCTTCCTGCGCTGTTTAACATCGGCCTCCTGCTTTTCCTGGTCATGTTCATCTACGCCATCTTTGGGATGTCCAACTTTGCCTACGTTAAGAGGGAAGTTGGGATTGATGA	TTTTAAGTTGTGCATTCTTTCTTCTCTCCTCTGCCTGTTGTTTGGTTTTTCGCTTTCACTTCAGTCCTTACACAGTCACAGTCAACTGTCCTATGCTCTTTTTTACCCCTCTATCAGACACTGGCAGGTTTTCAGAAGACTATTTACCTCGATTCTTTTCCATTCACCAAAATCTTGGTCAGCTAAGTACACATGGGCCACTAATGCCATTCTGCCACTTTGAAGATGGCACATTCTATCTGTAAATTATATATA
ENSMUSG00000015222	Map2	E066	1.14e-12	-0.0851214					AAGAGCATGTAAGAAACACATTTTTTAAAGTGTTATTTTGTATAAATGGGAAGAAAGACGCAATTAAGTTATTGACACTTGGGACCTGGACGAGTATATCAGAGTATGCCATTCCAATAAATTATTGAACTACAAGCTAGATTTAAGGCATTTGAGCGTTGGTTGAAGAAGTGGTGTCAAAGTGCATCTCTTAGGATTGATGCACTTTTGTTAGGATGGGCTTGTGTCTGATTAGAATGTCAGTCGATTGGCTAG	GAGTTTTAGCATGAAGTTGCTTTCTGTAACAACTCAAAGCTGTAACCCTGTCTTAGTGCCAGAATCAAGTCTTTCCTGTGATGCTAGAACATTTTACTTTTCTTTGCTTCCACCAACATGGAGTTTGTGGAGTGGGTCCAGTTATGCATAAAGGGGTTTACAGATGTTGGTTCAAGGATTATGGATTTATCTCATGTATAATCACTAAATAGGTCGGGTTTTATCCCTCTAATTATCCATGACACCAATCTCTTA	AAAGAAATGATATAAAAGCAAATAATTCTGACTTAGCCTCATTTATAGCTTTCCTCTCATATTTCATGCCACATGGGGGAAAAAAGGAAATGATTGTGGTAGAAGTAGCAAAGTAAAAGTAGATTAATCATTTGGAAAAGGCAAATTTCAGGCATTTCTCCAAGATTGATGTGCTAAAATTAATACTTATGTTTGTGTTTTTACACCTAGAAGTTTTAGCCTGGACATGTAGATTGAGGCCAAGTCCCTCTGTAG
ENSMUSG00000063077	Kif1b	E001	1.14e-12	-0.111412					AACCACATGGTGGCTCACAACCATCCGTAATGAAATCTGACTCTCTCTTCTGGAGTGTCTGAAGACAGCTACAGTGTACTTACATATAATAAATAAACAAACAAACAAACAAACAAATAAATATTTTTTTAAAAAAAGAATATTTTTCCCCCCCCAAGACAGGGTTTCTCTGTGTAGCCCAGGCTGTCCTGGAACTCACTCTGTAGACCAGGCTGGCCTCGAACTCAGAAATCCGCCTGCCTCTGCCTCCCAAGT	GTGATGCACTGGTTGTACCTTTATTATTTTTACCTCGTTCACTAGCAGTTCTGTGATGCAAGGTTACCATACACAGTTAGATAATGTCTGCATTACACATCTAGGGCTATACAGCAAAAGAATCAGGATTAGTACAAATACAAGAACTGTATTTACATTTTGTATACTCAAGCTCCAAACATTAGATATTTACAAAATAAAACATGAAAATGAAATCCAAAATTAATAATGTACATTGTTGCTTGTGCTCAACTC	GTTTGTTTGTTTGTTTGTTTAAAGGAGTGCTTTGAAAATTTAAAAAAAAATCTTAAAAATACTTATTTTAAAGATTAGTTCTCTTAACTTTCCTGCTACTATGGCAATCACAAAAATCTCATGAACAGGTCCTGCCATAAAACCCTTTCTCTTTCAGAGCTTCGGAGCAGGTGACCTTGTCTGGAAACAGAATATAAAGCCCCCAAATGCTCCGATTCTGACCTGATCCTGGGCTTTACAGTAGGAGGGGTCCCA
ENSMUSG00000030465	Psd3	E002	3.23e-12	-0.0568018			recognized	293	AGCCTGAACGCTCACTAATTTGGCTAGACTGGCTAATCAGTGAACTCTGCAGATGTGCCTACCTCTGCCTCCTCAATGCTTGGGTTGCACATGTGTCCTGCTATACTTGGCTGTGTGTGTATATATGGAGACACATGTGCCTTTGTCCACACATAGACGTCAGAGGTGGATGTTAAATACTCTGCTTGATTTCTCTCTATCTCATTTTCTTGAGACAAAGTCTCTCACTAAACAGATTTAGGCTGGTAGCCAAGA	AAATTTGTTGTATTTATTTCTTTCTAAAGTTTATACATTTACATATACCATTTTATAATCCTTCACTGTTTGCATGATTTCTATTACATAAAAACCATTTCAAATGCAATAAATTTTGTTGTCGTAAAACAACAAAATGCCCTCAACTTATAAAAATCCAGGGACGGTTATATTCATGACCATTTACACAATAGAGAAAGATACTTGTCTACATCACATCTTCTATACATATCCGCTGGCCCACTTGTCTTCAAG	GTGGTATTCATTTCCAACATTGTTTTGTTTCAACCAGGACATGATCTATGCCTGTACATCTATGTTAAATGAATCTATTCCTGGATGGAAAGGTATCAATCACAGAGATGATTTTGATTCCTAGTCTAGATTCCATGGGAGTGAGGTAACATTTCTATAGAAGACCATACATCCTACTGCTACAGTTCCAAAGAGCTGATTACTGCCACCAGCCTTTAGAAAACAAAAGTGGCTCGGGATCAAGCCATCCTCAGG
ENSMUSG00000078789+ENSMUSG00000038268	Dph1,Ovca2	E001	5.08e-12	0.26964	recognized	179			TCATTGTCTGGTATAGTTAATTCTCAATAAATGTTATTTCTACCTCTGGACCTTATCCGCCTGGGCTGTACATAAATGTTAGAGCATTGATTCCTCGGGGGGAGGGGGCTTCTTTTTCTCCCCAGAGGGTTTTGAGTCCCACTAGAGGCTCTTTCCTAATACCACATATTTACCAGAGACTTAAAATTCTACCCAAGACTGTAGTTTGCAAATAGCTACATCAGGAATGACCAGGGGCAGACAAATAGGTCTATA	CACATGAACCTTTGCCTTTATTTATAGGGCTACCAAGTACAGGTCATCCTGTCCCCCAGCTTGGAGCTGACACAGGGGGCTGCCTATGACTGCCAGTGGTCTGAGTACTAACTTGCAAACCCACCAATTAGTTACAGAAAAGCAAATAGACCAAAGGGTTTATAAAATTCCACGTGTTCAATCTCCTTTTGTCAAGGAAGCAATCACTGTAAGGCAAGAACAAGGCACAGAGACCAATCCCCCACCCAAGCTGTT	TCCTTGGGTTTGGTTTGGTGCTGCCCCAGGATCGGGGCAGCAGGAGAAAGGCATTCAACATCTAAAGCATCGCTTTATTGTCTGTCAGTCACAGGGGTGCCAGCCCCTGCCTGCCCACCCCTGTCTTCTCACAGGCTCTCTGGGCTTATGTGTGTCCTGAGAACTGACAGTTGTCTTAACTAGCCATGGTGAGGAGACAGGGGAGAGCTGCTGGACAAAGTGGGAGCAGTGCGGAGACATTTGTCCATCCTTCAT
ENSMUSG00000032827	Ppp1r9a	E046	1.93e-11	-0.177452	recognized	252			ACACACACACACACACACACACACACACACACACGCACACTGCCTCCTGGAAGGTTGGCTCCCTACGACTCTGGTCTGTAAGCACCTGGGTCTGGATCCTCCGAGTAGGGGGCAGAAGAAGGTCCATGCTTCCCTGCCGCTGCCCAACCCCACCCCACCCCACCCCCCGACCGTTAGGGATCCAGCGATGTGCAAGACAGTGTACAAGCAGTAAGAGAAGAAGCCACAAATTCTCAGTTCTGTGCATGCCACTTG	GTTTATATATTTTGGTAAAATTGATTTACTAGATCTTTAGTATTGTATTTTAGTAAGGTAAATTTTCCTCAGATATTTGATTAATGCTTTGATGTCAAGATTGCACATTTTTTAGTTAGAACTCAGAAGCTATTATGCAGCTTGGGGCATTTTCAACTGCAGGATGCCCGCAGTTTTCTTGACTAAATTGCACTGTGTGTTCTCGTGTATCAGCTCCCACCTCAGTAGCCATGATGCTTCTGTCACTAACTGCTG	TCTCGGAGTCCATGTTTCTTTTCTCTCTCTTTCTTTTTTTTTCTCTTCCATTTCTACCTTCAACTAAAACAAGCCCTGACTGGGTAAACCTGCACTGACTGTCAAAACATCTCTCTCCATCAAGAGCAAAGTGCACATTTTTCATGGAAATGAAACTAAAAATAAGTTCTAACTCTGGCAAAGTGTAAATTGGCAGCTAGAATTACACTTGAAAGCACAATTATGGAACTGGGCATGAAGCTAAAGAGCTGAGCC
ENSMUSG00000076432	Ywhaq	E004	2.38e-11	0.186012	recognized	164			AGTGCCAGGCACCTTAGACAAGTGTACCACAATGCAGAAATATGGGTATCACCACTACATGTTACATAAAGAGAAACAGCAAAAGCCTTCAAAAAGTAGTAAATTCTGTTCCTTAAAATATGGGTATGCAATTGTTACAAAGCCATAATAAATGGTTTTATAAAATGTAGTTTTATTTTTATGTTACTCTGCTGTTACATAGGGCATAACATTTCCACGAGGCTTTTTTGGGACTACAGTCAATGATTAGCAAAC	GAGGTGTAAGTGAATTTTTATTGGGAAGGAAGTTGTCAACTTAAACAGCAGCAAATGAAGAATGCATAAGGAAACTCCCTGTTGTCACAGAAAGATGTAACCTCCAGAATATGTGACACAGGAGACATTTCGATCTGTGACCCCAAGCCCGGATGCATTAAGCGCTTTCCCATTCAATCTAACACTTCTGGATTCCTACTAAAAAGGAATTTGTAGTAAGAGCATGGAAAAGTTGCTTCTGAAAGGAAACCTCCA	CTACAAAAGAAGAAAAAGAGAACTATGTTAACTTATTACTTCCATCCAAGCATGAAGTCCCTTAAAACACCAATCCTTTAAGCAAGATGATGATGAAGACTGTCCTTTCTCAAACTGAGAACTATCTATCACCCCTTTAAAACATAGCCTAACAGACATTTACAATGTCACATTAACTACATATATTCATACATGTGTTCTGTGGACAGTATCTATCATTCATCTACAGGTTCCTCCTGGAGGTCCTGCTCTGAC
ENSMUSG00000022914	Brwd1	E060	3.92e-11	-0.329038					TCCTCGGTGTATCTCCACTAGGAAATAAAAACAACAACATGGTTAAGGGGCCGACATGTACAAACTAAAAAGATCCCCAAACAGTCTCTGGAGCGTAAGCACATCTACTTGAGAAGCCGAAGGCCTCTCCGTGCCGATTCTACTGTAGTGACAGGGCCACTACGGCCTTTTTCAGTTACTTTTCATTATCTTAGGTCGACAAGGAACTGACATTTGGTATGTTATCACTACTGCAGTAGCGTTCTACCAGCCCTT	ATATTTAATAAACTCTTTATTCAAGTTTTACCAACTAGTATACTAATTTACAACAGAAAAGCCTGGGAGGTTTATTATACTATTTCTGAGGGGAACTTAAAACATCTCAGATACAGCAGTAACACAGCACAGCACTTTACAATCCACCAAGTGTTTTCCACATACATCAGCTCATGGAGTCCTCACAACAACCCTGTGAGGTAGGTGTTTCTGCTAATTACAAATGAGGTAACTGAGGCTCACAGGTTCCAGGAC	CTTTTGCTGTTCGTAGCAAAGACTGCCTTCCTGCACCAAGCAAAGAAGTGACTCTTGAGATACTGGGCGGGACCTCCTTATCCAGCATCGGACCGATGCGCTGGCATATCTGTAGTAGGTGGTCAGGAGCCACATGTTTATTGGACAAGACCTGGTTGGAGAGGTAAGTTTTAATAACACTGCATACAACAGGACTCAAACATTTTTTTTTTAGGATAGCCAGTTAAAATGTGAAAATCACACTGAAAACTATAA
ENSMUSG00000066392	Nrxn3	E005	5.49e-11	0.46824					TATATTTTAAAGAAGTTTCCCTGATATTTGGTTAAAGACTGTGGCCTTTTTGTCTAGTAATACACTTTCCATGATTTTTATGCATATTTCTTTCTAAAGTTTAAGGTCTTAGACCTCTTATACTTAAGTAATGGATGGTAAAGTTGAAAAAGAAAAAAATGTTTTAATAGATAAGCAAGCAAAGATTATATATGGGTGTTTGAATGCTTTAAAATGTTGATGTTTCACATCTGGCTATTTCCAAAAATGTGCTGA	TCTTTTCTCTGGAGTCCTGGGAGCTCTGTTATGGGCAGCACTGCCTCTGGCCAGCACCATGAAGTCTGAATCTGCTTCCGCTCTGCTCTGGGCCTCACTCCACCTGAGTCCTCAGTTGTTTGCGGTTCCCCTTCCCAGGGTCTGCTGCTAGACCGTCAAACCTCAGCACTGGGCCTTGGCTTGGGCCTGCCTTTTGCCTGGCTCACCTCCCGATTACTCCTCCTCCATTACAGCACCCTGAGCCCCAGCCCTGTC	CCCTGCCTCCCGCTCCCACGGCTGATACCTGGCCTACCTGCTCCTCTGTGCTCTGACCCAGCAGGCACCATGAGCTTTACCCTCCACTCAGTTTTCTTCACCTTGAAGGTGAGCATCTTTCTGGGCTCCCTGGTGGGGCTTTGCCTGGGTCTGGAGTTCATGGGCCTTCCTAACCAGTGGGCCCGCTACCTGCGTTGGGATGCAAGCACGCGCAGTGACCTGAGCTTCCAGTTCAAGACCAATGTTTCCACTGGG
ENSMUSG00000005089	Slc1a2	E034	9.15e-11	-0.0438407					GAATCCGTGATCTTTCAGGCAAATATGGATAATTCAACTCTCCATTCAGTAATGAAAATCAAGATGGGTTCAAAACTAATTTTGAAGGAATACCATTTAAAACTATGGTTTCCCCATACACTGTAAGCTTGGATCTGGTGCTTCTCCACATGACCCATGGGAGGTGTTTCTTGTGGTTCGTGGCCTGTAAGTTGGATGTTGATGGTAATTGTTTTCAGGTAACTCTGGCGGCCAATGGAAAGTCAGCTGACTGCA	ATTTTCTTACTTGTGTTATTGTTTGAATGGACGCTGCTGGAGAAACTACTTTGAATGGAAGACGTGTTCTTGCCAGCTTCCTTTTGTCTCAGTGCAACACTGTGGATGCTATTTTTTTTCCAAGGGGACAGGATGAAAGCAGTGTGGTACCCTCCAGGGACTTAAGACAACGAGCACACATGTGCTGTCTTCCTTAAAGTGTTCATGGCTCACCTTGTTCTACACAAAAGATTCTGCTTGAAGCTTCTAGAATTA	GTAGTCGCCTATTCACTTTCATTGAAGTTTATTAGTTACAGAGTGTTAGTTATATCTTTAGTGGTATTTGTGGAAGAAGTTATGGACGGAAGTCTATGATACTTCAAATAAACACTTTCTGGAAAACCTCAGTACAGTATGCAGTAAAGTCACAGCTAATGAAGCAAATCTAACAGGATGTGTGTTATGATGGTTCATCTGTGAACCAGCCATGCTAAGGAGGCTTCCAAAACCCCTGTTCATTTCTTATCTAGG
ENSMUSG00000028945	Rheb	E007	1.26e-10	0.612043					TGTAAAAGCAATACTGACAATAGGTCAAAAATTATGATATAGCCTACAGCTGCCTGCCATGTCACCAGGGGCTATGTGCTTATGAAATGAGTTCGTGGTAGAGATCTATCTCTTTTTTAATAGAGAAAAAAAAATACAATACTGCATTTACATGTTCATTGTATATTGTAATGGTATAATACAGTGTTATGACTTAATTAAGCCTTATTATTTATTGTATTCTAGTAAAATTTCATTTTAAGCTATAAATATTTA	GGGGGGGGGGGTTCAAGACAGGGTTTCTCTGTGTAGTCCTGGCTATCCTGGAACTCACTCTGTAGACGAGGCTGGCCTCGAACTCAGAAATCCACCTGCCTCTGCCTCCCAAGTGCTGAGATTACAGGCATGCATCACCACTGCCCGGCAAAATATATTTTTCTACAGCTCTTGTTTTTATTTTGAGACAGGGTTTCAATGTAGCCCAGGCTGGCCTCACTCAAACATGCTATGTTACCAAGGATTAATTTGAAC	CTGCCCCGCTGTGTCTACAAGCTGAAGATGATACTCTTGACCATTTACCGTGATCAACTTGGTGAACGCTGCAAGGAAGAAGAGAATAAAATACTGGTTTAAATAAATTAACTCTACATTACTTAAAAGTTTGAACAATGACAAGTGACCAACTAAGTCCCTAATAGTCTTGTCACAACTTGCCATTAATGGAAAATGAACAAAGCTCAAAGCGTACGGAGTGTCTTCTTCCTTCATCAGCCTGCTAGGAATTGC
ENSMUSG00000020889	Nr1d1	E001	1.38e-10	-0.301072					CCTGGGTGGAGGAGGGGGACACTACCCAGAGGCGCTACTGAATGTATGAGAAGCTGGTGCTGAGGTGGGGGGAGGGGTTGTGGCTAGAAACAGGGAAGGAGATAGGTCCTTTCCCCAGAGATGGGTGGGACCGGCAGGGGTGACTTGAGGGGCTCCTCCTCCTGCCCCACAGTTGACAATCAGTATGTCTGTTATGTGCGAATTTTTCACCCCGTTGTGTTTTGGGTCAGGATTTTAAAGAAAGATATTTTTATG	CAGCTGTGAACTATTGGATTTGAGACAGGAACAGAACAAATCGAGGGGCCAGAGGAGGGTGGAGAGAGCAAGAGTGGTTTAAATAGGGGAGGATGGGAGCATGGCGGTGGGGGTGGGGGAAGAGTTATTTACAAGAAGGCTCAGGGGGCCAGAGGCTCATCTTGGAATATTTTATAACAATATAAATAAGATTCTGGTTTGCTTTTCCTTTTCGTCTCGTAAAGGAGAGAGAAGTGCAGAGTTCGATTCTGTACA	CTGTGGGGAAGACGACAGCAGTGAGGCGAGCTCCCTGAGCTCCTCCTCTGACACGGAGGACACGGAGGTCTGCGAGGACCAGGCAGGCAAGGCAGCCTCTCCCTGAGGCCCCTCGGAGGGCAACGGGAAAGGAGAAGGAGGGCGCTACTCCTTCTCCCTGGGGGGCCTCTGCCCTAGAGCGGGGCCACGCCCACACGCTGGGAGCATGGCCACAGGCTGGCCACCTCCCACTCCTCGAGCCCACCCTCCTACCCT
ENSMUSG00000041268	Dmxl2	E003	3.38e-10	-0.270901	recognized	148	recognized	422	TATAAGACACTCACTTTTAAAAGGCAAATTTATTACCTTTTAGATTCTTGTTGAACACTTCTACTATCTTAGTGTGTACACACAAAGACAATGCACATCCACGGGCTGCAGCATCTACATCGTGGTCCATGTGGTGGGTAAATGTTTACCCCTGCATTTTTGTCCATGTTCCCGTGTTGAACATTCTCTCCCTTCCAACTCCACAGAAGCACGGTCCCCAGAACAGCTCCTTCACCAGCACTACCACCCATCACA	ACTCTAACAAATAACATTTCTTTTACATATGTATTTCACAGCATGATTACACATTGCCTTCAGAGAAAGGTACTCTATACCGTCATGTTTACTATTTTCCACATGGGCATTAAACATTCTCATTACATGATGAGACAATTTGCTGGTAAACACTTAAACACACACAGACACTGGTTTCAATATTGCAACATATTTTTGGTCATAACGAAGGAAATACATCAAAATATGACACTGGCTAATATTTTACAAGCAAAT	TTACTGTTAGCTAACCTCAAGTGTTTCTGAATCAGGGTTGTTACATGGCGTAAAGGATAGCTTCCCTTCATAAGATACAAGGTAGGGTTTTTATGTTTTAATACATCAGTATAATGACAGGAACATGCACTCTACCAACCTGGGTAGGCAACACTCAGAGTAAAACCCAGCTTGCATCAGAGTCAAATTCCACAGAGACTCTCTCTGCTGATTTCAAGGTGTTGACTGTCGTGGAAAACAGAACTGCCTAATTCC
ENSMUSG00000056342	Usp34	E093	3.38e-10	-0.246219					GCGTTACTCCACATTACCAGAGAAACCAAAATAGATTCCTGGGAAATAAACATCTTCATTTAAATGAAGTTTTATCCAAATGTTGCCTTCAGGATTTGAACTCTTCCTATCTGGGTTTTTGTAGGACCTGAGGGCACTTGCTTTGCTCCTGTCAGTACACACTCCCAAACAGTTAAACCCAGCTCTGATCCCAACTCTGCAAGAGCTTTTAAACAAGTGTAGGACTTGTCTGCAGCAGAGAAACTCACTCCAAGA	TGACGAAGGAGCAACTCCTGTTAAAAGACGGCGAGTGAGCAGTGATGAGGAGCACACTGTAGACAGTTGCATTGGTGACATAAAAACAGAGACCAGGGAGGTCCTGACCCCCACTAGCACCTCAGACAATGAGACAAGAGACTCATCGATTATTGACCCAGGGACAGAGCAAGATCTTCCGTCTCCTGAAAACAGCTCTGTCAAAGAGTATCGAATGGAAGGCCCATCTTCATTTTCAGAAGATGGTTCACATAT	TGGTTTTATTTTTATTGACATGACTGCTGTTCTGTGTACTTATAAACTGACTGTGATCACTTTTCCTTTGTTACATAAGTCGTTTGTTTCTTCAAATGACAGCAGTAAGGAGACTGAAAGGGAACCACGTGGCCTTTCTGCTATTTGAGAAGTCCTCTTGCATCCAAAACAGTTAATTTACCATACAGATGTCTCATCCCTCCAATCCCGAAGTGTGTGGCTATTTGGAAGACATCAAGGAGAGCCAGAGAAGTG
ENSMUSG00000019943	Atp2b1	E021	3.53e-10	-0.0781102					TTCATTGTGGCACTCAGCTTATATTTGCTTGGCTTGTTCATAGTTGGTGACACCCTAATTCCTAGCATGATAAATAGTCCCCTTTGTGCTTGACATTGTTAACCTTGAGTTGTTTTGAGAAATATGTGCTTTTTTATTTAAATATAATTCAAGTAAGCTTGTGTATGGCTAAGTTCTCATTTTGTTTTGTTTTTGTTTTTGTCTTCTTAGGGAAAAAAAATCCTACAAAATGGCTATTAAATTTGTAGCCAGTAA	TCCGAGTGGTGAATGCATTTCGTAGTTCTTTATACGAAGGGTTAGAGAAGCCAGAATCAAGAAGTTCAATCCACAACTTTATGACACACCCTGAGTTTAGGATAGAAGATTCAGAGCCGCACATCCCCCTTATTGATGACACTGATGCTGAAGACGACGCCCCAACAAAACGCAACTCCAGCCCTCCGCCCTCTCCTAACAAAAATAACAATGCTGTTGACAGCGGAATTCACCTTACAATAGAAATGAACAAGT	TGGGGACTGAACTTTTTGACCCTTGGGATGATCTGAACACCATATTTTGGCATTCCTTTTTTCCTACCTGAGATTTTTGCTTTTAACCTACGTAATGCAGAGTCTATAAAATACTTGGAATGTTAGGATGGGTACGGGGACTCCGTGTTCTCATGCAGTTGCCTGGTTTCCCCTCTCTAAGGGAAGGGGGTGTAGTACCCCAGCTGCTAGAGTGTCAGCCCTCAGCCACAGCGTCCATTCTGCAGGCCAGGGAGG
ENSMUSG00000054280+ENSMUSG00000023452+ENSMUSG00000093574	Prr14l,Pisd,Gm20671	E005	6.67e-10	-0.57054					GTTGCCTGTTCTCAACCCTGCCCAGCCCAGGTGGCAGAGACAAGTCTCTCAGGGCAAAGGCCTAACTAATCAACACTCCCAGTATCAGCTGTGACTTTGACAAGGCGGGGCAGGGGTCAGACATAAATGCTGAAAGGTTAGCGCCAGCAGCAACCATTAACACCTAAAAAGGCAGAGTGGGTACCAGATTTTCTCACCCAAGCCAACTCTACCCTCCTGCAGGCTCCATCCTTGCCTCTGATCAGGGCTCCTGGC	CGGTCAAAGTGGATACGGATAGAGCCCACATTGGTGGCTCCCACTG	CTGTCAACGAGAAGAACCCATGTTTCCAGTCTCCAGTTAGGACTACACGCTCATTGTGACAAAAGAGCTCTTTGATCCATCGGGCCATGCCAGGGTTCACTGACATCAGGGAACCTGAAGAGACAAGAGAATATGCTACTTTCTGCTCAGAGCCTGACATGTTCACATCAGAATGGCCAAAGAGCCACAGGGACTCACAGGCCAAGCGTTCCAAATTCTAAGCAGGACCCCAGATACCCTTGCCTATAGTCAGCC
ENSMUSG00000026463	Atp2b4	E002	9.56e-10	-0.0867957					AATCATCTGAGAGATTGACAGTCCAGAGGGTAATGGGCTATCTTCCTTGATCAGAAATTGGGGTCTAAACCAGCCTTGGAGAATGTCTGCCTTTTCAGGCAGTCACTATAAGGTGGATTAACTTTGTCAAAAGGCATTTTAGGAAGGGAGGGGGCAAAGTGAGGAGGAGGGACAGGGAGGAGGGCATGAATGAGAAAGAGGAGGACCTGTGCCTGGAACCTCTTACTCATCTTTCCCAAGGCCTCAGGACAACTT	TACAAGTGGGCATGGGTTTTTATTCTCAGTGCATGGCATTGGTTTCTGTTCATCAGCAAAAAGCTTTATTGGTTCCAAAAAGTCACCCCCTTTAAAACTCCTTTTCTTCCCGTGTCAGTTGTATAACACATTTGCAGTATAGATTTGTCAGTTTCTAGCATCCCCCCTCCCAAGAACCATATAAATACATGCAAAACATTATACATAGAGCTTAAATAATATCAAATGCAAATACAGATTGGGTGCACTGCTCAG	GGGTATTTGTCTTGCACCGAGCCCACAGCTTAGCTTGTAAATGTAAATGGCAGAAACTCATTGGATAAAATTTTGGAGTCAAGAGGAGGTGGTGGCGCATGTGGGAGTGCTGTGGAGATTTTGGGTTGGGTGATGCCAAGAGGTTTGCCACCATCTCTTTAAAATGACAGCGAGTACACCTGAGGAGTGGATCTACCGTTACCTGCCCAGGGTTTGACTGAATCCAGGTAGGTCTGTGCTCCTGCTTCTTCATGG
ENSMUSG00000040565	Btaf1	E013	1.76e-09	1.54055					ACAGAATTTCCTTGAAAAGGAAACAGCTATTTCTCTCTAATTTTGTCCCTTATGTTTAGAGATGTGAAGTTTGCTTTTGATTTTATATCTTAGCATTTTAACCTGATCTCATTTTGAGACTATTAAATTTTAACACTTCCCATTTTATTAAATCTAGAATATGAAGTTAAAAGTGCAGTCAGTATTATTTTATGAGCTCAAAAACTAAACTTGTATTTGTATGATTGTTGACATCGCTTAAAATTCCCTGAAATT	TACCCTCCATTATAAATACCTTATGGGATTCTCTTCTGGAATTAGATGATCTAACAGCTTCAACAAATAGTATTATGACTCTCCTTTCATCCATGTTAACTTACCCTCAGGTCCAGCAATGCAG	GTAATTATTTCTTATTAGAGGTATAGAATAATAATCCTTTATATATCTTTCCAGGTGATTAAACTTAGACTGGTTTAGCACCTTTAAAGAACAGTGCTGTAAGTTGAACACAGCACTTTTTCTTGGGACGTTTTAGTCCTTCTTTGTTCTAGTTACTAGTACATTTGGGACAGGGCTAGAGAGATGGCTGAGTGGTTACGAGCACGGATTGCTCTTGCACAGGACCCTAGTTTGATTCCCAGCACCCACATGACT
ENSMUSG00000025576	Rbfox3	E005	2.05e-09	0.725982					TGAGGCCAGGCTGCAGACCTGGGATGAGTGATAAGCCGCTGGCCCCTAACTGCTCCAGCCCCTTCAGGGCTCAGCAGGCAATAGCCCAAGTCAGCTGGCCGCTCCTTCTCAGGGGCCTGGTCCACCCTAGGAACCCCCTGTCTGGGGAGCAGGGTGGGAAAGGAAGACTGGATAGATACCGGAGCCCCCCGCCCCACACCCACTGGCCACGTTCCCCCTCCAGGTCTTCCCCAGTGTCTGGCCGCGTCCCCACTA	TACAACAGAAACAGAAATGAGGGCTTGCGGTTTCCGAGCGTCGGCTGCAGCATGCAGGGCCACCGTGCTTGTGGTCTGGGGTCCGACCTGAAGCCACACTTCCCCTAAACCTGCCCTGAGGCCACACACCCCCCCAATCCTACCCATACCCCCACCACAGCTTCTGGGACCACACCACAAGCTAGACCTAGAGTAGACCATCTCATAGCAATGGGCAGGGCTCAGAGTGGGTAGCGGGCATGGTGTATGGTGGAG	GATGGTTAGTAAACTTTAATAGAAACGATAACTTCGGCTGAGTGGAAGTCCAGAGAGGGCATGCAGTTACTCTTGACAGTCTCTGTGAAAGGTGGGTGGAAGTCCCTCCCACTGGGAGGACCCCACTGACTAGGCCTGGAACTCCTCTGTCAGCCAGCAAACCCGGGATGGCCAGACCTGCCGGAGCTGACTGAGGTGGCTCTGAGGGAGGCTTGGCCTGGCACTTCTGGAGCCCTGAGGGGCCGTGGTGCCCTG
ENSMUSG00000037996	Slc24a2	E002	2.05e-09	-0.0436133					TTGTAAATCTATCCAGTTTTTGAGGCATCTGAGAGGAACAGATGTGTAGATCAAATGCTGGAGAGAGTTCAATAACTCAACTCATAAGTTAACCATTTAAATATAAGTCAATTAGTCATATTCAAATGAAAAGGTGACCATATATATTTATATAAAAACATTCAATTTATCACAACATCTATTTTTCCAGCCTTTTTAGGATAAGGTCTCACATCCCTGAACTAGCTTTGAATTTAGTATGTAGCCAAGGACGAC	GAGTCAATTGTTTTATTATTATTACTTTTACACTGAGGAGACTTAGTTACATAAAGTGTATTCAGTAAGTTATCAGCAGTATAAGCACAAGGATGCAGACAGTGGAACATGGAAGGAAACCCTTTACCAGAGTGAGACCACGTGACCCAAGCACACCACTCCAAACAGCCTATGTACAGTTTGCCATCCGAATTCCAGTTATGTACAGACAGAGTCACAGAGTAAATGACACGGAGTCGCTGTACGTCTAGCCAG	CCTGTGAAGTGAATGTCCCCATGGGAATCCATCCTTCCTCCAACCTTCCAAGGAGGGATACTTGCCTCCCAGGGCTGTGCACAAGCTGCCTCTTCTCAAGACTGCAAGGAGCCTGGAGCCCAGAGCCGGGAGGGACCATCCATGCTGTTGGTTTAAGATATGGCTTTTCCACTAGATGGAGACAGGGCACACGAGAACTTTGTCTTCCAGGAGGACGCTGACCACCAGGAACACGAAGTAGAGGCCAAACATGAT
ENSMUSG00000005871	Apc	E032	2.44e-09	-0.107442					TTCAGAGAAGGGAAGTTCAAGCATTAAAGATTCAAAAGACACCCATGGGAAACAGAGTGTGGGCAGTGGCAGTCCTGTGCAAACCGTGGGTCTGGAAACCCGCCTCAACTCCTTTGTTCAGGTAGAGGCCCCAGAACAGAAAGGAACTGAGGCAAAACCAGGACAGAGTAACCCAGTCTCTATAGCAGAGACTGCTGAGACGTGTATAGCAGAGCGTACCCCTTTCAGTTCCAGTAGCTCCAGCAAGCACAGCTC	CTGGTGTTAATCACTACTGCTGTATAGAGACTTTATTTCAAAGAAAACTTTAAAGGTTGAAAATTTTTGTAAATAGGTTTGATTCTTGTTAGAGGGGTTTTGTTCTGGAAACCATATTTGATAGTACACTTTGTCCTCACTGGTCATTTTGGGAGGCACTCTTATTAGGTAGGAAAAAATGGTAAAGCCAAGTATATTTGTACAGTGTGTTTTACATGTATTTAAGTAGCATCCATCCCATTGTCCTTTAATTAT	ATACTAGTGAAGGTTGCCATTGAATATAAGCATTGAATACTAGTAAGAAATGTCTGTTGAAAGAAATTGCCTGCCCATTAACACATTCCCATGGGACCTAAACACTACCCCACTGATGAACCACTCAACTATGTACCCAGTCTTTCCCCTAGTCATGGCTATATCTGAAGACCTATATGGTCTGCCTTAGATTAAAACTAAATTGACGCCGGCAGTGGTGGCGCACACCTTTAGTCCCAGCACTGGGGAGGCAGA
ENSMUSG00000020431	Adcy1	E024	4.13e-09	-0.0591321	recognized	253			AGAGACTTAGGAGGACAGCACAGCTCCAGCCAGCAAAGAAGCCAGGATGTCACGCACGCCCATAACCACAAGGAGCTGAAACTGGCCAAAGCCTGAGTATACAGCAGGCAGACCATCAGAGCCATGAGGGAGGAGGCCAGCCAGTGGCCCCTGGATCTGACCTATATGACGCTGAGCAGAGCCAGCCTAGGTCGATAACACTGCAATCACGCATGCGTGTGTCAAACCGAGGCCACATGGGTGCATGGGCAGAGC	GTATTATATTGCCTTATTTATTTTTAATCTTGTACAATATTCATGTACAAATGTTAGAGCCATTTAGGTAGGATTCTCTCCAAATTATTTATTTTAAGATGCTCTGTAAATAGTGCACCAGTTACAGGTGCTTGATCACTTGTACCAAAAATGAGGAAAAGCCTGGTACCCACTTCAGCCCCTCTTGTAATGCCGTGGCCCTTGGGAAATGACCCTGTTGTGTTCCCTTCCCGCCCCTAGCATGCCTCCCGTGCC	CTCTGGCCATTTTCATTGAAAGACAAATGGTCGTATGCACGTTCTGAAGTCATCCATGACTCTTTTTCTGGGGTGAGGAGTTATTATTCAAAATGTCACATGCCACATGACCCCCGAGTGACATAAGCCATGTTCATTTTTACACCTTCATATTTTTTAAACCTGGATTTTAGTCCTGGGCTTCTGTGAATTCCCCAGTTCAGATATTTCTCTTATTCAGACAACATTTGACTATTAATATGGACTCTCCCTGCT
ENSMUSG00000055567	Unc80	E071	5.05e-09	-0.0933341					CAAAATTTATTTTTTAACTGTCCTTTCACTACATCCTATAAATCAAAATTCTAATGCCACATATCATTCCATTTCATATCTACTGTATTAGACAGAGAATATCTAGAATCTCAGATATGATTCTGAATTAATAACATAGACAGCTATACAATTATGAAAAAGCTAAATGTAAATAGCTTTGCTTGAAAGAGATGGCATTCCTAATTCTACCCATGATGACATCACCGTTCGGATTAGGACCTATTGGGAAAGAGG	AAAATTTGAAAGGCTTGTCAGGCCAGTACTTAGTCGATTATTGAAGGGCTGGACATCATGCAGTTCATAAACATTTTTCAAAAGTTTAGCAGTTTACATTAGAGAAATGTAACTACTAAACCCTGAAAAAAATCTCATAACATACCTACATCGATGTGTGTGTGTGTGTGTGTGTTAGTCTTCATGTAGAAGTTAAACAGAGATTTTGATTATGTTGAGATGAGTTTAAAATATATTCTATATGCTTAAATATTG	ACCGATTAGCTGGGTAAGGAGGTATTTAAAGGAAGAAACCACAACTCAAGGAAGTGGGGAGGGCTTTGTTGGAAAATACCAAAGATACCAGTTAAGAGTCCCAAGGAAGTGCAAAGTCACAAGAGTCACAAGGAATACCTGGTAATTGTTCCAGTTATCTCTCAAGACAGTTTCTAAGAGCCCCTAACAATAGCACATTTGCATAGCAATGGTCAGGGTGACTTTCTTTGAATGAACACTCTTTGAACCCAGGAA
ENSMUSG00000028945	Rheb	E001	9.91e-09	-0.226406					ATGACTTTCATATGCTAAGATAAACATTATCTTTTATGACACACTATCTCGAGCTGTCCAGTTCAGCTAGAGTGGTGACAGCAAGCTCCAGGAAGCCTGTCTCACCTCCCCAGTAAGGGCTTTAGTAAATACTGGGACTCTGATCTTAGGTCCTCACGTTTGCACACACACTTTCTTTCCCAACTGAGTCACCTCCCCAGTCCTTGCAAGATCGCTCATGCTCATTTGTGACAATATTTACTGCCACGATGGTAG	GCAGTAAAATACTGTTTACTAGGCATGACATGGCCACTGCAGTTAACACGGAAGATAGAGACCAGATGAACTAACATGCCAACAGGAGGCAATAACTGGATGCAGGAGAGAATGTGAAAATGTAAGAGGGAGGTGTTGGGGCCAAGTGAGGTAAAAGAGCCGGGGTTAATAGAACCAGGGAACACTGTACAGCCAGGCAGTGGTGGTGCACGCCTTTAATCCCAGCACTTGGGAGGCAGAGGCAGGCAAATCTCG	CATCACCGAGCACGAAGACTTTCCTTGTGAAGCTGCTCCATCAATCTTTTCTGCTTCCAAAATTATCCTTTTAAAAACATCAACAGCAGTCTGAAGAGAAGTTAAGAACAGTGACAGGATTAATTGTCAGAGACTCTGGTTCATGACCAACAAGACTGAGGAGGGCAGGCACCCATCTGTTCTTCAGGGCCATGTCGGGGCTGGGAGGCCCCTAGAAGCCCCATAAGCCACATGGCCTTTGTCAGAGCAACTAGC
ENSMUSG00000039585	Myo9a	E054	1.53e-08	-0.114111					GTGTGTATGTATATATATATGTGTGTGTGTGTGTGTGTGTGTGTATATATATATATATATATATATATATATATATATATATTTTTTTTTTTTTTTTTGTTTTTGTTTTTCAAGACAGGGTTTCCTGGCTGTCCTGGAACTCACTTTGTAGACCAGGCTGGCCTCGAACTCAGAAATCCGCCTGCCTCTGCCTCCCGAGTGCTGGGATTAAAGGCGTGCGCCACCATGCCCGGCAATTTTTTTTTTTAATGTTAA	GAGAAGTTTAGCCCTTAGCTCCCTGAAAGCAGCTGGCAAGTCTGAACCTTCAAGCAAGTCGCGGAAGCAGCTAAGAAAGCAGCCAGACTCTCTAGACTCCGTCAGCTCCTCCGTTTCTTCATGTCTATCAAACACTACATCATCTCATGGCACTAGAAAGCGATTTCAGATTTATTCCAAGTCTCCATTTTACCGAGCTGCTTCAGCTTGTGAGGCCCAGGGAACGGAAGGACCGCTAGGCCAAGCCAAATCCCT	TATGTGTGGTTTGTTTTCTGGCTTCCAATCAGACTCATAGCCCAAAGGAACACCACTTACTACTTATACTAATAAAATTAAAGGAAAGGATCCAATTCCCAACTGATGAGTGCAGAAATGACAGCTGTTAGAACTCAACTGAAGAAGAGCAAGCCAAGGTCAAGGAGAGAACTAGAGGCACCTAGCAGTCACTTCCTGTGAAGAAAAAAACCCAAACAACAATGTATAGTTGAATTTTCCAGTGAGGGACAGTTG
ENSMUSG00000015501	Hivep2	E009	1.78e-08	-0.113345					GGATTAAAGGCATGCGCCACCACACCCAGTTCACAATGGTTTTCTTAAAGCCTGTTGCCAACTTATTATTTTTACCAAGCCTAGGGAATATCTTTCAGTGCAGCCTACAGCATAAATAGTTGATAATCTTGTTCCCTTTGAGTTTAAATCCCATCAATATTTACTAGTCATCCTTTGTGTGTTTTGTTTTGTGTTTTCTTTGTTGGTTTGATGTTTTCCTGGTGAATCCATTCTTTTTACTTGCTCTTCTGAAGA	ATCTAAGAAGAGGAATACCTCAGGTTCCTTACTTCAGTCTCTATGGAGACCAAGAAGGTGCTTATGAACATCACGGCTCCAGCCTTTTCCCTGAGGGTCCTACTGACTATGTCTTCAGTCATCTTCCACTACACTCTCAGCAGCAAGTACGAGCTCCTATACCCATGGTGCCAGTTGGTGGGATCCAAATGGTTCACTCCTTGCCGCCTGCCCTTTCCGGTTTACATCCTCCACCCACATTGCCTCTGCCCACAG	AAGTGTCTAGTTCTTGTGTGTGTGTGTGTGTGTGTGTGAATGTTTTGTTTCACTTCTGATTTTGTTTCTTAGAGGCTTTTGATGCTTTTAACCTACACTCTAATTTTAATTGTTAGGTTCCATCTATCTCAAGAGGCACATCAACTGCAGATGGTCTCTAACCAAGTGATAAGGTAGTTATTGGTTTCCATGGGTCATCTGATTAGCCTAGATGGCAGGGAGTTTCTAGAATGGAGGCTTGCGAAATGAAAAGAC
ENSMUSG00000040565	Btaf1	E038	1.83e-08	-0.303572					ATCCCAGCACTCTGGAAGCTGAGGCAGAAAGGGCCAGCCTGGGCCAAATTGTAAGACCCTGTCTTACTTCATCCCTCCCTCTTGTGCCCGTTCTCATCTTATTTATTAGTTAACTGAGAAAACTCTCACATATCTCAGACTATCCTTGAACTTGCAGTATAGCTGAAAATGACCTTGAACTCCTTATACAGCCTTCCTCCCCTGTGTGCCTGGGTTTGTGCTGTACTGAGGTCCAACACAGAACTCAGTGTGCAG	ATGGAAAAGCAGAAAAGGCTGACAGCTCCACTTCTGGGAAAGCAAGCATGAAATCAGTTCTTGAGAACCTGAGTGACCTCTGGGACGCCGAGCAGTATGATTCGGAGTACAACCTGGAGACCTTCATGCGCTCTCTCGAGTGACTGCTGCGTGCCGTGCCGTGCCCGGTGCAACTGCTGCTAGCTCAGTTACCTTCTGCTGATATTCAGCAGACTAAGTCTATGCGAACTTTAACTGAATGTATAAATAGATCTG	TAAAGTCTGTGCAATTGTGTGTTGTTTACAGTAAAGACTGACAAGCAGCTCAGATGCACAGGTTGTGGGAAGCCACACCTTTTGTATGTAAAGTTTATATTCAAATATAGAGGACCAAAAGGAAAACTCCAGATTTCATGTAGAAGATGCAGTGTACTTGTCTGCTTTCATAAACTATTTATTTGCTATTTCCATATCTTCTAAAAGCAGGGAGCGGTTTTCTCACTGAAGAAATAGTAAGGGTCAGAAGAAGTC
ENSMUSG00000053141	Ptprt	E001	2.17e-08	-0.0859999					TCTCCTGGAACTTGCAGGGGTGAGTTAGAAGAGACTGTGTCTCAAACAAGGCAAAAGGTAAGGGTTGACACTTGAAGTTGTCCTCTGACCTTTACATGTGCGCCATAGCATATGAAACACATACATGTGCGTGCACACACAGAGCATACACATAGAGAGAGATGAAAATATTTTAAAAATGTATGCATAGCAAATGTCACATTAAGTCTAAAGCCAGTATTCTGAACCACACTCATGGACACACTGCTTTAGAGG	CAGGGTCACAGCTTTATTGTATAGATTTTTTTTTAAACACAGCCATATTACAAACATTGTCAGGGAACATTTACAAGAATAAATAAGATGGACTTGCAGGTGTAAAAAGATTACACGTCACTTTAATGTACAGTCAAAAAATATATCTGATATTCATTGACCTGACATTATTTACCTTCTGCTTTTTGAAGCTAGAACTGGAAATAAAAAGGGAAAGGGGGGAAAGACATTGACAGCACAGTGCTGGCTTTCTTT	CCCTACCCTCCCCCCCCCCGGACCTGAAGAATGTTACTTCCATCCATGTACCCCACTTTCTTTTTGTGTGCACTGTTTTAAGATCACCTTCTTTAAGAACAGTTGGATTATGAGAAAATAAGGATATAAATTAGCCCTTCCCTCAGCATGGCCTGAATTTTCACACACTTCCTTTCCCTTGGAATTTTTTTTTTAAATTCCCGCCATTTATAATGACAGATACCACTGTCATCTTTATCTGTCAGCTCTTCAATT
ENSMUSG00000002028	Kmt2a	E001	2.93e-08	-0.120956					GGAAGATGGTGGGGACAGGGTAGAGCCTCCAGCTGGCAGATGCTGTGAACGGAGGAGGTTCTGTTTGGGGACCGCCTCAGGTACAGAGGTGTGCCTTCCAATCCTTAGTCCAGCCTCAGTGGCCAGGGTTACTGACCTGGCAGGGTGGTTTTTCAGTATTTCCCAACCGCACCCCCACCCCCAACACAGAATAAACAAATCCTGTTTCAGCTTTAAGGTGGAGCAGAGATGGAAATTATGCTTTCACTTTATTAA	GCAGCAATAAACTTGACATGTTTATTAATTAAACTATCACTTAAATAAAAAAAAGTGCATAGAAAATAAACATGTTTAAAAACTCCTTTTTTTGTTTTTACAACTATGTACACTTTTTACTTTTACATTCAGTCTTTCGTAGAGAGCTTTCAGCATTATTATTTTTTGAATATTAAAGTATTTTCCTTCATCCCTGTCTCAGGGAGTTAACACTGATGGGCTTCAGACACGTTTTCCTTCCCCCCCCCCACTTTG	CTACACACGAAGGAAAAGGAACCATTTTATTTACTTATGATTTTATTGAAACAAAGCTAAAGTCTTACAAATGCTAAGCAGGCAGGCAGCCTACCACCGAGCCACATTCCCAGCCCTGAACTTATTATGCTTTCTTTCAAGTGCTATGGGACGTGGGTGAGGGTCAGAGGATAACGTTTAGGAGTCAGATCTCCCTTTCTACCACATGGGTTCTGGGGACATAATTCAGGTAACCAGGCTTGATAGCAGGCACTT
ENSMUSG00000039716+ENSMUSG00000092963	Dock3,Gm22238	E002	2.93e-08	-0.107593					GTTCTCCACTCTTGGAGACACGAGGATGGGAACTGGAGACATTACCGCCTGGACTGCCCTAATGCTAAGTGCAAGGGCTTTGGCCACTCGCCCTGGAAGGCGGAATATGGAGAGCGGCCGACTAAGTGCAGAAAAGTATCTGGAGCTAAAAGGGCTTGGAGCCCGGCGACAAGGGTTTGAGAGGGGCACTTATGCTCCCATTCAGTGAAATCAGTGGATCAATATCAGGTATTCATCTTTAATTCACATCACAGC	AGAGGTTAAAAACACATTTATAGGGCTTATTACCAATTAGACATACTCTATACATTTTTTTGCTCAAATTCCTGTACAAATACACAGCATTCAAATAGGTATTTACAAATACGCTTTAAACAATGAAAATCAGTATTTCACAATCTTTTCAAAGGATTCTGATCTCTGACCTCCCATTTCCCTCACACTGGCTGGTTTTTCAATAAAAAGTATTCAGAATAGGTCCATTTCATCCAGTTGGGGAAAATGGAGAGA	CTGTGCGAAGGAAAGGGTGGGTAAGTTAGAACCCCTCTCTAGACAGGTGGACTGGCCTGCCATGTGGAGACCAAGAGTCAGCTTATCAATGAATTTTAAAGTCTCATCAGCTTCATGTCTGTTTCTTCAGCAATGACCCCTTAGGTATCTCCCCCCACAAAAGCAAGCTAGCGGAGCTCCAGCATCACTATGATGTCTGAGAGCCAATAAATGCCCCTGCCCTGGCTGATGGGCACTGATGCACCTGGGTCGAAG
ENSMUSG00000027273	Snap25	E006	5.25e-08	0.374071					ACAGCTTAATTTGTATTGATAACAACTTCCAGTTGTGTTTCTAGGAGCTTTAAAGGAAACTTGTTACAATCTCAAGAAAAATTATGTTTATGGTTAAAATTCAATATCCCTAGTCCAGGAAAGATGAAGTATCTCTCAGAGTGTAGAAGAGAGTTTTCTGTGCATCCAGAGCATGCAAAATGATTTTTACAGATTTCTTTGTCTTTGATACCAAGATCAAACTCATATGGTTTTAGTTTTATGACAATAAGCTTT	TAAGAAGTGGCTTCTATCAACATAAACTAGCTCCCTGTGCTGGCATGTTCATTCCCAGCTCCTACTGATTTTTCTGAACCCATGCCGCTCTTGCTTCCAATGCTAACAAAGCCTATCGGAAACCCAGAAACTTCTGGAAATGACATTAAGTTGTCAGCTAATTATCAAGAGGTATTCACTGCCGTTCATCCCAGGATACCTCTAGAGTCTAAGAGTATGGAGAAACCCACCATTTCCAAGCTACTGCTCCCAATA	AAAAAAAAAAAAAGACCTGGAGAGAACTGATTTTTCTCACACTGAATCATTGTACAGAACTGTGGATTTCAGAGCAAAATATGTTCTGATCTTCCTCCATCTACCAAATGTTGAAGAGCTTCTCTCCACAGAGTCAGTTTTCTTTATAGCCTTACCACTCAGCCTCTTCTCTTCTGTTATGAACCTAACTAAGTACCAGGACTCCAACATCCTTATTTATCTCCTATGAGAAATCCCTGCCCTGGCTATTAAATG
ENSMUSG00000068740	Celsr2	E049	5.61e-08	0.199083					CCCCTTGGTGGAATCCTGAGTCCCTAAAGCCCTCTGACCTGCCAAAGGCCTTGTGAGATCACAGGACCATCCTAATGAGGGTGCCAGGGTACTGAGGAGCCAACTTGCCTCGCCCCTTCCTCGCCAAGGTCTTCCCTCCCCCTCCCCCAGCTCTTGGGCCTTCCAGGCTTCCACGCGCCCTTTTTTTCACAATTCTTGGCAGCCATAGTCAGGGCAGGCTCACAACACTTCCCCCCACCACGTCACAGTCTGGTA	TGACACCAGCACACTCATGATGGCTTCCAGGGGCCGGTTGTTGTCCAGTGCCCGGCTCAGTCTCAGCTCACCGGTGGAGGCATTGAGCAGGACCAAGCTGAGTTCATTTCCTCGCTCGAAGCTGTACGTCAGGCTGTCTGAGATATCGGGGTCGTGGGCAGGCACACGGCCTATGGCACCACCGGGGAAGCTGCTGGAGCGGTTGGTGACATAGTTGTTAAAGAGAATCTCAAAGTTGCCCAGCACGGGCGGGTT	GCCGGCCCCGCCGCGCCTCATGCCCGGGCCGGGGCGCGGGTCCCCGGGGGCCACCTGTACGTCCCACTGGGCCTGCACCCAGATGGCTCGGCGGGGCCGCGCTCTTAGCCCACGATGCGCCGGGCTCCCACCACTCTCGAAGCCGGGCCCGCTCCCGAGTCGCCGCGACCACTGCGGGTTCACGCTGCGCTTCCACCTGCGCTCTGAGCGTTCTCTACCTGCGCCCGCGGGCCGCGAGGATCTCTGGCTCTGCCG
ENSMUSG00000025576	Rbfox3	E002	8.58e-08	-0.234313					TCTGGACCCCGTGCAGACCTCAGCCCTTTCCTCCCAGTTCCTCTCCCTCCCTCCCTCTTTCCTGATTCCATCAGAAGGAGTGTCCTTGTCTGTCTCACTGTCCCGGGACGCAAGAAGCTGGTGTTGCAGTGGTCACCTTGAAATGAGTGTAGGGTCACACAGCTCAAGGCATCCACACCACAGTGGCCTCCCTCCCTGAACACCATGGCTATGGAATGTCCAGCATGCCTCTGCTTCTTTAGGTGTGACTTGTCG	TTGAAGAAAGAAATCTTTATTAATCTTAATAATAATACTGTTAATTTGAATGGTCACACCGTGGAAGCATACAGAATGGTAAGAAAGGAAGCCTGGGGCTCGGCTGCAGTCCTGGGAGGGGCTGCGGGAAAAGGGTCCGAAACAGCAGAAGGCAAGGGGCTCCGTACAGAGGACAGAGCCAGAGGCAGGCGCGGGGCTATGTACATCAGGAATAGAAAAGGAGGGTTCCGTTTCCATAGCTTCTGTGGCTGATGC	TTTTTGTTTTGTTTTTTGTTTTGTGATTTTTTTTGTTTTTTTGTTTTTGCCCTTCATGGTCCGAGAAGGAGACGGTGGAAGGTTTCACTACAACAGAAACAGAAATGAGGGCTTGCGGTTTCCGAGCGTCGGCTGCAGCATGCAGGGCCACCGTGCTTGTGGTCTGGGGTCCGACCTGAAGCCACACTTCCCCTAAACCTGCCCTGAGGCCACACACCCCCCCAATCCTACCCATACCCCCACCACAGCTTCTGG
ENSMUSG00000027288	Zfp106	E001	8.62e-08	-0.108334	recognized	486			GTTTTGCCTGCATGGCTGGTGCCCATTAAGGTCACATCCAATTCCTTAGAAGTGGGAGCTAATGATGGTTGTGAGCACCATGTGGGTGCTGGGAGCCCCCCAGGTCCTCTAGAAGAGCAGTCTCTATGTCCCTGACCATCCCCCCAGCTTCACTACTTCTAGTTCTTGAGCACACTGACCACCCAGATCTTGTTCAAGATCACTGGTGTAGAACACACGAATGGGGGTATATTAATTACTATGTATGAAATTGAG	GAACACTTAGTAAAAGTATTTTATTTTCTTCTTGTACTTGCTTTATATCTCACTTACAAAGTTATGAAGTTCACAGCTTTTATACCAAAATGTAAGAAGGCTGTTTAGAAATATCTTTGCAGTCAAATGTCACCTGACATTTCTTCTAATCCATATTGAAAAACCAAGGTTCGGGGTAGCTCTGGGCATCTACTTCCCCCCACAGCCTTTCCTTCTCCACTCTCTGCCCCCACTGAGCTACTCCTGGTCTGGGCT	TATTTTAAAAAGAAAACTTTAAATTTAAATACCCAGTTATTTCAAAAGGAGGAATTAAAACTGATCTCAAAAAATCTATTATAAGCCATCATAAGAACATAAAACAAAAATCACAAACTGAATCAATAAACTATATGTATGATTAGGGTCAAACTGGGTAACTAATTAAAATCTGCATCTTTAATAAACACCTATAAACTAGCAGCACAAACCACTGTATGTCATTTGTTCCAGAAGAGTAGGTTTCTTAGAAAC
ENSMUSG00000024073	Birc6	E077	9.66e-08	-0.285924	recognized	310			GAGACAGGGTTTCTCTGTGTAGCCCTGGCTGTCCTGGAACTCACTTTGTAGACCAGGCTGGCCACGAACTCAGAAATCTGCCTGCCTCTGCCTCCCAAGTGCTGGGATTAAAGGCGCCACCACACCCAGCTTACTCTGAGCTTTTCAACATCTGGAATTAATTTCTATGTTTAGGAATTTTGCCTGCATGTATATGCATATGGGGGTGGTGTGAGCCCTGGAACTTGAGTTACAGACAGGTGTGAATTACCATGT	GCCACACTGCTCAGCTCCGAGAAGAGCTACTGAAACTTCCCTGCCCTGAAGGCTTAGATCCGGACATTGAGGATGCCTCCCCGGTGTGCAGGGCCACAGCAGGTGCTGAAGACACTCTAACCCACGACCATGTCAATCCCAGCAGCAGCAAAGACCTCCCCAGTGACTTCCAATTATGAGCTGCATTGATGTGGATTTCGTAGACACAAAGGCTTCGAAGCACAAGCCAAATATGTCAATATTTGTATGTAAGAA	TGTCTTGTTTCTAAAATAGTTGCCATGGTGTGCAATGGTATTTCTACAGGAAAACTTTTTGAAACTTGAGCGTGGGGGAAAAGAGGATGTTTTTGTAAGACCAGTTATTGTAAAGAAAGCTGAAAGCTGCACGCAGTGGCACTCAGTTATAATCCCATATGGGACAGTCTTTTCTTCACATTTCACGTTCCAGCACGACCAGGGCTATTTAGAAAGACCCTGTCTGAAGAAAGTAGAAAAAGGAAGAGCTGACGT
ENSMUSG00000030302	Atp2b2	E003	1.25e-07	-0.0677763					CAGGCATGGGGACACAGTGGTTCTTTATTAACCAGAGGACCCAGGATAGGATGGGCTCTGGCTTGGGAGCAGCCAGTGCCACATCCACTCTCAGAAATAGGGCACCTCCCTCCAGTCAGCTCTGCTGTGGTTGGGTTGAGGATAGGAGAGCATGGGTGGGTGGAGACATGGAGGCTGCTCCTCAATCCTGGATAGCTGGGAGCAGCAAGTTGAGCCTCTCCCTATCCCTCCACAGATGGGTGACTCTGAAGTAGC	AATGAGCAGAGACGGTGAATTCTTTATTTACAATTATTGTCTAGATAAAAAAATTCATAAAAACAGATGAATGGTCATAAATTATTGACCCCCTAATGGGGTGAACTGCCAAACGTATCCCATGCTGCTAGATATAGGACGCAGAAGTGCAAGCTTGTGTATTACAGTGAGTTCTGACAAACCAACCATCTCCTGTGTAGGTGTGTGTGTGTATGGAAGAGTGTGAGAGTGAGGGGCTGGGGCATAGGCTATCTC	GGAGAAAAAAAAATCCACGCCACTCTCTGCTCCAGATGACCCCAGGGCAACCCCGCCCAAGGCCTAAGGAGTGAAAAAGAGTTCAAACAGCATGGCTGCCAGAGAAAGGTCTGGTTCCCTCTCTGCTGTGTGGGTTCCGCCCAGTGCTCCTTGCTGTGTCGGGGAGTTGGTGCCTGGAAGGGTGTGCGCCTGGAGGCGGGTGGCGGCGGGTCCATGAGCGTGGCCAGGCGACAGGGGCCTCAGCTAAAGCGACGT
ENSMUSG00000084994+ENSMUSG00000031626	Gm16352,Sorbs2	E087	1.46e-07	-0.0904629					ATTTAGCAAGTGAGGTAGCACTGACTGTGAGGTTATAACACTTGTGATATTGGCAGCATCAATGTAGTGGTCGGTGTGGTACCGCAGAGGCAGCCTCTGGCTCCTGAATCAACCCCTGTGCTTTATCTGTCATTGTGCCACACTGCAACCTCACAGTTATCTCTTACTCCTTGCTTGGCATCGTGGTGAGCCAACTCCTACCACCCAGCTCTTCTGCGTGATTGTTTTCTAGATTGAGAGGCTGGGCTTGCCCCT	AACTTCAAGAAGAACCAAATTCTTTGGTACTTTTCCCGGAAACTATGTCAAAAGGCTGTGACTCACCTCACTCCTACTTTATGCCACATTTCAGCCACACATCTGCATTAACCCACCTGAAACATCCCAGCAGGCCCCTTGCTGCCATGCCTTATGGTTCCCAATCAGCCATTACCATCTCCACCTGCCGCCAGCCACCAAATCACCAGCAGGAGGGTCTGCCTGCCACTGGGAGCCTTGGGGAGGCTGGGAGCC	AACATCTTAGAGAAATCCACTTTACTATCAAGTTCACAACCAGTTTTATATTCGAAACGCTTGGAGTCAGCCAGCCAGCCACATGCAGCTTTGCTGATAAATGGATACCTTTTCACACCATTTATGAAAACAAAATTTCAACTCTGTTGCCTGTTCTATTTAAGAAAAATTGCTGTTTCTACTCTCTGTATCTGATTTTAAAAGGAAAAAAAAATTCACACCTGGCTTTCAGGTAACTGACTTTGGATTCTTACA
ENSMUSG00000026833	Olfm1	E006	2.39e-07	-0.169962	recognized	175	recognized	387	TAGCAGGCGGATCCCACTGAAGCAAAATAAGCGTCGATTCTTGTCCCAGGCAGGGAAAGGCTGTGCCTGCCCCTTTGCCATCATGACTTTACCTTGGCAAGAGATTTTGACCTTACAGACCAAAAAGAGTTTGTTTCTGTCCTGGCCAGCATCTGTCCTCCTGTGCTCGGCAGACTGTGAAGACAGAAGTGTCTTCAGTGACATGAGGTAGCTCCCCTTGGAGAGAGTCATCTACACGGCACCCTCTGAGATCCA	GCTAACTTAAAGAGTTTTTTCAATGCGCCAGTGACTGAAGAAGCAGTCCCCCATGTAACCATGAGAGAGCCAGAGAGCTTTTTGCACCATGCATTTTTACGATTCTTTTCCAGTCCTTAGCGCCATTTCACTAAGGAGCCTTGAATCCAGCCAGGATCCTCCTTTTGCATGCGACTCTAGATGCATCCCATGAATAGTTTGAACCCTTGTCAATGCACTTTTTGAAAAAGAAAGAAAAAAAAAACCCACAAACTT	AAATATTGTGGTGTTCTGAGGACTGTTTAATACGCTCTCCTGACTCACTGGGACCCGATAACTGACGGATTGCTAAAACGGGACTGTGCACACCTTCCCTCTCGTAGGGAGAAGCCAGGCCAAGGCAGGGTATTTCAAGTTTTTGCATGCATCGCACTGAACCAGCTTATTTTAACCTTGCAGGCAATAAAAGCGAAAATGGATGAACTTAGGCCTTTGATTCCTGTGTTGGAAGAGTACAAGGCCGATGCCAAA
ENSMUSG00000027254	Map1a	E012	2.44e-07	-0.0697106			recognized	203	TCCAGCTGTTTAAGCAAGTGGGGAGGTGACCAAGTTTTGTCTGCTTTGCTGTTTTTACAATGCATTCTGCTTGTCTCTACAGCAGCCTTGGGGTCCAAGGGTAGCTCTGGCCCTCCTGTGTATGTGGATCTTGCCTATATCCCAAATCACTGCAGCGGCAAGACTGCTGATCAGGACTTCTTCCGCCGAGTGCGTGCATCCTACTATGTGGTCAGTGGAAATGACCCTGCCAATGGCGAGCCAAGCCGGGCTGTG	TGACTCTGATTCCCACTCATGATACGGAGGTGACTCGTGAGTGGTATCAGCAGACACACGAGCAACAGCAGCAACTGAACGTCCTGGTCCTGGCTAGCAGCAGCACTGTGGTGATGCAGGACGAGTCCTTTCCAGCCTGCAAGATTGAGTTCTGAATGACCTGCGCTCCCTTCCCTAAGGATCCACTCCTACAGTTCATTTAGAGAATGGCTACTGCTGAGTCCTCTGGGGTTGAGGGAAGGCGAGCCGGGCAGG	TGGTGTGGTGCTGCCTAGGCTTTCCAAGGCTCCTCCAGACAGTAAGCTATCCTGGTTTCCATCCCTCTGGTTCAGTTATCATTTATCTTGGAAGACTCTCCATTATTCAAACCCATCCCAGGACTCGGGAGAGCCAGCCTGTGTGAAAGGAGGATGAGATGAGAGAACCATCATCATTTCTGAAAAGAAGCAGGGTGTGATGGTGCATGCCTGTGATCTTAACACTCAGGGTAGAGGTGGAAGAATTAGGAGTTT
ENSMUSG00000031229	Atrx	E001	2.8e-07	-0.122918					TTTGTCTGAAAAATACTGGGTTTATGCAAAATAAAATAAAATAAAATAAATTTTTAAAAAAGGGTCAGGGTGGGCAATGCTCAGTAAGTCTAAAAAACTGTTTTTGACTTCTTTAGGGATCAGGTACTATGGTCTCCATGCCTAGGGCTTCTGGGCAGTAATTACTCAAAACAAGGGTGGAAAGTGGCCCTGCCTGACTTAAGATGAATGGCAGAGCTGTGGAGAAGCAGGGAATGATGCTGGATTTACACAGAG	TTTGGTCACTTATGTCATTTAATAAAGTTTCAACTACTAAACAGCACTTTGAATGGTGAAAACACAGATAGTATATTGTCATACTTGAATGCTTTTCTTTAAAAACACAATTCCAGTCCTTATATATATATTACAAAACAGCCTTAAAGAAGTGACATCTTTTCTACAGTACTTAAGATACTCAATACAGAACCAAAAAGCAGTCTAACAGAAATAAAGGCAAGTCTTCACAGCTGTATGATTTTAGCAGCCAAA	GCCGTCTATTCATAAGTATTCGCTGAACACAGTTGATCAACTGGAGAGAGAAAAGGGAGCTGTATATATACACAAGTGTTACGTCCCGCCTCAAAGAGGCAAGTATCAAGTTTTGAGTTAAAATCAATTTGCTAAGGGAGTACCATACCAAAAGGAAAACACATTATTGTTATCACCATTACTAATTTGATGGCATTCACAGGACCATTACTGTAGAAACCAGTTAGTAACACCATTTAGTACTAAATTCTCTTA
ENSMUSG00000027799	Nbea	E001	3.54e-07	-0.111467	recognized	112	recognized	399	GAAGGTGCTATGGGGGCCTGGGAACCTTACAAGTTTCTGGCTTTTGGGGTAGGATGGGGAGAGGGCCAGTCTTTCTTGGGGTTCTACTGGCCCTGTCCTTTCCATTACAGGAATACAGATGACAGCCTTACCTGCCTGTCATCTACCTTGCAGCCGTTCAGTTCCTCTGGGCCTCAGTCCTTGCCTAGGTCCATGCCTCACTCATGTTGATGAGGAACACTGCAAAGTGTGGTTTTCAGATAGAAATGCCATTAT	CATATTTTATTTTTCTTTTTTTGATTTCCAACTCACACACATCTGGCATATTTTACATCTTTGCAATAAAACATGGTTACAATAGCTTAAGGAATTTATATATCCAAAATATTTCACCATGATCTCAAGATGAAATGACCTTGTCTTCCAGATGTTCAGTGCCTTCCCAATTCTAAGCTACAAACTCAAGATATTGCTCACAGCCTGGTGATGAAAACATAATCAGTACACTGATTCCCCATAATTTCAGAATTT	CTGGAAAAGCAGAGATGGTGAAAAGAGACAGGAAAACAGTATGAACTTGCCACTTTATGCTGACACCGGCCTTATCTCAGATGGTCCAGAGTCTTAGCAGAGAGGTTCACTGAGAGCGGTTGAGCATTTCCTCTTACTTCTGCTAAGAACTGCTGAGCTAGTGGAGAGTCCTGCTGGAGAGCACCAGTCAACTCCATCAAACCACACACTCTAGACTTTCTTGCCTGGGCCTCCTAAACCAATCAGAAGCTCCTT
ENSMUSG00000026764	Kif5c	E037	3.76e-07	-0.0496567					GTCTGATTGTCCCCTGGGACAGGAAGTGCTTTGTGCTATTCCGATGGCACACAGATGCAGAATGTACTGACTTTTGGAAGAGACTACCGTGACTGGGTCAGGACAAAATACTTAGATGCAGGATGGAGGAAGCTCTGTTATCCATCATGTTAGCCGAGTCTCAACTGAGAAGCAGTGAGGGCGAGCAGGAGACATCAGGCTGAGCACACGCACGGTGGAGTATGTGCCAGTCCCGCAGTGGCAACACTGTTGTGA	TATGACTCCACGTAGCATGAAAAGGACTGTAGTAGTCACCAGTTCCTTTCTGTCCCCTCCTATACAGTTTCCGTTTCTTTTTACACTTGCTTGCCCAGCCGTCTGTAGTACACCAGATTCAGGTGTTTGCGCTGTGTAGAATTTGTGTGCACAGATACGTGCTTGGATCCTTCTCCTAAGAAGTTGGAAGGAGGGGGTTACGCAATACCCACTTCCTGCTCAGACCTCGCCACTTCTCAGCCTCCGGGGTTGTGT	CTGGTCTGGTGTCCTTATTTGAGCCCCAGCAGGGTATCTTGACAAGAAGTCAGGAAGTGTGTGTTGGAATGAAGCATGTTTTGAAAGAAGTCACTCCAACATGAACCACCTAAGTCAAAGCTTTGTTCTTTTTTGTTGCTGGCTTTTTGTTGTTGAGGTTTTTTTATTTCCCCTCTAGGTATGTGCTTAATTTTTTTTTTTTTTTCATGCCTGGCAGTGGTGGTGCACACCTTTAATCCCAGTCCAGCACTCTGG
ENSMUSG00000024750	Zfand5	E012	3.86e-07	0.477347					AACCCTGCAAGGCCACTGTTAATGTTGTGTTCTCATTTCCTTGAAATTGAGGGTTAGGGATTGAAAGAGTAAGACTTGCAGTGCCTCACAAAGTGTGTTTCAACACAGCTGCTCCTTTTGTCCTTAAATTATAGGCACAGTTAAAACACTTTCTAGATATACAGTGTGATACTATACAAATATGCAGCCATGAGTTGATGAGCCATTTATCAAATTACTTTCTTTATTCTTACTCATTTATGCTAAGCAACCAAT	TATGCTTTTTAAGTTTAATACTAGTTCAGTTCTGAATTTTTTGCACTGTGAGAAAGACTTGAGTTGGTGACGGGATTCTCTCCTTTCCATTGAAGGAGCACAGGGAGAGCTGTAAAGTATAGGCCAAGCAAAGAAACAACATCAAAAATAGAAACTAGTATCTTCATCCTGTTGTGCTCATCCCTTCATTACCCTCACTCTTAAAAACAAATCAAGTAGTCTGGAAACTGGAAAGAACTTAATGACTTTAAAATT	TTGTCACTCAGCCCAGTCCATCAGTTTCTCAGCCCAGTTCTTCTCAAAGTGAAGAAAAAGCTCCTGAGTTGCCCAAACCAAAGAAGAACAGATGTTTTATGTGTAGAAAGAAAGTTGGCCTTACAGGTATTAACACAATTCATATCTTAAAAGAGTCACTACAAAAGGAACTATTTGGCTTTACACATTAAAAAAAAATATTCTAAAATTTCCAGAAAGGATTGGCTAATGGGTTAAGAAGTTAGATTTAATTCC
ENSMUSG00000027254	Map1a	E009	3.86e-07	0.0818523					TTGTGATCCTCAGCCCCACTCTGGGGAATACGGAGTGAGGAATGTGTCCTTATATCACTGAAGGGGGCAGGGCAGGGATTTTCAGTGCCTTTCCCTGGGTGCCCCATACCTGTGCCTTCTCTGCCCTCCATTTCAGGTTCACCATCTTCTTAGTAGCCCATCAGCTCACAAACTCCTCATCTTGAGTGGACAAACTTTAGAACCCGAGGGAGACCTTATCCTACAGAGTGGTACTTACTCATATCAAAACTTCGC	TTGCCCAGTTGCTTAGCAATAGAGACCCTGGGATCCAGGCCTTCCTCACTGTTTCCTGCTTAGGGGAGGGTGACTGGAGCCACCTGGGACTGTCTAGTTCCCAAGAGACCTTGCACCTCCGGCTAAATCCTGAGCCTGTGCTGCCCACCATGGATGGAGTGGCCGAGTTCTCCGAGTATGTCTCTGAGACGGTGGATGTGCCGTCCCCCTTTGACCTGCTTGAGCCCCCCACCTCAGGAGGCTTCCTCAAGCTCT	GTGAGTATATCAGGAAAGTGGGAGACACTGGGTTGTTGTAGGTGTGGGCTAGCCAAGGGCTCCAGCTGTTTAAGCAAGTGGGGAGGTGACCAAGTTTTGTCTGCTTTGCTGTTTTTACAATGCATTCTGCTTGTCTCTACAGCAGCCTTGGGGTCCAAGGGTAGCTCTGGCCCTCCTGTGTATGTGGATCTTGCCTATATCCCAAATCACTGCAGCGGCAAGACTGCTGATCAGGACTTCTTCCGCCGAGTGCGT
ENSMUSG00000030102	Itpr1	E062	3.86e-07	-0.125614	recognized	220			GACCCCTTGAAGAGTGTGGGCACAAAGTCTCAGACCCAGGGATTCTAAAAACACTGCTTTTTGCAGATAATGTGACATAACATAACATAATCATAGCGAGCTGCCATTTTCCAATGAGTCTTGACATCACTTGGAAATGGCGTTTGGAACTGATCTAGAAGCTATGCTTCACCTGTCTTTTGTTTCTCTATGAAACAAGCAGCAAGCAGTACTTGTGAATGTCACCCTGCTGTGCTCGCTTCGGCAGCACATATA	TGACAGAACAGAGGAAGCAGAAACAAAGAATCGGCCTTCTAGGACATCCTCCTCACATGAATGTCAACCCACAGCAGCCGGCCTAGGCAAATGAGGCAGAGGGACTCTGCTCAGCCCTCTGTATATCACTGTCAGGGTGGGTACGGCTCATTGGTTCTGATTTGCCCACTAAGGGTACATGTGCGCTTAGTACATTTGTAAATACTCAGTTTTGTATTGTATGTATATGATTGCTATTCTCAGAGGTTTGGACTT	ATGCAGTGACTGGCTGGTGGCTTTCATTTGTCATTTCCTTGTGGCTTGAGAACGATTCCAGTGTTAGACTTTTCTCCCCATTGGGACTGAGTAAAACTATAGCTAAAAACTCATTTGGTTGCCAGATTAAATCAGGAAATGCTAACCTGATTTTAGAAAATAAACAATTGTTTATATCTCAAGAGAAATCAGTCAAACAAATAACAGAGGGAACTTCATACAGAATTCTCCTCAGTGACTGAGTGGCACCAGGAT
ENSMUSG00000059742	Kcnh7	E001	4.82e-07	-0.048483					TGTCTGATCTAAGATGTCAGAGTTAATTTGGTTTCTGAATTTTCGTATATTTTAACTGAATATATTCTAGCTGAATTCTGATGCAAATAGATATAATTTTAGTGTAGCTGGTGACCAAATTAAATATTTAAGAAAGAACTCCATGATTTTTAAAAATATTTTTAAAAGAAAACTCCACAAAAGTGCAAGCTCTTTTTATAAATACAGAAAACTTAAAATCAGCTTTTACTTCAAAAGATCCTGAAAAGGAAATGA	GTATAAGTGCTTTTATTTATACAGTAAACATGTTTCCATGTCATTTTGAGAATTTTTTAATAAACATTCAAATAGCTTGCTGTAAAGTTTTGTATCATACAAAATTTGTTACATATATACTGCAATGAGATGCCTCAGTTCAAACAACGGTGCATTAATTCAGCTATTATCTAAAAGATTGCCAAATGGTTAAATGCCAGGTATTGCACTTCTAGTGTGAGTGGCAGTTTACACACTTTAAATTACATCAAGGGA	CTGGTAAAAGGTAAGAAAATGCACTTTTACAATTCACTCCAATAGTGAACTAAAATTACGTTCACATAACTGACCCAGAGGTGTGTTCTCTACCCAGTTATTGTATGTGACTAAGGGTATGAGCCAGCATCTCTCTCCTAAAATGGTCTAGACATTAAGGGGTCTGTGATCTCAGATGAAGAACTTAACTTTCACTCTACAGCCAGATCTAAAAGTTCAGTTCAGTTTTGTTTTGTTTTCTAAGTATTCAAAAGA
ENSMUSG00000032589	Bsn	E010	6.12e-07	0.127684					GAGGGAGAATCTCTCTTTGGCAGACTCCTCGGCGGTGGGGCTCAGGGGCTTAGGGTCGGACAGAGACCGCTGCAGGGTCTTCATGGGGCGAGGCAGAGTCTGCTGGCGAAGGGTGCTGTCAGCTATGAATTGCTTCTGGGGACTCACATGAGCCTTGTTCAGCCTCTCACTGGAAGCAAACGAAGTGTCCAGGAGCCGGTGTGGGGACAGGGGCGACACTGGAGAGTAGAGCACTTGTGGAGACTTAGGAGGCTG	TGTACCTGACAATCTCCACCTTTGGGTCGGTGGCAGCCGTGATGTGGATGGCTGGAGAGACCCTGGGCAGCTGCTCGGGCTCGGTCTGGACGGAGCAGTCGCTGATGGTCTGTATGCCCACGCTGCTCATGGCCCTCGCAGTGGCGGCGGCCGTGGTGGATGAGGAAGCAGTGGCATCGTGCTTGCTGTCAGAGCCTGAGTCTGAGTGACGGGAAAGACGAGACCTGCGGCGGCGGACGGGTTGCTCCCAGTCGG	CTGCATAGGGTAAAAAGCAGGCATTTACTCCTGATCTCCTGTCAATCCCAAGGACCACGGGAAGGGGCCCTCCACACCCTAGGGGCTATCTCTCTGGCCCCACATAACTTACAGACTTCACAGCAAGAGAAACTTTACTAGATGAATGTGTGGGAGACCAGCAAAGTGGCAGACACAGGACGTGTCTCCATCCCACAGACTCCAGACCAGCTGAACTTCATTTGTTGTTTGTTGTTGTTGTTTTGTGACAGGGTC
ENSMUSG00000020315	Sptbn1	E002	6.3e-07	-0.0815226					TGACTGCTAGATTTGAAACCTTGACTGCTAGATTTGAAAGATACCACAACCAAGATAGCCTCTGACTGTCCACCTCAGAAGTCCTAAGCACTAGGAAGCCCTGTGGCAAACTTGACATTGAGGAAGACTCAATGAACACTACCATAGCCATGTCCAGTTTTTGCATATTACCAAGAATGGCTTTTGTTCTGTAAGGGAAGACAGCCTTCCTTTGTCTATAGTATTTATTATTATCCCTTGTTCTTTTTCATGAAA	GATTTAAAAGCATTTAATGACATAGCATATATTTAACAGGGCAAAAGTTGAGAGGTACAGGTCGTATGATGGAGCACCAGGCCTGAGCGCCCACTCTCTGTCCAAGCTCAGACTCTGGAGGTCATTACTATAGATGCCATTTTGATTGTGCAGTAAGATGAAAATTTGTTATTACAATAGTTACAGTGACAGAGAAATGCACACTATGTATCAAATAGCAGGGTAATGAAGCAAATTATAACAGTGTGGCCACGC	CTAGATAGAGGAAGGGACACAGGTTAAGACTTGGTCAAGAGGGGCGGGCATGAGGAGTTGGTCTTACCTCCATGACGATCCAAGCCTGACAGCTAGAAGGCTCAGCAGCAGTGCCTCTAGGGTCACTGTCCTTAAATGCTTATCTACATTCTCAATACCACAGAGGATATGGCTTAGCCCCTCAGATGGGCCCACTGCTCTGCACCCGCAGACCATTACTCTGGGATGTAGTCCTACATACCTACAAGAGCTACA
ENSMUSG00000024811	Tnks2	E044	7.73e-07	-0.0805342					CATGGCTGTCTAACTTCAGTTCCAGGGGATCCAACACCCTCATACAGACTTACATGTAGGGAAAACACCAGTACACATAAAACTAAATAAATCATTTTTTAAAATATTTTCAAAATCAGAAAAGAACCATTGATATATCTAACCTATTCAGTTTTCAGTCAAATCTGTATCTTTTTCTTTTCTTTTTTTTTTTTTTTTTCTGTAAAATATAGCAATGATGTGTAATTTTTCCTGCAATAATTGACAAAGACCTAA	CTTATCCTGAATATCTAATTACTTACCAGATTGTAAGGCCTGAAGGTATGGTTGATGGCTGAAACCAGTTCCCCCAGACGAAATGTCCTGAAGCAGCTGACGGCCTCTTAAGTTTCACTCCTTGGCAGGAAAACAATTCATGCTGACTACAGGCCTGTGGCACAAATGATAAAATGTGAACGAAGCCCAGCGTTGTGACTTGATGAAGCTTTAACAGTGTACAGTGTTTCTGAGTGTTTCCTGTTCTCAGCACTT	TAGTTCTCTTGATTGTGCCTTTACCTCTGTCTTAGAGTTTCATTGCTGTGATGAAGCAATATGATGGTAGCAACTCTTATAAAGGAACACATTTAATTGGGTCTGGCTTAATGGTTTCAGAGGTTTAGCCCATCATCATCATGAGAAGCATGCAGGCCAGCTTGCTGCAGGAGCTAAGAGTTCTTGGCAGGCAGGCAGCAAGGAGAGACTGTCCCACTGGGATGGCTTGAGCATATATGAGACATCAAAGCCTGC
ENSMUSG00000061904	Slc25a3	E016	7.92e-07	0.379123			recognized	1	TTCCCAGGCAAACTGGGAGGAGTCCAGGCTAGTCTCCAACTCACAGTGATCTTCCTGCCTCTGCCTCCCAGAGGCTAGACTGCAGGCATGAGCCATCACTCCCAGGCTCTATTTAGGACTGTTTCTATATCAAGGTCTAACTTCCTTTAAATTATAATAATTCTTGGACAGTAAAAAACTATGTAATTCCAAAAAGAAAATTGCTCTTAAGATATAAGTATGTATTCCTGATCCCGGAGTCCTTTACGTAGATGA	TAATATTTCAACTTCCTTTCTCTTTTAGGTAAGGAGACTTCTAATCCTGTTTGGGACAAATAAATTTTTAATGTTTCATTACTTTTTTTCAATTATTATGATATTCAAATTATAAAAACACAAAAGAGGCAGTGCTCACTTTCCCTATAAAGACAACAAGAACTTTTCTGAGAAATAAACATGTTCTTTGCCTCAATATTTAGGGACAGGAAGTTAGTTCACATGAGATAACACAAGACTGACTGACCACTTTGA	CTGCATGCGGCACTTTACTAAGTCCAGGGGAACAACAGCAGTGTGTGTCAGCCCACAACTTAAGACCCCACCAAAGCCACACAGTGCATAATACTTCATGGAGCCAAATTCACAACTGTACTCTGTAATAAGACAAGACACACCGTGCATTTTAATATGGACTCGTATTAGTGTGCATCAACTTACCTCCTGGGCAATTAGGTTTCCACACAGCTTGTTAGTAGCAGTCTATATCTTACAACTCACGTTTCAACA
ENSMUSG00000076432	Ywhaq	E003	1.09e-06	-0.176364					ATCCGCCTGCCTCTGCCTCCCGAGTGCTGGGATTAAAGGCGTGCGCAACCACGCCCAGTGCTATTTTTTTTTCTAATCATGTTGCCTTGAAGATCACTTCTCAAATACTTAGTATTTAAAAATCACTGGCATTAAAAACATCATTTTGAGTGTAGACAGAATCCTAAGTGGGTTATCTGAAAACTAGATACTCCTGATGCTCACATAACTAAAGCCCAATTCTAATACCAGCCAAGGCACTCATCATCACATCAC	TTTATAAAATGTAGTTTTATTTTTATGTTACTCTGCTGTTACATAGGGCATAACATTTCCACGAGGCTTTTTTGGGACTACAGTCAATGATTAGCAAACACACAATATAGTGGTCCAACTCTCTAAAGAACAATCACTGGACAAACCGGATACCCTCTCCCATGTGCACAACTCTGCATGGAAAAGTATTGAAGTGCAGGCTTGGACTTGTGGACTTTATTTCTCCTTCCTAGTGTATTAAGAAAGGACATGCAT	GGAGGTGTAAGTGAATTTTTATTGGGAAGGAAGTTGTCAACTTAAACAGCAGCAAATGAAGAATGCATAAGGAAACTCCCTGTTGTCACAGAAAGATGTAACCTCCAGAATATGTGACACAGGAGACATTTCGATCTGTGACCCCAAGCCCGGATGCATTAAGCGCTTTCCCATTCAATCTAACACTTCTGGATTCCTACTAAAAAGGAATTTGTAGTAAGAGCATGGAAAAGTTGCTTCTGAAAGGAAACCTCC
ENSMUSG00000020524	Gria1	E024	1.19e-06	-0.0693117			recognized	290	GGTAACAGTATGTAGATTTCCTAAGCTCCACTCCAGTAGCACCAAGGAAATGGCCTACCAGCAGTAACCACTGAATGAGATAACACGGGGCTTGGTTCCTAACACATTAAAGCCTAGGCCCCCACCAAGGATAAAGAAAGGTGGTGTGTACAACGTGGTTGAAAAGAACTATGTGTCAAAGAAAGCAAAGATGCATCCCCCAACTCCATTGTCTGTGTAATGCACACTTACTATCAGCACAGACAACCTACAGGT	GTTTCTGTTTGATTCCACAGCAATCCATCAATGAAGCCATACGGACATCGACCCTCCCCAGGAACAGCGGGGCAGGAGCCAGCGGAGGAAGTGGCAGTGGAGAGAATGGCAGAGTGGTCAGCCAGGACTTCCCCAAGTCCATGCAATCCATTCCCTGCATGAGCCACAGTTCAGGGATGCCCTTGGGAGCCACAGGATTGTAACTGGAGCAGACAGGAAACCCTTGGGGAGCAGGCTCAGGCTTCCCCAGCCCCA	ATTACCTACCTTTCCTTATTGTCCGTTCCATGTTGTGCCATTTCTGAAGCTAGGGTTCCAAGCACTGATGTTTTCTTACCTTCTAAGACTAGCAAGTTTTTAACTCCACCCCTCTCCCCTATGCTGGACCTGGGACGTGGGACCTGGGACCTGAGGCCTTGTGCATGCTAGTCAAGCACATGGCTACTGTGCCCAACTCATGGACTCCTCAGAACCATTTCAGAACATTGTGAATGATTCATTAAGATAGGATTT
ENSMUSG00000068740	Celsr2	E001	1.33e-06	-0.168704					CCATCCTCTCCATCCTCCCCATCCTCCCCAGCCTCCCCAGCCTCTCCATCCTCCCCAGCCTCTCCATTCTCCCCAGCCTCCCCAGCCTCTCCAGCCTCCCCATCCTCCCCAGCCTCTCCATCCTCCCCAGCCTCTCCAGCCTCTCCATCCTCCCCAGCCTCTCCATCCTCCCCAGCCTCTCCATCCTCCCCAGCCTCTCCATCCTCCCCAGCCTCTCCAGCCTCCCCAGCCTCTCCAGCCTCTCCAGCCTCCCCA	TTACAGAAGCCAGCGATGACATGGCTCCTGCACAGAACTAGTTTATTCAGTAGTATGGGGGGGGAAAAAAAAACAAAAACAAAAACAAAACTCTACCATATTTACAGCGACAATCAAACTGTACAATCTGATGGTTAGTATCAAGTTAGCATCCAGCATCTTTGTATTTTTTTTTAAGTCAAGTCATCAGTAGTTAAAAAAAAATATATCCAGTTAAATTTTTAACCCTTTACAGGAATTGCTGAGGGGAAGAGG	AAACTGAAGAGAGGCTGGGACACGTCCTGGGTGGTCCTGTCCTCTTTGGGAAGGGGAAAGGGGAGTCCACTTCCGGCGTATAAAAACAAAAGTAATCCCTGAAGTCATGAAGAGTGGAGATCCTTTTTTTAAATTCTTTTTTCCTCTTTTTTTTTTTTCTGAAAAACTTTGTCTTGGAGATGTTGGCCCCCCCGAGGGTCCAAAGTGCAGTGAGGGGGAGGTGGGGGAGGGACTTGGCACTAGTTGGCCTTCTGG
ENSMUSG00000053025	Sv2b	E001	1.49e-06	-0.0592894					ATCTTAGGAATGATTCGTTGGTCTATTTTCTTTCAGTACCAAGAACTCCACTTTGAAGAAATGATGGTTATGTATCCAGTAAATATATTTCCCAGCATGCTCTACAGCAAAGAAGAGCAAAGATATTCATGTTTATAACTGAAAGGGGCCTCTAATAGAGCAAATATGAAGAAGCCTGGTTCAACTAGGAGGGTTAGTCCACAAAAGGAGGCAGCATCATTCTAGACCTTATTATACAGTCCTAGCACATGGGTA	ACTAATCAGTTTTAATAAAACAAAAGCTCAGAAACCAGCATCAGGAGATCCCACAACACAGTTGAGACTGCTGAAAGTATCGGCTCCCAAACAAGCCATCATAAAATACATAATGAACTGTGAACAGTCTGACTCAGTGAGGGAACGGCTCTCTTCTTTAGTCCTCTATAGATGCCATTGGGAGTCTCTCAGGGCAAAAAAAAAGAAAAGAAAAAATGGATGGCTAAGGATGTTGTACATTACACCCCAGTGACC	CTGCAAAAGAAGAGGACAGGAGAGGATTCTGAAATTCTGGGCTTCGCTAGGTGAACGGCTGTATGTTCTTTCCTTGTTGTAAGAGGAGGAGGTGTGGGACTCAATTTCTTATCTAAATATAAAAACAGCGATTTCATTTTAGCCAACACTGGAAATACTCAATGAAATTAAGATGTAGGGATACCTGGACTAATAGCTGCTATTAACATTCTGAATTGCCTTCAAGCCTCTTTCCTTATCTTCCCAAGCATATCT
ENSMUSG00000026490	Cdc42bpa	E003	1.53e-06	0.316394					CGGCGCGGCCCGCCAGCGGCCTCCGGCATGGAGCGGGCTCGCGCGGCCAAGTAGCCGCCGCCCCCGGAGCCCGGCGCGAGAGCCGCCCGCAGCCCGCCTCATCCCGGCTGCGCCGCCGGCCAGGCCCCGGGAGAAGCCGGGAGGAAGATGACGCGTCCTCGCCGCAGTCCGCTGGAAGCAAGACTCGCTGCAAAGCCCTAGGAAGAAAGAGCTCGGAGCGGAGGCTCGGCGTGCTCCGAGCCGAGCCGGGAGAAC	TTTTTTTTTTTTTTTTAAGGAGTGTTGACTCTTTAGTTCGTTGTACTTTTAATTATTATTTTATTTAAATGTACAATTTAATTGTATTATTCTCTTAAAATATTAAATCTATATTTTATGGAAACTCACCCTCAAGATATATATGTTTATGGGTGAAATTGGAGACGCTTCCGTTAAGTGAGGTGACTGGTGTATTGGATGTTTAATTCAGCACCGGCATTGCATGACAGTTGTTGAAATAACAAGTGGTTTATT	ATGTCCGGAGAAGTGCGTTTGAGGCAGTTGGAGCAGTTTATTTTAGATGGGCCAGCTCAGACCAATGGGCAGTGCTTCAGTGTGGAGACGCTACTGGACATCCTCATCTGTCTTTACGATGAATGCAATAATTCTCCATTGAGAAGAGAGAAGAACATTCTTGAATATCTAGAATGGGGTAAGTTTTCTTCTAATGCGTTGCTGGGCGTGAGCATTATTAACTATAGTGAAAATGATGTGTATAGCCTTAACAAC
ENSMUSG00000045962	Wnk1	E002	1.65e-06	-0.103801					TGGTTTCTGGGAATTGAACTCAGGATATTTGGATGAGAAACTACTTAGCTGTCTCCCTAGGAATAGGTGTTTTAAGGAAGTAACTGTTCTTTAACTATACCACACCCAAAGTTTCATGATTCTTTTCAAAGGAACAATGAACTTCCAATTCTACTTAAGCTGAATTTAGGGTTATGCTATGAGGGAATTGGTGAGTCCCTGGGACCAGGCACAGGCTTGGTGAGAAAGAAGTGCCTCTAGCCCCTGTGCCTAGTC	AACAAAAGCAAGTTTGGTTTATTTGAATGGTTTCATTAAATAAGTCTACAAAGGTAACAAACTGAAGCACAAAGCGCAATCTTACAGAAGCGCAGCCCCCGGAGTTAGTGCAAATGTACAGGTAACGGCTGCTGAGAAACCCCAAGGTTTGAATTCAGTTTTAAACAGTGTACATTGTTAAATAACGTAAGGAAAACATTTATAATTCGGAAAGTTCTTTTTAAATGTGGAAAGATACTCAAAGTGTACTATTAA	CTAGAGAGGTAGCAGATGCTGCAGAGATGGGGGTAGAGCCACCCAGGTTTGAGGTCATGGGAACACACAGCTGCCCAGGAGCAGAGAACTTCCTTGCCATTCCAGGGCCCTAAAAACAAGAAAGTAGCAATGAGAATTTGATGAAAAATGGGTGATACTATAATGCTGTTGTAGAGCTGAGATGTTCTAATCTTAGCATTATCAAAATATAACGAAGCCGCCCATATTTATTGGCTTTACCCTTAACAAGGAGGA
ENSMUSG00000093206+ENSMUSG00000001986	Gm22413,Gria3	E036	2.39e-06	-0.0923255					CATGTTAGTAAAATCCATGCATATGCTAGAAAACCACCCTAATTAATCTATTCCAAAGTACCTGCACCCAGTTGAAAATTTTAACCAGACCTATTTCCTACCAAACTGGGGGTGGAAGATGGCCCCAGTAATGGCAATTTAAGAAAACAGTCACTTTTTTTGTCCAGTGTCAACAGAGCCATTAATAAATGTCTTGGTTCCCAATAAAAGTCCATTCATACTACAATGTCCCCTTGCCTTTTGCAGATCCCTTCC	ACAAAAAATGGACATGCAAGATTCCAGTATGCGAAAAAAATTCTTATTAAAAACATTAATTCAACAAAAGCCATTCTTTGATACCACTGCACAGTATACGAAACCATGTTCGTTAACACACACACAAACACACACACACACACACACACACACACACTCACTTATGTATACACATTCACACATACAAATTTATTCTAATTCAGCAAAATAGACCCATCTTAGCTAAAAGAAATAATTCCTCCTGATTTAAAATAA	GCATTCTGTCTCTGCACTTTGACTAGCTGCTTGCTGTATACTTGATGCAGATGCCAAGAAGTCATTATTCACTAATTAACTTCTCATCTGAAGCCCAGCCAGTGCTCTAACAGCCTCCTCACTATGAGGATTGGGTTTCTCCCCATCCCAACTGCAAATCAGTCAGGGCTCAGACTCAGGGCCCTTCAGCTACACTGAGCCATCCTCCCACATTTTCCATTAGTTTGACTTGCCTTCTTTGCCCCAGCTAGCATC
ENSMUSG00000000826	Dnajc5	E020	2.56e-06	-0.117797	recognized	394			TAAATATTAAATAGAGAAACACACACACTCCCCTAACTCCTATACTGGCAGGCAGTGTAGATGGTGCTGTGCTGTGTTGCCCAGAGAGTGCTGGAATCTGTGCATGCAAGCTCATCCTGTGCAGTGGAGACCACTTCTGACCTACAGAAAGTAGTCGGGAGAGACCCTGGGGGACCCGTCTACCAAGGCTGCTGGAGTGTAGGTTTCTGTTTGTGCCCAGTGATGTCTTTCCTTGTCTTCCTTTTGACTGTATTT	AAACAAAACAAAACAAAAGAAAAAAGCCAGTGCTTACTGTGGTTAGGCAACTTTTTCCCAAGTTACTTGCTGGATTTGTTCCTGAATCATAAAGCCAGTCTCTTCAGATGTCAAGATTTAATATCAGTCAGTACCCGTTGTCCTGCTGATCCATGGTGTCTGTTACAGGTGAGCCTTGTTAAAGGAGGTGCCAGTGCTGCAGCTGGTAGACTCCAGAGAGAGTGACATAATCATTCAAGCTGCCCCTGAGGGTGT	CCTGGTTTGTCTTTTTAATTTGTATGTGTATGTGGGTTTGCTTGTATGCATATGTATACCACGTGCCTACAGTGCCTGTGGAGGCTGGAGGATGGTTCTCCTGAGACTGAAGTTATAAAATGGTTGTAAAGCATGAATAGATGCTGGGAATCAAACCCTGGTCTCTAGAAAAGCAGCCAGTGCCTTGACTGATAAGCTATTTCTTTAGCCTCTTACCCTTCATCTTAACATGGGGCTACACAGATTGATTTTCCT
ENSMUSG00000040560	Wdr7	E028	2.62e-06	-0.0823267	recognized	458	recognized	235	ATGACACCCGACATGGACCTCTCACCTCCAATCATGTGCATGTACACACACACACACTTTTCCAGAGCTTTTGAAAAGGCAGATGGGCCTAATGGTGGTTGGTAATGGAAATAGGACTTAGGGTGGGGCCCAGGCAGCTCCCACTCTATCCATAGTTTTCCTCAATCTTTCACTTTCCTCAATCAATTATAAACCAAATCCTGTCTGATAGAATGGTTTTAGTCCCAGCCCTAATTTAGCTTCTCTCCTCAGGAT	TGAACACCTCACTCCTGGGAAGCATTGGAATGCTGAACTCAGCTCCTCAGCTGCGCTGCATCAAGACCTACCAGGTCCCTCCAGTGCAGCCAGCATCCCCTGGCTCCCACAACGCCCTTAAGTTGGCCCGGCTCATCTGGACTTCCAACCGGAATGTTATCCTCATGGCCCATGATGGGAAGGAACACCGCTTCATGGTCTGACCCTGCTGGCTGCTGTCCTGACTGTCAGTCAATTCTGTATTGTCTAGGCCGA	GGTGGTTTTTATCCTGTTCTTACTGTGTGCTGTGGTCCCTCGTAAACATTCTCTGTGGAAACCCATGTGTTCCTCTTGCCCTCCTGTTTGTACCTATTCATTTCACTGGAGAGCAAGTTTCAACAAAGGCAACTATGTTTATTCTCAAAGGACAGCTGAGCAGTGGTGAAAGCTCTTGCTTGAGACCAGATGGAGAAACTCAGCAGCATCCTCTGGCCTGGGCAGGGGAGTCACATGCATGCTGCTTAACCTCCA
ENSMUSG00000020859	Spag9	E054	2.73e-06	-0.063299					CTGAACTGTAAGCTAATCCCAACTAAATGTTTGCCTTTATAAGAATTTCCATGGTCATGATGTCTCTTCACAGCAATAAAATAAAACCCTAAGACAGACATGTTGTAATACTGTCCAGCATACTATTGTGAACTAGCTTTCGTGTGTGTGTGTGTGTGTGTGTGTGTGTGTGTGTGTGTGTGTGTGTATGGCTACCCTTGGAGGCCAAAAGAGGGAGTCAGATCGCCTGGGACTGTAGTTACAGATGGCTATGAG	TGATGAAGGTGGAGAATCTGAACTTCTGGGAGAGGATCTTCCACTGGAACCTTCAGTCACCAAAGCCGAGAGGAGTCACCTGATAGTGTGGCAAGTGATGTGTGGCAATGAATGAGTCTGTGAGAGACAGACGAGGATGAGGAAGTTGCCTCTTCTGCATGGTTTATTTTCCCTTTTTCCTTTATTTAATGCTCTTTTTGTGAAAGACATTTCACCACATAATAATGTGAGCATTTTCCCCTGTTACCTTTATAT	AAACATGTGTGAAGTCTAGTGTGGTTTGTTTTTATCTTTCTTGGGGCTCTAGACTTGGTATTTATCAGAAAGTTCAATAATATGTTCCATAAAACATGTCATTTCTGAGAACCAAGATTATGGTTGTTTGGCACTGGTAAAAAGTGAGCAGATAGCCAGGCGTGGTAGCGCACGCCTTTTGATCCCAGCACTCGGGAGGCAGAGGCAGTCAGATTTCTGAGTTCAAGGCCAGCCTGGTCTACAAAATGAGCTCCA
ENSMUSG00000015501	Hivep2	E004	3.46e-06	0.0791414					AATAAGATATATAAGTATAACTTATTATAAGTTATGGAGTTTTATAATACACTTCTGCACGCAAACCATAAAACTTGGGTAGGGATAGCTCTAAGGTTTCTAATTAAGCTGTTAAAAATCATATATTATAAATATTATTGAATGACATACTGTCCTTTAAATGCTTTTTTGATGTGTCCGTTCAGTGGAACCGAAGGCCTCATAGACACTAAGCATACTGCTTTGTCACTGAGCTCTGAACCCCATATACACTTC	CCGTTGTACTTCAGTGAGACTGGCTGTTGAACTTTGCTGTAGTTGATGAGCAGAATTTCTGGGCTCTTCATCATCCCAGCCCCATCCTAGTTGAAAAAGATTCAAATGCCCTAACTTTGCACTTTGCTTTTGAAGAAGGACATTTCTAGGATGGAGAGAACTGTGTTATAGTTTGGTTCCAGGACACTGGCATCCAATGCCCACTGACTCCAGTGTGAGCGCGGAAGGTTCCAGAGAGAGGGATCAGTCCGCGAG	GTAACAACAGACCCTGGCTTAGAAAGTACGGTGGGTTGTGGGTCAGATGCTAAGTAGACTGTGAAGGATAGAATATCTAAAAGGTAAAATATAGTAGGAACATTTTTGTAACCTGCTCTTATCCAGAGATGGGAGATGCCATAGCCTGCCTTTACTCTGAGGGCTCCCAGAAAAGCTCCAAATATTGGGAGTGCTTTGTCAGCCCAGATAAGGGGAATTCTCCTGCTGGGACTAATGATTATTGGTCATTTTCCC
ENSMUSG00000053025	Sv2b	E012	4.12e-06	0.107807					GGCACTCAGCCACTAACTCTCAGTACAAGAGGAGCTGGGAGCAGATGCTATTGGATTCTTGGAAGACACATAAAGAAAACATGATGGACCAGACCTCTGGCTTACCCCTTCCAAAATGTATTGTTACTTGGATATGGAAGATGGTTTAATAGTCTGTCATTCGAGAAAACAAGATTTGGGAATCAAAGAAAGCTACGAATCAAAAAGACTTGGAAAAAAAACAAGCTATGATACTAGCTATGAAAGTTTGAGTTA	AAGCATTCCTTTCTTGGAACTGGACAGACACATGTCTTTCTCTGCACTTGGCAGAGCAAAGCTCACTACAAATATTTCCACTCCATCAGCCATCAAGGCCAAACCCAAGACGAAGAAGAGGGTCCACTGGAAGCGCCCATGGCCACACTCATCAATGATGGTCTCATATTGGTGAGCCAGCTCCTCCTCATCTTCCATCCTCTCAGCCATCAAGTCTGCCTGGCCCCCAAGACCATCTGCTCTGGAGGGCGCCAT	CTAGGAATAGAGACAGAAAAAATAGTTAGAACAGTCTGAATAGATAGACTAGTTAGAAAAGTCTGAGATTCTGACATGATCTTTGAATTAAATGAAGATATTTACTAATACTCATATTTCATGTGTAAGGTGAAGCATATTTTGGTTAGACATTTGAACTCACATAAGCTAAGTGAGGAAGGAATTGTAAGGGTAGTGAATGCAACCATGGGTAGAGAAGCTCTTTGAGCTTTGAAGAACCCGGTGAAGGTCAAA
ENSMUSG00000022016	Akap11	E001	4.5e-06	-0.073292			recognized	267	TTACTAGTAAAATCTCATTATAAACTTAACCCACACCTTCCCATTCATCAATACTTGTTTTCTCCATCTTCCTGTTGACACTGATGTAATTGTAGAGCCGTGCTACTCTGCTAATATGTCTGCTAACACCTACAACCAAGAGCTAACTTTCACATCTACCTAAGTGTCAGGTCTATGATGTCTGTAGACTACCAAGGAATGCTGAAGCCAGATGAGAAGAATTTCAGAATCATGCACACATGTTGAGGCAATGGC	TGACATTTCTTTAAATTTATTGAATAATTCTTGGCTGGGAGAGGAAAGATCACAGGCTTGAACAAGAGTAAAGACAAAAGAACAATTAACTGCAAATTATTACAAAAGTAAGTTCTGAAACATTTTTTGAGCCACCGCTAAATAAAACTTTAGTGCATCTTGAAATTCCAAGTTTGGTAAATGAACATTAAATTACTCAAGAGCAAAAAGAGGAGTTACTGTTATATAGTATAAGACCTTAGTGCACTAAATGAG	CTAAGAAAGAAGGATTAACAGAAACATTAGCACACATTAACAGAAAATCATTTCAGGCAACAAAATTTTTGTTTTTATCTTTAGACAAAGCTGGAAATCCTGCTGTTTACCATGAAATATTCTTTCCCAGTTATGAGATATCCCCTCAACCACCAGCCCTTTGCCCAAATTAAACATTTTCCTTTCTTAACCTTCAGAAACACATCTCCACAGAATGACACTTCAGGATTGCTAGAAACAGAACCCAAATCTTGG
ENSMUSG00000026103	Gls	E015	4.86e-06	-0.265311					ATAGAACAGCTCTGAAAGGTAGACTTCAGTCAGCCGACTCCATATGCACTCTACTGTACTGAGAACAACAATGTTATCCTGAGCAAAGCAATACATCTTACTGATTTGGCAGTGGTTTCCCCTACTATTTAAACAGCAAATGTCATCAGTTACATTCTCCCTCAGAAGCAGAAACGGCCTGCAAATAGAATAAGGTGTTTTCTTGTTTCTTTTCCTTTCTTTTTTATGTGACTAGGGGCAGGTCGGTCAAGTCTT	CAGCTTAAAATAAATTTATTGTACAATACAAAAAATAGGCATACTGGAAAATAAAGATACATTATTAAATATACAAAGCAAATGAAGAAAGCTCAACAACACAAATGTTTTAATCCAAACACTAAGATAAAATGCACAACATTTATGCTAAAAACAAAATATTTCAAGAAGAGTATGCATTTCAAATGAAATGTTAATGATAGCAAAAAAAAATAAACAGAAAAAAGGAAAAGAAAAAAATACGCTGTCATGTAA	CTACAGTTGTAGAGGTGTCGTCACTTGACTCAGGTGACACTTTTTTCCATACTGTGTCTTTTAAAGCAAGTTCTTGCTGGAGACTCTCATAGTCCAATGGTCCAAAGGAATGCTAGTTGTTCAAGCAACATACACAATTTATTAGTGCACTTGAGTGATGAAAGGTCCAAGCTATAAAATGTATTTTTCAATGAAAGTTATTAAGATCAGTTAACATCTTCACCCATCATCGTCTGACATCTTGACATGCTACTC
ENSMUSG00000023033	Scn8a	E035	4.97e-06	-0.057021					TAGAAATCTGGTGGAGAATATTTGAGAGCTGCATATGCACGTGCTGAAAAAGTGGATCCTTGAGCAGGAAAGGAAAGATCTGCTTTGTTTTAGCCATAGGAAGGGATAATGCAAAAGCCATTTTTATCTGAGGAACCAGTCTTGCAGACAAAACCGATTAACATCTTAAATATAGAGATACAGAAAGATAGCCCTGTGCCATTTCCTAAATGTAGAGGACACCTTGTTAATGAATTCACACGTAGTAAAACTAGA	AATGTTCCTGGCTGATATCATTGAGAAGTACTTCGTCTCCCCGACCCTATTCCGCGTCATCCGATTGGCCCGCATCGGGCGCATCTTGCGTCTGATCAAGGGCGCCAAAGGGATCCGCACCCTGCTCTTTGCCTTAATGATGTCGCTGCCCGCCCTGTTCAACATCGGCCTCCTGCTCTTCCTGGTCATGTTCATCTTCTCCATCTTTGGGATGTCCAACTTCGCGTACGTGAAGCACGAGGCCGGCATTGATGA	CTCTTGGAATGGCCTGTCATTCTGTCATGGCTCTCTCGCTCCAGGCCCCTAACTCTAGGATTCCCTGGCAACAGACACTCCGGGGTTTGGTTTCCAGGTAGGGCTGACTCGTCCCTCAGAGGTGGGTGGGAAAGTGGCCCGAATGACTGAGTGGTGCTATGCGCGGGCACGCGGCCTTGCAAGTCACACAACTCCAGTTCAAGAGGCCAACTGTGACTCTAAGGAGTAGGGAGCAGTTTCCTGGTACACAGCAGA
ENSMUSG00000009569	Mkl2	E024	5.17e-06	-0.10306					GAAGGCAAGGGGCCTCCAGCCAGTGGCTTCACAGCCAACTCCCTCACAGCATTCCTTGCCCTAGTCCCCTGGCTTGAGCATCCTGTAGGTACATGTGACACCAGTGACGTGAGCGACACTTGATAGACCTCTCGCACATGTTCTGGACAAATGTGGGCATCTTTCCCATAGGCTCACATCAATGTGTCATGACCAAAGACCGCTCTATAAAAAGGCCTCTTGACCTAGTCCCAGACCGCAGTGAGTGCATTGGAA	ACTTGCATGTACAGGGTACACGTGTAGTGTAGGCTTCTGTTTGTATCACATTGCCAAGAAAATTCCTCTTAGAAGCCTGGAGTGTCGCAGTAGAGTCCAACCCCAGTCTCCCTCTTCTGCAGCATCCACAGTGTGGTGGTGTCAACTTTACTTTCTGAGGCACAGACTGCCAGTTGTCTTACTGTGGTAGGAGGAGTGGAAATAATTACACCGTGGCTTCTAGAAAGCTGATGTGGCTGTGAAATTTCAGCAAGG	TTTTGTGTGTACAGAGAAATACACTGTAGGTGCTGTAGACTTGTGAGATGGAGCAGCCTCTGGCAGGACAGCATCTTCAGAATAACTCCCAGCCAAACAGCAAGAGGGCCAGCAGAAAGTAGGCTGTTCACCTCATGTCCTCACACAACAGAAGCTCATTGGTGCCCACTAGCCTCAGCCTGACTCTCCAGACATGTTCTGTTCTCCACAGAATCGGGAACCACTGAGTAAGAGACATTAAACTATGTGGTCCTT
ENSMUSG00000053580	Tanc2	E043	5.43e-06	-0.0795159					TCAGCTCTAGAATCTTCATTTCCTTTATTGCTGGTCCTTCTCTGGGACAAAGGGGTCTAGGGAGAGTGAGAGAGAAAGAGTAAGAGAGGAAGAAAGAAAGAAAGAAAGAAAGAAAGAAAGAAAGAAAGAAAGAAAGAAAGAAAGAAAGAAAGAAAGAAAGAAAGAAAGAAAGAAAAAGAAAGAAAGAAACGCTAAATTGATTGGAAGAAAAGCCCACTATAATTATCTGAAATGTTACTATGTTGGTTTTCCAAG	CAAAAAAAAACCCTGAACAACCTCTGAGGTCTGGCTGCTGTAGTAACCCGACTCGATGCACTTTCACCTGGAGCCAGGCTTCGCTCAGCTCCATTGTCTCAAAACCAAGATGATAGTGTAAAGAGTTTCTTCCAGAACCTGCTTAGGTTCTCTTGGGACTGTAAGGCCCATCCCAGGGTTTCCACCCAGGCCACTACATTCCGTGTTGGCTGTTATCTAATTCCATTTTAAGACCTCTGATTTCATTATTCTCTG	CCTGGTGTCTGCTGCTTTTCTCCTTCCTTGCTCTATCCAGGGAGCTGACTTCCATGCTCACCCCTAACTGAAAGGGCAGTGCTGAGGATGCCCACCCCCCCCCCCCAAGGGAGAACACCAAGGTCAAGGCTACAGCCAGATTCCTGATGACTTGTTTGCTCTGCTGTGAGAGGCGCGGAAGCATGCCTCCCTGTGTCTCTTCCAAGTTGTGTGTCTCCTCTGAGGTGGACACTGATCACATGCACTTGAGGGAGC
ENSMUSG00000026833	Olfm1	E009	8.3e-06	0.0643003					CCATCCGCACACTGGAAGATGGCCCTTCCCAGTCACCTTGAGAGACAGTTGTCCTTGCAGACAGAAGCTCCCCAGTGTGTGAGCATCTACCTAGCAGCTGTACTCTCTGCAACACTGATTCTAGCATCGAGTCCCCGAGTTGATGACACTCCTTTCTCTCAATCCCTTGGCCAAGATCCAACAGTGAGCAAAAAGACATGGCCATTGTCCTATAACATGGTGCTATCCTAAGTAGTGAGGGCTCCATCTGGGGAC	TCTGGTACATGGATGGTTATCACAACAACCGCTTCGTCCGTGAGTACAAGTCCATGGTGGACTTCATGAACACGGACAACTTTACCTCTCACCGTCTCCCACACCCCTGGTCAGGTACGGGCCAGGTGGTCTACAATGGCTCCATCTATTTCAACAAATTCCAGAGTCACATTATCATTAGGTTTGACCTGAAGACAGAGACGATTCTGAAGACGCGCAGCCTGGACTATGCTGGCTACAACAATATGTATCACT	AAAGAAAAAAAAAATCAGTGTTCGCCCTTATAGGAGACATAGTCAAGTTCATGTTGATAATAACCCAGTGGAACTCTTATCTTGTCAAGGTATCTGAATTGTGTAACCATGGATGGGAAGGACGCATCGTGGGAAACTTCCGTTTCCTACAGGAAGGAACTCCCCAAGGGCAGCCATGTGTGGAAAGATCATTTTTTAAAGAAATAAATAAGTCAAAGAGGGCAACTTTGTACTGTTCAGTTATCTAAGGAACAA
ENSMUSG00000027993	Trim2	E003	8.63e-06	-0.119296					GACACACACACTTACCATCAAGCTACCAGACACTGAACTCCCAGAGGACCGTTTGACCTATTCTCTAGATGGTTCTGTGGCTTGAAGTACATATCTGGCCATTTGATATAATACAGAATAATACAGAATTCTTTACCATGATGAACTCTGTGTCACTATATTCTTGATCCAAGAAGTACTAGTTGTAGTGAGGTCCCTCTTGGGTCCCTGCCCCTAGTAGTGTCTGCCATGGCCAGCAGAAGGCCATCTGATCTT	AGGTGGAGAGAACAAGCTTTATTATAATGATCTGAGACTTTTGTGCATGGTAACGATATACACTCGAGTCTTGTTTCTCCTGTGTTTCAAGACAGAATTAATTTAAAGTTTTATAGACTAAAGCATCCAAAATACTGTGGTACGGATGTAGCTACGAACATACAAACACACTGATGCACGGCGTCCGTTCTTCTATTTAAACAGGCAGTCAGCATTTCAATTCATAAAAGAACATATGAGGAGGCTATATCATTA	CTATCGTTAACCTATAAAACCTAACTGCTTGTCCTTAGTGCCCAAGGGAAAGCTGAACGCTTACTTTCTCAGTGCTACGTATCATGAATGTGTGACGGGTTCTATACACTCAACGAAGATCAATTGGACAGTAACAGTAGCCTAGAACAAAAAAAGCCACTTATTGTAATAATCCTTCTCAGTTTACCAGAAACCATTCTGACCAAATGAGACAAAATTCCATTTAGACCTTGTCTATTTATATCTTAGTAGCAG
ENSMUSG00000055022	Cntn1	E028	8.63e-06	-0.0856843	recognized	256	recognized	301	CCTGCTCAGAGGATGCTCTTCATCATGGGATGACTGTAATTCCTTCTAATCCCTGCGGCTCCATCCTAAGCCAAACAAATTAGACTCTAACAAGCTGTTCAACTGATTTCCCAACACATCACGACTGAGGCATTCAGGAACCCCTTCATCCAAAAGAATAACTTTCAAGTGGAAATAAAGTGATTTTTAACTCGTTCCAATATGCCTTATAAACCATTTAACCTGATTCTGTGAAAGTTGCATGACTTAAATCAA	AGAAAAAAAATCATTTTGACATAAACACCATTACCAAATCACTTTACTGAATGAGTTGGAAGTTTTTGACTATGAAAACCAAATTATAGAACTTACTATTATCAGTATTCTTATTTTTGATGTAATTTTCTACACATTTGCTTTTCAGAATCCCTAATACTCTTCAGTTAGTTTTCTAATGCTGACGTTCCCATGCCACGTGAGGATTTTTTTTTTTTTTTTTACTTTTGTATTCTAATCTGAAATTGTTTTGTG	GTAACTGTCCCTTCAATTTACCTGAAGTTGATATTTGCTTTCTGCTTGTATGTTTGTATGGTTTTGTTTTTGTTGGTTTGGTTTGGTTTAGAAAATTTTTATGAGCATGGAGTCAAGGAGTAGATTCTCCTGGGGGTAAAAATTCAGAGTTGGATGAGTTCAGCATACAAAGGCTACACAGGGCTTGGAGATAATGGCTGAGTTAACACTGCTTACTACACCTTTATCATGCATCTCGCTGACTGCTATAACTCC
ENSMUSG00000066392	Nrxn3	E031	1.11e-05	-0.604548			recognized	120	TGCTGCGAGAACAGCCGGGCGCCTACCACAGGCAGTCCGGTGTGCTTGCAGACTCAGGGTTTATTTTGGTTTAGGGACACTTGGGCTGGAGGTATATTCCTGCCAAAAGCTTCACTGGTGCCTTAGTCGCCGAGTTGGGTTTAGGGATCTTAGGAGAGGAACGGGAAGGGAGATCCCCGGGGCCCTGAGCAGAGGAGGGCTGTGGGTCTCCTAGGCGCACGCACAGCGGGGTGGAATCGAGGGAGAGCAAGGCGA	CTTTGCTGGTACCGGCTCTGCTCTCGGCCACCTCTGTCATCCGCGAGCCACCTCCTCTAGCGCTCTCCCTGATTGCGCCTACCCTGCTCCTCTCCACCTTCTGCTACGTTGGTCTGGGTGGCTAGCTCAGTGCTGTTTCTTTTCCTCTGGCCCTTCTTGATCCCTTTCTCTGGCTACTGCTGCTGGCTGATTTTCAACCTATTGGGAACTCAGGACTTAAGGCGGCTGCACCGTGGCGCTCATCCAGGACACTCA	GTGGGTCTCTCTGCTCTTTATCTTTTACTGGGTCATTGCAAATCTTTAACCCACTGTCTTTCAGGTAGATTCCAGGATGGGAATAGCAGAAAAAATTCAATTTAAAATTATGAGATGGCTTGCATGTGCATAAGGGGAAAATTGTCACTTTCTCTTACAGGCAAATGCTGCTTGCTCTCAGCCATTCACTTTCCAATAAAAGGCTCTCCCCTCCTTGGCACTCTTGCTCATGGCAGGGCAAACACACTTTCTACC
ENSMUSG00000031229	Atrx	E047	1.17e-05	0.135306					TTTTTGGCTGAAGTTCTTTGTTTCTTCTGCTTTTTATTATCTTCTGAGCTTCCCTCAGCATCAGAAGAGGATGAAGCACTCTTTACTTCCTTGGTATTTCTCTTTGAACTGGAGTTTCTTCTTTCTCTCAAGTCAATTCTTTTCGGTCTCTTTTCAGTGGAGTCACAACACTGTCCTTTCAAGGATTTCTCAGTATCTGACGATGAACACTCTGGCCTCTTCCCTGGACTCTTTGCAGGCAAGCTGAATCGTTTC	CCACTCCTGCTCTCGCTTCAGTGTTTCTCCCTTTAAGTCTGGGGCTTTCTTTCCTTTTGTTCCAGGTCTCTGTCTGCTCTGCTTCTTTTCGCCTTCAGAAGACTCATCGCTCTGCTCTTTCTTTGGAAATCGATCAGTGCCATCAGATGACCCACCCTTTCCTTTTCTACTTTGTCTGCTTCTCAGATGTTTAGTCTTTTCTTTAGTCTTAGAGACTCTTTTGTCTTCAGGGGAATTCACGTTCTCCTCTTTCAC	GTACATCATCCAAAGCTTGGATCTCTGAATTCAAATCTTCTTCTAATGCAAGATGAGCCTTCTTGATATCATCCAACACAGATTTAAAAGACTTAAGTTGACATAACTTCATAGCAGAAGTCATTTCTGAATTATCTGCTGCCTGTTTTAGAAACTTAATGTAACTGGAGTTCATGTTGGATGTAGTCTCAATCAGTTTTGTTGTCTTCTTAATCATCTCTTTGGGCACAGATAGTGCTGAGTGAGAGTAAGTGG
ENSMUSG00000015222	Map2	E041	1.27e-05	0.114776					TGGAAGTTTCACTCTTCCCTTAGACACTATGAAGAATGAGAGAGTCTCAGAAGGACCACGACCCTTTGCCCCTGTCTTCTTCCAATCAGATGACAAAGTGTCTCTGCAGGACCCCAGTGCTCTAGCTACTTCCAAAGAGAGTTCTAAAGATGAGGAGCCACTGAAAGATAAAGCAGACAAAGTGGCAGATGTTTCCATCTCAGAAGTTACCACTTTACTGGGAAATGTTCATAGTCCAGTTGTGGAAGGCTATGT	GCCAAGAACACACGATTGATGAGTTAAAACAAGACTCCTTCCCTATAAGTCTGGAACAAGCAGTTACAGATGCAGCCATGACCTCCAAGACCTTGGGAAAAGTTACATCTGAGCCAGAGGCAGTAAGTGAAAGGAGAGAAATCCAGGGACTTTTTGAAGAGAAAACAGCTGACAAAAATAAGCTTGAAGGCGCTGGATCTGCGACAATAGCCGAGGTTGAGATGCCGTTTTATGAAGATAAATCAGGGATGTCTA	AAGAAGATAAAGCAGAGCAAGCAAAAGTGACTGGAGGGCAAACTATCCAAGTTGAAACATCCTCAGAGTCACCCTTTCCAGCCAAAGAATATTACAAAAATGGTACTGTCATGGCCCCTGACCTGCCCGAGATGCTAGATCTGGCAGGAACCAGGTCCAGATTAGCTTCTGTGAGTGCAGATGCTGAGGTTGCCAGGAGGAAATCAGTCCCATCAGAGGCTATGCTTGCAGAGAGTAGTACCAGTTTGCCACCTG
ENSMUSG00000030655	Smg1	E001	2.04e-05	-0.138577					CTAACCTTCCAAATGGCTCAGAGGTTACAAACACCTCTTTTTCTACCACAAAGTGACCTTTTGAAATGTGTCAGAAGATGAAGCTCGTAACACAAATCTTCCTCAGAACTTTGGCACTGCAAATGAAGAAGATCTTTGCAAATACTCTTCTTCTTTCAGAGCTTTCACTCACAATTAAGGCTCTGCAGTTTTGTTTTAAATATTGCTAAAATTAAGCTTCATGCATTTTCTGTGTAATCCTGGCTGTCCTGAAAC	TATCTTTTTAAGACTTGAACCTTTATTTTTATTTTTTTGAAAAACAGGTATTTCATACAATCTTTACCATGTTAATGTAAAGTAGGCAGGTGTTTTTGTTTTTCAAATGATGCATTATGGACATTTTCAGGAAGCTGGTGTTATTTATTCAACTTTTAATCTTAAATACAAGCACAAAATTATATCCATCAGGAGGCATTACAACTTAAAAATAAGCCACTATTTGTACAATGTTACTAAGACAAGGAAGATTCA	TGTGCTATTCTGTGTTGATACGTGATTTTTAGCTCTATTCTAGTCTGCACTTCTACCAAGGATCAGCAGTGAGTACTGAAAATGCTAAGCTGAAGGATGCCTTGATCGTGACTCACTACACACTAGTCACTAAACAAGCTATAAAATGTTGCAAAAGGTAAACAGAACCCATCACAGGCCACCAGCTGAAATTAAAGGTGCTGCTGGCAGGCATTACTGAGCATACCCAAATGCCAGGTAAACTAAAGCATTTTT
ENSMUSG00000054280+ENSMUSG00000023452+ENSMUSG00000093574	Prr14l,Pisd,Gm20671	E036	2.33e-05	0.244784	recognized	217			GTATTCGGTCACCTCCAGCAAAGCTGGGGTCATGTTCTTTCCAGGAGGCACCAGGAAGGCAAGTACCTGTGCATAACTCAGTGTCTTTCTTTAATGAATGACATAAGCTTTCTTCTTTTGGGTATTTCAACCACTGAAGCTGTCTAGCAATTCTGTCCTTGGATGGCTTTCTTAGGGTGATTGCTCCTATCAGGATGGACTCATCTTGGTCAGCCACAGGTTGCTTATCCTGCACCTCATCTGACACTGTGCCTG	ATTGCTGTTTCCATTGTCATAGGCAAATGTTTATCAATGGAATTCTTAAGAGAGTGACAAGTTTTGCAAACCTTTTTGTTGACACTGATGTATGTGCTATCTCCTTCACTAGGGTTATGTAAATCCATTGGTATTCCTGCCTTCATGTCAGAAAGGACTGTGCAATCCTTGACATTTTCACAAAGCATTTCATCATCTTTGGGTTTAAAGTGATGTTTTGAGTTAGGCATTTCATCAAAAATACCAGCTGGTGAA	CTGGTAATGACAAACAAAGGACAAATTAGTAATTCTCCATTTATTTTTGTTTAAGAGTTGCTTTTGTCCACAAAGGTTACAGGTTCTGTGGTAATGAAAGCTATGTTTTCCCAAAACTCATTGCTGGTCATGCTCCTATCTACTCCTGGATGTGCACTGCTCCCAGCTGTCAGATGTTGTCTCACAGTGCCACCTAGCATCCTTCATTACCGTCCCCTTACTACCACCCCCTTGGTTCCTCTGGCTTTCATACCT
ENSMUSG00000094483+ENSMUSG00000092885	Purb,Gm22123	E001	2.6e-05	-0.0628753					TCCAGAAGTCTATGGTGTGCTCCAGGAGTCAAATGGAATGGTGTCATTACTCTGACAGTGGATCATATGTATGACTGTCTTAAGAAACCTCCCATTTCTAGTATGATAGGTACCCATGGCTATATCCCAGAAAGATTCCCTTGGATATGGATACAGCAGTTCCTGAAACAAAGAGACTGAGACTCTCTGGCCAAGACCACTGAGCACCATCTTCTTGTTTTCCCTCTAGCATTTGGGCAAGAGAAGACTGGCCTA	GTCATTCACTTTTCCGCATACTTTATTTGTTACAAACATACAATTTTTTAAATATAGACTGTAAAACTCCATTTGCAAAAGTCTGCTATTGGAAGGAGTGCACACCAGCAGGAAGGATTCTTAACTTTATTTCTATGAGTTTTTCTGTCAGTTTTGCTAGTTAGTGGTAAATACGGGACCCGCCATTTTACAGACCTGTCTGAAGCTTCTGGCTGTATTCACATTGCTCTTTGAAGCAGCCCTGCTTGTCTCACA	ATATGGTAGTGTTCTTGGCATATACTCTATATGCCTCAGACCACTTCCACATTCTTTCTATTCAGCTAATTATAGCTTAGTAGCCACTGGTGAAGGATTGTGAAGACCCTGTCATTTCTACAGAATAGAAAGGCAAGGCTAGTTACTGCAATTCAGCCAAATAAAAAGAAAAGAGAAAAACAAAAAACAAAAACCAACCCCTTGAAAAGGAGAGGTACTGCACCTTTGCAAAATTGAACTGGCTCACTGCAGCTG
ENSMUSG00000026585	Kifap3	E021	2.66e-05	-0.0893748					CAGATCAACTCTGGCTGGTTTGCAGGCTGTATAGAGTGCTCTCTTGTTCTTTGAAGCTCATGGACTTAGATGTGTTGGGAGTTCGCTGCTGACACTCAGATTGCGTATCTTATTAATCGGGGCTTAGTCTATTCCACAAGACAGAGACCATGTAATAGTCAGCAAACTCTAGCCAGTGTCGCCATTTCCTAGTGGAGTAACGCTGCTCATTGCTTGAATGTGATTTTTTTTCCTATTCTTTCATAAAGCCATGTT	CTCGGGATGGATGGCTTCGGGCAGCCACTGGGGATCCTTGGACGTCCTGCCACCGCGTATGGATTCCGCCCTGACGAACCTTACTACTACAGCTTTGGGTCTCGATAAAATCACCCCTCCCATGTGGACACTCAGCTTAGGAGAGATCTGTGTGCTGTGGGTTAACCTTGAATCTTGACTTAATAATGCATGTTATACTCCTATGGGGCTGTGTTGCTTATTTCTCCACGTTGTTAGCTTCAGGTTAACTCTAAC	GTCCAACTCTCATTTTTATGATTAAAAAGAAAAATCTATGATGAGAGCCAGTGGGATGTAGGTAAGTAAAGTCACTGGTCACCAAGCTTGAAGACCGGAGTTCAAGTCCCAGTACCTACATGGTCAAAGGAGCTAGCCAATGGCTGCACATTGTCCTCCAACCCTCACCTACTCACTGTGATATATATGCACCCTACACAATGTCCTCTAAGCTGCACCCACACACTGTGATATAGATGAATCCCTACACATGCA
ENSMUSG00000035864	Syt1	E002	2.66e-05	-0.0396496					AGCATGCGTATCACAGCGCAGTATCTATCAGCCTCAGAATGGTACATGGAGGCACCACACTGATGTTAAATGAAGGTAGGAAAGCCATTCAGTTGCTTCAAATCCTCTTAGCAGCCATGGGCTTTACTATCCTGTCTATCCCCTAAAGATACACTTAAAACAATTTGATTTTAGTTTCCTTCTGGGGACGTGTGTGTTAGCTCGGCATCGAAGTGAAATCCCTCAAGTACACATTTTAGGCAAACTGAGAAGTTC	ACAGGAAATAAAACATTTTTATTGAGTGTCCATGTAATATGTTAAGTCATTTTTTTTAACAACGATCAGAAAACTACCATGGGGTTCACTACACAAAGTGAAACAGAATTTAAACCACTTATCAAAAAATGAAGGAAGAATACAGCTAAAGGAGTTGGCTCGCGGGCCACGAGCCCTTATGGCAGAAGAAAACACCCCAACATTTCTACGAGACACAGAGAGAACCCACACAGAGAAACACTCAAGCAGGCAGTA	CTGAAAGAGGACACAAGAATGCACCAGTGTCAGCCAGCCCTCTGGGTAAAGCCCTGGGACCCACAGAACTTCCTTGGGATCTGAGGAACAACGAAGAATCCGTTCCTGACCCACCAAGACAGGGCTGAGAGCGCTAGAGTATGGAGACCTTTCCACTGATCTAGATCTCCATTATCAGCGTTATTACTGCCACCATCATTGTCACTGCCACCTTAACACCTTTCATGCAGGTTGCTGGAGGCAGTGTCTCATGGA
ENSMUSG00000066392	Nrxn3	E046	2.66e-05	-0.123762	recognized	2	recognized	13	AAATACCCTTATCTGGTTCTGACCAGTGTGTGTGTAACTTTCCAAGATCTGAGGGGAAAATAGCTTTTGGGTTTTCATTTATTTTTTTGACAAAGACTGCACATAAGAAGAAAAGGAAAAAAATATACTCAGAAAAAAAGTATGAGACTCTTGCCATATGAACTCAAAATCTACCATGGCATTCACTCCATGTAGCAGGTTGTGGTGTCTCTAGAACCAATTGTTAGTTTCCTAATGCTTTGGTGAACCCATGTG	AACAAAGAAAAAAAAAAACCCACAAAAAAGAAAAGACAATGTTAGCATCTGTTTCAACAGACTGCAAGGGAGTTCCTAACTTGTAACACAACCACAAGTGGTCACACAAGCCTAGTCATGGCCAAGTGTGAAAAATCATAGTTACTTCCCCACCCCCAACATAATAACGGTTTCCATATGGTTTAACTTTGTAGCCTGATGTGAGTAAATCCTTCCCATCTCCTCATGTCTCCTTCCGCCCATCTTTTTTTTTTA	CCCTGTGTGATGGTGCATGTTTATTTTCTTAAAGTTGGTAAAAAATTTTGGGCACAGAGCTAAGTACATCATATTTTATTACAAGTCGAGAAAACTAGAACCACGTTCATGTGCTATAGGCTGTCCTGACCACGTTATTAATGCCAGAGTGATCCAAAGGGCATATTCACGAGATGAGCTAATCCCCAGTCTACCTGAGGTCTTTGGGTTCAGATTGCTGTGATGGACAAAGATGAGGAGAAGGTGCATTCCAGA
ENSMUSG00000020315	Sptbn1	E005	2.73e-05	-0.29085					TCAGACTGGATGGCAGGCCCTTTACCAACTAAGCCATCTTACACGTCCCCACGCCCTTTTCCAGAGTTACCTCTCCTGGTGGAAGGGGCCTTTTAAAATGTAAATTGCTGCACATGTTATGATCACTGAGGTGACCCTCTCTTCTCCAAGGAGGTGAGGCTAATGGTAATGGAGTACAGTGTAGAGGCTTTGGACTGGGCATCAGGACATATACTCAGACTTGGGCCACCTCTCTGTGCCTTGCTCTAAGGAGCA	TGTAATTTCAAGAAAATTACATTTTATAATTATGTAGGTAACAATTTCATATTAGAAAGTTAAAAAATATAAATTAAAAATACAGGCCAGGTATGGTGGTGTACATCTTTAATTCCAGTACTCCGGAGGCAGAGGTAGGTGGATCTCTGTGAGTTTGAGGCAAGCCTGGTCTATAGCTTGATTTTCAAAATAGCCAGGCACAGAGGAACTTTGTCTCAAAAAGCAAAACAGAACAAACAAAACAAAACAAACCCA	CTTAGCTTGAACACGTGCTTCTTCTTTTTGTAATCAAGGGCCACTTCGCAGATGGCCTCTTTCAAACTCACAGGGACCTCACTGTGGTAGGGGATGCCAGAAGCAGCACTCTTGGCATCTTTATAGAAGCCCATTTCTTGGTTATTTATGACACAATATACATTGTGCCAGGACCTGAGTGGGTACAGCAGAGAAAGAAGTATTAAGGCTCTGCGCTCACCTTTGCTGAAAGATCTTCACAAACAGGCTACCCCT
ENSMUSG00000021027+ENSMUSG00000092949	Ralgapa1,Gm23394	E001	2.73e-05	-0.130422	recognized	183	recognized	281	GTTACCAGTTATCAATCCAACAGAAATATGTAAGGAGTTAAATTTGATTTTTCCTTTGGAAACTTCTTTCTGTTGGCTGCAGGGAAACTCTCTACAGTGTTTAATCACATTCCTACAGGCTGTCTTTTCTCATTTGATTGTTTTTATTTATAAGATTAATTTCCATAAAAAAGTACACAGGAACTCTAAATATTTGCTTAGAAAAAATTGGTAGAAAATTCTATTCCTGAAAATATATTTAAAAACACTGAAAAT	AATACCATGTCATCTTTTTGTCCCATTACAAATCTGTAGACACTACATGAATGATACATAATTTATATTCTGTGGTTTGTCAGGATGATATATTTACACATGCAGTTGGTATCAATCATGCTACATTTCCTTAGGAGATGCCCATGTTAAACAAAAGGAGACTGCTTATTTACTACAGGAAATACTTCTGGAGGTGGGGTGCATACCAACCTGCACCTGCAGCCAAGTTTAGTACTAAAATATTATATTTAACTT	CTGCAGGAAAGAGGGAGCACGTTAGGATTCTTCCACTTCTCACACCAGAACAACCTTTCTGCTGCTAATCTGAAGCAGGATTCCAACCCTTTGTAAGGACTTTAGAGGTAAAAAAAAAAAAAAATTAAGTCCTAGACTTGCTGTTCCCCAAAGCTTACTAAAACCCTGTGATCTGGTGACTCATGCCATCATATTAAAGAAAGCACCAGTCATCGGGTCCTGGAAAAAGCAACTGGAAATACAATCTTTGGGCCT
ENSMUSG00000025576	Rbfox3	E006	2.73e-05	0.807258					GAGGAGATGGGGTTTGATGGGACTTACAGCTTTGGTCACTTTGTGGCCCTGAACCCCCAGAGTGGAGGGATTAACATCTGCTAGTTCTCTAGGCTTTCAGCCTGACTTCAGGGACTCTAGGCAGTGGAGCTAGGTGGGTCCCCACAGGCCACAGAGGCACACACATGCTAACTGAGGCTTGGGTGGCTGCAGGGAGACCAGAGGAAGGAAGGTGATACTGTGTCCCAGGCCTGACTACTGGAACCCTGGCCTTTC	ATGGTTAGTAAACTTTAATAGAAACGATAACTTCGGCTGAGTGGAAGTCCAGAGAGGGCATGCAGTTACTCTTGACAGTCTCTGTGAAAGGTGGGTGGAAGTCCCTCCCACTGGGAGGACCCCACTGACTAGGCCTGGAACTCCTCTGTCAGCCAGCAAACCCGGGATGGCCAGACCTGCCGGAGCTGACTGAGGTGGCTCTGAGGGAGGCTTGGCCTGGCACTTCTGGAGCCCTGAGGGGCCGTGGTGCCCTGA	CTGCAACATCAAAGATGAAAAACAGCCAATCAGTACCAGCTTTTGGCATCGGGAGGAAAAAATCAAAAAGAAAAAAAAATAAGGAAAAAAGAAAGAAAAAGAAAGAAAGAAAGAAAAAGAAATAGCTAAATCCCGATTTCTTTCCCCCAACGGTAGGTATTTCTTTGGGAAGAGTGGGCTTCAGGTTGTCATGGCAACCCAAGGGCCTAGTCCCTCTGTGGTGGTGGTCTGGGGGCTGGGAGGGATACTCCTTTC
ENSMUSG00000049583	Grm5	E012	2.73e-05	-0.0749545			recognized	429	CAATACCAAGTGCTTTGCTCCGAGGCAGCAACAGTGTGAAGCAACATCCCGAACAGTAAAAAGTGGAGTTAATAAGCAACTGTGGACAGTCTTGTTTGTTTACTTCATTTTCCCAGAAGAGTCTTTGATTCACCAAACATTGAATGTACATTTTCTAACTAACTCAAAAAAATCTGGGACCAAAAAGTCAACCTTTCTGTTTTGTTTTTTTTTTCCTTTTTTCTTTTTTCTTTCCTTCCCTGGTCCCTCCATTCA	AAAAACAAAAACAAAAACAAACAAAAAAACAAAACAAAAAACAAAAAATATTTTCTGGAACACTGTTTTTTAATTCCCTCACTGGGGTGCATTGTGTAGCTGGAAATTCTCTTTGTAATAATAATTTGTGAGCTATAGCCTGGCTCTCTTTCATGATACACAGGCACTCCTCCTTATAAATACCCTTCCGTTAGTGTTGCAAGCTCAAATAGTAAGATACGCAATGAGCTTCCTTGTTTCTTTATTTGAGAACCT	CTTCAAGCTTATTCCCCTTCAAATGCTTAAAATGTTGTCCTAGTGGTGCTTCCTGAGAATGCTATAGCCTTGTTATAACTTAAGTTCTGAATTATACATACATTTGAAATATGATCACTGAATAATAAATTAAAATAAATCAACCACAACCTAAGCAGAGATACTGTTCCACCCAAAGACCTCTACATATACCTTTTAATATGTAAGTAATTACTTTTTAAAAACATCAAGGGAACCTCTGATTTTTTTTTTTTT
ENSMUSG00000068373	D430041D05Rik	E001	3.06e-05	-0.0812352					TCATGCACCGAGTCACATTCTAGGAGCTGGTCCACCTATGTGTCTGTAGGCCCTGTCTTGTAGTCAACCAAAAGGCAAAGGGCAGAGCAGGCAAGATCCCCCCCCCCCCCAATCTCTGTGTAGGGCTCACACAAGGCAGGCTTTATGGCTTGATTATTGGAAGCCAATCTCCCAAGATCATTGCTGTTGGGACTCATCAGGACCCCTTGACCTTAATGGAACTCCATTCTGTTCTAAGAAAACACACCCTAACAG	TTTGGGGGGTATGAAAGCCTTTGTCATTTTATTTTACAATAAAAAAATTCTAACAGCATATGAACACTCTGTTCCCGGCAGAGGCAAAGGACATACAAAGTTAATTAGAAAGCAAAGCAACGGAGTAACGACAGCTACAGTCAAAGCTTCCACTCGGTACTTTGCCCAGTGCATCTAAAGTGGTTTGAGAGAATCACAGTCTGGGCTTTTCCCACCCAGAGTCAAAGCACGCGTGGAAACACAGACCCCCCAAAC	ACAAAAATACATTTTATTTATAGCTGATTTCTTATTAAGTAACAAAAGACTAAGACTATGAAAGATCAACCAGCATACTAAAAGGGCGCTCGCTACCTAACATCATCCCCACAAGAGACTTGTCTGGGGATTCCACAACATTATCATCTCTGAACATTCCAGAAAGGACAGTTTGCCATAGGGAAATAAAAACAGCTTCTTGGGAAAGTTCTGTGCTTTGACAGTTTGAATCTCCCATTCTAATCAGTTCCAATC
ENSMUSG00000058690	Ccser2	E001	3.63e-05	-0.0596045	recognized	378			AAATGTACATACGTACACATATAAATCTATACTTTAGATCAATGCAATGGTATTATCTTTGTGTCAGTTTTTCATGGCTTATCTGATTAGGAGATACAAATTATACGTTCCCTATTTGCATGCCAAGTTTTATTAAACAGGTTTTTTCATTGAAGGGATTTTGTATATATGTACTGTTTAAAAATGACTGAAAAATTAACGTGACATTTTTTTTCCTTGCATAGCTTTGTAACTGAGGTAGTTTCTTCAGACTAT	ACTTTTATAATTATGAACTTTATTTTTTATTTACTAAGCCAACACTTTCAGGAAAGAGACTTTACATCCGGTTTCCATAATTCATTTTACAAGCAAATTCTAATATACATTATGTACTCTGAACTGGATTGTACAATCAATGGGGGGAGAACACTACAGATACTGTTTCTGGTTTTAGTCGGCCATGACCAGATTCTCAAGGCCAGCCTGGCTCATCGTGGCAATGCTCTACCAGGAAGAAAGGGGCAGCTTTTA	CTGTTAAAATTTAAAAACATCACCAATAATTTATATTAAAAATTTACCAAGAATTAATACAAGTTTAATTATAATTAGGCAAAATTGCCACTTATACTTTAATATGGAAAATATATGATTTTTTAAAGAATGAATTGCAATATCCAAGCAAACTCATAACATATAAAAATGATAATGCAAACAAAAATGATACAAGCAGCAAACACTGAACAAGATCCAAAATTAAATGGGACAGAAGCGGGGAGGGAATCCCCT
ENSMUSG00000022139	Mbnl2	E009	3.77e-05	-0.0553344					TGGGAACAAGGTTGTGTTGGATGAGAACATATCTTTGAGTTAGAAGAACAGTTAAGTCTATCTGATTGATAAACTCTGAGATATTTATAGTTCAGTTCATAAACAACTTTCAAAGGTAAATTCTCTGATTAGACTTCCTAATCAGTAGATCGAAGGCCAGTTTGAAAGTGATATGAGCATAGACCAAAGAAATACGAAGTGAAATCACTTAAAGAGATTGAGGTCGGAACAGACTGCCTGCCCACACACCTGCTG	TAATTCTGAAATAATCAACAGAAATGGAATGGAATGCCAAGAATCTGCATTGAGAATAACTAAACATTGTTACTGTACATATTACCCCGTTTCCTCCTCAATAGAATTGCCACAAACTGCATGCTAAATTTAGTTCTTCTGGACAGACCACAACCCTAAGGCTAGTTCTGCTATGTCATATATGAGTATTAAATATGGTATGCTTAGTATACTCCAGCCTAAGATAGTTAACCACCTGAGACCAGCTGTGATGTT	ATTGTGTTGCGGTCTTCCTTCTTGTTTAGACAGATGATTTATTGGACAGAAATGTTTTTACCTTGGTATAGATACCACTTGGTGACACCAAAGGACAAACTTCAGCCCTCAAGTAGGACAGAGAGAGGCAAAGATAGATAGATAGATGATAGATAGATAGATAGATAGATAGATAGATACAATGATGATGATGATGAAAAAGATAGATAATAGGTTGATAGATAATAGGTAGGTAGGTAGGTAGGTAGGTAGGTA
ENSMUSG00000039568	Ubald1	E007	4.4e-05	0.476776					TGCTGCCTCTACAAAGGAGACGTGCCCAGAAGTTACTGGGAGTCACTTGGGCTGCATCTGGCCCCAGTTGGCCCACCACCCAGGGAAGAGTTCACACGAGAAGACATCTAGACAAAGGGTTAGCCTGGCTTCAGGGAGACCACACCACCTGGCACAGCGCCTGCTGTCCCGGCACTGAGGCTTTTCAGCCAGTGGTCAGGATGGCAGTCCTGGCAGACTGCCTGAGGGGGCGGAGCTCCAAGAGCCAGTGTTCGA	TGCAGAGAGAAAGGCTGTGCTTACCCTCCAAGACCTGTCCAACCATCCCCGAGGGACAGGGTGAACTGAGGTCCAGCAGTGTGTCTGTGACCATCACACAAGGAGGTCTCATGGGACTCCCAGCAGTGAAGACGCTTACAATATCGCTTCCCACCAGTCAGGTAGCTGGGGTCTCATGAACCCTTGCCCCACACCCTAACATTGTCACTGTGGCTTTTCTGGACTCTACTGTGGCCTGGGTCTGTCACCTCAACT	CTCGAACTGCCAGTGGGCCGCTTGTAGCAGTTGCTTCGCCTGATCGGCCGCACAGCCCGCCGTCAGCACGAACTGGTTGATCATGACCTGGTGTTTGAGCTCGTCCATGTTCACGGACATGGCGCCGCCGTGCAGCCCGCTCCGGCCTCCCTGCGCGCTAGCCTCACGCGTCCACCATTAGCGAGCCGGCCCCGGCTAATACAAATATTTACTGTGCGCTCTGACTCACCGCGCCTCGCTGCCCCGCGGCCGGCG
ENSMUSG00000039262	Prrc2b	E053	4.55e-05	-0.0656308					CTCATCAGCCACCTCCCAGATGAAGCGAACCGGAGCAATCAAGCCTCGGGCAGTCAAGGTGGAGGGAAGCAAAGCCTGAAGGTGCCTGGGTCTCTTGCCTCACCTAACAGGGACGGTGCGCCCCACACCCTAACAGGGATGGTGTGCCACACCAGCCTGGACAGCCACCGCCTGGCTTGGACAGAGCTCTCTTCCATTCACGAAAGCTCCTGAGAGTTCCATCGTCAGCCAGCCTGCATCGTGGACATGTGGCTT	TATATGGTCCTCGCTGTCCTCTCTCTGCTCTGCTGTCCCCAGTGGTCACCTTTTATCTCCGTCCTGTTTGACATGTCACAGTGCTACCTTAAGAGGTGATTCTTAAGAGTCACACACACACACACACACACACACACACACACACACACACACCCCGGTTGGCTAACCGTTGGGGTTTGGAGGATGTGATTGGACATTCTGGTTGGTCCCTCACCACCTTGGGCACTGTGAAGTTGGTATCTGAGTTTAGTTCCC	AAAGCCAAACATGCTTTCTCAGGCTGTGTCGGTTTTCTATCATCTGGAAGAGTACGGCTGGCGCACTGCTTCCCGGGAGACTGGGAGTGGCCAGAATACCTTAGGGAGCGCAGCACTGTGCTGTGGTGGTGTTCCCAAGGCTCACCTAGGCAGCCATCCCAAGAACAGCTTTTTCTATGACTTTTGCCTTTGTCTTCCATTAATTGGTTATTTTAAAACCTTAAGACAGGATTCGAAAGATGTCCTCGGTGTGGA
ENSMUSG00000028053	Ash1l	E027	4.8e-05	-0.121007					TTTAACTTTATTATTATATATAAGTAGACTATAGCTGTCTTCAGAGACATCAGAAGAGGGCGTCAGATCTCATTATGGATGGTTGTGAGCCACCATGTGGTTGCTAGGATTTGAACTCTGGACCTTCAGAAGAGCAGTCAGTGCTCTTAACCGCAGAGCCATCTTGCCAGCCCCAAACCACTGAGTTTTGTCCAGATTTAGAACAAAGTCTACTTATTATGCCAGCATGAAACATGTTCTAAGAAAATGGTTTCA	CATTGACGTGACCTACCTGCTGGAGGAAGGGTCCGGCAGGAAACTGCGAAGGCGCACTTTGTTTATACCAGAAAATAGCTTTCGGAAGTGACTCTCAAAAGGATGAGAACCGCGAGCGAGCACCTGGGATCCAACGGCACCATCAAGTCCAGCCTCTTGCTCTCTGGACATGGACTGGGGCAGAAAAGTTCTGTTCAGGCAAGGGGGGTGGGGTCACGTTTCTGACATGGTACTTTCTAAAGCTCGGAGCTAGTG	AACTGTGGAGTCTTTGTGCCTCTTTCCTACCTGCAGTACCTTCCGGCACCATCTTCACCTCATTTCTAAGGACAGCTCTCTGAAACGCTATCGTCACTCTCCTAAGCCTAAGCCCCACATGAGCCGTCTCTTGTATTCTAGAGTCTGTCTAGCTGGATCCAGCCTGTCCAGTAAGCACCGCAGGGAGCACAGGACAGACATTCGACTTTTGTTTGTCAGACATGCTGTGCTTAGAGCCACCTTTTTAATTTGAGG
ENSMUSG00000024576	Csnk1a1	E025	5e-05	0.258104					CAAGAGAATCATTTGATCTTAGGAGTTAATGGCAGTAGACAAGAGTTCCTTCTCAACAGTAGGTGTTTGCAGTGGGTTACCAAGAGAGGGGGTTTTTGCCTTAAGCATAATACTCTTGCGACTAAAATATGTCATTCTTGGAAAGGCGAGCTAAGATGTTAAGTGTCCACCTTGTAAGAAATGGGAACTGAGTTAATCCCTAGAACCAGCATTTTAAAAGCCAGCAAGCTCCAATGGCAAAAGCTACACTTAGAA	AAGGGTAAAGTTAAGAAAATGCTTCTACCCTAAGGGTGGCTTGAAATAAGCATGAGAAATCTAGTCTTAGACCTTCTGCCTCTCACATTATGTAGGTTAATGGTGGCTTGAAACTTTTAGGTAATAGGGTGTACATAGAACTATAGGCTATTTCTGCTACTATAGCTTTTGATGTCGTGGTATCTTCCAATAATGGTAATACCATATTATTTCTCTCTGCTCAAAAATTATGGAAAATGGCGGAGGGTTGTGGTA	GTATTTTAAGCTTAACTACTGTAAAAACCTGTTAGAAAATGAAATCTGGGGAGACAAGACAGTAATTGAGACTACTAAACTGTTGGTACAATTCAAGAATGATTTGAACCTCTTACACATAAATTACCAGTTTGTGATTAAGAAAATACTTTAATCTTTCATGGTTTTAGTTGTTTGTAGATGAGTTGCTAGGACTGTTGTTTGATGGTTTGGTAGGATATATGGGTTTATACATACTGGCAGCTTAATTCAAAA
ENSMUSG00000066392	Nrxn3	E045	5.75e-05	-0.190614					ACATACGATGGTGTATCTCTCTGTGTAATGGTGAGCCATGCTGCAAGGTTGTAGCCTTGGCCCGAAGACAGAAAATTCTCTCTGCCCTGCTGTATCATAAAGCACACACTTAGTGCCCTGGAGCAAGTCCATGACTCCACATGACCTTGGAAGCTTTCTTCTCTCCAGAACATTTGGAAAGGGGTAGAAGACCATATGGCTTACTTGTTCCATAGCTCCAAGTGAGTCTGTAATAATGTTTGTGAATCTTGACTG	AAAAAATATACTCAGAAAAAAAGTATGAGACTCTTGCCATATGAACTCAAAATCTACCATGGCATTCACTCCATGTAGCAGGTTGTGGTGTCTCTAGAACCAATTGTTAGTTTCCTAATGCTTTGGTGAACCCATGTGGGATGACAAGCCGTTTGAAAAGCAGGTCCCCAGATCTAATTCCAATATTTGCCATTCAAACCTGTAACAGATGGGTTTGGGGCTGGTGTTATCGGAGCTATTGGTTTCACTTAACAA	AAACAAAGAAAAAAAAAAACCCACAAAAAAGAAAAGACAATGTTAGCATCTGTTTCAACAGACTGCAAGGGAGTTCCTAACTTGTAACACAACCACAAGTGGTCACACAAGCCTAGTCATGGCCAAGTGTGAAAAATCATAGTTACTTCCCCACCCCCAACATAATAACGGTTTCCATATGGTTTAACTTTGTAGCCTGATGTGAGTAAATCCTTCCCATCTCCTCATGTCTCCTTCCGCCCATCTTTTTTTTTT
ENSMUSG00000025964	Adam23	E038	6.76e-05	-0.0567945					TTTCCACCATGAGAAGTGCCTGTTCCTTAGTGGAGTAAGACCTCACACACCCAAGGCAGAAATAGCCAGGCAGAGCAAGGATTTGGTGAGCTCTGTTGCTACAGAGCTCTGGGGGTTTGGAGGGAACAGCTACAAGACCTTCCAAGTTCTTCCTAGTTCTCATAGGTGAAAACTACTATGCTGTAGTACTTTTCATCTGGTGAATTAGCAATGGTTTTTGCTTCTGAAATTAGACCAATTTGTGGTTGAAAATGA	AACGTCAAGAAGAGGAGATTCGATCCCACTCAGCAAGGCCCCATCTGAATCGTCTGCACTGGAGGAATGCCACCTTGCACTGTTGGGTTCTGGGAATGACATGTTTTCAGCCATGCTGCCGGAACTCTTAAGTCTGTAAAGAAGACCCTTGGGTGGTAATGACTACAGAGCCTCAGATCTGAGAATTGGGATGGGGTACAAGACAAAGGTCCCTTTTGGAAATAACTTCAAGTAACCCCCCCCCCATCACCTGTC	TAAACATGTTCTGGATTAGGGCTCAGTTTTATTAGAGTCATTGGGAGTTCTTTGCCCCATATGAAACAGAAAGCCAAACACAAAACAAACAGGACAAGCATCATACCACTGTTGATTTTATTTTGAGTTTTTAGTGTTTGTCCCTGAGTTTAAAGAGTGGCTGGTTAGCAGTAACATCCATACTTTGACTTGGTACCAAATTAACAATGAAAGTGTGTGCTTGCACACATGAGGAAGGAGAAGGAGAGAGGAGAT
ENSMUSG00000077254+ENSMUSG00000029505	Gm26079,Ep400	E002	7.13e-05	-0.21267	recognized	339			TCTGCTTCATTTGTGCCCCAGCAAAATACCATCTGACACAACTGACTTGGTTTGTCTGGGTCTGTATAGGATGGCATCTGGTGATGGTAGTGGACATACCAGAAGAGGTGGTGACCATGGGGCCAGCTAGGTTGAGGGCCACCTGGGGATCTGCCTGCATGAGGCTGGGCATGAGCAGAACCCGAAGGAAGAGCAGAACCCGAAGGAAGAGGTGTGAGAGCTGATTTTGCTTGATAGGTCTAAGCAGAAATGAAG	GTAGAAAGGTTATTTATTAGCCTTTGCTTAGTAGGACATCTTGTCCTTTTAAAATCCTATTCAAGTACAAATGCTTGTGTTTACAAAGTATTTACAATTTCAGTCCTGTTTCTTACATTTTTAAAAAAACACAACAGCTATCTGGTTGAAAAATAAACAAAAGCAACTGCCAAAAATGAAGACTCTGCTTCTCACATTGCCTTTTGGGTCCCACCAAACATGGCTTGGGCACACTGAAGAAGGCTGCCACCACAG	CTAAGCCAAGACCAGAAAGCACATGTTACCAGAACCACTGCATATACCCCATGGTCTCAGAAACGCAGCGAAGGATTTGGGCCAGTGTAACTTCATTTGGTTTCTTCAAATCAACAGGCAACTTAAAGTGAAAATGTTTCAGTATTTAAAACAAAAGCTATGTCAACTTGCCACCTTACCTCCACCTGGATCCCATGCTGCTGACACTCCCCAGAAGCTGTAATCCTACCTTGTGGAAAATGCCAAAGGTGCCTG
ENSMUSG00000025422	Agap2	E019	7.14e-05	-0.0889065					TGCCAAGCCTACACGGGACTCTTCGCGGTAAGGATCGAGGATCAGCGTGAGGGTGTACGATTCCTGGGAGGTCCGGATAAGAGGTCCCTTATAACTCTTTTCCTTGGTCCCTGGTGCTGCAGGGAGGAGCGTGAGTCGTGGATTCGCGCCAAGTATGAGCAGCTGCTGTTCCTGGCGCCTCTGGGCACCACGGAGGAGCCGCTGGGCCGCCAACTGTGGGCCGCTGTGGAGGCCCAGGACGTGGCCGCCGTTCTG	ATGGCGCAGACGTGGCGGCCCGCGATGCGCAAGGCCGCACGGCACTGTTCTATGCCCGCCAGGCTGGCAGCCAGCTGTGTGCAGACATCCTTCTCCAGCACGGCTGCCCGGGAGAGGGCGGCAGCACGGCCACCACGCCCAGCGCGGCCACCACCCCCAGCATTACCGCCACGCCCAGCCCGAGGCGCCGGAGCAGTGCTGCCAGCTTGGGCCGCGTGGACACCACGATCGCGCTGGTATAGTTGCCCAGCAGCG	AGGGGGTGAGATGCTGGTCTGTTATTCGACAGGCAGGTGAGGGTGTGGTCTCCATGTTGGGGATGGGAAAGGATTAAGCAGAAGTTCTGGTTTCTGGGCTGGGGCTAAGACAGCACCCATGGGCACAGAGGTAGTTCCAGCTTTGTACAACAACCCTGGGTTTATGAGGTAGGAGCAACAGTGGGAACCCAAGAGCAGATGTTAGATGCACAATTGATGCTGAGCCTGGGAAGGAGTTGGAGCCTGGTGTTTGGA
ENSMUSG00000022054	Nefm	E001	7.19e-05	0.162319					AAAGCCATGGCTTATTCAAGACTTTTTTTCTCTGTCCCACCTCCCAACCTCTTCAGTCCTCTTGTTCAGCGATGAATGAGAAAAAGAAGATACAGGCTACAGAGAACCATCTGAAGAAACGCTTGGCTCTGTATGCCAGCCACACTCAGGCAGCCTGGTGATTAGGTTTGAAAGCTTAGATTGTGTAAACACGGGTGGGCTTCTAATATGGCTTAGACTTAACAGCTTTAAGCCACCAGCAACCTTACAGAAGTC	TGCTTAAAGGTTTTAGTTATTTCTTACAAATCTGCAGTATCTCTTCGGAACTGCAGGCGCTCACAACGCGAGTATGAAAATGTTGCACCCACGTGCGTTTGGCGTGCCCACTCTGGTATCTGGGTGCTCCCTGAAGGAAGCCCATAGGTTCCTAAGTGTATCTATTATCTGTGAATTTCAGCAGGCTCCATGCAGCGTTCTCTTCCTGAAGACCACACCCAGAGCGGGTAGCCCTTTGCAGCAGTCTCTCTCTCT	CTAGAGGACAAGCAGAATGCAGACATTAGCGCCATGCAGGTATAGTACGGTTTAAGCTCAGTGGGGGTGGGGAGGTCCACGGTAGGGGCGGCGGCGGGGGGGGGGGGAGTCAGGGTGTACCCAGAGAGTGAACGCTAGGGGGTTCTAGAGCACAGAGCAGCTATCAGAGGGCTTGGCTTCCGAGAGGTTGTGGAAAGGATGGGGCATTTGGAGGGGGCGGGGCGCGACTGCTGCCTGGGGATTGCTTGTTCTGGT
ENSMUSG00000040565	Btaf1	E005	7.19e-05	1.07779					AGTCTAGGTCGGCCTGCTCACATGGATCCATCCACCTGCCTCTGTTCTCGGGGCGGAGATTACACCACCATTGCTGGCTTTAAGTTTGTTACTTTGAGACAATGCTACTGTTAATCCAGCATGGCCTTGAATTTAAACTATGTAACCCTGGTTGGCCTCAACTGTGTAGCCTAGACTGGCCCTGTATTGCTATTTTAGCTTTCTGAGTACTGGAATTACAGGCATGTGGTATAACTTAAAATTAACCAAGCAAAT	TGAAGTGGATCCTAAAGAGAGGATAGCACGCCAACGGAAATTATTACAGAAGAAACTTGGACTTAATATGGGAGAAGCAATTGGAATGAGTACTGAAGAACTCTTCAACGATGAAGATTTGGATTATACCCCAACTTCAGCAGCCCTTGTAAACAAACAATCT	GTAGGTAAAACATTGGGTTGCTTGATTGCAAGTAACAACACAGTTTGCTTCATCTTGCTATGCAATTGCACAAGAAAAATGCTGTGCTTACATCTACTCGTTGCTGTTAGTGCCACTTTGACTCAGTCAGTGTCTTAAGCTGAGAATCTGCCCAGTTTCCTTTACATCAGACTGCTAGACTGTTCCGTGCCACTAGTACTAAAAGATCCTACTTGCTTAAATGGATACAAGTAATCTTTTGAGAGTGGGAAAAGG
ENSMUSG00000030257	Srgap3	E002	7.99e-05	-0.0506273			recognized	372	TGGCAAACAGGTGGTTCAAATCCTCAATCCTCCACTTCTGCGGCTAACCTTTGTTGTGCAAACCACTGCTCCTTTGACTGGTGCCTGTTTCCTCACTTCTCCTGAGAGTTGGGCATATACAAAGGTGTCAAAACTTTCTCTAAGTCATCACTTCGTCACTCAATTAGACATCACTTTCAAACAAGTGCCTCCTCCTACAAACTTTCATTGTTTGGGATTAAAGGTGTGTACTAAGGTCCTGTCTGTGTGTCTGTA	AGAAAAAGTTAAGCTGTTTTATTTCACAGGATAGCTCCACATCAAACCAGCAGGCACCATCAGAATACGCAACAGAGGATCCAATCAGACACTCTATAGGACGGGCATTTTGGTCATAAGGTAGAGAAATGATACCCAGAAGAGGGCAACAGTTAGCATCACATGGGGACAGGCAACCAGCAATTTCCTAGGGTGGTTTCAGTTTGTTTTTCCTGTCATAATTTGGGGGAAGAAAGAAAGCAAAGCAAACAAAAC	CTAGAGGGCAGAGAGGGCTCTGGTCAACACAGTGTCTTCAGAACTGCTAGCCAGTTCAAGACTTTCCAGAGGATGTTTTCTGGAAGCCCTATGGCCCAGAGGGAGATCAGACCCCAAGGGCGTCTTGCAACCAACTCAGGGAACCAGCGCGAGCATTCATTCCCTGTGCCTGCCCTGAATAGGAAGTCACCTTCATAAAGGCAGATCAAGTTATGGCAGGCAGACAACATTCAGTCAAAAAACGGACTCTACTAC
ENSMUSG00000044308	Ubr3	E053	8.24e-05	-0.513054					CGTGTGGTGAGCTCTGAATCCCAAGTGCTGCTGAGCTTAGCGGCTGTTTATCATCTGTTGCTTTAATGAAGCCTTCACAGAACAGAAATTCTTATTTTTCTTTGAATTTCCCAATTCCTAGAAAGTGTTTTACAGAAATTCGTTGGCTAATGAATATATGGAATTATAATGTGAATGGAGTAATATCTAGAAAAAAAATCACCAGTACTGTTTTATTCCTACAAGTAGTAAATACAGCGTGCTCTGCAGGAATTA	TAGTTAATATCTTTCCATGTTTAGAGATATATTTTCATGCATGTTCAGAGGTACTATTTTTTTCCTCTCTTAAAATAATAAACATATTTTAGGATGCTTATTCTAAAGTTTTACATCTGCTATAATTGAAATCTGTATGGAAATAAAGAATAATTACTAAAGGGCTGTTTGGTTTTTTGTAAAATGGAAAAAATATTTAAATAAATAAGTCACATTCTTGAAAGTAGATTTTTCATCCTAAAATAAAATCATTTT	GCCTTGCTTATCCAAGAATCAAGATGGAAGTTACCACACCTGTTACAGTTGCCTGAGAATTACAACACTATTTTTCAGTACTATCATAGAAAAACCTGCAGTGTCTGCACCAAGGTTCCTAAAGACCCAGCTGTTTGCCTCGTCTGCGGCACTTTCGTATGCCTGAAAGGCCTGTGCTGCAAGCAGCAAAGTTACTGTGAATGTGTGCTGGTAAGCAGATGGACCAGAGCCATCCAGCCCGGCTCTGGGGAGTGT
ENSMUSG00000026463	Atp2b4	E028	8.38e-05	0.191605					GTGAGGACATTGACTATACTGATAAGTGCATCTACATAATAAATAAGGACCCTCCATACGATGGACCGACACAGAAGTAGGAGGAGAGAATGACTCAGAGATCACAGTTCCTAAACGTGGTAGAGGAGGAAAGCTCTTCATGCCCTCCCTCAGTGGCCACCTCGGCTTTAGAGGTCTGTGCTCTCCCCACCAGACCAGACACAACTTATTGGATCTCCAGAACCGGACTTTCCCTAGAAGCTAGACAAAAATATT	TTGCCTTCTTCAGTTACCAGACTCTCAACCAGAGAAGATGTAGAGTTTCCCCTCTAACTGATCAGTGTCTCTTGCCTTCTATTCGCCGTTTCTTCCCACTTCTTTCTTCTCTGGGAGGTCAGTTAGGGGATAAATTGACAATATCTCGTGCAATAAGTTTCAGAGTAGCAACACCCGGCCTAGATCCTTGCTTCTGTATTAAGTCTACTAGTGAGAAGAGGAAGAGGTTGGGGGAACTTAGTAAAAGATGGACGT	AATTACGATGGTAGGCTGGCGTCAGGAAAAAGAGGAGGGCTCCCTGGATAACGATGAGGGCTAGGCCTCTGGAATAGAGATGCAAAAAAAAGACAAAAAGGAACAATTAGAACAGCCATGAGGATCCAGGATCTGCAAGGTACTCTCGAGAAGAAGGGTTTAAATGACAGTTGGTGGCTGAACGGAACTGAGAACTGAGGCCTGAGCTCAGTATCCAGGCTCATGGGAAGCCCTGGGTAGGCCTGCTGGCTGGGA
ENSMUSG00000040785	Ttc3	E100	8.71e-05	-0.0874692					GGTGTAAGGAGGACAAGGCCCTTCATGAGGTCATGAATCTAGTTCTGGGGCACTGCCCTGAGCAGACATTGATGGCTTAAGTATGGGCAGCACCAGACTTGGAGGTAACATGAGCCATATGTATCCCTGCCAGAGTCCAGTGATCTGAGAGAGCCGAGGCCCACGTGGTCCTGAGGGCACCAGCTGACTTTGCTTTCTCACTTGCAGTGCTTTAAGCAGTGGCTGAAAGGGCAGAGCACGTGCCCCACCTGTGGC	GGCAGGTGACAGCCATGTGTGTCTGCAATGCTGTCACCATGGTCCTGCACTGTCGTGGCTGCTGCAGGATACTCTGAGATGAGCAGGTTCTTTGGAAAGAACTGCTGAGCTCCTCAAAGCAGTGCTGAGATTGTAAAGGCTCTCAGCCTCCTCAGTTCCTCATGTGGCACTGTAGCATCCCCGTCATAAATTTTTAAAGTGCTTATGATTCAATTAATCTACATTTTGGTAATCAATTATAAAATACTTTTTAAA	ACAAAGAAACAAACAAAAAACTTTTCCAGCGTGTTCTCTGCTGCCCTGGAGATGCCGTCACCTTCCACCCGTGTCTGTGTGAGTTGTGGTGTCTTAGTGACTTAGTATGTAGCTCACTCCTTATTCTGAGACATTGTCTGTGGTGTCCCTGAAACATGGTGTCCATGCTGTAACAGTGGAGTGCAGTACATGCCTGAGTACACACAGCAGCTTATAGTATCTGTCGGGTACAAAGAAGAGTAGCTGTTGAGACAG
ENSMUSG00000004207	Psap	E020	8.88e-05	-0.0688622					GGTTCAAGGGTGCTCCACAGGGTGTTTGTGAGCAGCCCTGGGGGCCAGACTTGCTTTCCTGATGGGGTATTGGTCTTGGCCTCTAGCGCATAAAGCTTTGTCGTTCCTTCTCAGGGACGTGAGTCAGCCGGGCCCCTCCTGTCCTTGTCTGCACTGTCACACCCCATGGATAGCATGTGGGCCTGAGGCTGCCCCTCTTGAGCTCTTGTTCATTGCTGTAGGATTTTTCAGTCAAGCAGCAGGGACTGGGGGCTG	CTGTCGATCATTGCAAACGCCATGTGTGGAACTAGTTTCCCAGCTGCAGAAGTCACCTACTTGTGGGTCTAGGGTAATGAACACATAGATCTATTTGACTTAATAAGTAGGAACCCCCTTTGCCCTTCCCCCATCTCCTCTCCCTTACTGTAGCATTTCTGTCATGTAAGAGGTGCTGACAGCCACTTCCGTGTCCCCTTTCTGCTCGAAGGATGAGGATACCTTGGGCATCAGCTCCCCGGCTGCCCTTTTCAC	AACAGATCTGGCCTTGTGTCTCTTTGATACCTCAGCCAGAAGAGAGTGGGTTCTGGGTCCCCTTCCCCTTCCCCTTCAGCTCCTAGCAGCCGCTCTGGCCAAGGGGCTCCCTCCCATCCCCCCAGGACCTTCATACGGCACCAAGTCAGGGTATTGCTGGTTCCATGTGAGTTGCTTTTCTTTTTAAACAGAGCATTCCAGAGACTTTCACTGAGCATCAGTTAAACAAAACCTGGAGGAAATCCTGAGGGAGTA
ENSMUSG00000037852	Cpe	E001	8.88e-05	-0.060287					CATTTTTTGATTGGGTTGTTTGGTTTTTTAGTGGTTAGCTTCTTGAGTTCTTTATATATTTTGGATATTAGCCCTCTACTGAATGTGAGGTTAGTGAGGATTTTTTCCCAATCTGTAGGTTGCCAATTTGTCTTATTGGCTATGTCCTTTGCCTTACAGAAGCTTTCCAGTTTCATGAGGTCCCATTTATCAATTCTTGATCTTAAAGTGTGCATCACTGGAGTTCTGTTTAGAAAATTTCCCCCTGTGCCAATG	CCTTTATTCATCAGAATGCAATTCTGGGCCAATCTACAATCAAGACAAAACCCCAAACTCTGAAGTGGCATTAACAGGCTGACTAATACAATTCCATTCTTCAAAGTACACGCAAGAACTAGGTTTTCATTCTGTTCAGAGCCCCTCTGAAAAGCACGTACATTTTCTTCCCATCCAAAGTGCATTACCAGGATCATGCTTATACAGTGAATCAGCACAAGAGACTAAGGACAACTTATATGGAACTATGTGATT	CTGAGGAGGAAAACCAGAACAGATTGCTGTCAGGTCGCTTATATAGTTAGAAAGGGGGTTTGTAGCTTGTACAGTAGAATAGACTCAATCTAGCCACCTGAATTAAAGGAGTATTTTTAAAATCGGTGATAAATGCAATATAGTTTTGTAGGTACAACATTCAGAAGAGAGTTCACCTTAAACTGAATAGCTTCAAAACAGCTCCTGTTTTATAAAAGCCATGACTGTCTCCCCCCACACCCCCTCATGGACAGT
ENSMUSG00000029104	Htt	E080	0.000103771	-0.101518	recognized	232	recognized	364	TAACAGTGATGCCAGGAGTTCCTCTTGGCAGCCTCCTTCTCAGTAGACCACAAGAGTTACTAGCAGCAAAGCTGTCTTGGTGGTGACAGTACAGCCTCACCCTAAGTACTGGGAAAGCCTTGCAGGCAGGGTGCTAGCTAGCTCTGCCCTCCCTGCACTGGAGCAGTTTGAGCAGGAACACCAGCCACTAGCACTGTGTGGGGAGCACAGCCCAGGTAAGTGCTGTTGTGCAGAGCACTGGGAACCAGCATCCTG	CTTCCACATGTCATCAGCAGGATGGGCAAACTGGAACAGGTGGATGTGAACCTTTTCTGCCTGGTTGCCACAGACTTCTACAGACACCAGATAGAGGAGGAATTCGACCGCAGGGCTTTCCAGTCTGTGTTTGAGGTGGTGGCTGCACCAGGAAGTCCATACCACAGGCTGCTTGCTTGTTTGCAAAATGTTCACAAGGTCACCACCTGCTGAGTAGTGCCTGTGGGACAAAAGGCTGAAAGAAGGCAGCTGCTG	TGAGGCTTGCTTTACTTATAAAACCTCCTTTCTAGCATTTGAGGAGAGCATCCTGCTTATCTCCAGTGGGGCAAGGATACTACCAGCAGCCATCTTGACACTGTAAAGATCAGGCAATACTAGGTATAGAATGAGACTGTGTGCCTGGAATTGGGACCAGGCCTAGGAGTATTCGCAGACCCTATTGAAGTGGTCTCCCTGTCTGGGAGATATGGTGTGCCAAGTTCTCATAGTTATTGGCATTTTAAGCCTGTC
ENSMUSG00000026490	Cdc42bpa	E069	0.000106491	-0.0971356					AGAGATCAGAAGTCAGGTCCCCATGGTGTCTCTTCTCAAGCCTAGGCAGGCTGAGGTCACAGGGAAATCTAAGGAATGTTTGGAGATTAGTGCCATTGGTGGGATGTGACCTGAACACCACCGGGGGTGGTGAAGCCACTCCAGAGGCTCACTTGCTCTGAGGCATCTTGCCTCTGGTTCTCAGACCATGTCCCCCACTTACAATATTTTGGTATCTCGCACAGATGAATGTGAAACAATTCTGCCACCTTCCAG	GTGAGGGGACGGTGGGGCTTGTGGTGTGCTGGCCACCGTGGACTGTGAGCCAGCTTCCCCTCTGGATATCTACTGCTGCACTTGTCCCAGGAAGCATGAGGAGACCACAGAGTCCTCTACTCAGACGTCCTCCAGCTACGCACACAGGAGGGGACAGGTGGAAACTAGTGCTCATGACGTAAAGAGGCCCTGCCTCTCTTAATCCTCTCCTCTTCCGGGATGGAAAAGCCACCATTTCTCCCCACTTTAAGCCAC	AGCATTGAGTATTCTATTTCTTCCCGTGTGGAGAGTGTGAGGCATTCTTGGCTCGCTGATCTCCCTCTGGACCTCTTCTCTATCCCAGAGGACACAGGTCGGTTTGATCGGGTCCTGGAGCTCAGGTAAGAATAACATTCAAATCCATGGAAGTGCTCAACTCCCTTTCTCTGATAAGAACTCCCCGGGCACTGCTTTAGGCCCCCAGGGCACACTCCACTGGCGCTTGAGACTCGGGGTTGTCTGTCTGCAGCA
ENSMUSG00000095118+ENSMUSG00000064791+ENSMUSG00000096263+ENSMUSG00000015656	Snord14d,Snord14e,Snord14c,Hspa8	E036	0.000110596	1.3223					GTAGCTTGTATAGAAAGCCCAGGGAAGTTCCTCGCTGTGATGATGGATTCCAAAACCATTCGTAGTTTCCACCAGAAATGCTGTGTTGGCTAGTTCCTTCCTTGGATGTCTGAGCGAACTTATCTTCCCCAAATTTGAGCTTAAGCCACACGAGCAGTAGTTTCTAAAATTGGATGTCTTAATTTTTATTGTCTCTTCTAGGTGTATGAAGGTGAAAGGGCCATGACCAAGGACAACAACCTGCTTGGAAAGTTC	CCGCTTGAGTAAGGAAGATATTGAGCGCATGGTCCAAGAAGCTGAGAAGTACAAGGCTGAGGATGAGAAGCAGAGAGATAAGGTTTCCTCCAAGAACTCACTGGAGTCCTATGCCTTCAACATGAAAGCAACTGTGGAAGATGAGAAACTTCAAGGCAAGATCAATGATGAGGACAAACAGAAGATTCTTGACAAGTGCAATGAAATCATCAGCTGGCTGGATAAGAACCAG	GTATGTGTTTTGCCAATAAGTAGATGTTCATTCAGAAAAGGGCTGAGAGGGGTCACAATGATGATGAATGGTCCAAACATTCGCGGTTTCCACCAGAACGCAAGGCAGTGTTGGCAGTTACCTTCCTTGGATGTCTGAGTGACTCAATAGCTAAGGGTTCTTTAGGCTTAGTTGTCAGTCTCCTCCCCCCAAAGTAATTGGAGATCTTTTAATAAATTTGATTTCTTTTTTCTCAGACTGCAGAGAAGGAAGAAT
ENSMUSG00000095118+ENSMUSG00000064791+ENSMUSG00000096263+ENSMUSG00000015656	Snord14d,Snord14e,Snord14c,Hspa8	E037	0.000117599	1.3585					CAACAACCTGCTTGGAAAGTTCGAGCTCACAGGCATCCCTCCAGCACCCCGTGGGGTCCCTCAGATTGAGGTTACTTTTGACATCGATGCCAATGGCATCCTCAATGTTTCTGCTGTAGATAAGAGCACAGGAAAGGAGAACAAGATCACCATCACCAATGACAAGGGTAAGTATGGACCTGCTGCTTTCTTTCTGAATAGAAAGAACAAGGTTTGCTCTTACCATTAAAGAGACATGCTCATGATTTTGTAACT	TATGTGTTTTGCCAATAAGTAGATGTTCATTCAGAAAAGGGCTGAGAGGGG	TCACAATGATGATGAATGGTCCAAACATTCGCGGTTTCCACCAGAACGCAAGGCAGTGTTGGCAGTTACCTTCCTTGGATGTCTGAGTGACTCAATAGCTAAGGGTTCTTTAGGCTTAGTTGTCAGTCTCCTCCCCCCAAAGTAATTGGAGATCTTTTAATAAATTTGATTTCTTTTTTCTCAGACTGCAGAGAAGGAAGAATTTGAGCATCAGCAGAAAGAACTGGAGAAAGTCTGCAACCCTATCATTACCAA
ENSMUSG00000061603	Akap6	E014	0.000119005	-0.0890836					CTAGGTAAGGACCGAAAGCTTTAGGGGTCATCATAATGTTGTGAGTGTTCCACCGCTCTATAATAGAACGTCCCACGCAGACCAGTGGAGGAAGTGTCAGCCTGGGAGCCAGGTATCTCCTGGCTTGTGTTCGTACATCGTTGCATTCTTTGGTACTGACTACCTGATATTTTCTTATGGGTTTTTTTAAAAGAACTTGATAAAATTGAGACCATCCCCAGAAGAATAGATGAATTGACGACCCAGAGAAAAGAT	TAGCCTGGCTGAAGCTCGGGGCTGGCCTGACCCACCCTGGGCTGGTCTTGGGTTCCATCCTGTTATCATCACTGCCTCCTGCCACGTTGACTTCCTGAAGACGAACCTTCCTTCTGAATGCGGTCTGTCCACGTGGGCCTCCCGATATGGATGTGTGCATTGCTCCTCTTAGGTGATCGTCTTAGTTCCTCAAAGCTGCTTGTTCTCCCGTGGATTCCTGTCCCAAGCTACCTCTGGCAACCCTCTCTCCAGCAA	TCCATGACTTCCTTCTGTGGTCCAGGCTAGTGCTGGAGTCATCTTGAATCTTTTCCTTATGTTGGATTCAAACCCAACATTTCCATGGAAAACAGATCTGCCTTTCCTATCATTCACCCACTAATTTATTCAATCATTCAAACATTCATAGAGTAGCCACTAGTGTGTGGCATAGCATTGTCTCACCTACACAAAGACAACTGAAGCATATGTGCTTAGAAGTTTCTCTCTGATCATACCCTTGAAGATAATAAT
ENSMUSG00000032503	Arpp21	E035	0.000119979	-0.0752824			recognized	315	ATACAAGATATGCAAATCAGACTGTAATTCTACTGTAGTCATTCTTCAAGTGATTAGGGACAGAGAACTGTTGCAGTCAGTGAGGGTTCAAGGAGGAGCTAGAGGCTGGAGTTTGCTTTTACTTTCTCAGGACATCCCTAGGACATTTCCAGCTGAGGTGGTATCTGAGGAACAGCCAGGCCATCAGTAGACTCATAGAGAAATTGTGGGCACGTGGGTCATGAGAGAATGGTTCCATTTCTTCTTCAAAACTGT	AATATTTTTATTGATACGCTCAATATTAAAATACAAGTGTTAATAAATACATTGGTACAGGATAAGTTTATACCCAACAACAGTAAAAGAATGATTCAAGTTGCAGTAACACACTGGTCAGTAAATATTATAACATTAGAAAAAAAAACACGCTTCCTTTACTCGAAGACAGACTGAACCATCAGGTGTGGGTCTGAGATCAAGTAACATGGGGGACAAGAAAGCTTTTCCCACACAGGAAAATGAAGGCAGTTT	AAGACAGGATGCTTGGGTTCTATTTGGTTCAGCCTTATCAAGAGAGAGCCTTGGTGGATATCCAGCACTACCGTGCTTACTGGATTTTTATTTTATTTTATTTTATTTTAAGTTAAGTTTTAATCTAAATTCTTTTGAGTTCCTTTCCATTTGCAGTTCTCAGAGAGTCTGGAAAAAAACAAATGCAATATCCTGTGATATACATTGAAACTAGTTGTGCAAGATATGGGGAGTGTGGGGGTGTGGGGGTGTATG
ENSMUSG00000084516+ENSMUSG00000027177	Mir1902,Hipk3	E001	0.000123502	-0.117244					CAGATCTGTGTCTGAAGTTAAGGACCGGAGAATAAGATGCCATTTGAGAAGTTAACTGGAACTGACTTGGGGCAACCACGTTCTTTCAAAGTCCCATGTTGTACTTTTCAAAAACCATGACTTCCCTTGTCCTCCACCCATGGATAGCAAACAGAATGCTTCCCTCAGAAATATTTGAGAAAAATCAAATTTTCAAGAAAAATGGCCCACGGTTATGCTGTGGTTTCAGGTGTTTCTGGCACACTGTGCCAGATG	TTGCCGCAATATATATATTTTAATTCAAAGTGAATCAACAGTAATACACCATAAATTCTTATTTTGACACTCACCAAAATAGTCACCTGGAAAACCCGCTTTTTGTGACAAAGTACAGAAGGCTTGGTCACATTTAAATCACTGAGAACTAGAGAGAAATACTATCGCAAACTGTAATAGACATTACATCCATAAAAGTTTCCCCAGTCCTTATTGTAATATTGCACAGTGCAATTGCTACATGGCAAACTAGTG	TTATCTACTCAAGTCATGCCTACTGCACCTCTAAACATTTTATCAAGTCCAATTATACAGCAAACACTCCCAAAATAAACTTAGGTTGTATTGCAGTTTCACTTAATAGTATATAAAATGCTGTGCTGTGACAGATATCAACTATCCATTAGTTACTGAATCAAATTTTCTTAAGCACTACTAACTGCTTGCTTTTCTTGAAGCTAGATCATTCTGGAAAAAAAAAAAATCAGACAGCAGAATTCAGCTATAGCA
ENSMUSG00000055204	Ankrd17	E001	0.000132074	-0.177689			recognized	405	AATTTCTAAACTTCTTTAGGAAAATTTAAGAAAATACATATGAGGCAAATTCTTATGAGAAATTATAAAAAATAACCCCTTCAAGTCAGACTCAGGTATATTTTTGCTTTGGGGGGGAAGTTGAGACAGGGTCTCACTATGTAGCCCTGTTGGGCCTGGAACTTTATAGACCTGGCTGGTCTTGAATTGAAGAGACCCTTCTGCCAGGCTCCACATCTGCCACACTTTCCCCGCTTTTCTTCTTTTTTGAGGCAG	AATAAATAAAATGTTCTATATTACATCTGAAGTATAAAAATGTATTTGAAAAATGTTCCTGGTACAAACTTCTAGAACCATGGCGCCATCCTGCTCTCTCAGTGTAGAGAGACAGGGCTCAAATCTATTTCCATGCTCCACATTTTAAAACCAAGAAAATACTCGCTTTCCCACCCTTCTTCCTTTTTCAGTAAGACACTCGCTAGGAGGTTATGTGTGGTGAACACCACTACTCACACGTGGCAGCACACCCTG	CTACAAACAGAGCATTCGTGTCACCAAATACAAGTCAGGCAGATACTTAGAATACTAGGACAAACAATGAAACATTTATGGACTAAGACAACATAATCTCATTCAATCGTCAACATATAGCTGGATTTGGCAACACATTTAGTCCTAATAAAGAAAAGGAAATACTCTGGAGTTCAAGGTCATCCTTATCTGTACAGTAGGGACAGCTTGGGTTACTTGAGACCTCTTGTCAAAGAACTCAAACAGAAGAATAAA
ENSMUSG00000035152	Ap2b1	E036	0.000139808	-0.0806196			recognized	231	TGCCTTTGGAGCCAATGCTGTCTCCATGCTAATTTCTTGTCTCCTCCTCTTCACAGCTGTCGCTGAAGTGTAGAGCCCCTGAAGTCTCTCAGTACATCTATCAGGTCTACGACAGCATTTTGAAAAACTAATAAATGGGTCCAGTCAGCCTGTAATCGGTGCAAGCCAAGAACTCTTAACTGGAAGACGTTGTACTGTTGTGTAGAGCCTGAACCCAAACCCTGCGGTACCCACCCCGGTAGTGGCCAGTCATCT	AACATAAACTGCACCTTATTGTTTTATATTTTTGTACAGATGAGAAGTTGAGGTAGAACACTGAGTAGAAAGGGCGACTGACCCTCATCAAACACAGTCTTAGCGGAGATCCACTGATGGCCCTGGCCCCTGCTGGGGCGGGGCAGGAGGCAGCCCTGCTCCTTGCCTTTTGCATTGTCATTCCTCCCCTCTGTCCAGGTCATTCCTTGGCTAAGCCTTCGAGCTCCCTTATACCCATGCTATCTGGTTTGACAA	TAAAGTTTGTGGTATGGACTTTGTTCCCAGGACAATACATAGCTGGCTAGAGAAAGGACCTTAGTAACCATTCTTATTCTTATTCTTTTTTTTTTTTTTTTTTTTTTTTTGTAAATGGCCCTAGCCCTCCCAAGGGGTTCAGCCAGTTGAAATTAGAATTCAGAAAAAAAGTATTTATATCAGGAAGCCACCTGTTGTTCAGGTCTCAAGTCCCATAACTTCAGGAAGGTGTGCATGGGGAGAGTCACTCTGGGC
ENSMUSG00000037416	Dmxl1	E043	0.000155311	-0.165237					CACCAGGGTTTCAATTCTCATCACTCTCAGAGAAATAAACAAGAGAAAGCAAAGAACTGAGAAGAAATTTTATAACAAAGTAGAATTACACACTCAAGCATCATGTGGCTAGAACTTTGGATAATTCATTTTATAAGCAAATCTAAATAGAGGGCAGGATTGGTCAGAAGATGAAGTCCGACAGGGTAATCTAGGAATAGGTTTGGGATTTTTTCCTGAATAGAGTTTTCTCCCCCTTTCCTGTATTTGCATCTT	TTTGGAGTCTTTCGTCCTTTAGTCTTCTCCATACTTTTATCAATGAACACGCTCGGCAGTCTATTTTTAGAAATATTGGAACTGGAGTCATGCAAATTGAGACAGGACCAGCAAATCACATTTTCTCTTGTGGAGCTGATGGAACAATGAAAATGAGGATCCTGCCGGATCAGTTTAGCCCTTTAAACGAGGTGTTGAAAAATGATGTGAAATTTATGCTATAACATTTTCACAAGAGGGTATATGATTTATTAC	TACAGTGGCTCTTAAGTGTTAAAGTGAAAGAGTCTTTTGGCTTTAAATTTTAAAAAAAGTGTGTGAAAAGAAGTAAATACCCGGATGGACCATCAAGAGACTGCCATATCCAGGGATCCATCCCATAATTAGCCTCCAAACGATGACACCATTGCATACACTAGCAAGCGTTTGTTGCAAGGACCTTGATATAGCTGTCTCTTGTGAGACTAGGCCGGGGCCTAGCAAACACAGAAGTGGATGCTCACAGTCAAC
ENSMUSG00000027002	Nckap1	E002	0.000179928	-0.0922912					AGGGAAACAGAAATGGGTTCATAAGCAATTTTGCTGATCTCGACTCAGTGAGCCGTGTACATTGAAGCTATGAACGGCAGCTCTGTGCTATACAATGCAAAGCAGCAGAGGCTGTCTAATAGCAATCAGAAGGCAAGATGTGCCACTCTGCCATCCACGCCAAACACAAAGCAGGGCACGTGTGGACTTCCTACCTAGCACTGACCCATCGGTAACAACACAGCCTAGTTCCATGGCCACTCCATTTTTGTTATT	TGTGATACAGTCTAGTGTTTATTTATGTTATGGCAGGTACACTTGAATTTCAAATGTTAAAACATATAAAAAGTGATTCGGGACTACCATCTGTATCAACAGTTGCCAAGTGTCTGGTTGTTTATTATACAGCAGGGTAAAGGCAGTGCAGATGCCAGCCGGGCAGCACGGGATGAGATGTTTCTACAGTAGGCTTTCTACAGGCGGCGGCAGCATGTGCTGCTGTCTGAGAACCTCGGAACCTGCTTCCGATGC	CTGAAAAAGTTAAAAAAATATCAAAATTCAAGTTACTCAATGGGGGTAGAAAACAACTCTATGTTCTTCTCATTTGAAACACACACAAACCATTTTACTTCAGAATCTAAAATGAAAATGTGTTACAGTGAAGCCTATCAATATACTTTTAAATGATATTTTCAAGTTTATCAATTAATCAATAGTAACACATAGAAGACACATCTTAAGCAATACTCTAAACATAAAAGTGAATACAAACGTAATACAAATGTA
ENSMUSG00000002028	Kmt2a	E041	0.000197132	0.245286					GGCTTTGACAGCTGTTGTGTCCCCAAGAGTCACAGGAGCAACATCAGCCCCAGAATCAAGTGACGAAGACTTCTTCCGCCCTGTTGCTTTTTTGGCAGAAGATGAAGTGCCAACATCTTCTCCAGCAACCTTCTCTTTGGAAACCCGACCCACAGGATACAAAGCAGAGCTACTCTGAATGTCTGAGCCCTTTTTCCTTTTCTCTTTCCTTGATTCCCGCTTATTCTCCTTCTCTCGCTCCCGGTCTCTCTCTCT	CACTAGCGGCAAGAGGACTAACGGGAATGCTTAATGAGGAGGAGACAGAAGACGGGGGAGTGAGAGGTGACAGCTCAGAGGTGCTAAGCCTTCCGCTTCTTGTCCTCATGGAGTGAGAAGGTGATCTTGGTTCAGACCGAATCGGACTAAACACTTTCCTTTTCCTTTTTCTATTAGATACTCCCGAAGAGGACGCTCCAGAAGAAGTTCGATTACTAGGCAAGGTCACAGACTCAAATATTCTAGAGTGTGCCT	CTGTGTATAGAAATTAAACAATGAAGAGCATATATTTAGCTGTGTAGTTCAGGTCTTAGTTAAGCTGAATATAATTTAGCACAGGCCATTTTGTAGCGAGCTCATTGGGACTACTGAGTCAATGCTACATCTTAATTGTGCTTAATTTCTTCTCACCAAATATTTACCTCAATAACACAGTGACACCCCACCTAAAAAAAAAATCTAATTACTTTTTTGACATAAAAATCAAAATAAGGTTTTCAACTGAAGTGA
ENSMUSG00000014602	Kif1a	E001	0.000197268	-0.0867706					GGCTCTGTATTAGCCAATCACCTACGAGTGTGAGCTTGTAGACCACTGGGCTCTTGACTTGTTGATAGACTTTGGGTTGTGTATCCATTTTCTTGAAACCCAAGACTCAGTATAGACCCATGAACCACTAAGGCCCCGGGAGAGCCTCATATTAGTGCCTTAGGAAGTTCTGAGACCCTGAGGCCTGTACACACCCTGTGGGCCAGAGATTCTGAGGGACCACACCCCAAAAGGCCGCTGGGGGAAGGAGCTGCT	ATGTGTGTTGCATGAGAGCCACATTTATTTCTTAATTGGACAGAGCCCTAAGTGCACACAAACAGTACAGGAGCCTACAGCTAACACTCGGGTGTAAACAGCAGGATACTAGTCATTACGTCAGGTGGTTATGACACAGGGGCCAGGGGGAGCCCACAGCAACCACATATGTACAGGTCAGGGAAACAGCCTCTGAGTTGCAGGGGCCCCTCGGTATAGACAAACCACAGGAGGTCCAGGCTCAAGGAGAGACTC	GAAACTGCTCACACCACCTTTATTGCTCCATTTTGGGAACTGTTCCCTCAGAAGGGTGACTTCTGAATTGTCTAAGTCTCAGAACTTGCACAACCTCTCACACACGTACCATGCAAGGTGCATCTCAGACAAAACTGGCCAGGACGGAGTTTCCCTGTGCCAGGCTGTGAGGAGCCATGGTTTGTTCACGTCCCTCCCTCCCTCTGCCCCTTGCAGGCTGGAGATACAGGTGGGAACCAACAGGGCCAGGCTGAA
ENSMUSG00000030729	Pgm2l1	E019	0.000197268	-0.0862766					TACATGGAGAGATCTAGACCAATAAGATAGATAGATAGATAGATAGATAGATAGATAGAGCAAGCAAGCTTAAAATAGAAGAGAATGGCACATTGTCTGCCTCTCACAAAGCATTTGTTTAGTACCAGGTAGAAACAAAATCAGTATTATTTTTAACTATTCAAAAAATGAGAACCTGTACATTAATTAAGAGGCCAAGACAAGGACAAAGTGACCAGAGTTTGCTTTCTAAATTTTCTATCAACAGAACCCTAA	GAAAATAAAAATAAAAGGAAACTATCAGAAAGGAACACAAGTTTACTACGTAATTCCTAAATTCCCAGCCCCACCCCCACCCCCGACCTGCAATTGCTGCTTTTTCCTGGAAGAACACATAATGATCTTATAATAAATACGCATTCTAGGATATTCTCTGTCTTCCTAACCTATACTTCCAAAGTGTTAATGCCAGATTAATTGGCCTGCAATATATGTTACCCTTGAGCCTTATAATATTGTCTGATGTATAAG	GGCATGAGTGTCTATGCACTTTTTATTGTTTCAGACACTATAGTTCATGAAGTTTGCTGTCCAAACTGAGGTTTTTAAAATGTGGGCATAACTTACCCTAGAGTTTGCTTGCAGCCTTAACTCATTTTGCTTCAGCGTTCTGTGGATTATTTCTTTGTTGGCTCATCTAGAAGAAGTCCCAGGGGTTGAGAACTCATATTAAAATAATAGCCTGAGGCTGCAAGGGAGACTGGTTTCCCGGTGGGGAGGAGATGA
ENSMUSG00000003153	Slc2a3	E014	0.000215523	0.424789					ACCATTAAAAAAAAAAATCACGTATCCTTTTACCATAAATAGGAAAGAGAAAACAAATTGTTTCTATTTCTTTCTGGGCCCTGCCTGTATCATTAGGTACCGTATGAACTACAGTAATATCTGAAACATGTACATATAAATACACAATTGAACACATGCCAGATCTAGATAGAGTGCTTCACGTATGTCAGTTCATTCATGGCGCACAGAGCTAGCTAGCGTCCATTATTATTATAATACATAAAACTGTAAGGG	TGCAAGGTTAAAGACAAAGTGGTTAGTAACGCGCGCGCGAGAGAGATCCCCTGTCTGTCTCTCCTCATCCTTTTGCTCTTCTGAAGCCTCCGTAGATGTCAATCTCTTTCCTTTTTGCTGCTGTGGGCTTGTGGACTTGAGGGACCCTCCTCACCACTTCGCTATACCTTAGGGTTTCTTTTTATTCTGTACTGTGTTTGTGTTTGAGTGTCCAGGTGCCAGTGTGCCACAGGGCACATGTGGAGTTCAGAGGAC	CTGCCAAAGCGGTTGACAAAGAGTCCAACAGAAAAAGAGCCAATCATGCCACCAACAGAGAAGATGGCCACACATAAGGACCAGAGGGCAGTCAGCAGTCCCTCACTTGGTAGGTCTTCTAACCGCTCTTCCAAAGTGTAGTTAAGAAAGTCCTTTAGGATCTGCACGAAAAAATGCACAGTGTGAGGACAGACCATTAAATCTCGATGAGAGTAGTAGGCAAATCCTAGGGTGGCTTCCTTAGAGGCCAGGATC
ENSMUSG00000083405+ENSMUSG00000034158	Gm15725,Lrrc58	E005	0.000229079	-0.0915691					TAATCCTAGTAAGATTATGGAAGCTTATTATAGAAATTATTTCAGAGCAACCTACAACCTGACACTGTGTAAAACACTTGGAAATATACTTTAACCAATTAGTTGAACAATTGTTTAGATAACACCTGGGTTCTGAGGGCCTGGAACTCTGTAGAATGGGCTGCTCTGGAACTCAGAGATCCACCAGGTGGGAGATCTTCCAGGTGGCAATTCCAGGGGTCCTCCACCTCCCTAGTTGCTGAGATTACAGGTGTA	CATGGATGACGATGCCGCTGCGCTCGTTGTCGACAACGGCTCCGGCTTCGCAGGCGACAATGCTCCCCTCCCCGGGCCGTCTTCCCCTCCATCGTGGGCTGCCCTAGGCACCAGGGTGTGATGGTGGGTATGGGTCAGAAGGACTCCTGCATGGGCGACGAGGCCCAGAGCAAGAGAGGCATCCTGACCCTGAAGTACCCCATTGACCATGGCATTGTCACCAACTGGAACGACATGGAGAAGATCTGGCACCAC	CTAGGCGGACTGTTTTACACCCTTTCTTTGACAAAACCTAACTTGTGCAGAAAAAAAAAGAGAGACAACATTGGCATGGCTTTGTTTTTGTTTTTTAATTTTTTTTAAAAGGTTTTTTGTTTTGTTTTGGCGCTTTTGACTCAGGATTTAAAAACTGGAACGGTGAAGGCGAAGGCAGTCGGTTGAAGCAAACATCCCCCAAAGTTCTACAATGTGGCTGAGGACTTTGATTGTACATTGTTTTTTTGATTTTGT
ENSMUSG00000020893	Per1	E025	0.000246973	0.575021	recognized	373			ATCTTAAGACTATGTGAAAAGCAACATGTGGCAAGGCTTCCCTTGTAAAGAAGAGGTTTTGTCCCAGGGGTTTGGGGCTCTTGGCGGAGACTGAGTACCCTCTTTTCTCCTGGAATCATTTTGCATGGAAAGAAGAGTCCATGTCTTCCTCTTGGCAAGGAAGCAGCCTTGAGTACCTGGGGTCCCACGCCTTGGTGGTTGGGCTATAGGAAAGGGAGGTTGTGTGTGGCTGTGGTGACCTTTCCTTTATCTCAC	TGAGCGAGGGAGCCACCTGGGGCTTCCTTGAGCTGTCTTGTGTGCAGTCAGCTGCTGGGGGTATAAAGTGATGGTGAGAGAAGATGTATCTGCTCTGGGGCCCAGGTGATGCTGTCTTCATCATCAGGACCGTGTTTAGTTAGATTTCTAGATAGCATCTCCCTATTAGGCCAGGGCTCCAGGCTGCAGGCTGAGGAGGGAAGCCTGGGGGCTGGCACTGAGACAAGCAGGCAGAAGTGCCTGGTTTCAGGTAAG	TCCTGTGATTCTTCCCCGCCCTTTCCCTACTTCCTGTCTTCTGTATTTCACATGCAGGGTGAGCAGCTTTCTCTGCCTGGCCCTTTCCCTGTCCTCTTAGTGTTTCAGGGCAGTAGAGGTGGCCGGCTCCTTGTTAACCCTGGTCTTTCCCCACAGGCTGCCACCATGGCCCCATTCCCCCTGGTCGCCGACACCACTGCCGATCTAAAGCAAAGCGTTCCCGCCACCACCACCACCAGACCCCCCGGCCCGAAA
ENSMUSG00000039953	Clstn1	E025	0.000250248	-0.0637571					AGGAGGAAGAGGAGGAGGAGGAGGAGGAGAGCGAAGATGGGGAGGAAGAGGAAGACATCACCAGTGCCGAGTCTGAGAGCAGTGAGGAGGAGGAAGGAGGCCCCGGAGACGGCCAGAATGCCACCCGACAGCTGGAATGGGATGACTCCACACTCAGCTACTAAACCCGCACTCAGCGCCTGCTCTCCAGACTCTCTCCCAGCCCCACGGGTCCACGATGTACAAAATCATTTTGACCAGCAGGTCTGCAGACCC	CACGCAGTCAGTAACCATTTCTCTTATTTTTAAAAGTTTTTTTATTTTTTTTTCCCAAACTAGTGCATGTATAAAGTGGGAGAGCAGAGGGGGTTAATATGTAGATGGCCAACCGACTTTTTAATATTTTGTAAATAAATTGGGATTCTGTGTGTCCTCTGTGCTAGTAGTCCAGGACAGGAATGTAAAGTCAGAATGCGGGGCCAGGAGGGCCTCTTCCTCCCTCTTCCCTCCCAAGAAACCAGGTTGGAGAGG	GCCTGAGTGGGGTCCATTCTGTCATGTTTGTTGGGTACGGGTTGGGGCAGGGGTTGAGGGATTTATGAAGATAGGCTGGGCTCAAACTTAAAGCAATCCTCCTGCCTCTGCCTGCTCAGTGCTGGGATTACAGATGTCCACCATGCCGGGCAAGGATTATTAATTTTTATGGTACTAAGGAATGTACCTGAAGCTTTGCACTTCGCAGACAAGGGCTCAACCAGTACACTGTATCCCCCCAAGTCCCCTTGTTAT
ENSMUSG00000029467	Atp2a2	E002	0.000289867	-0.0888572					GTTAGGAATAACTCGAGTTGTTTATTCTGAAAGGGGCAGGAGTGGAGGTCAGAGGACAAGTTTGTGGATGGAGCTGGTTCTCCCATGGGTTCTAGGAGTCAAGCCCAGGACTCCAGACTCATCTTAAGGGAAAGGCCTTTACCTGCTGAGCCATCTTGGCCCTGGATGCTGTCAAAAAGCTGTCCTATTACAGGAGCTGACAGGACTCATTTGAAGCTTATCTCTGCCAAGTAAGGCCAGAATAGCAGTTTAAGG	AGGGTTTATCGTAGAATAGATTTATTTACCTGAAATCATGTCTGTGCAATACCTGTTACCAGCACAGAAACTGACCTCTATTTACAGACTACAGTCAAACATGCGCTGTGAGAAGCTGTGAGCAACTGAACTGACGCTGAGCACTTTATTACGATAAATGCACACAATACTTGTATTGCACCAACATCTGTCTACTGCTTCTGACTTCATTAAATAAGTTACAATAATACAGTGTGGAACAGCTGGCTGCACACC	CTGAAAAGGAAAGAGAGAGGAAATCAGCTTTTCGAAACGTAGAGCAATGTTAAGACACAACAACAGGGACAGACAGAAAGAACACTGCATTTGGTCTAGATGCAAAACCAGCATTTCTGACGGAGTGTTCCAAGTGCTTGCTGCCCAGGCACATCTAGAAGCAGTGGCTTGGTGACTGCCCTGGGCCGCCTCCTACCAAAGTTCCAGGAGGCAGAAACTAGAAGGCATGTCAGGTACAGGGCTGAGAGCCATGCA
ENSMUSG00000019923	Zwint	E020	0.000345971	-0.0727474	recognized	67			TGTCATGATCAGAATCCTTTACTAATACATTTTAAGATATTCTTCTGAAATTACTACAATTTGAAATATTAGATTGAAAATGTTGGCTAGAAGATAATAGTTCACAGAGCTCATTGTTAATTTCACCTTTATTTCCTCAGATGAAAGGATGAGAAGAGAGCCGTATTCATACCCTGCTTGGGCTGAGACCAGATTGGTTCCTTCACTGTTGTATCTCTAGGCCTAAGCCTGGAAGTTTGTTGCCTCTGTACAATC	GTCCTCTCTTTTTCTTTGTCTTCTCTCCCTACCAGATGTGAAAGCAACTTTATGCGCCTGCTGTAATTGTTGTCTGAGGATTACTGCGAGTAAGCTCACCCTTTGTAGTTACTAAACTGGCCGGCTGGCTGGGTCAGCTCCGCTGTACTGGTTCATAACCCGGCTTCAAGTTGACTGATTCAAAGGGGCCTCTCTTGGCTTCTGACTGAACTGCTCTGCTTGGAAAGTCTGATGGACTTCAGGAACAGAACTGTA	TCCAGTGTCCTTGTTGCATTTTGTATTCTTTAAAGTATTTAGCCAGGAGTGGTGGCTCACGCCTTTAATCCCAGCACTCGGGAGGCAGAAGCAGGCGGATTTCTGAGTTGGAGGCCAGCCTGGTCTACAGAGTGAGTTCCAGGACAGCCAGGGCTACACAGAGAAACCCTGTCTCGAAAAACCAAAAAAAAAAAAAAAAAAAAAAAAAAAGTATTTAGAATACTGGACTCAACCAATGACCTCTACCAAAAGGGC
ENSMUSG00000015222	Map2	E040	0.000346624	0.117877					ATTCCCTGAGCAGGAGAAATTTCCTTCCTCATTCGCTGAGCCTTTAGACAAGGGAGAAATGGAGTTTAAGATGCCAAGTAAGCCTGGTGAAGACTTTGAACATGCTGCCTTAGTTCCTGACACAAGTAAAACTCCTCAGGATAAAAAGGATCTCCAAGGCATGGAAGGAGAAAAGTTGCCTCCAGTTCCATTTGCGCAGACTTTCGGTACCAACCTGGAAGACAGAAAACAGAGCACAGAACCAAGCATAGTGAT	TGAAGAATGAGAGAGTCTCAGAAGGACCACGACCCTTTGCCCCTGTCTTCTTCCAATCAGATGACAAAGTGTCTCTGCAGGACCCCAGTGCTCTAGCTACTTCCAAAGAGAGTTCTAAAGATGAGGAGCCACTGAAAGATAAAGCAGACAAAGTGGCAGATGTTTCCATCTCAGAAGTTACCACTTTACTGGGAAATGTTCATAGTCCAGTTGTGGAAGGCTATGTTGGGGAGAACATTTCAGGAGAAGTAAAGG	GGCCAAGAACACACGATTGATGAGTTAAAACAAGACTCCTTCCCTATAAGTCTGGAACAAGCAGTTACAGATGCAGCCATGACCTCCAAGACCTTGGGAAAAGTTACATCTGAGCCAGAGGCAGTAAGTGAAAGGAGAGAAATCCAGGGACTTTTTGAAGAGAAAACAGCTGACAAAAATAAGCTTGAAGGCGCTGGATCTGCGACAATAGCCGAGGTTGAGATGCCGTTTTATGAAGATAAATCAGGGATGTCT
ENSMUSG00000027273	Snap25	E009	0.000346667	-0.115728					CATTGTAATCTCAATCTTCTCTCTCTCTCTCTCTCTCTCTCTCTCTCTCTCTCTCTCTCTCTCTCTCTCTCTCTCTCTCTCTTTCTCTCTCTCTCTCTAATTCTGTTTCACATAGTCATTTCTCATGTTCTGTTGGAAACCCCCAAAAAATTCATTCCACACTATCATCCCTTTGTCCTAACCAGAACAACTCGATCGTGTCGAAGAAGGCATGAACCATATCAACCAAGACATGAAGGAGGCCGAGAAAAATTT	ACAACTGGAACGCATTGAGGAAGGGATGGACCAAATCAATAAGGACATGAAAGAAGCAGAAAAGAATTTGACGGACCTAGGAAAATTCTGCGGGCTTTGTGTGTGTCCCTGTAACAA	GTAGGTGCTGCCTGCCTGCCTGAAGCTTTGGTTTTCCCAAGGCTCATCTCCAAGCCTTGACTAGCTCATTCCTGCAGGCTCATAGGCAGGATGAGCATGTGGCATGCAGAACAGATCAATACCGTCTCCAATGCATTCATCTCATAGCATAGACAATATTAGTGAGAGTTACTGTTGATGCATTAAAAATCAGGCATACTCCAGTGAAAGCCTCACTGTCAGCAATTTTTATTGATTAACGTTTCAACATTTTCC
ENSMUSG00000022054	Nefm	E003	0.000364744	-0.0802813					GTATCTTGAAAAACATTAATGAGAACATCAAGGGAGGATATCCTTGGGTTGGTCTCATTAATAGGAAAAATAAAGACTTGGAAAAATAATATGCTATTAATTTATATGTGGGTGTAAAGGTCTAAGGCAAATGGCTTTGGAGAGAAAATCGTATTATTTTCCCTTTGTCCAGACTACAGCTTTTCACCTAAAACTGTTTAATATCTAAATCAAAGACCCTTTTTTGGGGGGGTATTATTTCCCCAACTAATAAAA	CCCTTTATTTACCCACGATGCTTTTATTTTTATTTCAGAACTATAGTTTTAAAGTTTCAGGGTGAAGCTTGGGCTAAGCACATGTGTCAACACATGAAACTGTCCTACGCAATGCTTTCCAGTGAGATTCAGAGAGCTGAGCCGTGCAGGTCACTAACAATTCCCAGAGACAGTGTGCTCCTGAGTAAGACAGCTAGCTCTCAACAGCTAGCTCTTGGCAACAGGTACTTCACTGAAATGACACATCACCACACA	CTAAGGAGAGAACCAAAGAGGATGAGACATCAAGAAAGACTTGTTTGGTCTTCTAATCTTCATTACCACAAGCTTAATGTAGTGGGCACTTTTGAATAAATAGAACCACGTAAGGAAATACTCTTTCTACCAGGGCAGTGAGTGCTTACTGCCATTTCATCAACATGTTTATCATATCCTGGGGCAGATTCTCCAAGAGTGCCAGACAGTCCTCTGCTGTAGTGCCTAGCCACTCCCAGTAGACAACTAACCACA
ENSMUSG00000041444	Arhgap32	E032	0.000364744	-0.124757					AGCTCCAGGGGCATCCATCATGTTCTTACTATTACTAATAAATCTAATCTGAGCCTTATTTCTTACTGAGTTCAGTTTCTTTTAAAACATACATTTATGTATTTTAAATGCTGTTTGGAGAAGTCCCTGAGACAGTTCCAAGGGCAGGGCCTGCACATTTCTTACAATGGTAAAACAGTTTTTAAAATGTAGGGTCAGGTTTAAAAAAAAAATCCCAAGACTAATTCTGTGCAGAGGAGGGACGTGGAAGGTGAG	TTAATGTATGCAAGATAATGTTGGTGTGCACAGAGGGTCTTTTCCTTATCTGATTAGTACTGTTAATGTTCAGAGATTTAAAAAAAAATGATTGTTTTTACAGTTTAGATTCTGAGATAGCGAAACCTGATTTTCAACCATGCCCTGCATGAGAGACGCATCCTAGGAAGTCTTAGATCATACCTTTGAGTTCTTTAATTTATAGAGTGTTTTTTATGTTTTAATATTTTTGTGAACTGGTGTAAATTGTTAATG	GCGTGTTTCCTATTATCCTTAGATGTGCATATATTCTTCCAGATTTTACCAGAGTTAATAACGAGTGCTTGTCCAAAGAACAGTATGCACTAATAGTGTTGAAAGTGCTAACAGCACTAACAGCTTAGTGATCAGTTCGTATGTACAAAGCTGTCTTAAATATCTTGCATACATTAGTATTAACTCATCAATCTTTCTGATCAGTTTTGTGAGCTGGAATTCTTCAGCACTATGAACACAAAGGAGCTGAGACCA
ENSMUSG00000020719+ENSMUSG00000093273+ENSMUSG00000093133	Ddx5,Mir3064,Gm25994	E001	0.000389646	-0.0633315					ATACTAATGCTGGCAAACATTATCACCAATGGCCACTCCACTCTCTCCCGGGTGTGGCTGGACAGACAGGGTGACCAGGTCTTAAAAAGGGCTTCGGGAATTTATTAACCACCTCCTTAAAAAGAATTTTTTTTTTTTTTTTTAAAGATTTGTGAGTTGCTGTCTTCAGACACACCAGAAGAGGCCATCACTACAGGTGGTTGTGAGGCACCGTATGGTTGCTGGAAGAGCAGTGCTCTTAACCTCTGTACTTCC	GGGGAGAAAAATCACATTTATTAGTTAAGACAACCACAGGCTGGACACAACACACATGCTAAAAAGTGGACTGTCTTTTAAAACTTCAAAGGTAATTTTTTCCAAGCCCCACAATCATTTCCATAATTATTTACAAAATAAAAGGTCCACATTAAGACATTGAACAGTAAAATATGTAATAAATGCTCCAATCTACACCTATACTTAAAAATCATGAATCTGACTAGCCATGCCATTGAAAACCACTCAGTACTA	CAGTCTTCAAATATCTTTTATTGGAAGGCCATGCATTGCCTTCATTTATTGTATTTGAAATCACTGTACAGTTACTTTTGTGAAAACACTGCCTGCATTTTCTAGTACAAAAAAAACCTAAAAATTGTTTCAGGAATGTAGAGAAATATCCAACTTAAATAGCGAAAAAAGTGCACCATAATTACTGCTGCACTGCAGTCATTTCTGCATTTCCCATGTTTCTTAAATAACTATCTTGTCTGATAACACACAATA
ENSMUSG00000026959	Grin1	E034	0.000404592	-0.386335					GGAAGGCAACTAGGAACAGAGATGGGGCTGACTTTTCCAAAACCTTGGGAGATCTCAGCTCAGACCGGATTCCTCTTGCTCCTATAGGAGCAGCCCAGACTCTGAAGTGACCAGGTGGGCAGGCTCCCTCCCTGGGTTCCGCTAGGAAACCCTGGCGGACCTGGAGATTCATGCACTTCCCAGAGCAGCGCCTCCTGTGACCGTGCTTGTCTTGAGGATGCGGGCCAGGGTCACGGCGGGTGGGCCATGGGCACC	TGATGAATAATGTGCACAGAGAAAATATGCAGACACAGAAGAAGATTATAAACGGTTGAAAATGACGGCGCTAAAGCAATCACACCACCTCCTCGGCACGTCTGCAGACGGGCACGTACCTGGAGCTCGCAAACACCGAGACCCGGGGTGGGGCTAAGGACGGGGGTGGAGCTGAGGGGGGAGGGGACACAGGGGCAAGGGCCACAGAGGCTCCCTGCCTTGGAGCTATACTCTTGGAAAGTCTTTTTCAGAAGA	CTTGGACTCACGCTCCTCCAGCAACGTCTCCAGGCGCTTCTGCGCTGCCCGGCCCTCGTGGTCATCGCTGACCAGCAGGATGATATGGTTCCAGTTGTAGACGCGCATCATCTCAAACCAGACGCTGGACTGGTGGGAGTAGGGTGGTACGGTGCGAAGGAAGCTCAGGTGGATGCTCTGTGGGTGCGACCGAGAGGCTGAGGCAGGACCAGGCTAAGTCTGCTTTCCCCTCTCCCACTGATGGGGTCACTTCCT
ENSMUSG00000029363	Rfc5	E001	0.000404592	-0.152441	recognized	198			AGGATGGAGTCAGGCAGCTCACACTGGACCAGTGTGGACCTTCCTTCCTCCCATGGCATGTGCAAGTAGGTCTGCGTGACCCCACTTCTGTGGTGCCGGCCTTACCTCGTCTTCATCCGTGGTGAGCAGCCTTCGTCAGTCTAGTTGTGTTGAAGCCAAGTGCAGTTGTGGATGTTGCTGGGGTAATAAAGGCAAGCGGGCTCCAGAGCCTCTCTGGTGGCGGCCAAGCCACACTCCCTTAACTGGGAAGTACCT	GGCCATTTATCAGCATATTTATTTGTATTTTCTCAGCAGATAGTAAGGTACAACTGTGTTTTCTCAATTGTCTCGAAGAACCAGAGTTCTTAAGTGGCCCAGTTGTGGAGCCAAGTCTAAGTCGTGTGGAGTCAGTGCTGACATCACTGGCTTGTGCTGTCTGTCACATGTGTTTGTCTCTGCTGCTTGACCTCATGGGATGTACCCTCCAGTTCAACTGCCCAAAACAGACAGCCCCTTCCAAGCACCGTTCTT	GCCTTAGAAAGTTAATATATTTTAAATTATTTTAAAAGAAACTCAACATCTTATTCTTTGGCCTTTCTTAATTGATGCTTTATGGAGGCAGTGTTAACATTGTACAGTGTATGCATAGAGGAGTCTCCTCTATTTGAAGAACAATGCAAAATGAGGCTTTCATTGAAGGGAGAAAAGAGAAAAAAAGAAAAAAAAAACCTGTCTCTGTTCTTTTTTTCTCTCTCTCATTAAGAAGCAAAACAAAACGTTTAAACC
ENSMUSG00000042700	Sipa1l1	E025	0.000406653	-0.116631					TCAGTGAGTGATGATTGCCCGGCTGTGGGAGCAGGGCCCTTAACTGGACGAGCGATGTGCCTGGGTTTTTACATGCAGTTTCGCTGCGCATGTGTTTAGGGCAGCAATAGATGTTGGTGCCATGACCACACATGATGTGAAAGACCTTCCTTGTCTTACGTACAGAAAATGTAATCCCTTTGTGGGAAACCTTAAACTTCAGTCAGGCCTTTCTGGGCTCTGGCCTGGCTTTTGACCCCTCCTGTTGCCATGTAG	AAAAAGAAGACAAGGCCCAGCTGCAGGCGGAAGTTGAGCACCTGCGGGAGGACAACCTGAGGCTGCAGGAGGAGTCCCAGAACGCCTCGGACAAGCTGAAGAAGTTCACAGAGTGGGTCTTCAACACCATAGACATGAGCTAGGGCCAGCCGAGGGGAAACGAGAAAGGGACAGGCTGCCCTATGTGGGCCCCTAAAGCACCCATTCACGCCTTGGAAAGTATTCTCAGAGTCCCCAGCGTCCCAGCCTGTTCAT	AAAATGGATTGGTTATTGCTCGGGTTTTTTCACTTGAGACACCACCCAGGAACTCCCTGGTCCTTGCTTCCTGATCTTCTCATCAAGCTCCATTAACTCTAGAGAGGGTGCTGGAGGGCCGGTCCTTTTCAGAAGGTAATGGGCATCTTCGCTCCTGTTCACAGGTCTGCAGAGAATCCCCACCCTCGCCCTTTCCGGGTGTGATTAGTTCCAGAGCATTGTATGGTCAGTTTGCTTCTTCACTGTCCATGTGTG
ENSMUSG00000029765	Plxna4	E001	0.000416116	-0.0781617					CTCCACTCTCATAAGGGAGCCCTTCCAACATGTGCTTGAGTCTTAACTTTAAAGATATAGACAAAACAAACGGGCAGAAGAGGAAGAAACTGGCTAATTGAGTGTCCACTTGTTTTTGTGTTATTGTGGGGGACAGGGAGCTTGGGTTCCCCTAAAATCAGTTTCAGTGAAGTTTGAAGGAAGCCGAGAAGAAATTTGAAGGATTCAGAAATTCCAGGGGCAGCCCAAGGAGGAGGGAGGAGGGAGGAGGGAGGA	AAGCAATATTATTGAAGAGCAATGATCTGTAGCAAAACGACAACAACAAAAAAGTCTCTCCTAATATTTGAAATGTTTCCTGTAGTGATTGCTTTCTAAATGGGAGAGAGGGTGTGGCCCCCATCAGAGCTCTGGGGTAAGCTTGCATGGTGGTCCCAGCCTCTTTCTCAGGAGCTGCCCCTTTACCTCCATCTGCGATGGTACCTCAGCTGCTCAATTGTAAGCATGATGCTTGAGTTGGTTCTATGCAATCAG	CTGTGGAAGGATTACAAGTGCAAGATTACCAGTCTGAGTATATGTACCTGTGATTCTAGGGTACATAAAGATAGTATGGATATTGTCAGGGCATTAGTGTTCTACTGATACTGTCCTGGAAGCAAGCAGCCTGAGTGACACAGGTAGGGAGGGGTGAGAGGCATAGGAGCACCCATGTTACCAGACACCAACACATACACTGTCACATCTGGATAGTGTGTGCATCCCATTGTCTGTGAGAGACAGCTGGCTGGA
ENSMUSG00000020458	Rtn4	E007	0.000422395	0.0684547					ATCTTACTTTCTCTTTAAACTATTTAGAAATAGCTTTTTCTAGTTAGTAACACCTGAAGTTTTCTCAGATTTGATTTATATCTCGCATAGTAGGTAACTGCCTCTGAAACTGCACATTATTCTTTTTTCTTTAGGTACTTTAATAACTGTATTTATAGGGTACAGTGTGATGATCCCATACATTATTCATTGTTGCCTGGTCAGGGTTAGCCGATTAGCATATCCATCATCTTAGATGTTTTTAATTACTTTGTA	AAAAATTATGGATTTGAAGGAGCAGCCAGGTAACACTGTTTCGTCTGGTCAAGAGGATTTCCCATCTGTCCTGTTTGAAACTGCTGCCTCTCTTCCTTCTCTATCTCCTCTCTCAACTGTTTCTTTTAAAGAACACGGATACCTTGGTAACTTATCAGCAGTGGCATCCACAGAAGGAACTATTGAAGAAACTTTAAATGAAGCTTCTAGAGAATTGCCAGAGAGGGCAACAAATCCATTTGTAAATAGAGAGTC	GTAATAATCCATGCACCGTCTCACCAACTTCTTGGTTTACTATGGAATACAGATAACGTTTTGTGACATAACATTTATAATGTATCATGTCTACTGTGTCATGTTGATGAGAATCTTTTTTACTAGTTCAGTTTTAGTTCTGTGGGGCTGGAAAGATGGCTCAGTAGCTAAGAGCACTTGCTGATCTTTTACCCTCTACAAGACTTAATTAAGTTCGCTTCCCCATCACCGATGTGGTCTCTCACAATCGGCTAT
ENSMUSG00000074505	Fat3	E017	0.000423581	0.177445	recognized	377			ACTATTGGGGGAGACAGATAGAGATTGCAAGGAAACAGGGCTGACAGAAGGCATATCCTTCCATCCTCAGTTATAAATTTAGAATTCTCAGAAAAGGTCAAACTGAGATTTCTAATTTGCATGTGAGTGTGATGATGCATTCTTATAACCAGAAGAAAGCTGCATATAAAGCTTAATGAGGCACATACTATTGTTCTTCAGCATTATTGAAAGCTCACAAGGGGATTATAGTTGAAAAACATCTATTTCCACTAA	TGTAATGTGGTAGCTCACTTGGCGATTTATGTTGGAGGTGTCTTTGTCCAAGGTGCTGAGAACAGCTACCACCTCCCCTGGTGGGTCGCTCTCCTTCACATTTCCTCGGTACACCTCATGAGCAAAGACTGGTGCATTGTCATTTATATCTGTCACCTTGACTGAGACAAGAGCCATGGAAGAAAGGGAGAAAGCCTCTCCGAGGTCAGAAGCCACCACAAAGAAGGAGAAGGCAGGGTCTGTCTCATGGTCCAG	CTAAAGCACAGAGATCAAAGGGAAAATGAGTTACAAGAGGGTCATTAAAATATTCCCATGGAGATTAAACCTTCTTCTCAAGGTGCTTGTCTATACTGTGGTCAGCATTAAGAAAGAATTTAGATTCCATTCTAATTATTCTGATATTAAAAATGCATATCTTCTTTTCTGTGGTAAAAATGATATCAAATAAGATATCTCAATCCAGAATCTCAATCATCAGCAACAACAATATAGCACTATGTACACATTTGA
ENSMUSG00000054423	Cadps	E002	0.000429366	-0.0896331					AAATAAAGAAAGCAAGGGGACACATTTAATTTCTTTCAAACTCAGGTGATTATATTGTTGACAGGAGCTGGGGATGGAGAAGAATACTCCATGTCTTAGAGAATCTTGAAGGAAAAGGCTTTAACAAATACATAAGAATCATATATAATTGGCACACACTTTGTTTGAATGCAAACACTGCTGTTAAAGTAGTGCTTAAAAACAGTTTGTTGGCCTTCTCTCCATACAGGAGAAACATTCCTCTCGTTTACACTA	GGACATTTGAATAATTATTTATTGAGGAGCCACAGTTTCCCACACTTTTACAACTGTAGGCTTTTATATAAGGCAAAAAGCAAGATGGATCCACTACTTTCCACAGAAAGAAACAGCTCTATAGCAGACCCCAGGGTCGCTCAGTTACAGATCAAAGTGCAATGTACATGACAGATATAAAAAACAGTGTGGAACAAAATAATTGAAGTTATGGTTACAGTCTACTGAAGGAAATATCCATATCTTATTATAAAT	CTATGGAAACGAAAGATAAAGAGGTAAGAATGATCTCATCCCCAAGGTGAGGAGGGAGAGGATGCAAAGCAAGCACAAGTGCGAGGGAGAGTCATGGCTTTTGGTTAAGTGTCACATTTTATGAACTGAAAAGTAAAAGCCGCTTCATTCAGATTTCTCTTGGACTGAGAACTGAGACTCAACCAAATGACAGAAAATGAGAAACCGTGGCAGGATAAACTGTATTAGATGAGACAAAGCAAAGAACAGAAGCTT
ENSMUSG00000058230	Arhgap35	E001	0.000434825	-0.140834	recognized	464			AGGAAGGGTCAAGGGAGGTCAGGTTAAGCGTGCATGTGGGGATCCATCAGAATCTCAGCAGGCCTGAGTTACAGTATTCTAGAGCACTGGAATGGAGGCAGAGGAAAGAGCACTTGCCACCATCTGGGATCCAGATGATGGGATGATCCTACTTCACCAAGGTGTTCTTTGATGGGCCTTCGTGATAGCCATGTGCCCACACTCACAACCACTCAAACTTCCTTACACAGATGTTTAAAACCAGCTGTCTCAGCA	TCAGGCCTGTTTTTATTTATGGTTTTTTTTTTTACAAGATTGATTTATTAACTATGATACATATCACATAAGGCCTTTTCTGTCTTTTTTTCTTTTTTAACACCATTCCCATTGAGACAAGTACAATACTTTGTAGCAAATACATAATCTTAAAAAACAAAACCAAACAAAAACACTTCTGTCAGAGATGTCTTGGCTGCCAGGATGGCTGCCCATGCACTAAACAGGCTGGAGCCTCAGAAACCCATGACGTAT	GGGGGCAGCCTTAGTGTTTGCAAGCACCTTATGTTGCCAAGTATTAGAGATAGGGAGACAGCCAGGACCTGGGCCAGAGGCCAGTCATCCTCCTCTTATCCTACAGAGATAAAGGCAGGGTGGCAGTCCACCTGAGGCCCTTGGGAACACTCCGTGTTATTTCTAAAGTGCAATGGTGCGACCCATGCCCCTCCTATGCTCAGGGTACCTTAGTGTCAGATTTCATGGCCCAGTGCTTAGATTAAAGTGGGGGGC
ENSMUSG00000020900	Myh10	E059	0.000442931	-0.112321			recognized	301	AAGAGGCTGAGGAAGAGGCCACACGTGCCAACGCATCTCGGCGTAAACTCCAAAGGGAGCTGGACGACGCCACTGAGGCCAATGAAGGCCTGAGCCGCGAGGTCAGCACTCTCAAGAACCGGCTCAGGTAAGTGTTCGGTGAGCCATGGAGAGCTGGCAGGCTTCATCTGTGGAAGCTGGATCCAGTCCTCTGGAATCCCCAGGCAAGAGGCAGGACGTTTACAGTAGTGAGCGGGAGAAAGCAGACATTAGAAT	CGGGGCGGTCCAATCAGCTTTTCTTCAAGCCGATCTGGCCGGCGCCAGCTGCACATTGAGGGGGCATCGCTAGAGCTGTCAGATGACGACACAGAAAGTAAGACCAGTGATGTCAATGACACACAGCCACCCCAATCAGAATAGGCACAGGAGGTCAGAGGTGATGCTGAGGACAGGCCAGAACTCATCCCAGCACCAGTCTGCTTGAGCCCTGCACTCACTGCTCGGGAATGGCAAGCTCCCAGATTCCTTCCA	TTTGCGCCTGCTCTGTTTACTTGGAGGAAAAAGCACCCGTTGAGAACAAACAGACCTCAATAAACAAGAATAATCATGTGACCATGGACTCTGCTTCCGCACCTTCTGTTCTTGGTTTCCCATCTGTGGTCTGACTGGAGGGGGAATCACACACCTGAACCAAGCACACCAGGGTGGGGGTCTCCCAAAAACAGCAAACAGCCAACACCTGAAGGCAGGGGACAATGTACAAGTGTTTGGCCCAGTCACTGAAGA
ENSMUSG00000023036	Pcdhgc4	E012	0.000442931	-0.0631272			recognized	381	TATGCAAGAACAGGAGTTCAGTTCCCAGTACCACACATAGGTACACAAACGGCAGAGCTGCTGAGCACATGGGCTGTGCCAAGCCTTGGTTAGGGAAAGCTAATGCACAAATGGTCTAGTGTGGAAGGCAGGGACAGGTATTTGAAGCCTTAGAGGACCGCTAGCTAGCACATCTTGAGCACTTGCCACACAGCAAGCTCTAGTCTAGGCACTTTGGAAGCGTTTTCTCTTTTACTTCTTACCCAAAGTGGATAC	AGCTGCTGATGGGAGCTCTACCCTGGGAGGGGGCGCTGGCACCATGGGTCTGAGCGCTCGATACGGACCCCAGTTTACCCTGCAGCACGTGCCTGACTACCGCCAGAACGTGTACATCCCTGGCAGCAATGCCACGCTGACCAATGCCGCTGGCAAACGAGATGGCAAGGCTCCAGCAGGTGGTAATGGCAACAAGAAGAAATCGGGCAAGAAAGAGAAGAAGTAATATGGAGGCCAGGCCTTGAACCACAAGGC	AAAAATAAAAAAATGGTTTCTTCTGAAAGTGTGACCGCGTCTGTTTAAGAGATGGAACACAGAACATGTGGGTGGAGTCGAGTTGCTTGTCTTAAATAATAGACTCAAAGGGTCATAGTTGTTTGTGTCTTGGCTTTGTCTCGATCTATTTTTGAATTGCGTGTGCTTGTGCAGTGTGCATCTGACTGTCCAATATGGAGTGCATGTTTCAGATTCCCTGGCGTCTCTAATAGTATGTGATGAACTGTAATGGTG
ENSMUSG00000040565	Btaf1	E011	0.000442931	1.11906					CCTCTGCCTCCTGAGTGCCCAGCTTGTAATTTGTGTTTTTTAAGAGTACAGGAACATAATAGGAACTATGAATATAAGAATTTTGACGTAGGGCTTCTGAATATAATTATCAAAGATGACATGATTACATTTAAAGATGGTATATAGAATTCTTACGTGGTTTGGTAACTTCTTTCTACTAAGATAATATGTCCTAATATTGTGTGTGTACGTGTTGTGTGTATTTTTCCCTCCATTTTTGGACTGAACAGCTCA	TTGTAGCGCCAGTTCGTGAGACTTGTGCTCAAACGTTAGGTGTGGTTTTAAAGCACATGAACGAAACAGGAGTTCATAAGACAGTGGATGTGCTGCTGAAATTATTGACACAAGAACAGTGGGAAGTTAGACATGGTGGTCTTCTGGGAATAAAATATGCTTTGGCAGTTCGTCAG	GTAACTAACTCAGTTTTTGAAAGGGATTTTTCCCTTTTGGATGTCTTGTTTGTTGTGATGTTGGGATGGGTATGCTTGATCGCTTGTTTGTTCCTTTGTTTTATGATTTCCCTATTTATCTCCAGCTAGCCTGGAACTTGCTATACCTCAGAATTGCAGAGATTTTTCTGCCTCTGCCTTTTCTTTTTCCTCGTGGATTCTAAGATTGTGTATGTCATCATGCCAGGCTCAAGCTTGCCTTCTTGAGAAAGTGTC
ENSMUSG00000024122	Pdpk1	E003	0.000487829	-0.114376					CCGGGTGGTGAGGAAGTAGGTGCCGCCGACGTTGAGCCGGACCCACTTGGACACGCCACCGGGGCGCTGAGCCAGGGCGCCCATCCCAGCGCTGCAGCGGCGGCACAGGCCGCCCCCCAGCCCCGCCCCGAGGCCGCTCGGAGCCGGCGGCAGCAGCTCGCAGTGATTCTCCGCCATGATCCTAACAAGCCCCGCCACAGCGGCCCTTCGCCGGAAGCGTCCGTTCTTTAATACAGCCCCCCTGAGTTGTCCCGC	TAAAGCACAGATATTTGAAAAAAACAAAAAAAAGAAAAGTTGTTTCATTAAATTATATGATTAAACCATGACCAAATAGAAAATTTATATAATAAAGCCAGGAAAAAAGTTGTAAAATATAGTTTACAATAATTATTCACACTCAAGGCTGTACATCAATACATACAACAACGTGGCCCCAAACATGAATTCAATCCAAATAATTCATATATTAGAATTTAAATAACACAGACTGAACTAGAGGCCGACAATAGC	ACAATTATCAAAAACATGCTTTTGAAGAACTACTCACGGCCACGGCATGGAGAAATGCTTAAGAGAAAACAAGTCAAGTGAAAAAGCTGGATGTAAAATGATGAATGTTGTATGTGTTCCCAGTTTGGTTTAGAAAGCAAACAAGGACTAAGGATGCACATCAGTGGTAGAGCACTCGCTTAGCAATCCTGAACCTCACTATTCAATTCCCAGCACTGGAACAAAGAGTTAGGGAGAACAGCATCTACATCCAAA
ENSMUSG00000037996	Slc24a2	E021	0.000498094	0.164404					GCTCTTAAGCCCAGGCTGCTGCTGAAAGATACAGCTCTTATAAAACAAACTTTCTCCCCTAAACATCTGCAAAGAGATGGTTCTTGATCACTATCATATGCTTACCTAAAAAAGAAAGCCCTGTCACTTGCTAAGAATATGCCCATCAAAATGAAACCACTCTCAAAATCACTGGGTCTGTTTTTCCAAAAAACAAGCCAGTGCTGAGTCTGACATGGGATGCTTATATAACCTATATTTACATTTTTTTAACTC	TTTGCTTGGGCTTCTGGCACTGTCACCTTGATAACATTATTGCGAGATATCATTTGCTTCACCCATCTCTCTACTTGGACGTTGAACTTCATGAAAACCACATAGGCGAAATAAGCTGTTAAGAGGAGTAAGCTTTCCCACCACATGATAACGTTATCCAGGAAAAATGTGATCAACATGAGCAAATCAACGATGTAGAAGGACACATCCCGAAAGAGCGGCCACCAGGTCAGGTTTAGGATTTCTCTAGAAAAC	GGCATACTGCTCCTTGCTTCCCAGTCGATGATGCTTATGGGCACTTCTACAGTTGGGGATCTTTACTCTTCACGGGGAAAATAGCTCCACCTAAGTTTAAATAAAAACAACAATGGTAAGTAAGTCATACAATCTTACCGTTCTATAAAGATAACTTTGCAGATATGATGACGCCTTGTCCTGTGGCCTGTGTTCATGGGTAAGTTACTTAAGTTCTATGTGATTCTGGCACCTTAATTTATTAATTTAATTGGA
ENSMUSG00000094483+ENSMUSG00000092885	Purb,Gm22123	E003	0.000498094	0.0506783					TGTACAATGCCATTTTCTGACAGAAATCAACAAAGACCAACAATGCCTTCAAAAAGCTAGTATTTATGACTGACTCTCCATGTTTGCAGATTTCTATTGTCCCTAGTCCCTGGATGAGGGTCAGTGAAATGCTACAATTAACCCCCATCCTTCTGCTATCTTCCTACAGTGGGAAGAGAGGCCATGAACCATCCCCTGCAGGAGAAATAAACCTCAGAGATTGGTTAAGACATAAAAACCCACCACTATGACATT	TTTCTATTCAGCTAATTATAGCTTAGTAGCCACTGGTGAAGGATTGTGAAGACCCTGTCATTTCTACAGAATAGAAAGGCAAGGCTAGTTACTGCAATTCAGCCAAATAAAAAGAAAAGAGAAAAACAAAAAACAAAAACCAACCCCTTGAAAAGGAGAGGTACTGCACCTTTGCAAAATTGAACTGGCTCACTGCAGCTGAGCAACAGAACCACTGAAGCAAGAAAACAAGTTGGTCTACACAGGAATAGTACA	GCTTCCGGCGCGCGCCTCCCGTGACGTCACTCCGCCCCGCCCGCCGCCGCCTCCCGGCCGGAAGACCCACACACACCACGCCGGCGGGGCGCAGAGGTGACGTCGCTGGCCGCGCCGGCAAGGCGTTCTGCGGCTACCCCGGGCGAGCCTATGTTTCTGTCCGCTGGTTTTGGGGTCCTCTTTCTTGATGCTTTACTGACGCTCCCGGTTTCAGAGGGTTTAGTGTGTGACTAGATGACTCTGTTGCTTTGGGGC
ENSMUSG00000025314	Ptprj	E005	0.000513491	-0.128316					TAGCCCCATGCACCCACATTGCCACGTCCTGAGGTATAAACCTCTCATAGCTCAGAATGTGACTCTACTTGGTGACGGGATCTCAGTAGCAAAGAAGGTAAAATGAGATGCTGCGCATAAGGCCATAACCAGCATCGCTAGGATCCTCAGACCTGTATAAAGGAAAGGCCATATATGGACAGGAAGAGGCCATACCAGGAGGGAGTCCCTACCAGCCCTTGATCTCGGATCTCCAGCTTCCAGATTATAAAAATA	GTGTTGACATATTTTTATATTTGGTATTTGTAAGTCTTTAAAAAAAAAGTTTTTCAGGCCATTTTTTTCCTTTAAAAAAAAAAAAAAGCAACCAAGAGCAATACTCTGTACAAGTATAACAGACATTAGAAATGTGCATCATTCCAAAATAGTTACAAGAAAAGTACAGTTTAGAGTCCACATCAACACTTCTATTCTGTGCCCCAGGGAGAAAAAGCCACAGGTGTTAAACACACAGTTGCTACGCAGCAATCT	TGGCTCGAGGTTTTCATAGATTGTCATTGCCGTTGTGTTCTGATAGATGAGATCAACTTTTGAGTCTTTCTGGGCTCTGATAATATCCAAAACACACTGATTGAGGAAAACATACTGGTCCTGGTGGGAAAGGAAATGAGAGAGAAGAATAAGCACCAGCCCCAGGAATGAGAACACGAGACGATTCTTAAAGGAAAACTCACCATGATCCCATCTGTCCAACACATCCGTGATCTATAAACAACCTAATGACAT
ENSMUSG00000042700	Sipa1l1	E005	0.000527294	0.109581					GTGTGCTCTGTATATTTGCTCTTGCCGACTATGACAAGCTTTTGTAGGGAAATAAGTATCAATTTGAAAAATGAAACGTTTTAAAAAGTGAGTGTTGTAGCATAATCAATAAAGTCTTGTTCAGTTTTTAGTGTTCTCAGAATGCCCCCCTGCATTGCTCTAATTATCTGATTAGGTTGGTCAAACTTGTGGTCAGCACAGTGGCATGATGTCTCCATTCCTAGAGGTCCTGGGTGCCGAAGTCTGTACTTCCCT	GGAAGCGTGGGATTCTGGTGACCACAGAGCCCCAGTGATGCAAGCTCTACTCAGTCTTAGGGACTGAAGGAAGCCTGCTGTTAGAGTGAGGCACAGGGACTGAAGGAAGCCTGCTGTTAGAGTGAGGCACAGGGACTGTTGTGGATTACAATGTTTGGAAGATCTGGGTTCTCTGTCGTCTGCAAACAAGGCATCATTTAACCTTTTAAATGAAAAGGCTTAAGATCTCAACACCACTGCTGTATTTTCTGGAAG	GTGAGTAGGTGCTTAGTTTTAATTTTTTTTTTTTTATTTTGCTCTACTCATGGGAAAAAAACAACAGTGTGTAGTATACTGAGTGTTTTAGCGGTGACCTGAGATGCCTGTGAATCTCTGTCTTTCATGATGAAAGAGTTTTTCTGTAGGCTTTGTTGTGATTCATTTCTTTGTATTTTGGGGATGTTCTTTTCCCCTTTTAGGTATTGAAATCTTTTAAAATTAAATATTAGTGTTTCATTTTTTAAGTTAAAA
ENSMUSG00000022973	Synj1	E043	0.000566562	0.311245					ACATATACCCTTATATTTCTTTTAATTTGTTCCTTAGCCTTTTTATAGTTTCTAAAACCTGATTTAAAGATCTGACTTGGGCTGGGTTATAGCCTGAAACTTTATAGTTACATAGTTCCACAGCCAAATGTCATAACTTTAAAATTTTAGGTAGCACATATTTATCTTTAAGAGTTGAATTTATTTTCACATAAAATATTTTTATTAAGCCATCTTGCTCTATAATTGAAGATTTTAAAATTCACTGTCAAATGT	TGCTCTGTCTCTACAAAGTTGGCAACATGACCATCATCGTTGGTTCCCCGGACATTGAACCTTGTCCCAGCTCGTTCACAGCTTAGTCTTGAGATGAGGCAAGCTTTTGCCTGTTTATGGGCAGCATAAATGGTTCTAATCTCTACTCCCCCACACATGAGCCGTAATAACCAGTCATCGCAGTTCACACCATAGTGCTTGAGATGCAAATGCAGAGACTGATTC	CTATGGGAAGAAGGAACTGCATTAGGTCACTAACGACAAAAGACCACAGAACAAATGTTATAACATTAGAGTATTACTGTTAAAATGTTCCCCAAATAAAGGATACATTTACATTTGCTATGCTAAAAGCAAGGTTATAAAAGGAAACTCAGATGCTTAATCAGGTAAGCTAGTGAAGTAAACACCTGTGGCTTTAGTATTGGTAAAACATTTCTGGTGTATAAACTACAACAAGCACAGAACTTACCTTGTCAA
ENSMUSG00000024576	Csnk1a1	E030	0.000566562	-0.128953	recognized	239			TAGATGGTGTACACAGAAATTCATGCATTTACTCTAGTTAGAATCATATTCTAGTGCTGCAGTAATATCTTTTTCATTGCTTGTTGGGTTTTTTAAATTTAGTGTGTTCTTGGTATCAAAGAAGAAGAATTGGGCATCCTCTTGTGACTGTAACAACTCTGATATAGCTTAGGGTTGGGTGCTGAGGCCCTGATTGATTATAGACTGCTTCCTGGGTTATTCAGAGTGAGGCTGGGGAGTGGCTTTAATCAGAGA	GTTGTGGACAACCATTTACTTGGTGTAAAGAACTTCATTTCGGTATAAACTGGCTCTGGGTAGCACTGCGGATCCTGAGCTGTAGCCACTGTCCTTGTGAATATTAACTGAGGTAGTGAAACATGGTGTCCGGTTTTCTATTGCATTTTTTTTCAAGTGGAAAAGTTAACTAAATGGTTGACACACAAATTGGTGGAGAAATTGTGCATATGCCAATTTTTATTTTATTTTTTTGTTAAAATCTTTTATTTTGAA	TATGTGTGTTGCTTAGATAAATGTAATCACTGTAAACATCTATACGATCTGGGATTTTGTTTTTATTTTGAAATGGGAGCTTTTTGTTTACAAGTTCATTAAAAACTAAAAACTGTTTCTGTAAGGAAGTGAAATTTTTTTAAACAACAAAATGCCTTGGCTGACTCACTATGAAGTGTGTGTGTGTGTGTGTGTACATATATATACATATATATGCACACATATATATACCATCCCCAGTTTTTTGTTTTGTTT
ENSMUSG00000060657	Marf1	E001	0.000568052	-0.098541	recognized	445			TAATGGGAAAGCAAGCTTATCAAGGAGCAGAAACCAGACACATATACAGTGCATGTGTTTCATAGGGAGACCTAGGATTCAACCCAGCTCTAACTGGCAGCTTCTCTTCCACTTGAGGAACAGGTTGCAGGGCTGGAAAAATCCAAGTTGTATTCATATGGCACCAACAGTGCAGTCTCCTGTTTCAGCCCTCAGCATCCCTTAAATGCTTTAAATGAAGTAAGCTTACCTCACTCACTGGCCTACAATTTTCTA	TACAGATGATTGCTCATAAAGTTTATTGACAACTGTTTGGTCCCAACACACAAACAGCACTTGAACCTCCCCGCCCCCTCCACCCCCCAAAAATGTTCAAACAAAGTAGACAGTTAAGAAAAACTTGTCCCCCAAGCCTCATCAAAAGCAAACAGTATAAGATGGGAAGATGGAAAGGGGATTCTGGTGATAACTTTTGTCTTTTCAACAGATAAATTTAATCTGGTACATCCTTCCACGCAGAAAAAGTGTCTC	CTAGAAAGACAGAAACATAAATAGATTTAGTTCTAGGGCTCATAAGAAGTACTGGTTTTCAGTTCATCTGTATTTAAAAAACAAAAACAAGCTTACAAAACCACACGAGAGCCAGGGGTGGTGGCTTGTAAGCCCAGCTCTCAGGAAGCCCAGACAGGATCACTACAGTGCCAGGCCGGCCTGGGCTACAACGTCAAGACAACACCTCAACACAAACAAAAACAAAAACAAAAATAAAACAGCACCTAGGGGGCG
ENSMUSG00000068748	Ptprz1	E030	0.000598449	-0.281556	recognized	235	recognized	315	ACATAGTGAGTTCAAGACCAGCCTCAGATCTATAAAAAAAAAAAAAAGAAGAAGAAGAAGAAGAAGAAGAAGAAGAAGAAGAAGAAGAAGAAGAAGAAGAAGAAGAAGAAGAAGAAGAAGAAGAAGAAAGGAAGGAAGGAAGGAAAGATGTTGCTTTTTTAAAGGCTATAGATGCTGAACACAGATGAAGTTTATCTGCACTGTCTTCCAACTCCAGGGAACAAAGGAATAAGAACTGAGTATTTATCACTGTCA	AGCAGTATCAGTTTCTGTACAAAGTAGTCCTCAGCCTCGTCAGCACAAGGCAGGAAGAGAACCCATCCACCTCTCTGGACAGTAATGGTGCAGCTTTGCCTGATGGAAATATAGCTGAAAGCCTGGAATCTTTAGTCTAACGAAGAAAGGGTGTAGGACATCCCTCATCCATGCATTGTCTCTTTCTAAAATTAGAAAAAAAAAAATGAATCCAGTTCTGTTATTTGTTTACTTCTTGTGACCTGACAGTAACTC	CTTGTGTTCACTTGTGGAATGTTGTAGTGACCTGGGTGTAGTAGTGTAAAGATATCTTCTATTGAGCTGTTGTAATTGTTTTCTCAGCGGTTTACTGCTGAATAAGCTCATCCTTTCTAGTTCTTTCTGAACTCTGGCTGGCTGGTTCAACTCAGCAGTTCTGGCTCAAAACTCCTCTCCAAATTGACTGATTCAACCTGGCTTCTCTCAGCTCTGCTTGGCTCTGCTTGACCTCAAACTAACTCTGGCAACTTG
ENSMUSG00000037236	Matr3	E002	0.000612963	0.0814632					TAAGCTTCATTTACTTGTGATTTTACTTGGTTCTTTCCGAGAGTGGTAATAGGTCTCATTTTCTAAAGCAGAATACGACTGGTTCATCTTTGACTTGCTGACCTTGATTTTTTTTTTTTAATTTTGATTTTTTTTTTTTAGTCTTCTAGAACTTCAGCATCGTATGATAGTATATTTTTATTCTTCTAAAAGAAGAAGCCCATCAATGTTTTCACTGCAATTTTGATGCACCCAAACATCTCACCCTTGGATTTA	GTTGTCTGCTGGTTCTCAGCTTGAAGAAGATTCTACAGTCCTTATTGATCCTTTTTCTTGGCGTTACCATTTTTGAAGCAAAGTTAACCTAGCTTTCTAGCTTGAGCTTTCTTTTTGGCCATCTTTTAAAACTTTTTTTTTTTTTTTTGATCTATAAAATAGACAAGAGATAGTTCTACAATGTCCAAGTCATTCCAGCAGTCATCTCTCGGTAGGGATTCACAGGGTCATGGGCGTGACCTGTCTGCAGCAGGA	GTGAGTTAAAGCAACAGATGCTTCTAATTTCTTTTACATTGTAGTGCCTATTCTGTATTTATCTATATCTTTTACTCTAATTCTGTAGTCTGATGACATTGAGTTGATCAAAAATTGTTATACTTTTGAGAACACTATTTGGAAGGTAATTGTTTTTGAACAATATAAACCAGGGCTTTACATTAATAATACAATCTACCTACAATGCTTCTTGCCACAAAGCTGTCATCCACTGGAATTATCTTGATGGTTTTT
ENSMUSG00000034636	Zyg11b	E001	0.000626719	-0.0350088			recognized	102	CTCGAACTTAGAGGTTTGCCTGCCTCTGCCTCTGAAGTGCTGGGATTAAAGGTGTGTACCATCATCCAGCAGGAATTCTTTTTGGACTAACTGGACTTGTGTGGTCTTTGATCCCTGTAATAAGCACTGTGGACTATTGTGGAACATTGTTGAATACTATTATTTATTTCTCTCCATTAAAATTAAATTCCCTAAAAGGTCTTAGAGCATGTCTGATAATCCTTCTACCATTGGGTGATGAATGTAGACTTTTTT	TTACATAAAATTTGTAACATTTATTTAGGCAAAAAAAAATCTCAATCTGTACATACAACATTAATACTTAAGTGATGTTCCATCTGAATATACAGCATGATTTACGTGCAGAATACTCCTGTTTACCAGGCCATAACTGGAATACCTTCAGCCCAGACAATCCAGAATTGTATCTGAAATGCACACACATTCAACTTTCTGATGGGTTTTGCATTTCTTGGAAAGAGTTAAATCCCATGAGAATTCAAGCAAAAG	CTAAAAGAAAAGAAAAATGTCTTAATGTTATTCCACAAACAAAACAAGTCTTCAGAGCTTAAAACAAAACTGCAAAAACACATCAAAGGCCATGCATGGTAGTGCATGAAGCAAATCCACACAGTAAGACCCTGCCTCCACAAAACAAAACAAACAACCCTTGAACCAGGTGTCTCTCATCATCTCCACTTTATTCCCTTGAATTCAGGAATCTTTTTAAAAAGGTGTTTTATATATGTATGTCTGTGTACCCCT
ENSMUSG00000002107	Celf2	E001	0.000638979	-0.098277					CTGTAGAAAAAGTCAAAATCCTCTCAAAGGGCCAAGCAGCAGGCCTTCCTGGAAAGCCTGCAAACTCAGGCCTGCTCCCTCTCGCAAGGAGTGACTTTGAAATCTTACCATCTCACCCAGAATGATCAAACGCTTGCTCTGCTGTTCCTCATTCTGTCGTCCAGAATAGAACTGCTCATGTCCTCCACAGAAAATGGCTTTAGTGTCACCTCATCTGACCCACACGCTGCCATTAGTGGCCTGCATCCCTCTATT	CAAAGTCCATTTATTGAATATTAATTCATAAAGACAATGCTATAATTTTAATGAAAAATATCCTATATCATTGAAGACTTAAATGAACAATACCCCTTAAAGACACTGCTTTGAGAAAGAATCACATTCACTTTGCACACAAATCCTTTCTTAAGCTTTATTTAAGAAATCGAGTACTATATAGTTCAATATATATAAGACACATCCAGTATTGTGTTCCTGATAGCAAGTGCATAGATTTTGTTAAGATACCAT	TATTAGGAAAATGGTTTAATATTGGAGACAGAAGCAAAAAACCGCATCACACAATAACATACATTACAAAAATAAGTCTGACTGTTTCAACTACACGGTTATGTTCACAATGAGGACAGAAGGGTCAGAAAAAACTTCGATCTAAACAGCAAAAAAGCAAACTCCTAAAGTTTAACTAATACATTTATCCACTTAAAGTGACTGAGTACTTCTAAATCTAATTATCTTATTGTGTAACTGCACAGTACAGAATAA
ENSMUSG00000074968	Ano3	E001	0.000658931	-0.0457428	recognized	485			GTGTACATGTGCATGCATGTGTGTATGTGTAGACTAGAAGTCAATGTCAAGTATTTTCTATTGATTTCTACCTTATCCTTTAAGACAGAGATTCTCATTAAGTCTGGAGCTCACAAATTGGCCACACTAGCGCCTGGGGCCTGGGATCCTACAGTCTCTGCCTCCTTAGAGTTGGTGGTCACAGACATATTCTGCCATGTTAGGCCTTTTTTTTTTTTTTAATTTGGTCAGTGTTACTACTTTGTCCAGACTTAG	TATAGTAAAAAGGATAATTTATTGAGTGAAAAAAAGATTCTATTCATTCCATTGTATAGTAGATTGTGCCAAGAATCATTTAGCATTCAAGTTGAATCTCATCATGCAGCCAGGCAGCAGTGGCTCACCTAGAAGTGCATACACAGACTCAGAGGACTGAGAACTACTACAGAGAAGACTCAGAACGGCTTACACAACTTGTCAAGGCAGACCGCATGCATGTATCCATTAGTTGTTAGCATAAAAAGACAACAA	CTGTAAAGGTAAAAATAAAAGTATGTTTTCAAAGGTTCCAGAGCACTCACTGTAAAATAGAAAAGTCATGAACAATGATGCATTTGTCTCAAAATCAAGCTTCGGAATGTTGTGTGTAGCATATAGAATATTGCTCCCGAGACTTCTATTGGAAACACAAATGCCATTCATTGACAGTCACCTTAATTAGTTAGACACCAAAAAGTTTGTTTCCTCTTTTTAATGCTGTATAATGACACCACTGCATAAAACATC
ENSMUSG00000026587	Astn1	E025	0.000673241	-0.0483332			recognized	455	TACCTCAGCACAGACAAAATTGGTTATATCAGATATCCCCTTTCCTTTCACTATATTGACTTTTTTTATCAATTCAAATACAGCCTTGAAAAGAGAATACTAAGGCAAGCATATTACATGTCATTTAATGATGATAAATTACTTGCTTTATAGAACAGTGGTTTGATTTATTTCAAAACCACAGATTCCATGATTTCAAAAGTTATATATTCCCACTCAAACACTAGTTACTCATGGTCTCATTTTTACCTTTTC	AAAGCAGGCCTCATCCTTTCCCAGCTTGGAGATCTGAGCAGCTGGTGCAATGGACTCCTTCAGGAGCCCAAGATAAGCTTGAGGCGTGGTTCACTCAAGTACCTGGGCTGCCGCTACAGTGAGATCAAACCCTATGGACTGGACTGGTCAGAGCTCAGTCGGGACCTCAGGAAGACATGTGAAGAACAGACCCTGAGTGTCCCCTACAATGACTACGGGGACAGCAAAGACATCTAGCATCATGGGACCAGGAAA	GAGTGTGTGGATATTACCTTGTGTCTCCCCATAAAGTGAGTAATCACAGTGACCCAAGGGTGAATTAAGGTTTTAAATGTTACAATTTAGATTCCAAACACTTGGGCTTTGAAGCCATTATCTTAACTAGAAACAAAGAATTGGCTTCCATGGCCAATTATAAACCTACTTTTATGTGGGAGTGATTTTCATCTTCTGTGCTTTCCTCTAAGTAAGCAGTAAGTGGAATGTCTTTGTGGCGTATCCACTGTATTC
ENSMUSG00000027797	Dclk1	E008	0.000779273	-0.100095					GATGTGGGCGTGCGTAACTCAGAATTCTTCCAGTCACCCAAGCATAAAACGGAAAGGGCAGTGTGTGCTGGGTTTACACTGTGTGCAGCTGCACGCTGGAGTTACTGTCACGAGTATCCTGAGTGCCAGCTGCTGCATCTGACAAATTATGTTTGTGAGGTAAGCACATTCTTCTCCCCAGAATGGGAAGAAAATGTCCATGGAAGAGTTGCCTAGACTGAATAGCAGAGGTGGTCTTGGCAGGCAACAGGGGCC	ACCTGTACCGCCCCCTCTCGTCGGATGATTTGGACTCAGTAGGAGACTCAGTGTAAAAGACACAATGGAGCGATGTGTATGGTTTGTGATGGGATCAAGGTTTCCCATTTCCTAAGCAAGCATCTAACAGCAAAATACACAAAAGAGTTTTGCATAAGTAATTAAGTTATACAAAAGCAAGGGTGCCGACATTTTCTACTCGCGGTATTCTTTGAAAGAAAAAAAATTTTTTTTAAAGTATCTCCTCCATTTGAT	CTTCGTTGTTCAGTGAGTTTCTTTGGTTAGAGGCTGGAATTGAAATAACCCGTGGGACAAGGGTCGCCTTTATCACTTTGGACACCACCCTCTTGTGCTCAATGTATCAGTAGGTAATACTAGACAGGCTACAGAAAAGCAGACATTGCCTATGAAATACTGACAGGAGACACACAGCAAGATTATCAGATGGGAAGCTCTGTTTCAGATGGCTCCAATTGCATTGGAATATACCTCCCTCTCAGGGTTGCCTTA
ENSMUSG00000057421	Las1l	E015	0.000798079	-0.677473			recognized	424	ACTTCTGGAGTTCGCACATAAGAAACACAGAACCCTAGGGTTTCAGTGAACACCCAGGACCCTACCTTCATACTCTATCTGCAAAGCTGCCAACTGCTCAAACGTAGGAATGAGGAAACCATCATCTAGAAAAGCATCCAGCACAGCATCCCTAAGGCAAATAAACAGTTAGTTTAGAGAGGCATGGTTGCACATGCCTATAGTCTAGTCCCAGCTACTCAGGACACTCAGAGACTGAGGCGAGAGCATTATTAA	CCTGCAACACTTCAAGAACAGCTAATAGCTCTGGTTCAAATGGCCAAAGTGCCAGTGGTAGAGAGTAATCAGAAGACAAAGCTATTAGGCTTCAGGTTCCTGGGACAGGGACTGAGTCAGAGTCTGGAGTCAGTAGGCTTTAAACACTCATGTATGAAGCATGTGGTGATCTAAGTCCCAGAAATGAGAGCAGAGGTGACTAAACAGCTCAAATCACAGCATAAAAGTCCTAGACTGACAGAAGAAATGAAACGC	GGCACTGTGAGTCAAAATAAGGCCTTGTGCGTACTAGGCCACTGCTCTACCACTGACCATTCCACCCCCAAGCCTTCTTCCACAGCTTATTGGCAGCAAGTTCTCCAAAGACCTTTCAAACTGAACTTAGGCAGAATACACAAAAGCAGCAAGTCTTGCCTACTCTGCTTGAACTGAACACTGTGGGCAGGGCAACACACAGCCATAATGAGAGGAGGGAACCTAGCCTAGCTTCCAGCAGCCATGCCCCAAGAA
ENSMUSG00000056211	R3hdm1	E027	0.000807641	-0.0697223			recognized	481	GGTATGGGGTTTTGCCTTTATACTTCAATTCTGCTAAAAGCCTTGGGTCATAAGGGTGCTGTTATCTTTAGGTCACTTTGGAAAGTAGAAAAGTTTTGCCCAAGATGACCTGGTCTAGCGAAAGCCCTTGCTTTGTCCCCACAGAAAGACTGAGATTAGGGCTGGAGAGAAGGCTCAGCGGCTACGAACACTGACTGCTCTTCCGAAGGTCCTAAGTTCAGTTTCCAGCAACCACATGGTGGCTCACAACCATCT	TGTCGGCAAGGTCTTGGAAATCACAGAACTACCAGACGGAATAACTCGAGTGGAAGCCGAGAAGCTTTTTGGGGAACTCTTTAAAATTGGCGCCAAGATCCGATGGCTCCGGGACCCCCAGTCTCAGCCTCAGCTGCGTCGTCACGCTCTCTGCTGTGGTAGTGGGGATAACACTGTCAACCCTGAGCACTCTAAACCCAGTGACCTGGCCTCTACGTACACTGTCCTAGCTACGTTCCCCTCCATTTCAGCTGC	AGACCCACTTTGTCTTTTTTCTAATTAGAAACATCCTTAGGGACTGCGAAGGTGTCACATTGGGTGAAAGCACTGGTTGTACATCAATCCCTAAAGCCCACTAAAAGTAGAAGAGATCCTACCACATGGACTTCTCCTGTGAGAAAGCAGTGTGCTTTCCCATGATGCCAAAAGTAGTAACATGAAATAATTAGCATCATAGCTGACAACAGAATAGAATCTGACCTCTTCTTCAGGCTAAGGAAGGGTTCGTTT
ENSMUSG00000032740	Ccdc88a	E046	0.00081128	-0.115674	recognized	487			GACCCACTGCATGACATGTGGGCCTGGGGTGAGTTTGCTGCTTGAACCCTAAGTGAGACGAGTCTCATCTGTACAGACTAACAGAATTAAGTATAACGAGTGCACATGGCACTAACAGTTACATTTCGCTTGCTGGACTCACTGACTTTCCTTCCTGCTTAATTAGTAAAGAGTAGTTGACTACCATAGGTTTTTGCCTGTCTAATTGGGTAGCAAGCCTTTAAAAAGTATTTTCTCTCAATTGAAATGTAATTT	GAGAAAAGTGTCCTTCAGTTTCTCAGTGTGAAGACTTTATTTCTGAAGTAACAAGACACCTAGCAACTATAGGAACTATTAAAAACAGTAAGGAGATTTTAACACATCCCTTCGTGATTAGAGCAGGGAAGAGATATAAACTTCATTCTTCCTTGAATCAAGGAGCACTACTGGATTCAGCTGCCAAAAGTTTTAGAAGGTTTTAGGACACTGTACAGTGCACTAAGCTCTACTGAATAAAGGACATTCTCTCAC	CAAATTGTTACAGTCATTTTAAAATTGTATGTTGGCCAAGTGTTACTTTTTCCCTGGAGAACTGTTTTGGGGCTTCATAGACTTTATCCTAATCATTTTGGTCATTAAGATGTTTGGGTAGAGAGTCAGTTCTGTCAATCCTAAAATAAGTTTAAGTATGTTTACTAAGAGAAAGCTTAAATTATAAAGTAGATACAGTGATAATAACAATGGTAGCTAATAATAAAATAGAACTATAACAATAGTTTGTTGTTT
ENSMUSG00000025658	Cnksr2	E003	0.000818488	-0.155986					GTAAGAACTATATGACAGTGGTTGTCTGTTCAGGATACGATAGATTTAAAAAAATTTTTTTTTCTAGTGATGAAGAGTTCAAATGACAGAACACTGGCCTCCCTAGCACTGCTTTCCTAAGCTCTAAGAAAGGAGGGTTCTTTGAGAGGCAAACACAGAAATGATTGACAGAATTCAGATTTACCCACAGAATTTAGAAAATGTAACCAATAAAAGTGGAAGTCTAAGGCAGAAATTTATAATAGGGACAGTTTC	AAGGCAGATCAATGTGATTTTTATTCACAACACAAATTTCATTTGTGAGAAATAAGCATAGATTTTTTTCATTAGAAAGATATTTGCTATCAAGCATACTTAGCAAATTATTTAGCTTTCTAAAAAGATCTGGTACCAACTGGTAATATTTTTATTTTTAAGCAATTTATATTTTTACAGGTATTCATATTATGCAATACCACACACTGCAGCAACAGGAAGAAAAACATTTCATAATACAATATTAAATTACTT	CTAATATAATAAAGCAGTGATACAATATGATGAAAGACCTGCGAGTGCCATTATTCCAAAGCACATCAGTATTTGTATTAGAAATACCATCATGCAGTACCCATGAAGAGAAACTAGAAAAAAATATGTCTAGAATTGCATATGGTTTTAATACTATAATGTCTTTCTGTTGGCATGCAAGTCTACTTGGTCATAAATGGGACCAATTTTGATTTAGTTTGTTTGGAATGCCAAGCTTCCAATCATATACAATAA
ENSMUSG00000093226+ENSMUSG00000033981	Gm25749,Gria2	E001	0.000831331	-0.0535079					TAATTCAATATTTCCCAAACCATCTAGTGCTCCCTCAACTTTTGTTCAGGGTCTCAGAGCAGTTTGTGTATACTTACCCATCCTCCGTGCCGGCGAGGTAAATTAAACCAGTTTTAAGTGTCAGAGCACCTTGTACATCTTTCCATAGTTAATGCATATTTGCAACTTTCAGGCAACTTCTTTAATATGCTTCTTTTGAATCTATTCATAAAGATTTGTCAAGCTTACCTAATCAAGTGTCCAAAGTTAATACTA	ATCGAATAGTTTCTATTATGTAGATGGACCTCCAGATTGCCATTAGGTAAAGTATGAAAAATTGGTATGTCATAGTTTAATGAACTGCAAAGAGGTTCTTTTTAAAAAGTTTTAATGATGTTATTGGTGCTGGAGGATTGCTCAGTGGTTAAGAAAGAACACTTGCAGTGGACCCAGGCTAGTTTCTCCAAAAACCATTTTAGGAGCTGGCAAGCATCTATAACCCCACTCTAGCTCTGATATACCTGGGCCCAC	CTTAAATGAGAGAGGAAGGAAAGAAAGAAAGAAAAAAGTCACACGTTATGGTTTTCAAATGCATCCAGAGTAAAGGTGGTGCTGCTTTTTGAAAAGTTTACTTGTATCTGAAAGCTTCTAGCAAATGAAAGTAGACAACGCAAGCTGAACTACAAATAATAACGCACAATTATGGCGGGAATCTGTCCACATTCACCCCAGAGACTGTGCCATTAAAGAGGAGAATAGACAGGTGAACTGCAGGTTAGTCACTGG
ENSMUSG00000026824	Kcnj3	E007	0.000833516	-0.0505329					GCAAAGAAAGACACAATTCTGTGGAGTGTTTAGATGGACTAGATGACATTAGCACAAAACTTCCATCGAAGCTGCAGAAAATTACGGGGAGAGAAGACTTTCCCAAAAAACTTCTGAGAATGAGTTCTACAACCTCAGAAAAAGCCTATAGTTTGGGTGATTTGCCCATGAAACTCCAACGAATAAGTTCAGTTCCTGGCAACTCGGAAGAAAAACTGGTTTCTAAAACCACCAAGATGTTATCTGATCCCATGA	CATTGAAGTGTTATTATTGTGCTGAACATAAGTTATGAAGGGAGGACATCATAAGGAAGCTACTAGTCGGCATGTATTATCACATCAAGCATGCAATAATGTGCAAATTTTGCATTTAGTTTTATGGCATGATTTATATATGGCATATTTATATTGAATATTCTGGAAAAATATATAAATATATATTTGAAGTGGAGATATTCTCCCCATAATTTCTAATATATGTATTAAGCCAAACATGAGTGAATAGCTTTC	CTTTTCTTGATTTTCTGTTTTTGTTCACAGACCATTTTGGGAAAACTCATTCCACTATCACCTTTTTTTGAGCCTCAAAAACTTCTTAGAAGAGAAGTTTAATCAGCACGTGACATGTCTCTCAGGTTCCAAAGTTATAGTTTTTTAAAAGCATAACATATAACATAAACCACACTATTTCCATTTTAAGAAGTTGTAAGAGATACAATTAAAAGAACTGAAAGTCAGTGTATGCCAATCTGCAGATATTGACAA
ENSMUSG00000029638+ENSMUSG00000089862	Glcci1,Gm16039	E043	0.000835091	0.0973355					GTTGCCTGTCTAAGTAGAAAATGTCTTGCTGTGTTTTGTCCTATGGAAAATACTGTACTTCAGGATTATGTTTACAATTGATCCAGGTGTTTGTTTCTAACTTCTATAATACATACAATGCAAAAAAAAAAAAAAAATGGCCACAACAGTTGCACAGTGCCCACCCTATGGCCTAGCTTCAGGTACTTCAGTTGAAGTCTAAACTCAGGTAACTTGGAATGTATGTCATATTGGGATATTAAATATTTCACAGCT	AAAAAAAAGAAAAAGAAAAAAGAAAAAACAAGTTGTGTTGCTCAGTGACTGACTGTTACAGTGTTGCAAATAAAGCCTCAGTAGTAGCCTACATAAACATTCCCCATTGCGTGTGACGAAATTTAAATGCAGGGATGGCTGGAGTTCATTTCAAAGCAAGTGGCGTTTTGCAGAAATAAATAAGGATTTTTCTTTATATTGGCCATTGGGGTCATAATTGCTACTATTTTTATCTAAAGACATATTTATGTTTAG	GTTTTGTATTTTTTTCAGTATAGAAGTTCCTGTGTCTTATTTAAATAAAGTTATTAGTAAAACTGGAATAGTTTACATGTGTTTTTAAAAGACTGGTTGTTGGCATGTTACCCATCGAAGGTGAATTCTGCCTTAGGTAAGGGCAGTATTGGTGCTCACTGAGTTCCTACCCTGAAGAACTAGAGCTGTGGGGAGTCTTAATTGGATCAGATTTCTCCACTTTGGTTTCCTCTTGACACTTAATTTGCACACTTT
ENSMUSG00000034083	Ccdc174	E009	0.000836006	0.761024			recognized	482	CACAAATGACCAGGACCTTAGTCTAAAAGCACCATGGCAAAGAGGGGATTACCTTGAATCTGGTGATCCTTTTTGAAATTAAAAAAAAAAAAAAAAAAAAAAAGTTACGTTTAGATACATCTTTCTTCTGGCATGTAACTTAAGTTGTATTTAGCAGCTAAACTGTTGGAGCCTCAACTCAGTGCATCCATCTATTCACTGTCAGAAACTTACTGAGCAGTTACTCTGTACCAAGAATGGCTTCAGGTTCGTAGG	TAAATAAAAGTTTCTATTTCTTTATTGTCTCGAATTCATACAGATCTTCAGTATTAATTGTTTGAATGATTCTAAGAGGGAGAAATTTAAAAAATCAAGTCTGCACTAATAATTTGATGTTCTGTTGGGTACCAGGCAGTTTGTTAGGAGCCATCAGGGACTGGGCAGTATAGGGAGCCAGTTCTGAAGCCTTCACAGCAGATCCAGTGGAGCAGGAGAGCACAGCACCAAGGAGGCGGTTGAACTGGAGCAGCC	ATGAGGAAGTGGAGGACATGTACCTTGTGGATTTCACACAGAAGATCATAGACAAGCGAAAAGAAATGGAGGTGCTTGGTGCCACGAGAGAGTCCCAAATCGAGGAAGAGAGAGATGATGATGATAAAGAAGAGTTTTCTGACAAAGACATACCTCCTCCTCAAGACCCCAGTGAGGAATGGTGGGTAATGGGGATCAGATCGAAGTGATCCTCTCAGACTCACATTGGCTTTTTGAGAAATGTTTTGTTTGATC
ENSMUSG00000026464+ENSMUSG00000094410	Zbed6	E018	0.000861913	0.090021					GAGTAACTACAGAGTGGGGCAGCGAGCTGAAGAAGGCAGAGCAGCATTACAGCCATTCTGAACCAGCTCGGGTGGGCAGGCGGGCGGGGGAAGCACAGATATGCTCACGGGAAGCACAGAGATGCTCAGGATGCTTACTCTTCTTCCTTTAGATCAACAGAGCATCACTGGCATGGCATTCAATGCTGGCCCTGCAAAGGCTTCCTGATAACTGATGATTAGAGCTAAAGACTTCACTCCAGTTGGTAAAAGGGT	CTTAATACTAGTCAATTTTCCAGGAATTTTTTGGGCAGGGAATATCCCCAAATCTAAAATGAAAAAAAAGGAAAAATTGGGATCTTACATTAGTTATTCAATCTGAAACATCTAATAGACTTACTAAAAGTCAGCTCTCTGTGGCCTCCCACTCAGTCACAGAAACAGACTCTCCGAGTGGGAAGGCACCTGCAGGGCCACTGAGACAGTTCACTCATTTCAGCAATGATGCCTAACACAGTAAAGTTTCAACTG	CAGAGAACAGAAACTTTACCGAACCGATGACAATGTCTCCGACTCCCGCGTGCTGCCACGTCTTTCTCTTTTCTTAGCTGCGGTCGCCCGCCGTCCTCACAGCAGCCGAACAAGCAGAAACCCAGGACTGCCAGCGTCAAAGATGGCGCCCGGCTACAGGCTCGCCTTTAAGGCTGGGCCAGTGAAAGTGCCAGCACGACGCAAAGCGCAGGCATTCTGGGAGTTGTAGTTTCCTCTATGAGGCCAGCCTTAAAA
ENSMUSG00000071172	Srsf3	E005	0.00087241	0.299238					TATATAAAGAGTTTAGCAAATTTAACAACTTAGAGCAAGTGGGCCTGGGCAACTCTTGCTGTTTTTTTTGGTTGGTTGGTTGGTTTTTTTTTTTTTTTTTTTTTTTTTTTTTGAGACAGGGTTTCTCTGTGTAGCCCTGGCTGTCCTGGAACTCACTCTGTAGACCAGGCTGGCCTCAAACTCAGAAATCTGTCTGCCTCTGCCTCCCAAGTGCTGGGATTAAAGGCGAGCGCCACCATTGCCTGACTGGGCAAC	TACTTGAGAGAGCACCTTTTAGAGAAAGGCATTGGTGTAATGGAGTAGCTAGTAGGAGCAGGTATTTCTTCCTAAGGTTGTTGGTGGGTTAACTTACTGTGGACATCGGAGTTCTCTACAAAACGTTTGCTGGGTATAGTTTGGGGTATGCGAGTTGTGCTGAGTGTTGGCTTTTGTCTGTAGGTGTATTATTCATGTTGGTAGTTAGTAACTTCTATCTTGGATCTGTCTTCTAGTTCATCTTCTAGTTGCATC	AGTCACCATCATGTCTCTTCTCACCACCCTCTGAATCTGCATTAGCCAGTCAACTAGCCCTTTCAGCGTCATGTGACCAGCGCGCCCCATTCAGCTTGGCTGGTGTCGTTTCACATGACCCAGGCTGGCCAGTCGTCAGGTTGCACCGCCCTTTGGTTCCCGAGCATGCTGTTTTCTCTCAGCCTTCTCTCCAACCTTAACCAAATCGGCAGCAGCCACCTCGACCGCCCACACATTCCTGGCCAATCAGCTCAG
ENSMUSG00000057738	Sptan1	E081	0.000890389	-0.131027					GGTAATGTAAGGGGCAGTGATGGACAGAGTCCTGCCTCCCTCTGCCCTCCTTGCTCCATTGTACCTGTCTCCCACAGGGATGGCCACGTCTCCCTGCAAGAATACATGGCTTTCATGATCAGCCGCGAAACGGAGAATGTCAAGTCCAGTGAAGAGATCGAGAGTGCTTTCCGGGCCCTCAGCTCTGAGGGCAAGCCTTATGTGACCAAGGAGGAGCTCTACCAGGTAGGACTTGGGACTGGCACAGCTGATGCT	CAATCCTCTTGGCTTGTAGGCAAGCCTGACCTACACTGCTTGCCCTGTTATCTCTATCTATCTATCACCTTTGCTGCATGTCACTTCCTCTGCTTTCAAGGAGAATATTCCAGACAGTGTTACTTTCCAGTGTAACCATAAGCCTGCTTAGCTTGGGGTAAGACTTAGTAGAAAATGGTGCTTCAATAAACCGCTTCCAGTCACAATCACCAATGTTGTGGGACCCAGACCCATGTTTGAGCCAGCTGCCCTCAT	TCTAAAGGCTTTGCTCCTCTTTATCTAGCTTGTTTAGCACACAGCCATCCTGAAGCATGCTACCACCACCACCACCACCATGCTCCTTGGGGCTCTCAGGTAGAGTTTTTTTTTAAAAGATTTATTTATTATATGTAAGTACACTGTAGCTGTCTTCAAACACACCAGAAGAGGGCATCAGATCTCATTACGGTTGGTTGTGAGCCACCATGTGGTTGCTGGGATTTGAACTCAGGACCTTCAGAAGAGTAGTCA
ENSMUSG00000030313	Dennd5b	E001	0.000968085	-0.0599939					CTGCCTCTGCCTCCTAAGTGCTGGGACTAAAGGTGTGCGCCACCACCGCCCGGCTTGTTTGGTTTTTTGTATTTGTTAGATTTATGTATTTATTTTATGTATGTGAGTACGCTGTCACTGTCTTTAGACACTCCAGAAGAAGGTATCAAATCCCATTACACATGGTTGTGAGCCACCATGTGGTTGCTGGGAATTGAATTCAGGACCTCTGGATGAGCAGTCAGTGCTCTTAACCTCTGAGCCATCTCTCCAGGC	ATCAACCCCACAGTTTTATTGTAAAGAACAAAGCATGAAAAGTCATATTTAAATGTACTCCAAAACCTGAAAACCCATGTCAGTTTGTCTGATATGTTAAAGTGCTTGTCACAATACTTTTCAGATTTTATATTATGTTCAGATGGGGGAGGGGAGAAAACTCCAGTTCTGACATACATTGTTAATAATACAAAGGAAAACAGTGTATAATTTAAATGCAGAAATAGTAATTAAAAACAAAACCAACAACAACAA	CTACAGACCAAACAGACACAGGACTTGAGCTCTAACAGATACAGTGTAACTGGCTCCCCCTTGTGTCTTTCCCTTTAATTATCAGCCTGTTGAAACAATACAATTCAATCCTGTTCCTCAAAACCCTAGGATGATTGGGTGTATATATTTCTCTCTCTCTTCCCAATATGGGCACATGGAATAAATCTCTCTTCTGCTTCTCACTATGCATTTTATTTTTCTTAAAGATTTATTTTATTTATATGAGTACACTGT
ENSMUSG00000040565	Btaf1	E012	0.000968085	1.27245			recognized	138	GTAGGTGTTGGGGATTTGAATTCAGGTCTTCATGTTTGGGTAGCAGTTGCTTTTAGTGAGAGTCTTAGTATATGATCACAGGAGTAGCCCAGAGAAGCTAGCCTTAATGGGGGAAAATGAAGAGATTACATTGCAATAAGGAGAAGCTGAAGAATGTGGCTTTTCTTCTCATCTCTCTCATATCTCCTTGCCAGTGATATTGAAGAAAATAAATGCAAGCTAAGGGTCTTGACAGGGACATACATATGTATTTGT	ATGTAATTAATACTTTATTGCCTAAAGTCTTAACTCGAATAATCGAAGGACTCCAGGACCTTGATGACGATGTTAGAGCTGTTGCTGCAGCATCCCTGGTTCCTGTAGTAGAAAGCCTTGTCTACCTTCAGACACAAAAG	GTACACTAAAGTCTTCCAGCATTTTCTTCCTATAGAGCATGTTTACATTTGCAGATGGAATAGAAGGAAAGACATAGCATTCTTTTTATTTTATTTACACCTGTTGTAGAAATGTTCTTGTCTCTAACATCCTTCTGATGCATGCAAGCTTGATTATATATGTCTTTGGGAACAGTGAATTGTGTATTGTCTAATAATCCCCTTTCTGTACTTAGTACACAGAATTTCCTTGAAAAGGAAACAGCTATTTCTCTC
ENSMUSG00000052572	Dlg2	E003	0.00104943	0.374735					TTTGTTAGAGAGCCTAACAACTTTAAATATCCCTGGAAGACAGACCTGATGATATGATATCCCAGGACAGGGCAGTAAGAGGTGGTACTTCCTTGCCCTGGAGCTGGCGAGCACCCCTGGTGGACCCAGCTTAGGTTTTAGGGGACTCTATGAGACACGGAACCTTTTGGTCCTGCTCTGTTCCACACAGAGAAATGGAAGAGTGAGGCATGCTTGCAGTGGTTTGTAGTATTTGCCAAACAGGATACTGCATCA	AAAGCAACTGAGGTTCTAACTTTCGGATGCTGAATCCTCGGCTAATTGAAATTACTGGGCACAATGCTATATATAGCCAATGAAGAGATTCTGAGCTCTCACTCAGTGCCTTCAAGACATGTCGTTTTGTAGTCAGAGGAAACAGGGATCAATGCATTTTCAAACTGACAGAGGGAACGGATGCTCCTTAGCAGCACATGCCCAGGATCGTGTGTGTGGGGCTTGCGCTGTGCTGAGAAGCTGATCACCACCGGC	GTAAGAGGGAGCGAGACGGCCACTGGGCATGATGTACATGTTAAACCAGCTGCAAAAAAATGTCTACCTTGTGTAGCGCCAGGACTTTTCGGATGGCCGGCTGAGCAGGCTGATTATTACAGGTGGTTGCGAAGGCTTTGTTTTATTGTTGCCTTGCCGCCTCCCTGGGGGAGCGAGTCAGAACGCTGTGGTGAAGTGACCTTCAGGTTTAACTGTTTGTAATTCAGGTTCTTGCTCACACTTGGAGGGTGGAGA
ENSMUSG00000030096	Slc6a6	E015	0.00108671	-0.048646					GTCACCACACTGAGAAGCCGAGGCTCTATGGCTAGAGTGAGAATTCTCCTGTAGTCTCCTATCTGAAAGGGCAGGCTCTTCCCCGCAGTGGGCTCCTAGGCCCATCCCTTCAGGAGATGGAGCTTCTTGAGGAACTGTCTCCTGAAGGGAGACCAAGGAGTACAAATTTCTTCTTGGGGGCGGGGTCTGGAAAAGAGGAAGGATTAGGTCAGTTTTCCAACTCTAAGACATACTGTAGAAGCAGAAAGTCAGAGA	GAATCAAATACCTGATAACCCCCAGGGAGCCCAACCGCTGGGCTGTGGAGCGTGAAGGGGCCACACCCTTTCACTCCCGAGTAACCCTCATGAACGGCGCACTCATGAAACCCAGTCACGTCATTGTGGAGACCATGATGTGAGGTCCGGGCCATGTGACAGGCGCCGCTTTCCTGCTGTTTACTAACGTTAGATTCTCATAGGACCAGGTTTACAGAGCTTTATATTTGTACTAGGATTTTTTTTTTTAATTGT	GAACGTCTGGTGTGTTTCGGAGTGGCCTGTTCACCTCTACATTTTGGCAAGCCCTTTACAGTTCGTAAAGGGATTTCACTGGGGGTGGAGAGCTGGCTCAGCTGTTAAGAGCATTTGCTGACCTTGATTTTTTTCAGACACTAGCTTGGGGCTGGCTAATTAGAACAGGCTGGCCCGAGAGTCCCAGGGATTCACTGTCTCTTCTCCCCAGCTATGAGATTGCAAGCACTGTTGCACCTGGCCTTTGGTGTTGGT
ENSMUSG00000049176	Frmpd4	E002	0.00122507	-0.0784151	recognized	195			GCAGTGATTATGGACAAAGTCTATGGAGGCTCCACTTGTAAAGGACTTTCATTTTCATTACCATTTATTTCTGTAATGTTTGTTTAATGATATGGAAGAATTGCTCATTTTTATATGTGAAGTGGCATTGTGGTTATTTTTTAAAGTTCTTATTCCTAATGAGATACTCATAGATTAAGGGACAGGGTACCAGGGAGTTTCTAAATCTTACAGGTTGGGAGGAGGTGTGTAGAAATGGAGCAAGTAATACTGATT	TTTGTTTATTTATTTATTTAAAATTATGTACATGTACCACTGTACTATTATGCCATTATAAAACATACACAAACATAAAAAAACTAGATAAAAATAAACACAAGTATCATTCTAGTATGTTCTTCCTATACTCTAATGGACATGAACTCCAGTTAGGAGCCCCATGCTTAATGAAGGTGAGGGGGCCTTTTGAGATTTTTGAATAGTAAAGACTTGCTTTAGGAGAACAGAAACTTACTGGAGTAGTCACAGGAA	CTAGGGGTAGTAGAAAAACAGAGTCGTTAAGCATCCCTTGGGTGGCACTTTCACTATTGCTCTATTTGATGCCTGTCATTTCCCAGGAGACCATTTAAAAAGAGTTGCTATGTGTCAGGGGCTCCCCTTCTTCCCCAAAATTGCTTCCTCATAACTTGTCCATGTCAATGGATGACAAGAGTTCCTGGAGTCTATTACTTCGGGAACTACTGACACAGATGAATTTGTCTAAACATTTTGAAGCATTTGTATGGA
ENSMUSG00000031167	Rbm3	E002	0.00133844	0.441644					AGAGAGAGAAACTACCACTTCATGTGAATAAATCTAAACTGCATCAAGAACTTTTTCAATGAGAACCTCTTCTAAGAATACAAGTATATGCTAGGCAGTGGTGGTGCACGCCTTTAATCCCAGCACTCGGGGAGGCAGCTGGATTTCTGAGTTCCAGGACAGCCAGGGCTATACAGAGAAACCCTGTCTCGAAAAACCAAACCAAACCAAAAAACGAAACAAAAGAATACAAGTATTGTCGGGCAGTGGTGGCAC	AATTTTAAAATTATTTTAATAAAAGTAATTATTTTGGAAGAGGCATATCAAAAAAGTTTGCATTTCCTTTATAAATTTCCAAAAGCCAATAAATGGGCCCAACACAAGTAAAGGATATAATATCTGACCTTAAAAATAAAGGGAGATAGCTCAAGGATAGCATACTTACCTCATCCTTGATTTGAAGTCCTGTTTGCATCCTGAAGACAGCATCACCATAGTGATACTATAGCACACACTTAAAATATGTAGATA	GGACCTCCTGGGCCCTTTCCCTGGCAATAATTAGCACCAAGGCAAAGCTAATTATTACAATATACCTCCAGTTATCTATCTGGAAAGTAGAACAATTGTTACAGAAATATGAGGCTACTATTTTTGTTCTTTGTTGCTGCTATACACATACATATACACACACAGCTAGAAAACCATCCAACTCTTGTCATTTTGTGGTTGATGATGAACTACCACCTCAAGTGACACTGGCTTTCCTTCCTCCCCACCCCTGAC
ENSMUSG00000027346	Gpcpd1	E015	0.00147828	-0.249954	recognized	182			TAAAACAAAAACAATGCTTCCAAACTAGCACATACGTTTCCGGTCTTTGGTTTTTAATGCAGTCACATGAGAAAGCTGTAAAACAAACAACACAAAATGCAATTAGAAAAAAAAAATCTATAGTTGATGCAAGAAATTACATAAGGTAATTTGAAAAGTTAGCAAGCTAGAACAGACAATGTGAAATTACCAGTTTAATAATAAATACTAATACTTAGCTGTTTATTTAAGTATCTAGTAGGGATGAGATAAGGA	TAGTAGAAAGGGGGAGAAATAAATCTGTTTTACCATTTTTGAATGTTTGCACTGCATACACCTACCTTCTCAACTTACTGAAGATGAGAGAGCTGGTAGGTATCAACCATTACCCCATGCAGAAAGGCCCACTACCGGAGCGCCTGTTCCAGCTTTGCTTTTTTTTTTCCTTGTAGTCCCAAAAAAGCCCACAGCCTTTCACATGCTGGGCAAAGGCTCTCATCTTTGAGCTTCTGTTTTTACTGCAGACAGCCA	ATGTCCATTCATCAGTAACATCAAAAAGAAAATCCAGTGGCACTGCTGCCCGACTCCAGGAAATCACTCCATCAAACCTATCTCTGAATACTATAAAGGCTTAAGAAGACCCGGTAGTAATTCACTAAGCAAGTGAATTCACCAACTGTAACAAATAATAAAAACAAACATCTTATCACAGTAAGCATAAACTACAAGGATGTCAACATACCCTCTTCATGGTCAGACAGCAGGTGAGGTCATGATACACCACGG
ENSMUSG00000020785	Camkk1	E019	0.00150034	-0.0882945					TTAAAACAAAGGTTGAGATCGGGGATGGGTAATCAGATTCAGGGATCTGTTGAATGGTGGAATTCCAAGACTGATGGTAACTCGGCCCTGTGGGGAAGTTAAAGGAAATATACAACGGAAGCCTTCTACCCACTGGGGTCAATATGGAAGACCTTTGACCTGGGCAGTATTCCTGGGATACCAGAAAGTCTTTTGGATCAGATGGTTAGAGATTCCTGAGAGGCCACAGAAGGGTTGTGGGTTGAGGCTGGGTCC	TCCCTGCATGTGCCCAGGGCCGTCGGCAGCATGCTCATTCCGCACCTCCAGAGGCCCACCGCCCTCATGCAATAGTCGCCCCTGCAGGCAGGGGGCTGGGGACCGCAGCCCCTCTCCTGGCCCCCCTCACCCATTGTGCTGCATGACCTGCGCACAGGCACATCCAGGGACAGGATTGGAATGTGTGTCATCTGGGGCTTGGGGGTCCCAGTTGGTCCTCTCTGTTCTGAATCATCTTGCAGGGAATATTAGAAA	TAAAAAAAAAAGTCTTTGTATGTCTTCTGCATCCAGACATGTTTCTTTCTTGTCACAGTTGACTTGGCTCAATTTTCTGGAAGGCACCGGAACAGCATGGTAGGGTAGTGAGAGGTGGGGAGAGGTGGAAGGTGGGTTCATGAGGCTAAGGACTCCTGTCGCCTGTGCAGCTTTGCGGAGAACTGGGTGCTTGAGAACCACAGGACACATTTCCTTTGGGAGACAGAGGCAGGCAGATTTCTGAGTTCGAGGCCA
ENSMUSG00000032452	Clstn2	E001	0.00151029	-0.108275					CTGGGCCTCCACTGGCTTTGGATGGTGAGAGGGAGGCCAATTCTGTGAGGTCCCATGCCAAGGTAGCTCTTAGTGGCCTCTGTGTATAAAGGCAGGTCAACATGGGGGTGGGGAGCCAGATCAAAAGAGGGGCAGGCCATGTTCATAGTCACTGTTCCCAGGAAGCATTCTGATTCCTCTGGGTGGGTCTCATGGTTACCAGGAGGAGTAACCTATCTTAGGGTTCACAGCTCCAGCAACTTGTAGGCACTCAAT	TACTGTGAAATTCTAAAATCATATTTATTCAACCAATTCACAGAAGTGTCGTAATGACCACCAACATGAATCAGTTTGTAGGCATTTACAAGCCAACGCTGAAAATAAATATCTGTCTGTGTTGAATAGGCATTTAACAAATTACTCAGAAACTTCAAGAATCGAAATTGTTAGAAATTTAAAGTTTGGAATTCAGGCATGATAAGATCACAGCCATGGGAAGAAACTCAACTGATTCCCCCAGGGGTTATGTCC	CTAAAAGCAAATAAGAATAACCTAAGGCATCTATAGAATTAAGGTTGGCTGGGACTAATGGCCTCTCTGTTTTGTATCACACGTCCATAGTATAGATATGTATATATCTACATACATATATATTATCAGCTGCTCTTCACTTAGTCATGTCCGGTATTCTATACTTATTACTCCAATACCCTAAACTAATGCCCCGTCCTATCATTCCGACTCCTTCTTACAGACATTACAATGTACATGCAGTAACGTTACAAG
ENSMUSG00000034593	Myo5a	E066	0.00158095	-0.0559019					ATCACAAAAATAAACTGGCAACATTAAAGTAACTGGCCAAGTAACTTCCTTCTCTGTGTCCCTACGGCATAGCGATGTGAAAGCTGCTGTTTGCTAGGCCGTGTAGATGCCCGTTTGCACTGTAGCTTACTGAGCATCTTAAGTGGCTGCTGTGTGCTGTCTCCTGACCTAAGTGAAAGTCTTACTAGGACTATAAACTACGCTTCTCTTTCATCAGCTCTGTTTACAAGTCAACCAGATCAGTTCTAACCGGAT	GTCACTATCTGGAAAGGACTGTCAGAATATTTATGACTAAGATCTTGAAACTGTTTATCCTATAAGTTATTCAAAATAGGCATATAAATAAATCATTATAATTCAGGGGGCTTAGGTGTTGCAACCTCTATAAATGTTCTCAGATACCACTGGATACTTTAAAAATATCATATTATAAACACATTAAGAAGACGTATGTAAGAAGTATAGGAGATTATTAAACTTTATAGAGGATTTGGATCAGTGAGATCCAGG	CGTTGTCTTTGTCTATAAACCCACTTCACATTTTAAAACAACAAAACAAATTGTTACTTTGGAGATTAATTGTTATAAGTATAATCTCAGGTCTTAGAAATTGTGTTAGAGAACAGCAATATGAAAACTGCAAACACTTAAGCAAAAGCAGATCAGCCAGACAGCTGAGCGATGTGGCCACTTGCATATCCTGGGAGTCTCTGGCAGAAAAACAGAGCCTAGGAACTCAAGACTTCCAAAAGTTTAAACAAGATT
ENSMUSG00000047126	Cltc	E002	0.00158095	-0.100099					CAGTAATACTAATTTGCTAAGGGTGTGTATGTGAAGCTGATGTTAATTAGCCTGAGAGTTGTAGAGCAATAGAAGCTAGGCAATATGCTCTATAACTATAGATAATTAAGTTGTTAACAAAGTAAATTCAATATTCTCAGCCATGGCAAAAATTTAAATTATGGAGCCCTTTATGTTGAAAAGAAATACCATGATATTTTAAAAAATATACCTTTATTTCAAGTCAGTGTAACACTCATACTTTTCTTAGTTACG	TTTCCACAGTCCAGTAATTTATTTTAAATTGGAGTAATTTCAAATTCCACAAACAAAACTGAAGAACAGCAATATCTTGTTTGAATTCTCTCTTCTGTACACTCAGTGATCTAAAACACCACAATATCCAACATACACAAACCTCAGGGAAGGGAGGGTTAGTAAATACACACGCGTGGAATCATGGTGCTTCTTGTTCCTGAATGGAATGGTCCCACAGAAAAAGCACAGGATACAGCACAACATGAGGACACC	TTCAAAGAATGAGGGGGAGAAAAAAGCCCACATGAATACTATTCCCCTTTGAAAAGAAGGTCTAATGATGCGGAATGTGAAAATAAAGTTTTAACATAGGCGACCCAAGTCTATAGTTAGAACAAAAAAGTAGTCCTTCATGAAGTAAAGGTTACAAGAACACGTTGCCTGTTTCCCCGTTTATAAACTGAGAAGTGGGTAGAGGATGCTTCAGTATGAAAATAGGAGACTACAGGATCAGCTTCCATCTCACAT
ENSMUSG00000036745	Ttll7	E029	0.00158724	-0.105457					GATACAGATGTCACCCCAATTGTCTAAGTAGTAACTTGCTTGTTAGTTTGTCCTCACCCACAAACAGAATCTAAAGGAACAGTTTAGTTTTCACTCGAGTAAGCCAGCCTTGAAGGTTTGAATCTGGTAAAAGACCCTGTTGCAATATGAGTATTAAGTTGTATATGGAGCACAGGGGAAGCAACTCCGTTGTCTGTAAAATGCCAGGGTTTGCCTAGATTAGATGAAGTTTTTGTTACTTGTCTCTAAAGTTCA	AAAATACCAAAAATGATAGCTGCATACATGCCATTACTTAATCTTCTATAAAGCACTTATTCATTCTTAAATATATATTCTTTTAAAAATAGTAAGTACCTCAAAAGTGACAGAAAATTCCTTCCTTCTCTATTTAGCAATTGCTAGTTTACATTCCGAATCTCATGTACTTGGTTCTAAGCATTAAACAACAATAAAAATATAACTATACAATTATCGTTCTTGTGACCTGGTGATTTTTGGACATTTACTTTT	CCTATGGTATCTCATCATTTGGCTTGTTTTTACACATGTATTTGCACACACAATACTGATTTCAGTAGAAGAAGAGATGGGCAACCAATTAAGCAAGCTGAACTGAGCTTTCAATTTGATGAAGATATTTTCACGATAATTTTTTTTTTCTGTTTTGTATTCTAGGGGAAGGGGCACCTGCTGTTAAGAGTCAGATCAAGAAAGGAGAACTGTCAACTTCTCTCCGTTGAATGGGAAGGCAGAGTGTTCTAAAAA
ENSMUSG00000025272	Tro	E025	0.00160996	0.0945424					CCTCCCCTATAGAGGGGCTTAGGCCTAACAATGGCTACTCTGATACCCAGGCTTTTCTTTTACTGGCTTCTAACTAACAATTTGTCGTCTCCCAGCATACAAACTAAACAAGGACATAGCCTGGATTTTTTTTCCCTTTTCTTTGGCATGTTGTGCATTAGATAGATCACTTAGGTGTTGGATAGAGCACTTAATTCTGAGACTTTGTGTTTGGGACTTATAGTCCCCAGTTAGTAAGAGCTCTTTTCAAGAAGT	TTTCGGTTCCTCTTGCCCCGGGTTCTGGTCGTGGGTTCTAAACTCAACTGAGCCAGATAGTCATCTGCCAAGGCCTGGACAGCAGCAGCAACCTGAGTCTCCAGGGCACTTATGCTGGCCTCAGAGGCCTGAGCTCCTTGTTCAGCGATCTGAGCTTGGCTTTCAGTTGCCCGATTCTTATTGGCAGCCTTTCGAGCCCTAGACCCTCTCCTGATCCGTACAGTGACAGATAGGGCATGGTTTGTAACCGTTTGA	CTACATACTTAGGATTATAATCCTATGGGCCACCCCACCTCCCTACAATCACCCCTCTCTACAGTTGCCTCCCCTCCTGAACAATTTCATTGAAAGGGGTTTGGGAAAGGGGGATGGAGCAAGAGATAGATAAGTTTCCTCTTCCCTGTACCATGCAAAGGAAGACTGAGATAGGTAAGGTAAGGAATTATGGAACTACACAGTGATAATAGGCTCCAGAGTGGTAAATGAATTCAGGGCACGACAAACAGAATG
ENSMUSG00000026657	Frmd4a	E010	0.00164137	-0.59771	recognized	359			AGAGGCAGGATGTCTCTGTTGAACCTAGGCTTTGAAGGCTTGTTTATTCTAGCTATCAGTTTTTCTCCAAAGATCTTCTGTCTCTGCCTCCCGAGTGCTGGATTTACAGATGGGATACCATGTGCACACAGCATTTGCATGGATTTTGGAATCCTGTCTCCTGTGGTCCTTACATTTGCATGGCAAGCACGTTGATCAATGAGCAATCTCCTTATCCCCTCAGTCAGCTGTTTATTTACTTTTTTATAATATACT	TGTCACAAGGAACCTTCCATAGGAACCGTGTGTCCGTGCTGGTGACATTGATGTTGATTTTGCTACATTCAATTAAGAACATGTTCCTTTGAGGAGGCCAGGTGGAAATCTTAAAACTTGCTGCATCCTCCTCCTCACGTTCCACCTCTGCATCACCATCCTCATCATCTCTGGCTCTGAAGTGCATTTTTCTGAAATCTCATCTGCTCATCCAGATGAATGAAGAAGCTGGTGGCAGACCCTGCACAAACTCAA	ACCATAAGGTCTCACCCTGTGTTTTAAAGCTATGTGTTTTTGGATCAAAATGTCTTTATAATAATGGGGGAGGGAGTTTCTTTGTTTCTTTTAAAAACATTGAAGAGGGGCTGGATACAGCCCAGTAATAGAGTGTTCGCATAGCGAGTGTAAGGTGCTGGGCTTTAGTCTCTACCACTGCACGGTGATCATGGTGGTGGTGGTGGTGGTGGTGGTGGTGGTGGTGGTGGTGGTGGTGGTAGCAGTAGTATTAAA
ENSMUSG00000019124	Scrn1	E001	0.0016429	-0.0548422					GCCTTGATTTCAAATCTTTTGGTACATACCAGGTGACAGAATTCCTGGGTCACGTGGCAGTTTATGAGAAAGTCTCCATAGTTTACAATGGACAGCCACCTTTCTTTCTGCCAGCAATGCCTGATGTTTCCAGCACCCCACACTGCGGCCGCTGTTCTCACAGCTGCTGTTCTGACAGAGTGGCATATGGCTATAGTTTGGGGTGTTTTCATTGTTATTGGAGACAGGGTTTCTCATTGTAGACCAGGCTGTCCT	ATTGACTTCCATGTTTTTATTGTACACTTGGTGCATTTAAAGACACTCCGAGGGCAAGCACTGGATAGAGACATCGTTTGATTTGTAGATATCTGTACAAAAGGCTGTTAAGACCACATGTTCAGTCCTCCCCCCACAGGAAACAAAGGTTTTCTGTTATACTGCTTCAGCTATGACATTTCAGTTCGCACACGTGATTAGAGACACGTCCTTATTGATTCCTGCAAGAATTCTCTGCATGACAGTTCAGGATGG	CACATGGTAACTCTCGGTTTACTCACACAGAAGAGTGTTTATCTGCTGGTAATTTAGTCGGGTGGGAAGTTTTGAGTAAGGGTGAGGGTGCTTACATCACTTAAAGAACTTCATCTCGGTGTCCACACAGTCATAGAATAGGTCCCCCACCTCGGCGGGGTCCGGGGGCTCGGGGCTGCTCAGAATCTCGTCCATGGCCTCCAGGCCTTGCTTCTCCAACTCCAGCATGGTCTTCCTCAGGGTGCGACCTTGCTC
ENSMUSG00000040565	Btaf1	E007	0.00166965	0.956927			recognized	98	TTTCTCTTCAAGTTATAGAACAGCACTCTTCTCACATTTTCTGTATTCTTTATCAGTGGTCAGTTTCTTTGTGATTTTAAATTTTTGTTAATTTTTTATATAATATATTTTAATCTTATTCTTTCAAACAAATAAGACAATCTTTTATTACTTGGCATATTAGTTTTCTCCAGGTTGCAAGCCTAAAACAGTTAGTGTCATATTTGGCTGGATTTAAATTTGATTAAAAGAGTTTTAAATAAAGGGAACTGGTTG	AATGACAGCACTGATGGAGAGCCAGAAGAAAAGAGACGGAAAGTAGCAAATGTTGTTATTAATCAGACTGCAAGTGATTCCAAAGTCTTGATAGATAATGTTCCAGAAAGTTCTTCCTTAATTGAAGAG	GTATTTTGAAATTGTTTATAACTTTATTATTTTTAATTTTTAGCCTTATTTTTTATTTGTTTATGGATGTTTTGCTGCATGTATGTTTGTGTACCACTTGCATGACTGGTGTCCACGAAGGCCAGAAGAGGGTGTTGGACCCCTTGGAACTGAAGTCACAGACAGTGTGAGCTGTCATGGAGGTGCTGGAGACTGAACCTGGGTTCTCTGGAAAAACAGCCAGTGTTCTTAGTGACTGAGCCATCTCTCCAAGCC
ENSMUSG00000020580	Rock2	E033	0.00171224	-0.0660329	recognized	150			GCGTGCTTATTCCTTTTAGTTTCTTTATTTTGTGATAGGAAGGATGGAACCTAGGGCCTTGGGCTTGTTAGACAAGTGTTCGACCCCTAGCTGTACTCTAGCGGCTAGAGTCTAGCCCTTTCGTTCCTATCTTACAGTTAGGGAAAATGTACCTTGAGGTCCTAAAGTATGTAGAGCCAGACCATAAATCCTACTCTTCCAGCTGTATAGGGCAGCTAGAAACTCAGCATTCCAAGACCCTGCTGTACCCTGTTT	TAACTGCCTTCTATGAAAGCAGTTATTGAAGGTGATCGTATTCTTCAAGCTACAAGACTGAAATAAGATTTCTCAAAACTAAAAGGCTATATTTTACTGAGACACATACATACACCACACGTGCGCGCGCATGCTTGCCCTACCTTCCCCCCTGAAATAATTACAAATTATGAAGAGGTTTTTTCTGGGCTACTTTGAAACAAGTTGAACAAAAGTGGTCGGTGAGTAAAGGTGTCCTGCAGTTCTCCCAGACTG	AAGATGAGTCTGAAGCCAGCTTGGGTAACTAAAGGGGAAAGTTTTGGGGGTTGGTTGGTTAGTTTTTTGGTTTGGTTGATTTTTTTTGTTTTTATTTAAAGGAATTGCTTTAAGTAGTGATAAAAGTCCTGATTGAATATATGGAAAACACTTGTAGTAAAGACTACAGGTTATATTAAATTAATTAACAAGTTAACGGTCTGATTGTCAGTATATGTGAGGAAAGATGAACTGGTTGAAATAACCATAGAATGA
ENSMUSG00000066392	Nrxn3	E020	0.00182521	0.306247	recognized	414	recognized	110	TGCTCCTAACTCTACTTAACAAAATGACTTGGAGGGACGCATAAAAACCTAAGGCAATGCTCAATGTTAAAAGGTGGCATTGCATGCCTGTACAGAGGTGTGCCATCTATTACTGATGGCCATTAAGGGTGTTTGTGGCCTTTTACCAAGGATGCTTTACTAAATATCTGTGTATATTTTACACCTGTACAACTCAGTCTCTCTTGAATTTTGTTGGTAAATTCATACTGATAACTTTCTGACGTCTAGAAACTG	TTGTTTATAAGAATAATGACATCCGTCTAGAGCTGTCTCGCTTGGCCCGGATTGGAGACACCAAGATGAAAATCTATGGTGAAGTTGTGTTCAAGTGTGAGAACGTGGCCACACTGGATCCCATCAACTTTGAGACCCCAGAGGCTTACATCAGCTTGCCCAAGTGGAACACCAAACGTATGGGCTCCATTTCCTTTGACTTTCGCACCACTGAGCCCAACGGCCTGATTCTCTTCACTCACGGGAAGCCTCAAG	GTAAAAAGGGCTTAGCATTGAGACCAGAAAACTGCAGTAGCTGATACATCCTTGCCTTCCCTAACCCCCAGCTAGCTTTCAGGCTTTATGTATTTATGATGACACTAACTTGCATGCTCACCTGTCCCCCTGCTATTATTTCTAATGGCTACTGTAAAAATGATATTTATCAACAAGATGCCTGTCTTGTGGATGGCTAGTATTCTTAGCTTCTCTATCATTCTGCACAATGTTCTCAGCGATAGTTCTAAAACC
ENSMUSG00000022016	Akap11	E007	0.00186239	0.0609067					GAATAATCTGAAGAATGAATAGCAGAGTTATTGGCCGAGTCCTGGGAGTGAGGGCTTAGGAATCACCATCTAGTTTCCTCTTCTGAAGCTGCTATGATAGAAGAGGAAGAATAAAAACTGTCCAAGCCATGTGTAGAAAACTGTCTCGACCATAGAAACAGATATTAATCTCAGAGTAGTAAATATACCAGTCTAAACTCTTGAATAAAATTCACCCATTTCCTTTATTCTGATTACCTGCTTCTTAGTTGATGT	TGCTAACAGCATGCCCAGCATTTGTCACAGCTGTTGTCATGATTTCTGTAGTAAGGCTCTCAGCAAAGCTAATGCCATCTTGTCCGATTCCACTATCAGCTGCCAAACTCGTGTTGCTCAACTCTCTCTCTGCTTTCTCAATAGCTTCAGCAACTATCTTCTCAGCAAGCACTGCCCTTTTATCAAGATTAACATGAATCTGAGGTACATCAAGATGAAAAATTCTTGATTTCTGACGAATGCTACTAAGTTTTG	CTATAGGAAAAGAATATTACATTATTCTAGAAAAATTATTTTAAAACACTGACTTTAAACACAAAATGTTTATATCATGACTGTTTTCTATGTGCTATTTAACTGAAAGTTCATCCCCAGCAACACTTACAAGTCACCTTTTAATAAAATAATCCATTTTACCCTGTGCCTTCAGATACATGCCTACGGGAAAGTCAGCTCCTTGTTAGAAAAATTACTAGTGACTGCCAGCTAACCACTCTGACATCTGAACAT
ENSMUSG00000033960	9430020K01Rik	E004	0.00186239	-0.0715273					GCTTCAGCAGGAGACCTCACCTCAGAAACTACAGTGGTCATACAGGGACAAAATTAAGAACAATATGAAAGCAATTGAGAAGATATCCAGTAGCCACCATCAGTCTCTGGCCTCTCCTGGAACACAAGTGTGTGCACATATATACATACTTTCACACACACTCTCTCTCACACACAAAGAAAACAACAAAAAGAATCGGCATTAGGCCAGGGCATTAATGCTGGTTAAGAGTCAGTAAATTTATTATTGTTTATA	TTCCTATGATCCAAGCCGAGTGGAGAGGGTGTGATGGCTGCTGGTGGAGCCCCCACCACCTGCTAGTGGAAAGCTCTCTGGTTGGCCCACCTGTCTTGCTCAGGCAGAAGCTGGAAACTGTGGGGTTTGCAGTGTCCCGGCTCCTCCTTTGCCTGCCACCCCTACAGAATTGTTACGAAGATAAAGCAGTGATCTGCTGACACCATCTGTCTCTATAGCATGGATATGTAATCCCTATATTTAGAACAGAGTATT	ACCTCTTTGGTATTGTGTCTTCTTTACTGGGACGGTGGATTTAGGGTCTCACAGAGTTGAAACCCACAGAAGGATCAGTAACAGCACAGGCAGGTGTCACCCCATGGCTCCCAGAATTTATTGTTTGTTTGAAATGATTAGATAATACACCACTGCCAGTCCAGTGGTTCCAAAGTGGTGAGAGCAGCAGAGGTCTGGTGAACTAACAGTTGTTAGTGTTAGGGCGCACGGTCTCCGGGATCGGCTGAAAGCAGG
ENSMUSG00000061601	Pclo	E020	0.00190527	-0.276637					CCCTGAGGCTTCTGAGAACTCATTTTCCTTTTTTCTTTTCTTAATAATTAGTTATTGATTATTTGGGAATTTCACATAATATACCCCATCCCACTTCCAGTCCTCCCAGGTCCAGCCCCTTGTACACTCTCCCACAAAAAAAGCAGAAAGATGAAAAAAGAAATAAAGGAAGGAAGGAAGGAAGGAAGGAAAGAAGGAGGGAAGGAGGGAAGGAGGGAAGGAGGGAAGGAAGGAAGGAAGGAAGGAAGGAAGGAA	TATGCAGGTTCCCACCATTGAGAAATCCCACAGTAGTCCTGGTAGTTCAAAATCATCATCTGAAGGCCATCTCCGATCTCATGGACCATCTCGCAGTCAAAGCAAAACCAGTGTCGCCCAGACCCACCTGGAAGATGCAGGGGCGGCCATAGCCGCAGCTGAAGCCGCTGTGCAGCAACTCCGCATTCAACCAA	GTAAAAGACGCAAATAAATTCCTCAGCATGGCAGCTTAATGTTCATCTGTTGCCTTCCTCTCCCGCTGTCTTTCTCCATTTGCTTTCTGTTTTTTGGCATCCCTGCTCACTCTGTTCTGTCCTTTTGTCTGTGTAAGAACAGTATCAACATATAAATATGCTCTTCTTTTAGTTCCTCTTGGTTTTTTCTGTTTTGTTTTTTTAATTTACATAGACTGCAATAAAACTGGCTGTTTCTCCTTTGTTTCCACCATC
ENSMUSG00000041268	Dmxl2	E044	0.00194388	0.253335					CATTTTGTGAACCAAGCATGATGGTACTGTCAGCACATGGGAGGCAGTAGGATCTCAAGGTCTGAGGCCAGCACAGTCTACATAGCACGTTGCAAGATACGGTGGCTCAAAAGAAAAATAAAGAAGAAAAAAGATTTTGTTCATAAAAAGTAGTAATTTTAAAACTTTTATTCTCTGAGTGGTGGTGGCACATGCATTTAATCCCAGCACTTGGGAGGTAGAGGCAGGCAGATCACTGAGTTCAAGACCAGCCTG	TACACGCCACAAAATAAGTTCACTGTAGATTGCATTTGGGTCATGAAATGTACGGGTTGCTGCATTTCTCAGAGGCTGTTTTGATGAAGCTTTTGTGTGTTTTACAGGATCTATTAATCTATTTACTTTACTGTCGGAGTCCCACTGACAGTCTGATTCAGGAGTCAACAGAGCATTATGATGGGAAGATGTCAGCAAGAGGGGTAAAACAGAATGGCATGCCAGGTCATTGAGGTGGAATCGGTGACCACAGTA	CGTAGGTGCTAAAATATTCATATCGGTGCTGTGTGATGGAGAGTGTAGCTGTGATCCATGGGGACTATCTACAGACATCATCTCTTGCTGGGATGGGTTGTATGAATCTTTTGTAGCATTCACACAAGCATACATCATGATGTTTTTACTAAGAGAGTTGGCGTCCCCAGAGGGAAATGCAACAGGAATCCGAGAGGAAAAAGAAACCTGAAAAACACAAATTGGTGATTCATTATAAGGAGTTTGCCTTCTTTC
ENSMUSG00000016150	Tenm1	E001	0.00197915	-0.118471					AGTACATAAAAATGTTAATTGTCAAAACCTGTAGTGTAGGGCTTATATGGAGCTGTTGTTTCTCTTTATAGTCTGTCATGATTGTCACTTCTGCCTCCAAATATCCTTTTATTTTGGCAATGCATTAAGATATCATGGTCTTCTAGCTCTCCATCACCAGGTTATTTTGTTTTTATTAAATTTTTCTTTATTGCTGAGGAAGGCACCAGAAAAAGAGAGCAAGCCTTTTGAAAAAGTCATAACCTGGAGGTATTT	TCATTTGCGATTTTATTTTTTAAAAATGAAATATTCAAAGTACTTTTCTTTCAAATATTGACACATAATGTTTAACTTTTAAGTATTTACAGCATGTTGTTGTGATGCTCTTGTAGAAAAAAATGCATGCTTCTGGCCTGAAAGCCAGAGCAAAATGCAAAAGAGCATGGAACTGCAGCCAGAGAACATGAACCTGTAAGGTGTCCAGTCACTTTTCAGCACAGGAGAGCAGGAATACAAAATTGGAACCTATTG	TTTTGTTTTGTTTTGTTTTGTTTTGTTTTAAAAACAGGCAGTCTTTGGTGACGCAAAGGCAGAGATTTCTTTTGTTACCTCCTGCCTATTTCACTCTGTCTCATGAAGTGAATATTGTTGGCACTGTCTGAAAGTTCTAAATACTGCTCAACAGACAAGACAAAATACCCATCATACCCCTGCACCCTCCCGGTGCCCAAAAGCTGCTGCTTTTCTCCCTCTGTCCATACCCGAGTCCCTTCTTCCCCTTCCTGT
ENSMUSG00000058230	Arhgap35	E007	0.00203744	0.0746587					GGCTTGGCCACTTGTCAGGGCACTGAAGGGCTCTACACCACCTGCTCATTTGGGTAACTACTGCTCTAGGTGAAGGCAATCCCATGAGAACTGCCAGTAGTAGATATCTAATACACAGGCTAACTCTTAACACCAGGCCAAAGAATGAATGTACTCTCGTGGTCATGAAATCTCACATCCAATATTTTTTTAAAAACCAAGCTGTCGGGCTGGTGAGATGGCTCAGTGGGTTAGAGCACCCGACTGCTCTTCCGA	TTGGTGTTCCTTCTTAGACTTCGAAGGATATTCCTCCTCCTGGGGTCCTCATCTGTTTCATATGGAATGACAGCATTGTCCCCTTTATAACCTTGGGATGCCTGGTCCTCCTCTTTCTTTCGGATGGGTCCCAGCTCATCATCACTCCCGACACTGAAGCTGGTACGGTAACTAGCAAACCGCCCCAGGCGAGTGCATCTTGTCCTGTACAGCACAGGCTTACTCACTGCAGATACCTTGCGGCCTCGCTCTAGG	CTAGACAGAGGGGAAAAAGAAAAGCCATCAGCATCCAAATTATTTTAAGCACTGAATTACAATAAAAGTATTTTTTTAACCGAAGAAATATTTAGTGAACCTAATGTGTCAGGCTTTGTGCTAGATGAGTAATTAAGGCTAACATCAAAGTTGTAGAAATGGCTCTGGGGGTAAAGGTATTTGCTGTGTAAGCCTGACAACCCAAGTTTAATTTCTGGATCCCATGGAGAAAGGATAGAACCAATTTTTCAAAGT
ENSMUSG00000058571	Gpc6	E017	0.00224891	0.387875	recognized	483			GCGGCAGTGGTTGCATGGATGATGTGTGTCCCACGGAGTTCGAGTTTGTCACCACCGAGGCCCCGGCGGTGGACCCGGACCGCAGAGAAGAGGAATCTTCGGCCTCGAAGTTCAGCTCCTCCTTGATTTCCTGGTCTCTGGTCTGCATGGTCTTGGCCCTGCAGAGACTCTACAGATAATCGTGGGCTTTGGTCAGACGAAACTGCGTTTTAGCTCTTCTGTGGCCAACACCCTTCTTTTCTTACACTCTTGAAC	GGGGGTTTTGGTTTTGTTTTTTTTTACAACCCATTTAAAATAGGAAAAAATAATTTTCCGTTTCAAATCAGGCCAAACCCCAAGACAACTGCATTCTCAACAAGGAAACAAACAAAGGAGAGAAAATAAAGGAACTTTCATGCTATCAGGCTTGGCACTGACAGCCAACTCCTGGAGTGAGCTTTTCTGTGACAAGCGAGGTTTACAAAGCGCTTATGAGGAGAAAGCGTAACATTTTCATGTAGTGGAAATACA	AAAGAATGTTATTCATGAAAAAAACAAAAAACAAAAAAACATTGCTCTCTGGTACAGCACCTCTGGCCTTGGACTTCTACCGGGTACTGTACTGAATGGCCTAGACTCAAGAGGCCATTTTAGAGCCACTGCCTAACCTGTCCACCAAGCCAGGCCCAATGCTTCCTCTGACAGAAGCGAAATACACCAAACTGGGGTTGTATGAAGACAGTTGGCTAACCACCTTCTCCTCCTCCTCCTCCTTCTTCTTTCTTC
ENSMUSG00000056342	Usp34	E017	0.00227957	0.263329					ACTTTTGATTTTTTTCTTTTTGAGGGTTATATTCATTTCGCAGTGTTCAAAGAAATATGGCAGGACTGTTGTTAGCATTTTTAAAAAGTATGGTGTGGTCAGGTGGTGGTGCACGCCTTTAAATCCTAGCACTTGGGAGGCAGAGGCAGGTGGATTTCTGAGTTTGGGACCAGCCTGATTTACAGAGTGAGTTGCAGGACAGCCAGGGATATACAGAGAAACCCTGTCTTGAAACAAAACAAAACAAAACAAAAA	AATCCATGCAAGGAAGTTCTGATGAAACTGCCAACAGTGGTGAAGATGGAAGCAGTGGCCCTGGTAGCAGTAGTGGGCATAGTGATGGATCTAGCAATGAAGTTAATTCAAGCCATGCAAGCCAGTCTGCTGGGAGCCCTGGAAGTGAGGTGCAATCAGAAGACATTGCAGACATCGAGGCCCTTAAAGAAGAAGAGGAAGAGGAGGAGGAAGAAGAAGAAGAGGAAGAGGAAGAAGATGATGAAGAAGAAGAAG	GTAAGCATGCTTAAGAATAAATGCTTAGTTTGCATTTTTTGTAGTAAAATATTGCTAGTATTTCTTCAGTTGATATTTATTTTAGTGTAATACTATTTATAAGTAGTGTAATGCAAAATATAAATGCAATTTTCAAATAAGTAATTTAAAATTTTATTGTTGTCAACTTAAAAGAAATACAAAATAAAGGCTAAGACTATGATTGTTGCTAGTGTACCTCAAAGGTCTTGGTTCACTCCACAACACTGAAAAAAG
ENSMUSG00000095118+ENSMUSG00000064791+ENSMUSG00000096263+ENSMUSG00000015656	Snord14d,Snord14e,Snord14c,Hspa8	E038	0.00238616	1.047					GGGGTCCCTCAGATTGAGGTTACTTTTGACATCGATGCCAATGGCATCCTCAATGTTTCTGCTGTAGATAAGAGCACAGGAAAGGAGAACAAGATCACCATCACCAATGACAAGGGTAAGTATGGACCTGCTGCTTTCTTTCTGAATAGAAAGAACAAGGTTTGCTCTTACCATTAAAGAGACATGCTCATGATTTTGTAACTTTCATCATCAGGCCGCTTGAGTAAGGAAGATATTGAGCGCATGGTCCAAGAA	CACAATGATGATGAATGGTCCAAACATTCGCGGTTTCCACCAGAACGCAAGGCAGTGTTGGCAGTTACCTTCCTTGGATGTCTGAGTGA	CTCAATAGCTAAGGGTTCTTTAGGCTTAGTTGTCAGTCTCCTCCCCCCAAAGTAATTGGAGATCTTTTAATAAATTTGATTTCTTTTTTCTCAGACTGCAGAGAAGGAAGAATTTGAGCATCAGCAGAAAGAACTGGAGAAAGTCTGCAACCCTATCATTACCAAGCTGTACCAGAGTGCAGGTGGCATGCCTGGGGGAATGCCTGGTGGCTTCCCAGGTGGAGGAGCTCCCCCATCTGGTGGTGCTTCTTCAGG
ENSMUSG00000026235	Epha4	E001	0.00249385	-0.0753072					TAAATGCCTGTTATCCTGTACTCAGGAGGCTGAGATTTTGGAGGCTAACCTGGGTTACATAGATGGTGACGTTTTGTTTATTTTTCCAAAAAAATAAAAAAACAAACAAAAAATAAATGTTTTAATTAAAAAATTAATTAAATATTTAGAATCTTCTAAGTAAATACATTCAATCCGGAGTTAAGATTCTGTGTTTTCTCAAATGACAAATTATATAGCAATAGCATATAAATTGAACATATTGAAAAGATATAA	AGGTTTGTATACGGCAACTACTTTATTACTTTCAAATGCAAACTCTTTGCATTTAGTTTGCTATTTTACAACTTTACAAACTAGGTATAAAAGACCATAAATAAATGACATAAGTTATGTGTACCTAAAGTTCATGAAGGGAAGAAAAAAATACCTTGACAAATAAAAACAAAATAGAAAAATCTATGGCTAACTCAAAAGATTGTTCAAAATTTGGAACATGTATGAACCAAGAGATGTTCAGCTAACTTCTTT	CTGGAGAGAAAAGAGAGACAACAAATGTCAGCCAGTATTACCAGCCAATAGTCAACCAATCAGCTACACATCACGCTTCTATCAAATAGAAGCAAACACACAACATTTTGGGTTCCCAGAAAGTGACGAGGCTCGGTGCGTACTGAGTCCCATTAATATGTACCTTGAATACAAACTAGTAAGAACAACTCACTTGTCAATACAGAGGCTGATTATAATTACCCTATTATTGTTGTTATTGTTTGAGACAGGGTC
ENSMUSG00000005583	Mef2c	E013	0.00252192	-0.0327173					AATACAGGCATTGGTAAAACAAAAAAAGTCCCATTCAACAATCAAACACCATCTTCCAAGGTTCAGAAAATTAAGGATTGGAAATAGTATAAGGGGAAAATTCCGTGAACACAGAACGACTGTTGTACCATGTCTTAGTCCTTTATGAAAAGGTAATCTATACAGTTACAGAGTCTCTTAGGAGCTGGAGATGATTCCCTGAGGCCTGGGCCAGTTAAGTAGTGTGTTTACCACCAGGCACAGCCATTCTCCATG	GACCGTACCACCACCCCTTCGAGATACCCACAACACACCACGCGCCACGAGGCGGGGAGGTCTCCTGTTGACAGCTTGAGCAGCTGTAGCAGTTCCTACGATGGGAGCGACCGAGAGGATCACCGGAACGAATTCCACTCCCCCATTGGACTCACCAGACCTTCGCCGGACGAAAGGGAAAGTCCTTCAGTCAAGCGCATGCGACTCTCTGAAGGATGGGCAACATGATCACATTATTACTTAATAGTTTTTTTT	ACAGTGTCTGTCGTGCGTTTTTTTTTTTTAATTAATGTTTTGCTGTTTAAATTTATTCCACTTTATCATGTTTTTTTAAAGCAGTTTTTCCCCCAAGTACAAATGAGCTTTCTCAGTTTTCAGCTCAAAATGTATGGAAAGATGGGTATGTGTGGGAAGGTGTGAATTGGGTAACAGTTCTTAAGATAATATTCAGCCAGTTTGGGAAGTTGAAGCATTTTACAGACTAGTTCAGCTTCTTTCTCCAAGCAGCTC
ENSMUSG00000053141	Ptprt	E003	0.00252192	0.151871	recognized	37			ATTTCCTTTCATATTCTGTCCTTGAAGGCTCAGAGGCCAAGGTTGTTGACCCTGCTCCATGGTAGAACAGAGACCCTGGGTTTTACGTAAGAGCTCAGTCTCATGATTCACTCCATATTTTGTTCCAGCAACAAAATAGTGAGCACACACACACACACACACACACACACACAACATATTAAAAGCACACACTGAGGGAACATTTTCACAGTGTCTGATGAAAGGAAAATAGGCTGTCCTGCTGGTCCAGAGAGA	TGTCTGTTGAGCCCTGCCTGGAATGGATGTTGCCTAGGAAGCTCTAGGCAGAGCAAGTCACTCTCACACCAAAGCTCATCAAATGCTTGTATGCTCCACTGTTACAATGTGGCTCAGCTTCTCTACAATACAGTGGGCCTGAAGGGCAAGATGTGTACCTTATTGGATTCTGTGTCCCTCATACACCGAGACTGGATCAGTCTGCAAGATAGACCTTCCTAGACCTCTGGCTATTAAGGCTGTCAGATATTGTGG	CTGAGAGGAAGAGGAGGAGATGAGAAAGAAAGAAAGAAAAGAAAAGAATGCATTAGATTAGAGATGCAGATTTTGGAGAAAACTACCTGTAAGCATACTAAAAATCAAGTAAGTAGCCGTATCTCATGTCTGAACATCCTTCAACTCCTGACTGATGCATATTCTGCCTACACTTCCCAGAATCCCCACCTGTGATTGCTCACTTTCAGTTATTCCATCACACACCAAAGGTTCTCAGTCTATAAGCTTTGTGCA
ENSMUSG00000008730	Hipk1	E001	0.00255067	-0.0784171					GGATCAGAGGTTCTTCTTGTTTTTAAGAGTTCATTATGTGTCTGTGTGGGTATGCACCCTGCAGCTGGAGTTAGAAATCACTTGTGAGGGGTCTGACTGGGTGCTGGGAATGGAACCCAGACCCTCCATAAGAGCAGCAGGTGCATTACCGCAGAGCTGTCCCTAAAGAGGTGACAGCTCTAACAGGGCCTAAGGAGACAGACAAAAATATCTTTCCCTAAGTTTCATTTTCACTGTGCTGATTTGAATGTTTGG	CAGAAAATTTACCCATTTTATTGATGCATTGCAACTGCTCTACTTTTTTACCATATTATGTAGAAAATACTGAAAATACAAGCTACTTTGTAAAACCAAAGACAACAACGAATCCAAAGATAAACTATGTTTTACACAATGGACCCTTTTCCCATAGTTAGTATTAAATTTTAAATAGCTATTTCTTTTGTTAAAATGATTTTACATACTCCCTAAGTACACCTGCATTACAAACATAGATCAGTAATTCTCAGA	TCCCCTCGTAAAGAAGAGCTTTACTTCATTTTAAAAACATTTATAGAAACCAAGTCAAAGAGACCAAATGTATGACAGAGGGTAACTTCAGAACGATCTTTCTTCCTTGGTAACTGCAGAAGATGGGCTTCTGAGCTCTTCCAACGTCCAAAAATGCTGTCACAAGAATAAAGAATTAAAAAAACAGGGCAGACTTGGGAGACTGCAACAATGCAGTCAACACCGAGAGCTGTTCCCCAGGGAAAAGCCTTCTGC
ENSMUSG00000019790	Stxbp5	E017	0.00255545	-0.704853					TTTTCATATCCTTGTTTGTTATTAAACATATTTTCAGTGTATAAACAACGCAGTATTTTTTCAAGTTGAATTTTATAATGTGACCCAAGCAGGAATACTGTATGTGTTACAGAAGGGCCTCATTCTTACCTGAAAGTCATGATATGGCCATTGGCACAGAAGCAGGCGAGGCAGACACTGTTACTCAGTGCGACAATGTCTCCGCGGAGCACGAAGGACGTCTCGGTGATGTTCTGCTTGTATGCACAGCTCTGG	TAGAATGTAGAAGTTTAGTAGATACTTCCATTTTACAATTCAGAGTAAATATGCTTATTCCAACTCTGATACTAAATCCACACACATCTGTTGACTCAACGCTGCACTGGATATACAGGCCACTGATAAAATCCAAAACCCAAGCCTTGTAGTCAGCGGTCTGAAAAACATGTCATTATTATATGTTCCAAACATAAATGTCAAATGTTAATAATTTACAATTAAATAATGAACTTTGCACACACATACACATTT	CGCTTGGAGACACAATCACTGGCTGAAGGAGTCTCTGCTCAGGCCCCGGGGGGAGATTCAGCGTGATGACAAACGCAGTTCCCACTGTAGTTCCGACCCACAGGCAGGGGGAGGGGGAAGAGTCGGCCTTCCGCGTCAAAGTCTCACAGAAATGAAGAGCAGAGATGGTTTCCCGGGACTCTTTGTCAATGCTGGTTACACTTGAACTCCGCGATCTGCTGAAGGAATTGTCTTTTACATCTGAAATGATTAAAA
ENSMUSG00000018411	Mapt	E036	0.00256986	-0.0441368					ACCTTATCATTAATCTCACTCTCTACATCTTGCAGATTGAAACCCACAAGCTGACCTTCAGGGAGAATGCCAAAGCCAAGACAGACCATGGAGCAGAAATTGTGTATAAGTCACCCGTGGTGTCTGGGGACACATCTCCACGGCACCTCAGCAATGTGTCTTCCACGGGCAGCATCGACATGGTGGACTCACCACAGCTTGCCACACTAGCCGATGAAGTGTCTGCTTCCTTGGCCAAGCAGGGTTTGTGATCAG	AGGGAAAAAAAAACATGTAAAAACATGGCCAAAAAATTTCCTTGGGCAATTGCTAATTGATTTCCCCCCCCTGACCCCGCCCTCCCTCTCTGAGTATTAGAGGGTGAAGAAGGCTCTGGAGGCTGCTTCTGGGGAGTGGCTGAGGGACTAGGGCAGCTAATTGCCCATAGCCCCATCCTAGGGGCTTCAGGGACAGTGGCAGCAATGAGAGATTTGAGACTTGGTGTGTTCGTGGGGCCGTAGGCAGGTGCTGTT	CAAAAATCTCTGTTCATGAGTTCCAAGTACAAGAAAACAATGGTTTACAAGTTCTTTCCCCCACTTAGAAAATTCAGAACAGGAAATGAAGGTAAATGCCAGACACTGGAGTGAGAGCTCTCTTGGTTCATTCTCACATTCCTCTGCTGGCATACTACCCTCCGACAAACAGTACTCTGTGCCTTGGCTTACAAGGCAGCATTCAAGAGCTCCTAAAGCCTGCGCCAGTTCATGCAAGCTGAAGAAGTTTGGCGT
ENSMUSG00000035770	Dync1li2	E001	0.00274429	-0.0385586					GATTTGAACTCCGGTCCTTCGGAAAAGCAGTCAGTTCTCTTACCCCCGAGACATCTCGCCAGCCCCAATTGTATTTTTTAAAAAGTCTTTTTACATGTGTATGTGTGTGAGGTACCTGTCAAGACTCCTGGAGCTGGAGTTACACGCAGTTATGAGAGGTCTGAAGTAAATTCTAAAATGGACCCAAACTCAGATCACCTGGAGGCTAGAGGAGCTGTGAGTCCTAACCACTGAGCCATTTCTTCTGATTATTCG	ACCTCTTAGCAGTCTGGATTCTTGTTTATTGAAGCCAGTAATTAGACATCTCTTCCCCCAGCACTAGAAAGCAAGGTTCCACATGACTGCATACTGCACCCAGACAGAGCCACACCCTGGACTGAGGCTGACGGGAGATCGTCCGCAGTCCTAATTCGAAGTTAAAAACACCAATGAACTCAGCAGAGAGACAACAGTGAACTTCCACTTACAGCATCAACATTGTTAAGGTCGTGATGTACAGAGCAGTCGCTC	CTTAAAGAAAAGAAATGGAACAAGAAAGAGAGAGAGAGAGAGAAAAAAAAACAAACACAAAATAGCAGTGTGAGGAAATAATTTTGTTTTCTATGCAGGGTTTCTCTGTATAGCCCTGGCTGTCCAGGAACTTACTCTGTAGATCAGGCTGGCCTCAAAACCCATCTTTCCTAGTGACAGCATCCTCAAAATGAGAAAAGTCTTTTCAACAAGGATAACAAAAAAACCAGACCCTAATCTTGTTACTGCCAGTGC
ENSMUSG00000032827	Ppp1r9a	E009	0.00278714	0.156412	recognized	440			AAATACCTCAAACTTGGTCTAAAGCATTATTGTCAAGTGGTGTCAAGTGGTGTGTGCATGTGCGTGTGTGTGTGTGTGCGTGTGTGTGTGTGTGTGTGTGTGTTTTGCAAGCATCTCCAAGTTATGTTTGTTACCAAGGACAAACTAGAATAACTCCGTAGCTTCTTAACTTTAAAGTCCCATTTCGAGGTAATTGACTTGATGTGTGGCGAAAACACTTAGAAAACAAGGTGTTAAGTGTTGACTAGTTCACTG	GAGCATTGGCTTTTCACCCTTGAAGTAAACATGTTGAAGGCGGAATCTTCAGGGGAGCGGACCACTCTCAGAAGTGCCTCTCCTCACAGGAATGCGTACAGAACAGAGTTCCAGGCACTGAAAAGTACTTTTGACAAACCCAAGTCAGATGGGGAACAGAAAACGAAAGAAGGTGAGGGCTCCCAGCAGAGCAGAGGTAGAAAGTATGGCTCCAATGTCAACAGAATTAAAAATCTATTTATGCAGATGGGTATG	AGTCCTGAGGAACCCTCTGCTGAAAACCAGGCAATGCCAAAGTCTCATATCCTTTCCCCACGGAACGAGCCGTTAGAAGATGCTGAAGCTAATGTGGTTGGGAGTGAGAGAGCTCAGCATCAGAAGAAAGACCTGACAGGTGGTGACCTAACCTCCCCTGATGCTTCTGCATCCAGCTGTGGAAGAGAAGTACCTGAAGACTCAAACAGTTTTGAGAGTTCCCACGTATACATGCATAGTGACTATAACGTGTAT
ENSMUSG00000028528	Dnajc6	E031	0.00305524	-0.0538164					GACATGAAGTCATGATTGCAGTGCCTTTGGGGAACGCGTGTCTGAAATCCATGTTTGATGTCCATCCCTCCACGCTCCTTATGACTAAATAGGATAATTAATGGGAAATGTTAATTCATGAACTTTAATCAGTCATAAGAGAAGTAAGAGCCCACAGAAACTGGCAAACTGCCCTACTAGAAGGAGTCTCAAAGACCTACACTTTATAGGGATTGGAAAGGGGGAGTTTTGAAACACAGTCAAACAAAGACATCC	CAACTGGGCAACCCTATGAACAATACGCAAAGATGATTTTCATGGAGCTAAATGATGCCTGGTCTGAATTTGAAAACCAAGGCCAAAAGCCCTTGTATTAATTTGTGAGCTTTTCTATGCTGGCTGCAGTCCTGTGATAATGCTTAGTGTGTACCACAGTTCTGAGATTTTCACAGATGAACCAAAAATTCTAGTAATGTATTTCCAATACTAAACTGTTAATTTCCTCGTGAATTCACTTCTCATGATAAGGAA	AAAAAGGATACAAAATACTTTTAGAAATATACATTATTTTTGTACCTGCGGGAGTACGAGGGGCCAGAGAGATGACGCAGTGGTTAGACGTGCACACTACTCTTGCAGAGGACCTCAGTACCCACACTGCCTGTGTCTTCAGCTGCAGAGGGCTCTGATGCCCTCTTTTGGTTTCCACAGGCACTTGCATTGACGTGCACACACCCCTCCTCTATACACATGATTAAAATAAAATAGATCTTAAACAAGCAAAGA
ENSMUSG00000026959	Grin1	E032	0.0032232	-0.682638					AACCTAGACCAGATGGCGGCCTTGGCTCCCAGGCAGAATCCCAAGGATGAGACGAGGAAGCCAGCCTACTCACCTTGCAGAAAGGATGATGACCCGGGCTTCCAGGTCCCGGGCTTCCATCAGCAGAGCCGTCACATTCTTGGTTCCTGGGTCAAACTGCAGCACCTTCTCTGCCTGTGGTATGAGCAGGAGCGTTAGCAAGTAGTTGGGAAAGGGAACATTGTGCCTCAGTGGCAAGAGTTGGGCCAAAGCTGC	ATTTAATTTAATTTAATTTAATTTAATTTTTGCTCTGAGCATGCAAGCTGAAATGGACGGAGACTTAGAAAGAGACGTGCAGCGAACAGGAAATAGAAAAGTTTTGGAAGGCAACTAGGAACAGAGATGGGGCTGACTTTTCCAAAACCTTGGGAGATCTCAGCTCAGACCGGATTCCTCTTGCTCCTATAGGAGCAGCCCAGACTCTGAAGTGACCAGGTGGGCAGGCTCCCTCCCTGGGTTCCGCTAGGAAAC	CTTGGGTCCGCGCTTGTTGTCATAGGACAGTTGGTCGAGGTTTTCATAGTTCCTTTTTTTACTCTGATGAATAATGTGCACAGAGAAAATATGCAGACACAGAAGAAGATTATAAACGGTTGAAAATGACGGCGCTAAAGCAATCACACCACCTCCTCGGCACGTCTGCAGACGGGCACGTACCTGGAGCTCGCAAACACCGAGACCCGGGGTGGGGCTAAGGACGGGGGTGGAGCTGAGGGGGGAGGGGACACA
ENSMUSG00000027799	Nbea	E037	0.00331108	0.145223			recognized	34	GAGCTCGGTCGGCATTTGACAGATAACAACCCCCGCTCATTCATGCATTTGTTTGAGCTGGAGCTCTTCTATAATCCCCAGAACGAGACGGGCCCGGAGCACAAGGTTAGCATGAATACCTCAAGAACAGAGGTGGAAATGTAGTCAGTTATAACTGTAAGCACGGCCAAGACCTTAATGGTCCTATTTTAATTTACTGCAATGTCTAATATGACAGAAGGATCTAGGCCAGAGGTGGAGTAAAATTAGAGAAAT	TGTGTTGTAGCAGTGGTCTGGATTTTTCGGATTTCCTTTCCCGATTCTTTGCCATCATCAGATCGCTCAGTGTCTGAAATTATACTTCCTGCATCAACATTTGGTACAGCTTTGCTATTGGAAGACTCTGTTTCCAAAGTTGTGGCAGTCATTTCCGCATAGTCTAACCCCTTAGTTGACGATGCTAACTCTCGTTCAGAGACACTGCTCACTCCATCTGACGTCGTATGAATTCTGAAGTCTTTCTCTTCCATT	CTAGGAAATAAGTGAAGAGGACACTGAGGTGCCATGCATGTGCCAAGGGAAAGGGAGAAATAAGAGCAATAAAGTTACCATGATATAAGCTAAATGGTATTAGGAATTTTAAGATTTAGTTTGATTAAATAATAAAAGATTCAGTTTTATTACGTAATTGGAAACAATGATGAAATACAGTGATACACTGTTTCTTGACTTGTCTCTATCCACATGTGTAACTGCAATTTCAAAGCTCCTTTGTAGAGGTTAAAT
ENSMUSG00000048388	Fam171b	E010	0.00333045	-0.0504387					TATTTGAGGGCTTTTGCCTTGTCTTATTGTATCTTGTTTTATCATGTTTAGTTATTGTCTCTTGGAGGCCTGCTATTTTCTGAAGAGGAAACATAGGGGGAGTGGATCTTTTCCAGGGATGGGAGCTAGAGGGGAGACAGCAGGAGTGGAGGGAGGAGAAACTGTGGTGGAATGTACTGTATGAGAGAAGAATCTATTTTCAACAACAACAACAAGCCCACTTGCTCTTCCAAAGGGCCTGAGTTCTGAGCCCAG	GGAAAATGTGCAACACCACAGAAAAGAGAAAGAAATATCACGAAGCTTGAGATCCTCAAGAGAGATCAGACAACCTCGACAACACATATAAATCATATCAGTTCAGTCAAGACTGCATTAAAAGCTGAAGATAAACCACAGTTGTTCAATGCCAAAACTTCCTCCTACAGTCCCCAGAGAAAGGAAACCACAAAAACGGAGGCAGAAGAAAGAATTTCCATGGTGAAAACTCGGGACAACTTTAAAATCTACAAT	TGCTTGTAGTGTTTAATTTCAAATAAAAGGCAAAGGGTTCCTTCCCAATGTAGTAAATATTTAATCCTCATTACTTTCTATTCATTATGCCCCACAGTGACATTAGCCCCGTGTCTATAATGAGACTGATAACCCCTTCCTCCTGTGTCTGCAGAATTCCCAGTTTTACTGTTGAAGCTGAGCATAGACAACTAGTTTTCCATTGGATGGGATTCATTACCTTCACAGGCCATTTTAAAATTATAATTTCTTTTT
ENSMUSG00000029152	Ociad1	E009	0.00338296	0.114865					AGTTATACTATAGCCCAATCTGGTCTCCAGCCCAGGATTTTCCTAAGTGAGCCTCTCGGGGGCTGATGACCATAATCATCATCATGTTTACTTAGTAACCATGTTTAAGGTGCCTAAGTGGGTCAGGACATAGCGTGACTGCTTTTATATTAGAAATAAACTTTATTCAACTGCTTATAAATAACTTAAAGTTATGAGTATTTTAGAAATTCATAGCTTTTATACCTTAATAAGGGCAATGATCCTTTGTTCTTA	TATGTATACACTTTATTTGATGCTCTTTTCTGCTGGATCTCACCTCTGCTACTGTCTGCTGTCAGCCTAACTTCATCCATCAGCCTGACTCAGCATGTCTGCTCTTTTTGTTGGTCTCTTCATTCATCCAACATACTTGGCTAGGTGTGAAAGAACAAAGATGGGCAAGGCCTGCTTTGTCAGTTTGGGCTTCTTGTTAGTTTGTCTTAGGCTACAGAAGTAGATGGGACAGTTAGAGATTGCCCAGGGCTGAAT	GCTACTTAATTCTCGTTGCTTGAAAGATTCTGATTATTCTCTGGAGCTTTAAATTAATACCCTTTATAAGAATTGATTCAAAATTTAGTGTGTATATTGCTAAAATAACATGACTAGTTGGTGGACCGACTTGCTGGAAAGTACTTTCTGTGTGGTGTATGAACTTGAGTAGGACAGGCACTGAATGTCTTCATCAGTTACGCTTTTGAACTGTTTGTATGGCCCTTTAGCTATGTATACACGTAGACTGTGTTG
ENSMUSG00000037855	Zfp365	E002	0.00341808	-0.0413347					GAGTGCTTCCTCTCTCTGAAGCCTGCTCTTAGTACAGCGGCAAGGATGTGCAGCAGCCACAGGCTGGGGTGGGTACGCTAGGACATCTGTTTATGGTTTCCGCTAAGAGTTGACAAGATAAAACTAAAGTGTTGGGAAAATTACACATAGTCATCGAGGAAGACAGGGAAGATGTGGAGAGGGCTTTTAATGAGCCTCCCTGGGTGTGAACATATGTTAAAAAGAATATTTAGATAGAGGTATTAGAAAGTATGA	TCCTGGGAACAGAAATACTCTAACATCTATACATTTGACTGGCCCTGCAGCATACTGGAATACAGCTTCCAAGCAAGCCGCACTTACACATAAGAATCTGTTATAGTTTGGGGAGAGGGTGGGGCATTGACACAACAGTTCAAATGAAGATCTTTTCCCCTTACAAAATAAATAATAAAATTCAATGTATACCTCAGTTAATTCTTGATAACAGTTTCCCAGAAACTTTGGTGATTTGTTTAAAAAGTCACTGCT	CTATAGGGGTCAGGAAGAGAAACGGAGAAAAGAGAGAGGCTTGTTAAAAGAAAGACAACTAACTACTCCTGTCTACCATGGCGACCATGCTCCCACACAGATAAGTCGCAGATACTAGAATTTCAATTCATGACAGTTCCTGTGACTGTGTCATGCTAAATCTAAGAGAAATATTACTAGCGCTACTACCAGTGATAAAACAGGTACAGAAAAAGTCAATGCTACCAGGATGATGTGCACGAATACAGGATGAAC
ENSMUSG00000045038	Prkce	E026	0.00341808	-0.0597155					TGAATTGCATCAGCTACCTGTGGGTAGCTGTGCGCAGTGTTGGGTTTGATGTATCCATCCAACCGCAAGCCAGAAGCAGCTTCAGTTCTTTTACTACAAAGAAAAAAAAAAAAAAACAACTCGAAGACTCTGGCTCTGCCACTGGACGTGGACTCCTGATTTCTCCCTCCTCCCATTCCTCCTCGTCTCCAGCCTGCCATCCCTGCCCAGCTACCTAAGAGAAGAGAGCAGAGTTTCTTCCACGGGAGGGCGGGT	AAGAAAGAAAGAAAGAAAGAAAGAAAGAAAGAAAGAAAGAAAGAAAACTATTACTACGTTCACTTTCTAATTGGCCAAAAGATAGACATCCCAACGTGAACACGGGTAGATATTAAAGGGCTAATACACGGTGAGAATCCAGTCATCCGACGTTTGTTATTGATGCTTTAGTGACACATGAGGTCTATGCAAAGAGAGCAAAGAAAACTCTGGCTTCTCATCATGAGAATTTTCCCTGAGCACAAAGACCACCAG	CTTCTCTGTCCCAACAAGGATGCCTCCCCCCCCTCTCTCTCTCCTTCTGCTTTTTGTGCACTATAAATTCAAAACTTCCAGGATGGCGTTATTACGGTCTGTTGTCAAGAGTGCTTGTCCATCATGAATGACGTTCTAGATTCAGTCCCCAGCACCCACAAACCTCAGGGCAGTGACACATTCCTGTGGTCTCAGCACTTGGGTGGCAGAGGCAGTATGACCAGAGCTTCAAGGCCATCCACGGCTACATAATAA
ENSMUSG00000061601	Pclo	E005	0.00341808	0.0839661			recognized	251	GAATGGCCATGTATCAAGGTAACTGGGGAATGAATGATGAACAGAACATCCACTGATCTCCTCTGGCCTCTCAGAACATACACATTCAGGAGAGAAAGAGAGACGGAGAGAGAGACAGACAGAGGGAAAGAGAGACTAGACTGACCTTTCCATTCCCTTTTCCAAACTTGACCTTCATCTCAAAGTAAATGCACTGGTACAGATCATATATTTGAAAGAAAGTAGAATTAAAATTTAAAGAGGGCATGATAGAAT	AAAAGGAAGAGGACAAATCAGACACTTCCAGTTCTCAGCAACCCAAGAGCCCACAAGGCCTGAGTGACACAGGGTACTCCTCTGACGGAATATCCGGCTCTCTTGGGGAAATCCCCAGTCTTATACCCAGTGATGAGAAAGATTTGCTAAAAGGACTCAAAAAAGACTCGTTCTCGCAAGAAAGCAGCCCTTCCAGCCCCTCAGACTTAGCGAAGTTGGAAAGTACAGTACTGTCCATTTTGGAAGCTCAGGCAA	GTCAGTATGATGTAGCCATAGACCCTGCCTTGAACTGTCATTACGGTGTGATGCATCTCGTTTCAGGATGAACAGTATCCCTGCTCCAGTTTTTGTTTACATTTTTGCTTTCTTTGGATGGTTTGGCCATATATTTTACAGTACATGTGCATTTTTGTTTCTCCGTGGTTCTTGCTGTTGTCGTTGCCTGCATGTGCCTGCATGCTCAACATTGCTTTTCTTCCGCATCTAATTAGGTTAACCTGTGGATTTGCA
ENSMUSG00000087503+ENSMUSG00000017740	Gm11459,Slc12a5	E036	0.00341808	-0.0618549					AAGTGTGCCACCAGCTCCATCGTCTCTCCTAGGTTTCTAGGGTCCCTCCTCCACGGAACCCTCAAGGGGTGTCCCTGGCCATTGCCCAGCTTGGAGTGTTATGGGGTTGGGGGAGGTCCCAGGCTGGCAAGCACCCGGCCGAGCAGCCAGACTCAGGCTGGGAGGGCGATCCGACCTAACTCTTCTTGGCCTGGGCTAACATCCGCACTTCCTCTCCTTTCTTCTGCAGGAACCAGTCCAATGTACGGCGCATGC	CATGGAATTCTTGGAGGTCCTCACTGAGCAACTGGACCGGGTGATGCTGGTCCGCGGTGGCGGCCGAGAGGTCATCACCATCTACTCCTGAAGGCCAGGACCTGCCACTCCGGCCCGAGCGCGCCCGGCCCGCGGCCCCCAGAGCCCTCGCCGCGCCTCCCCGCCGCTGTCACCGTTTACATAAGACCCAGTTGCCCATGCCCTGGCCCCTTTCCTTCCCGCTGCCTGCAGCCCTGAGGCCTTGCCCGTCGGGGC	GATAGCCTGAAGGGTACGGTTTAGATGCTTCAGGAGGAAGTCAACTTCACTGTCGGCCTATGAAGCTTTGGCTTTTTGAGACAGGGTTTCATGAAGCCCGGGCTGGGCTGGAACTTGGCCAGTTAGATGTTAGGTGGGAAACTCTCCTCTGCTTACAGAAGTGAGCACACCAGCTTTGGGGCCCTGTGCCTGAGGTAGGAGGTGCTTCCTAGGTGTCAAGTCACATGGTACCCTCTGGGAGGCAGCAACTCTCTT
ENSMUSG00000024109	Nrxn1	E029	0.00344989	0.190492					TTATTTACACACCATTGTTCCTGAACTATTCATCACACAATTAATCTTAAGTTAATTGTAATTTCATCAAATAACTAATATGATAAACTGGACTAGCTACTTGTTTGAGCACATAGTGGCCTAACAATACTTGTGTAGAATTAGTGTCAAACCTCAAGAAATACACATTTGAAGTATGAGAGTCATAGGAGATCTACCATGAACTAAAACTGATCTGTTCCCACATATATAACTGTACATACAAGCAGCTGCATC	GATGTTGTCTTGAATTGGAAAAATAGATGCATAGAGGTGTAGGCTTGCAATGTAGCTAAGGCAACATAGCTCGATTTGGTCTTGAAGGTGACAGGATCTGCGATGATGTTCCTGAATCCAAACCTGGCATTGAGTTCACAGTAATCTATATCACCATTTTTGCACAAGTCTATGTATGCCATTCCATTAAATGTCAGGCTTTGCAGGTGCCCAATGAAATTGGAGGGGACAGAAGAAAGGTAGCGTCGTTCGGTG	CTAAAAGAAAATGAAAAGACATTGCTATATTGTGCATATGAAAGACACTTCCAACTGCAGATTTTCACAGTAATAGTATATTTCAAAACATAAAAGGCAGGTAACCTACTTGATAGGTGTTACATGTAGCAAGAATATCGAGATGATACTTAAGCGTAAAGTGATCATACATAATAAAATACCCTAGACAAGTTTTAATACCCATGTAAATTTTAGATACAATAAAAATGCTCCTCGTGCCTGGTTATGTTGATT
ENSMUSG00000014592	Camta1	E004	0.00355478	-0.0491513	recognized	381	recognized	68	TTCCAAGTAACTGCATTTAAAATAAATCGATGTGTTAAGGAACCAGGCAAGGTAGGTAGAAAGGAAGTGCTTTGGGAAAGTGGCTCTAAGTGAAAGGCTGGGTGGGAGAACACTGCATGTGGAAAGTAAAATAATACTTCCAGTTCTAACTATGACCTCACTGTCAACACCTTGGATTTCAGATCAGGTTAAAGCAAAACACAGATAATATGGGGAAATTTTCTTCATTTTTAATTTACAGCAGAAAGAATATAA	ATCTTAATGTCTTTATTTCATTCACACAGTACAGCTGATTTTGAATGGGTAACAAGGATAGCAATTAAATCTTCAGGAGACAGAATAAGATTAGCTATTAATTTTATCATGAAATCCTACTCCTGGCACTTGGGAATTCAGATTATCCAAGAAAGCTGCGCCTATCACCTTATATTCAAAATTAAGAGTTACAATCAAAAAAGGTGGTCATAAATGCTTTGTGTCAGTGGAAGTATGCTTCGACCTCACCTAGAA	GTGTGTGTGTGTGTATATATGTGTGTGTGTGTGTGTGTGTATGTGTGCACGAGCGTGTGTGTTGTTGTTGCATGTCTCTGCTAAAAACAGAAATGGAAAGAGTCTGAGAAGCAATGTCACATTGCTAAGGGATGCTGCTGTATGTCTTCAAGTTCCTTGGCCTTTTTCAATTCTTTCACTCTGGAAGAGAAACAAAACACAACACCAGGTGATAACTACAGAGTGGAACTGTGACCAGATAAAAGGAGAGGGGCT
ENSMUSG00000049470	Aff4	E035	0.00363257	-0.0543985					CAGTAAATCAGTGAAGAATGTGTGATACTTAATGAATGTTTTTAATTTTCTAGAATTCTTTGCTGAACTGGACAAAGTGATGGGCCCTCTCATCTTTAATGCAAGCATCATGACAGATCTGGCTCGTTACACCCGGCAGGGACTGCATTGGCTTCGGCAGGATGCCAAGCTGATATCTTGAACTGAACATACTCTCGTTGCCTCTGATTTTTTTCCACAACACTGTGTCACATCACAAAGGAAAACTGCCATAAC	TGGAGCTTGTTTAAAGCTTAGTATTTCTGCCTATAAATTTATTCTGTTAATATTTAGCATAAACTTAATGTAGGCATTTTATTTATATATTTTGGGAGCTGTGTTACTTAATGTCTTCTAAGATAAGAGTTGGCTTGTCCAAGACAGGACTTGTTCTCTCTACAGCTACTCACCTATGTTCTTTCAAGTCTTACTACAGTTTTATTATTGTAGGATTTATGCTTGGTATTAAGGATGCTCTTCCACATGTGAAAA	TGCCTCTGCCTCTGCCTCCACCTCCCTGGTACTGGGATTAAAGGCATGTGCTACCATGCCTGGCTTTGGGGCATGGGGGGTTCTATTTCATGTTCATAAAGTTATAGACAAACTTACACATCTTCAGATGGTACACACCAGCCTAAAGAGTTCTTTGTAAAGAGCCACGACTTCTGCTCTGCCAAGACTCACTATTGTTAGCTTCTGCATTGCCTCTGTCATGAGATTCTTTGAGGAGTGGGTGCTCACCACACT
ENSMUSG00000022708+ENSMUSG00000076372+ENSMUSG00000036279	Zbtb20,Mir568	E059	0.0036961	-0.184059					AGAGATGCACACACAAACACCAAATACACTCTTCTTCCTCTGAACATTGCTTCCTTCTTCATTTCCTGTCTTTGCCTTCTCATAAAGGTGCTGCTTGCTGCTGCTGCTGAGGTGCCCGGAGTCCAGAATGCCCAGTAATCACTCAGGCACAAGCCTGGCACTGCCACGTTCAGTCCTTGGCAAGACCAAACCCTGGTTTCTCTTGCCTGGGGCTGAAAACCGTCAGATTTTTCTCATCAAAAAAAAAAAAAAAAA	GTGCACGCACACAGGTGCACATAGCATATCAAGTGTTCATTACAAATCCAGATGCTCATTTCACAAACAGCAGCAGAGGAAACAAGGTTGGACTCTTGCAGCAGATCACAAAACAATAAAAACAGCCACTTGCGGTGACGCTGGTCACTGCTGTGTGTTCATAAGGAATGGATTGTAACAAAGGAAAACAAGGAGCAGTGTTAGCAATTGAGGAAAACTGGGACAGACCATCTTGATCCAATGGGAATGCAGTAA	AAAAAAAAAAAAAAAAGCTCTTCTCTTGGTCTCCTCTCATGTTGTCCTTGTGGTGTGCCTGTCTTGGGCAGCTCTCTATGTTCCTTCGCACATGGAGGTCTATTGAGTCTGAGGTTGTCCAAATTGAGGACTATGCCCAGAAAGCCAGAGAAGTGCATCGGTCCTCTTGACACCAGAGGTAAGGAATTTAGGACCACTGATGGGAAATCACTTTGAGGATCTATAATGCAAATTTTTCATCCTGTACCTGTCTCA
ENSMUSG00000024294	Mib1	E031	0.00373639	-0.0945952					GCATGCTGCTTAAGATTTGTCTAGTTCAAAATTCAAACCTTGCTGGGTCATTTTTACACAGGGAACATCCTGGTAGCCATGTATTGCCTGGTGGATGTTTTTTGTTTATTTTGAATTCTGGACACTTTTGGGATAAAGAATAGTTAAACTTGCCACCTAGGACAAAGCTGGATGTAGCAGAGCTGGTTTGGGGGTTTGGGGTTGCAACAAATAGAAAACAAAAACAGTGAGCTCAGAGGAATGGAGCATCATGTA	GAGAACCACATATCATAAGGTTTGTCGTCCTGACTGCTTCTAAACATGCAGTTCAGAAGGGTCACTTCCTCTCCGTTTGTTGGGAAACACGCATAGAACTTTATCCTGCACCTATCAAAGGCTTCCTTCTTCCTTCCATCTGGGCAACAGGGTTCTGACTACTTAGAACACCAGCACTCAGATTGCTGACTAGAGTCATTTGTGTTTGCAAGACCCAAACCTGGGTCAACATCAGGCTCCTGAGATTTGAGGAAG	TAAAGTTTCTGTATGGAAAAATGATTCTTGCTTATTAGCTTTTGTTTAAGAAAAAAAGCTTAGTAAAAACTAAGCTTTTAAAAATAAATGCAAACATTTACCATTAATAAAATCTGTGGTGTAATATGTTTTTCTCTGACTTTTTGGAGGCTATTCTTTATAATAACATAAATGAATTTTTATTTTTAAGGCATTTGAAAACAAATCTCAATACATCCAAAAAATCCTATTATTGGAAAGAAAATTACCATATCT
ENSMUSG00000075376	Rc3h2	E002	0.00376711	-0.104235					TCAATCTGGTCTTTCCCATTTCTACACTATGAGCATCCAGGGAAAGGGCTCATTTCATTAACCTAGTCTTAAAAGACCAGGAGAGATGGGGGCTTAGGACACATCAGCTGGGTGAATAAATAAAGGTACTCTGGGGTCATTAAAAATGGTGCTGAGATTTAGGCCATCTTTAAAATTTTTTCTGAAGCCTACAGAATGACTTTGTTTTATTTATGCATCTCTCTTTATCTGTCCCAAAGACTGTAAGTTCAGTAT	AGGTGGACAAATAATTTTATTTTGTGCATGCAAATACATGTCAAGTACTGCAAACTTTTTCCATCAATTTTCTCTCAAACACTGAAAATCATGATGCTCTATTTTGTGAACAGCCAAAGCTAATATCTCTTCACTTCAGTGCTACAGCAAAAACACACAGAATTCACTCTTTGCTATTCACTATCATCACAACCCTCATTGTTCCATCTCTGCCCTCCCCCCATATACAGGCCTTATAAGTCCTAGCCTTCCCCC	TTTCAAATGTAATAAGCTCATATTTATAGAAAGGTTCTGATATAAATTATATAACAATCATGTTCCTGTAATATCCTAGGCTAATTTATAATGTCAGAAATAAGTTAATGTAACATGGTTTAAAACTCTTGTTCCTCTTCATTTCAGGTTACAGAGTAAAATAAATAAAATGTCTTTGTAGGGATGGGGAGCACTGGCCATGGCAAAAAGGTACAGTACTAACCAAATAAAACTAAGTCAAGGCTACTGTGCTGT
ENSMUSG00000031422	Morf4l2	E014	0.00382246	0.570237					ACAAAGGACATCAAAGCTGATAATGTAGAAATTCTATTTTTCTTGTAGTTTTATTTTCAGATAAATGTACTTTCTTGTATGTTTATCAATTTTGGAAAAAAATTAATTAATTTCTATTAAGGATAATGTGAAATAAATAAAATTGTAAAAGAACAGCAGTACAAACGGCTGCGAATCCTTCATCCAGCTCCAACAATTACCAACTGAAGGCCATCTTGTTTCATCTGTAACCCCACCCACTGCTCCCCCCCCCAC	ATT	TCTTTCCACAAAATAAAGCATTCTGAAAACAGAACCACATCGCCACCATAAGCATTAAAAAAATTAATAATTTGACACCGATTTCATTGAAGAATATTAATCCTGCATTTAAAAATCCCCGATACGTCTTCAAGAAAATTTTACAATTGGTGTGCTCGAATCAGGATTCAAACAAGGCCTACTCCTCGCATGTGCTTCAGGAGGTCGTTCTCAATCGCTTTCCCCCCCTACATCCTTTTTCTTTTTGACTTAATG
ENSMUSG00000032826	Ank2	E001	0.003934	-0.0451587			recognized	70	AATTTGAATATTCCTGCCTTGTCTTTGTATGAATATATTCCTTTAATTTCCTGTTCTCTGGCTGCAAAACAAAAAAGGAAATGCCAGGGTTTACTGCTGTCCCGAAAGTCTGTCTCATACTGCTGTCATTATACATAAATGGATCAAATTCCTGTGGCCTTGCCCTCTGTGTTACTGATCAGATTCCCCAGTTCCCTTCCCTCAACATCCTTAAAAGCTCCTACTTTTCATTTACTAGATAGCCTCAAAATTTAA	ACACTTAACACTTATACATTTTATTTAGTTAAATCAGCCATTGTACAACATTGCAGCTATGTATTGTTAGTGTTGTATTGTTTTCCAATAACTAATACATGCCCTCATAGATATATTCAATTAGTGTTATCACCATGGGAACAAGATGCTGATTCATCAACTGAAAATTCACTTCTCACAGTATTCAAGTTTTTGATAACACAGCAAAAAAAAAAAAAATTAAAATTGAAGGAAAAAAAAGTGAAGAACCATTAA	CTACAGGAAGCAGACGAGATTAATTAGGCTCTGTCTTCCCTGAACACCCAAGAACTTCCTGTTTCACCTTTGCATGTGTTTCTATTAGCATGTTTCTCGAGTTTCTCACAAGTGAGCTTCTCTTGTCAGAAAGGACCTGATTTTTTTTTTTTCATCTTTTAGAAACACTTCATGGGAAAGACTCTGTGTGTCCATTTTATTTTCTCAAAGAGAAGCCAGGTCATATGACTCATGTTCCGGTTGAGCTGCACGGAT
ENSMUSG00000028399	Ptprd	E002	0.00400616	-0.0561518					GTTTACAGCAGTGTCTCACTTCTTCAGAGCTGTTTTCCCAATACATAGAACAAACCTCATCTACTGTTACAATTAATACAGAGTAAACAATCCAAAGCAAAGTGTTTTCTCAACCATGTTTCTAAATGTTCAATAAACGAACACTGTGGAGCTATTTTTATGTGCAGGAAAGCTATGGTTTCTGTCAACATTAAACTGACATACACAATATATACTGAACAGTAGACCTTTCACAGGATCCGATATGGTCTATGT	CATAACACTGACATTTTTATTAGAATTCATTTGTAACAAATGGAACCTGTGTCAGCAAAGAACTGATTTTCATACAGACTTCTTTCGCCACCAATGTAACGAAGTAAGAAAATAAAAAGCACGCCTTTCATTCTGTAAAACACTTACGCGTACTACTAATTAGAGGTAATTGTATTTTTTTTAACAAGCCATTTTACAAGTTATTTTTTTTTTGAATTTTCAGTCTATGCATCCAAAACGAGAGCAAAGAACACA	TTTTTTTTTTTTGTTTGTTTTTTGTAATAGTCCCACTAAGTGGTTGTTAGCTAGAAGTTAAGAAGGACTTCTCAAGTGCCCTGTATGGCTCAGAAGAGACTCCATGGATAGCGAAGGGCCTGTAGTAAAAATCCAGAAGGGGTCAGGGGTTTCTACGTTGCATAGTGATCAAAGCTGCCCAGGTATTCTAGTGCGGCTCGATAGCAGAACTGGTATTGATCCTATAGGACACAGGGTATGGGGGAAGAAATGAAG
ENSMUSG00000040565	Btaf1	E002	0.00400616	1.06419					AGTGTTGACTCCCTCCCCGCTACTGGGATTATAGGCATGAGCCACCACCCCGAGTTCATTGTGGGTTCCCGTTCCTTCTTCTTCCTTGAGAGGAAAGATAGGCATCTCTTATACCCACAGCTTTTAAGGTTTTTCTGGTTTTTGTTTTTAATCTTTTGTTTGTTTTTGTTTCTCTGTGTAGCCCTGACTGTCAGAATTCAGAAATCCGCCTGCCTCTGCTTCCCAAGTGCTGGGACTAAAGGCCTGCGCCACCAC	CTTGATCGTCTTTTTATCTTACTGGATACTGGTACTACTCCAGTTACAAGAAAGGCTGCTGCACAGCAACTTGGAGAAGTGGTGAAGCTTCATCCTCATGAATTAAATAATTTGTTATCTAAG	GTAAGAACTCAGAGTTTTCTTAATGTAATACAAGTATAAAAACTTGTCTGTGGGCAGATTAACAATAGGAAAGGTAAAAATCGTCCTAAGTGACCTTGGGGTCTCTAAATTCCATTAAATATCTTTAGTTCTCAAAATATTTTTCAAAATTGCTATTTGTTTAAAAGATAAATCAGTTTTAGTTGTTTAAGGGATGTGTCAGATATTGAAACTTTTGCTTGTGTGACAAATTTGAGTCTGACCCAAATTGTTAAT
ENSMUSG00000022010	Tsc22d1	E027	0.00413242	-0.37546					TTGATAATGGGAGACCGGTTTATTTGTTCTCTAATTGCCCAGATTTCTTTCAACTGGTAAACATCCTACCTCTTCAGCAAAGGAAGTCCTCTAGCAGAGCCCTCATGGACGCTATCTGTCCCCGTGGCAGCACCTGCAGTGTGGAAGGCAGTGGTGAACGGACCCATGCACTATGTCTAGAAGACACAAGGATGAGCCAGCCCACCTGATCTTGTTACTTACAAACTTCCAAGATATACTCGGGTTTATTTTTGG	AGGAACCCGTCCACCATCTCTCTTGTCACCCATTGCTAAAGCGAATAAAGGGTGAACCCAAGTCTTGAAGTGTTAGCAGGTACTCTTGGCTCATCTCTGGCTGGTCCTGAGCCTTATTCTTACTGTAGTTTATGAAATGATGAAAGCCATGGAGCTGTCTTGGAGGCCCAGTGGAGCCCAGTCTGTGTTCCTAAGCAGTAAACGCCTGTTAGGGTTGAAGGGCTGACTCTGCACTGTGGGCATTGCGCCTCTTGA	TAAATGGCTTATTTTTGTTTCAGGAGTAGAAAGTGAAAATTGCAACCGTATTTTTAAGTGTATTTATGTGTCTTTTGCTAAGTGTTTCTGAATATATTGTTTTTTGATTTTTTTTTAAATTTTAGAAAAAAAATCCTGTTAAAATTCTAGAGTCAGTATAGTAAATATTAAGAGTAATTTGATCAAATTTTTGAGATTACATTGATCAAAATATAACCCCTTACAAAATAGCATACAGAAATTATTCCTCTACTT
ENSMUSG00000038056	Kmt2c	E002	0.00431999	-0.198567					GAAAACAACCAAACTCGGCAGGACAAATACTGGTAGGATGTCAGAGTATTGTACAAGAGAAGAAAAATATTCAAGAAACAAATTTCATACAGCTATTTATCAAGAGAAAAATATATACAATTGATTTATTCTGTAAGATAAAAATACATCATGCCATATACATTACAAGCTGAGAGCTGAGTCACTGAATGTACCCACAGCTCACAGTCCACTCGAATTGTGCACACAAAAACTTCATTTTATACTTAGCCTGTG	ATTTTTATGTTAAATAGAAGGCTAAGGAGTTGGGTTAGGTCCCTGCTACATGACTCTATGTTTACATGATTCTGTGAGGTTGGAAACAAAGTTCTAATCAAAACTACTTTTGCTGAAGAAAAAATTCAGCCTCCATTTGGGTTGTGTTTAAGCCGTTATTCACAGTTATCACAAATTGTAAGCACAAAAAAACCTGACTGAAGAAGTAGGGATGCAACAATATAATATGAAACATTAGTTTAAATCGCCAACAGC	GTGTTGAATCGCCTCTTCCTAGGGACGAGCCACCCGGTGAGATAGCAAGGAATGCATTCAGTTCATCCACTTCCGGCAGTTCACCGCTCCACAGTGACACGGAATCTTGTGCTGGTCATCTTCAAAGTCAAACTTATAATCATAGCAGAGCTGCCCATGGCAAACAGACAGTGTGAGACAGGGCAGTGCCCCGTTCTATCCTCTATTTCAAAACCAGCAAGCAAAACAGACACAAGCCAAAGCAACACTGAGTTT
ENSMUSG00000048279	Sacs	E017	0.00431999	-0.039905			recognized	312	TTATATAATGTGCCTAAAACCATGGCAAAATTCCACCAGCTGTTCAAGGCTTGTGGCTCAATAGAAGAGTTGACATCAGATCATATTTCCATGGTCATTCAGAAAGTTTATCTCAAAAGTGACCAGGAGTTGAGTGAAGAAGAAAGTAAACAAAATCTTCATCTCATGTTGAATATTATGAGATGGCTCTATAGCAATCAGATTCCAGCAAGCCCTAATACACCAGTTCCTATTTATCACAGCAGAAATCCTTCC	ATACCCTTCCGTGTCAGATATTTTTAAAGAGCTACTTCAAAATGCTGATGATGCAAATGCCACAGAATGCAGCTTCATGATTGATATGAGAAGGAATATGGACATACGGGAAAATCTCCTGGACCCAGGGATGGCAGCTTGTCATGGACCTGCTCTGTGGTCATTCAACAATTCTGAATTCTCAGATTCAGATTTCTTAAACATAACGAGGTTAGGAGAGTCTTTAAAAAGGGGAGAAGTTGACAAGGTTGGGAA	CATTTTTGACTGGTTATTTTTAAAACTTTTATTTTGAGATTTTATTTTTATTTTATGTGTATGGGTGTTTTGCCTGCATGTATCTGTGTACCACCTGTATGTAGTACCCTCAGAGGCTCTCAGATCCTCTGGGACTAGAATAACAAATGATTGTTAGCCACCGTGTGGATGCTGGGACCTGAATCTGAGTTCTCTGGTAGAGCAGTCAGTGCTCTTAACTGCTGAGCCATCTCTCCAGCCCTTGGGTTATTCCTG
ENSMUSG00000059824	Dbp	E005	0.0043677	-0.48704					GGTCTCCTGAAGGAAAAGGAGCGCAAGGCAACTCTGCCCTCAGCCCCCGTCCCGGGACCCGGCCTGGAAACGGCGGGCCCAGCCGATGCCCCGAGTGGGGCCGTTAGTGGCGGTGGGTCCCCTCGGGGGCGCTCAGGGCCTGTGGCTGGCCCGAGTCTTTTTGCGCCGCTGCTGTGGGAACGCACTTTGCCTTTCGGGGACGTGGAATACGTGGACCTGGACGCCTTCTTGCTGGAGCACGGGCTACCGCCGAGC	GGACTTGGGTCCCCAAATGCGAAAGGATTATTCACTGAGAGGCAGTATTCTTCTCTAAGACAAGTTTCCTCATGTTCTTGGAGCCAAGACTAGAAACTTAGAACACCTTAGTTAACTGGAGAGTACTATCTCCAGAGTCTGGGTCCAGAATTTTGGGAAACGAGATGGGACTGGACTTCAAGGACACCAAAAATGGGAGCGAGCAGGCCAGAGCGGGGTACTACGTTCCCGGATCCTACACACGCACACACCCCA	GGACTCAACCTTTTTTAGCCAGGCTCTTGAAACTTCCATCACTCCTAGGAGTGCTGGTCTAACAGGTCTAAGCTCTGAGAAAGGGTTCAGTAAGTAGGACTCGGACACAGCAGTGGGAACAAAACACTGAGTCTGAAGTTTAGAGGTTTTAGAAGATTCACGGGATATTTAAGGCCAGTCATTTCTGCCTTACAATGATAGAATTGCCTTCCGGTGGCAAAGCATCTTTGTCACAGGGTTTATGCCTGACAGGAT
ENSMUSG00000026915	Strbp	E006	0.00437379	-0.236029					AAAGGAATTTAACAGAAAAGTAGTTACTTCCTAAATCATTTTTAAGAATAGTGACTTGTGTCTGCAGAGGACTACACTTGTGCCTGAATGGGGGTGAGTACCTTAATGAAACCATTACCTTCTAGTAACATCATCAGCTTTCCAAACATGGTGAGAATGCAAGGAAGGACTTGGGTCTGCACCCTTCACAGACCAGCACAATGTTACTGGCTCCCAGTTTCTACCAGTATAATCAGGTGTCTTAAAAGTAAATGC	GTGATTGATTAATTTATTTTTTTAACTTGGAAATTCGTAAACTAAAATAATCACAATCCTCCTTCCCCATCTTTGGATGGTGCCATCATTTTAATAAGCAATGCTGGAATAACAGAATGTAACCTTATCATGGGGATGCTCTTGTACAAATGGAGTACAAAGAGCTTACAAAATGAATAGATTGAGAAATCATCTTTGCTTTGTTTTAGCAGCTTGCTTACAAATAAATGGGTTTCTAGGGCCAAGTTATTACTA	CTACAGAGAAAAGAAACGGAGAGGACTCCAATAAAAATTTCAGGTTAAAAATTCTTACAGTAATTATCATTAACCATTTCCAGATTAGTCAGTCCACTTCATACCATTTTGGAAGAGGCCCACAAATCTCTCACAAATCAATTGCTCTTCTATCTTGATACATAATGTTTTCTGCTCTAAAATAAAAAGCCTGTATTATAGAATGACACTCAGAATGACATCTGAGTGAGCAGGCATGAATTCTAAAGATGTAAA
ENSMUSG00000032875	Arhgef17	E021	0.00440993	0.310528					AGAAAGGCCAAGGTCAGAAACTAGAACAAGCTTGGAGTCGGACCCCTGAAGCCCTCTGCTGATCCCTAAAGTGAGGCTGGTCCCTAAGTCTCCCAGGTTTTGGAACAGATTTCAAGGCAAGAGCGTGTGAACTGGCCTGAAATGAGACCAGCCAAGAGTCGGGCATTGAGGCCAGAGCCTTGACTCAGTGTTATCACCTGCATCCACACTTCTAGTGCATTTCTAGCAAAGAACCATGGGAATCTAAGAAACAGG	ACTTGTGGCTTGCTACAGCACTTGCTCGCTGGGGCTGGCTCATCTGGAGTTGCCCTGGCAGCCCCAGAGGGCTTGGTCTCAGTGGAGGGCGGTGCAGAAGGAGGCAAGCAGGGTAGGTCCACAGGACCTGGGGCAGGAACGTCACCAGAGTGAAGGGTCAGCATGTACCGTTTAGTCACATCCTCAAGTGATGGTGCCTGCAAGGCGGGATGGCCTCTAACAGGAAAGCCCACAGGCTCTGGCGCAGCCACGGGG	GCTCCCTTTTGTTGCAAATAAACTTTGAGGCAGAGGAAAGGGGGCGGGGGGCGGGGCCTGGCGCCCAAAAGAGGGGGTGGGCTCCGGGAGCGCGCGAGGCTGGGAACACTGTGGGGGGAGGGAATCGGGGAGGAGCCGAAGGAGAAACAGGATGCTAGGACTTTTGTAGACCAAAACGACCCTCTAGGGGAGTCGGCTGCGAAAGCCGCGGGCTGATCCTCCCTGGGGACTCCTTCAGATACCCACAGGAGCTGA
ENSMUSG00000037652	Phc3	E004	0.00459509	-0.0680925					GGCCCTTTTAATTCACTGGTGTACAATTCCTTCTCCACAGTTTTCTGCCTTCCAAATGGCCATAACATGAGAATAAAACATACTTAGCTATACTGAACTTAATATACTCTTTGTAGATTAGATCGCAAGAAATGTATAGTCAGTCCAGCCCTCCATTAAGGTCTTTATTAGCTTTCCCTGTCTCTCAAAAGCTTAAAGAAATAAAAATTCAATAACCAGTCAGGCTTTTATTTGTAAAGAACTGAAGTTACAACT	TAAAGTTCACACACATGCTACTTAATATGAAAGTGCTTTCTCTTTTCTTAAAAAAATACAGCAAATGAACACTTTTTACACAGATAATGGTGTGCTCTTACAATGCAAAATTAACTTCATTCTCAGGTTATACACTGTAAAACTGTAGCTATGGACGCCAGGCTAGGAACTCTATGCTAAGGGTGCTAGAACTATATCATTTCCTGTGAGGAGGTCTCTAATACAACATCCAATGTAAGACACAGCTATTATAAC	GAACTTCAAAAATACTGTTTATGCTAAAACACAATCCCTTTTCACAGCCAAAGCATTTGTCTGGAAGATACGCTTTTTAAAACAGACTGGCATTTCATTGCATTCAGTTCTGTCAATGGGCTCCTAAATTATCCTATATCTCTATGACAACATTTAGAAAACTAACTGGGTAGGAAAACGTATAAGAAAAGAGAATTAAAGGAGGGGGAGTGTAAATCAATAATTATTTTTAAAAGGTTTTTTTATATTAATGAT
ENSMUSG00000040640	Erc2	E016	0.00464447	-0.0660842					TGAATGCTAATGACACAGTTGAGCATGACAGAGAAGACGGTCACAGCTGCAGCTTTAGTAGCTGTATGATATATGCCACCACATTTTGCTTATCCACTCGTTTGTTGACAGACACTTTGGGCTGTTGTGAATAATGACACTTGGAGTGCTTGTGCTTGAGTCTGGGTGAGCCCAGAGTTTTAGGTTCCTTTGCTTGTATGCATATGAATGGAACTGCCAGCTCCAACAGACACCGCATGCTTTACAGCTCTTCTA	TGTCAGAAGGGTTGGATAAAAGGATAGCTCAGCACTGCAGCAGTATCCTGATAATCTATTGCAGCCTGGCTCTCCTCACTATCCACCAGCGGCGGCCGGCCGTGGCAGCAGGTCTGAAAGGAAGGGGAGTTTTTGCCTTCACTTTCCTGCTCAATTCTGTTCTCCTCGATTGATTTGAGTGTAAGGGAAAGAAAGAGTATGAAGAAGGAGAAAATGACAACCCCTTCGTTTTCTAACAAGGATTTGGACCTTTAC	TTCATCTTACCTTTTACAAATATGCTGTATAACTGTTTCTAGCTCTTGGTGTGTGGGGGGGTGTAGGGGTTACTATTTGAAGACCATACAGGCCAAAAGAAGAAAAAGAGGAAGGGAGGGAAGAAGAAAAGCCATTGTCTTGCTTAACTGGAAAGGCCAAGATGGTCAGCTGGTCATATAGGTGCAGTTCAGGAAGTTAGATCAAGGGCCATCTCCTCCTTCCCCTTCCCTCTCCTGTTCCTGTATTTATATCTA
ENSMUSG00000082286	Pisd-ps1	E004	0.00466666	-0.788615			recognized	308	TGGCAGCCTTAGCTTGTTTAATCAACTGTGCTTTTTCAAACACCCTAGAGTGGGTGGCAGTATAGTCTCATGATGCCCACTGTGTGACAGACAACTTAGTTGCATTCAGGAAGCTGAGCTTACAGTGAAAAGGCCTCTCTGTGCCTTTGGAAAGCTGGCTGAATAGAAGACAATGACCTTGTAAAACTAGTGGGTCATACATGTTGTTCTAGCAGAGCAGGGAGGCGGCTTTCGAGCTAGGTGGAGAGCCTCCTG	GGCTCCAAGGCCTTTGGTCAGGCTGCTGCTGTACTTAGAGGTTCCTAGGAGTTGTTCCTGAGCTGCTGCCCACTCAGCCTGCCGGCAG	GTGGGAGACACTGGGAAATAAGCCCAGTAGTCAGGCAACCAGGCCCCTGTCTCACAACTTGAGTTGGTTAGAATGGAATGGGCACTGCAATGCCTGCTGGAACTCTTTGGTTCCATTGGAGAGAGAGGCAGCTTGCTGGGGAGGTGAGGGGGCAGGGTAGGGGTAGGGAGCAGGACCGGACACTGGCTGAGGGGTTGCTCCTCAGGTTCCTCCAGACTTAGGCACTGACCCAGGCCACGTGTGGACATGTGTCCT
ENSMUSG00000008763	Man1a2	E001	0.00467196	-0.0480776					TTTGAACTTAAAGATCACTACAGCGGCCTCAGCTTCCTGTTGGTAGGCAGTGGAGGGATGAAACCAGGTACTCCCACCTACACAGACTACAGCATGAAAGCAAAGCAAGTTATGAACAACTGTACCATGATTTAGCAGTTTCCTTTCTAGATACATATATACCCAAAAGAAATGAAGATGTGCCCACCCAAAAGTTTGTATGTAAAAATTCCTAAGTGTCCCAAATTGCTGTTAGAACTGCCTCACTCTTGACTA	CTTAAAGAACATCTTTATTTGATCTTCAATATACAATATTACCTTTGATTTATAAAAAAATCACATTATGGAGGACATGACTGGAAACCAGTTTAGGAGCAGCCAGTGGATAACAACAAAGGTTATACTTACCCACTTATTAGTTTAGGGAAAAATTATCAGCGAATTTGAGGCCAGTGAGAATAAAGAATGGTATTTCAACTTCTAAACCAACAATTATAATCAGGGATACTGTATTTAGTTAACCCAGTAAAA	CTGAAAAGAAAAGGACAAAACACGAGTCAATGCCGCAGGAAACCAAGTGGGCTCACTGGGGACTGCAGAGAAAACCAGTAATTGATTCTGAGCAGTTCCGATGAAGATGCAGAGCTAGACCTGATGAATAAATTTCTTAAAAAAATTCACATACCTGTGCAAAGCCTATGAAACAGTGAAGGCTGTAAGAACAGCAGAAGACACATCACTTCGTAATTTACAGACATTGTTTAAAAAAAGTACACATACTATCAT
ENSMUSG00000005045	Chd5	E048	0.00467857	-0.0834448	recognized	414			CACATGTATTCTTAGCTGTGTGTCACTGGCCCCATTGATCACTGCTCCCAGCCTAAAGCCCTGTCCTGCCTCCACTGTCCTGCATGATGGTCCATCCCATGGACAGTTGCTGCTTGTCTCATACCCACAGTCTCTGTTCAAGCTGGCGGCAGGGGGTAGGGTGGGGGCAGTGTCTGAGGGCCTGAGTGTGAGGATGGCTTTGGGAGCGGAGAAAGGGGAATTCAGAGAAGTCACTAGTCCTGACGGCTCTCGCCA	CAAGCCACCTGCCCAACCCCCGCGGGAGAGAAAAGCTACAGCCCTTTTAGGAGTTGGTGCGGTGTTGGGGTACAAAAGGGAAACCATGAAATTCTATCACACGGAGGACAGGCCCAGGCTGGCTGCGCAAGAGTCCAGAAGTGCCACCTCATCGTAGTTGAAGCCTTCTTCCACACGGCATCCCATCTACAGCTACGCCTGGCAAGGTCCTGGCGCCTTTTCCAGAGTGACTGACTTAGAGGAAATTCCATTTAC	ATGGAATCGCTGTAGTTCTTAGCCTCCGTGATTTAGGACGGGGATGCGGTGAGAGGCCGGGGAGGTGAGGGTCCTTTCCCAAACCTTCTACATTTATGATTGGTACCCACGGCTCAGGGCTTACAAGGAAGGAGGGGAAACCCCAAGTAGCAGTGTTGCTGGAGGAGATGCCCCCCCCCCAGACACGGAGTGATCCCCGTGCCCCCAAACCCACCAGCAGGAGAGCAGCAGCTGGCTGGTCCCTAAAGGCATGGC
ENSMUSG00000017631	Abr	E003	0.00467857	-0.0499798					ACATCTGTTCCTGATCTCTAGAATAAACAGTGTCCAATGGCTTCAGCTGATTAAGTCCCACACAAACCCTATTGGGTCTCCTAAAGGAGTGTAGGCTCTTGGTGGTGGTTGGAAGGTGCAGGTCTCTGACAGGCAACTTCAACAGAAGTCTGCCATAAAAGACATGCTACTTTTGAGGAAAACATAAGTAGTGGAAGGCCAGTGGGCTACCTCTGTCATCTTTTCCAGGCATACTTGTGACCAGGCCCACAGTGA	TGAGGCTTTGCAATTTTTTTATTAACATTTCCCTCTCACATGGTTTACATCAATTTATAATAATCTACATAAGTTTAAACAGAACAGAGACAAAAAAAAATATATCCATACCCACTTATTGGGGGTCCCATCCTACCTTGTCAGCAAAAGCTGGCAGCCCTCAGTCGTTGCTCAAGCAAGTACAGGCATACCTGGATTCCTGGACCCTGTCTCCTGGTGCCCTGCTGGCAGTGAGGGGGTGCTGGGCTGCAAGGC	CTACACGTCTGTGGAGAAGTACAGTGTGTTCCGCTTCAGTTCTGCGAAGGAAATGGGGGGATGCTGCAGGTAGTAGAGGAGGACCTGGACCTGTGAGGAGACAGGGAGACTGAAGTTGGGGTCCTCGCCTTCCAGACCCTCCTCCCCTGCTATGCTGAAAAGGAATGATTGCCAGGCCACAGCCAAGAGTTAACCCACGTCACTCCCCAGACTCACTCCTGCTTCTTCCCCTTTCCCTGAAGCCCAGATCGCTTT
ENSMUSG00000048000	Gigyf2	E025	0.00467857	-1.31078					TGTGAAATCAGCTTTCTACCCAGGGAGCTAGGTTTGAAACTAGTTTGTTGTTTCAGTTTACAGATGTAAATGAGAGGTGATTTTCTTAAGAGTTCAACTGTGTGCGCCATAACTGTCCATTTTATCATTGTTTCTGATACCATGCCTACATCTTTGCAGATTTGCTAGCATGGATACCTATCAGATTGAGTTGCCTTGATAAGAGCAGATTACCACTGATATGAATAGGTAACTAGGCGGTTTTGTTTTGAGGGA	TCAGTCCTGTGTGGACTCTTAGAGACCACAGGTGTTGGATGTTCAGGAACAGTCTTGTCAAAATTCTCCATCTTGACTTGATACTCACCTTTGGAACCTCGAGTCATTAGAGCTGCAAATCGGTGATGTAACATGATCTCAGAGG	GCAGGTAGGATGTCCTCCTTTGGCAGATTTCCCCAGTGCCTTCTTGCATTGCTGAGAGGAACACAACTAATTCAAAGTGTGGAGGAGTCTCATGTTGGAGCAGGGTAGCTAGAGGACTTGATGGTGAGATAGTATGGTAATAGGTTAGCGGGAAGATGAAGAATGGACATTCCTCAGAACTGATGCCATCAAGGTGGAAGTCCACACTGGTCTGGTAAAGTTCACCATTTTCTCTTTCCTGATAGAGTACAGCAG
ENSMUSG00000061911	Myt1l	E027	0.00467857	-0.0598924					ACGCTCCCAACAGCCAACCTCATGTTACATGTCACCCATATGTGTGATTTCAGATCACCACAATGGAGAGCAACCTGAAGACGATTGAGGAGGAGAACAAAGTCATTGAACAGCAGAATGAGTCGCTCTTGCACGAGTTGGCCAACCTGAGCCAGTCCCTGATCCACAGCCTCGCCAACATCCAGCTGCCTCACATGGTAAGTCACTAGGCGTAGGTGAGCGCCTCGGAGCCTCCGCAGTCCACCTCACTGAGTA	ATCCAATCAATGAACAAAATTTTGATGCTTACGTGACTACTTTGACGGAAATGTATACAAATCAAGATCGTTATCAGAGTCCAGAAAATAAAGCCCTACTGGAAAATATAAAGCAGGCTGTGAGAGGAATTCAGGTCTGAACAGCTGCTCTAGTGGTGACTCATGCTTAAAAAGGATGCCTCTTGTTTCTTGCTGCTGTAACTTACCAGAAAGTGTTATATATTTATTTCTGTCGGAACAGTGTTATGCTACAAG	TCTCTAATGGGTCTGAGTCTTCACTGGAGCGTGCCATCTGGGCTCCTGGAGCCCTCCGCCTCCCTCTCCCACCCTGGGTCTCTTGCCTTTGGAGCAGCACTGTGGGATTAGGCTGGAACTTGGGGCACGTGTGGATACGCACCCCCGGGCATCATGCTTGCTGTGCTTCCCAGAGGACCGTTTATCTCATTTACTATCACCCCTGCCCCAGCTGAGATCCAGCCGAGGACCTGAGGTTGCTTAGGTGCAGATGTC
ENSMUSG00000003153	Slc2a3	E002	0.0049	-0.073562			recognized	31	CTAACAGATGAAGTGTGCAGTGGGAATACATGCATCAGATGGGTTTTATAGGAACAAGGGCTGGAAACAAAAGGCAAACCAACCCAAAGGCAGCAAGTGCGCTGGAAGGGATCGCACTGCACTAGGAGTAGAGCAGCCTGTGCATCTCTAGGAGAGTGGTGGTCACACGGATCTGTGTAAAAGCCTGGGAAAGATACAAGAGCAACATGGAAAAAAGCCTTCTCGTGCAGGTTGTAGTTGGTCTCAAATGTGCTG	ATTCAGAAGTTTTATTTCAAAACAGAAACTACAGTAACATTAATAGAAAGTATGTATGAAGATATTCACAAGATGGCCATTGGCAAATGTAAAAACTCCACTGGAGGAACTGAAGAGGTGAAGTTAGAGGAGTCGCCTTTCCCAGCAAAGCCCCTTTCCATAGCAATCTGAGTTTTTAAATCCCAACTGGCCACAGGGAGTGGAGAGTTGAATACTGAAACCGAGCACTGAGATATGGCTCTACCACTCTATGCA	TCAGGCGTTGCCAGGGGTCTCCTTGACCGGCTGCATGCTGTTCAACTCCACACCGGCAGGGCCTTTTCCAGAGTGCGCCTGCCCCTCGAAGGCCCGGGCAATGTCCTCGAAAGTCCTGCCTTTGGTCTCCGGGACTTTGAAGAAGGTGAAGATTAGGAAGAAGATGAGGAAGGCAGCGAAGATGATAAAAACGTAGGCTCCTAAGTAGGCCTAGGAGACAGGAGAAAGAAGACTGCTCATTGCTGGTCGACTGTT
ENSMUSG00000056602	Fry	E061	0.00491767	-0.119724					AACTACATTACATTTGTTTCAAACAGCTGCTGAACATGTCCAGAGAACTGAGTGATCTGAAGAGGAACCTGAAAGAGGCCACTGCCGCCATCGCCACAGACCCACTGTACATCGAGGGGGCGTGGTCAGAACCAACCTTCACCTCCACAGAGGCGGCCATCCAGTCCATGCTGGAGTGCCTGAAGAACAATGAACTTGGCAAAGCCCTGAGGCAGATCAAAGAGTGCAGGTGGCTCCACTGTTCCTCCCAGGGGC	AGCCTGTGGCCCAACGACATCTTTGGAAGCAGTTCTGACGATGAGGTCCAGACACTCCTGAATATTTATTTCCGTCACCAGACTCTGGGACAGACGGGTACTTATGCCCTGGTGGGGTCTAACCACAGCCTGACTGAAATCTGCACCAAGCTCATGGAGCTGAACATGGAGATCCGAGACATGATCCGCAGGGCCCAGAACTACCGGGTCCTCACAGCCTTCCTCCCAGACTCCAGTGTGTCTGGCACTAGTCTC	ATGTTTGTATTTTTATATGTGACTGTAACCATGACAACCTTGGGCAGACTATGTGCTTGTATTCTGTGAATGACGCACACCGGAGTTGTGCAGTGTATGGCCCCTGGATCCAAAGAGAAGTATAATCTCCTAGGAATTGGGCGCCAAAAGAAGAACGTGATTTCCTTTATAGATAGATAAACCTGAGTGTGTGGATGTGTGCCATGTTCATGCTGTAGCCTGGGGAGGCAAGGTAAAAGCATTGCAGTTACAAGT
ENSMUSG00000002957	Ap2a2	E022	0.00497547	-0.0791151	recognized	159			TCCCGGTGCTGTCTTGCTCTGTGTCCCTCTCTGGGTGTGGTGCACAGTGCTGCTTGCTTCAGCAGGCTTCCTCTGGAGACCCCAGGCTGTGTATTCTGTTCTGAGTATGGGTTCTCACAACCCTTGGGTGGTTTGGGGAGTATAGTGGTCAGGTCACAGCGTGGTACATAGTTAACTGGAGCTGCCGAGCTGGCTGTGTGTGCCTGCAATCTCAGTACTCAGGAAGAGTGTCAGTTCAAGGCCAGCCTGGGCTAC	TGTATAGACTCACCTTGCGTACCAGCAAAGACACCGTCTCTCAGAGACTATGTGAATTGCTGTCGGAACAGTTCTAGTCCGCAGACCAGAAGATCAGGCTCTTTGTTTGTGCGTCTCTCTTGTCTCTCTCGTTTGTCTTTGTACCACACTGCAGATAAACACCCCTTGTCTGAAAACTGCCATTCACGGCACCTCCAGGCCTATGCCCACAGCCAGCCCCTGGGTGTGGAGGGAATGCAGGACTCAGTTTGAGAA	CATGTGTGTGGTTTTTGTGGGGAGTGTCCTGCATAGTCCTGAGTCCATTCCTTGAGGAATTGAGTACAGCTTAGAGCCAAGGACCCTGGCATGCTACCTGTCTCTCAATTGAGAAGTACCTCAGGAAGTGACTGTCCTGACCCCTAAGTGTGTGGCTGCAGTTCCACGGAAATCCTGTACCTGGAGGCTTTGGTCTAAGCACAGGGCCTGAGGGCTCAGGACTTCAGAGACGGCCCTTGCCTGGAGAGTATGGAA
ENSMUSG00000057335	Cep170	E001	0.00497547	-0.113888	recognized	213	recognized	242	GTGGAAGAGCAGGCAGAAATTATACTGAGAAGCAGCATGTAACAGGGTTAGAATATGGAAAGCCACACAATCAAGCTGTGAAATTCTTGCTATTGATTAATAACGGAGACATTCAAGACTCTTGAGACCCACTGAGAATGAAAAAAAGTCTAAATTGATATTTTTTAAATTGAAGATGTTCAAGATATTTAAACTTCTCCTTTGTTTCCCCGATATACTACTGTCAGAAAGCTTTTGGATGACTCAAGGCTGACT	TCATTGCATAAAGTTCCAGAAACACTTTATTTAAAAATGGAGTTGTAAATGCATAACAAAATAAAGTAATAAATGTAACAAAAATAAATAAGGAGAATGTATTCATATAAAATAAAAATAACATAGTAAAAGGCCAAATGTTTATAATTGAACAAAACTGTGTAAACAAACAATAACGTAAGTAGATAATTTAATACCTTCTTAGACTCCTTATCTTGTATTCTTCATGTAGATAGACTCAGTACCAAACGTTAA	CTAAAGGAAACAAAAAATAAAGAGAGGTAATTCTGTTTTTAGCAAGATGCAGATATGAATACTTCTTATCATTAATAGAGACTTTAGCTAAAGTAAGCTAGTAACCTCTAGTTAAGTGAGCTAGATCTAACATAACCTGGTTCAGTAACCAGTGGTTAAGTCTACATTGTAGACTATACATATCTGAGTGCTTCTCCTAGGACTCTGCAGTCCATACAGACACTTTAGGTGACTGCAAACAGTGCATGGAAGGGA
ENSMUSG00000095118+ENSMUSG00000064791+ENSMUSG00000096263+ENSMUSG00000015656	Snord14d,Snord14e,Snord14c,Hspa8	E031	0.00497547	1.40136					ATTAACCCCGATGAAGCTGTTGCCTATGGTGCAGGTAAATACATACAGCCTTTATAGTCTTTATAATCTCAACAAGTCCTGTAAGATTCGCTGTGATGATGGATTCCAAAACCATTCGTAGTTTCCACCAGAAGTACTGTGTTGGCTAGTTCCTTCCTTGGATGTCTGAGCGAATGAAACATACATATGTTGAGTAGACTGCAGTTACAGTGCGTTGTTTCTAACATTTTTTTTCTTTTTATAGCTGTCCAGGCA	CGCTGTGATGATGGATTCCAAAACCATTCGTAGTTTCCACCAGAAATGCTGTGTTGGCTAGTTCCTTCCTTGGATGTCTGAGCGA	ACTTATCTTCCCCAAATTTGAGCTTAAGCCACACGAGCAGTAGTTTCTAAAATTGGATGTCTTAATTTTTATTGTCTCTTCTAGGTGTATGAAGGTGAAAGGGCCATGACCAAGGACAACAACCTGCTTGGAAAGTTCGAGCTCACAGGCATCCCTCCAGCACCCCGTGGGGTCCCTCAGATTGAGGTTACTTTTGACATCGATGCCAATGGCATCCTCAATGTTTCTGCTGTAGATAAGAGCACAGGAAAGGAG
ENSMUSG00000078789+ENSMUSG00000038268	Dph1,Ovca2	E004	0.00500309	-0.395264					AGGGACCAGGATGTAGGAAACCTAAAAGCAGATGGAGCCAAGCAGAGCCTTGCCAAGTGTTTTCTTTCCCCAAACTCCTCAAACGTAAAACTTTCTGATTCTAAGTGACCAAGATATCTAGCTTCTTCAGTCTGGGACTTAAACTTCCACAAAAGGATGGTGACATGGCTCAGCAGGTAGAGGCATGACTTGCCAAGTCAAATGATCAGAGCTCAGAAAGAACCCACATGGTTGAATCAACTCCCCGCACTTATC	AGAACTGACAGTTGTCTTAACTAGCCATGGTGAGGAGACAGGGGAGAGCTGCTGGACAAAGTGGGAGCAGTGCGGAGACATTTGTCCATCCTTCATTCTGCAAACTGGTCCAAGAACTTAAGGTAGGCCTGACGCTGAGATGCAGCTGCTGGAATGAAGTGACCACCGGAGTGGGTGAGGGTGACGGCTCCAAGGAATCGGCTAGCCAATTGCATACTCTCCTGAGAAGGGATGACTCGATCAGTATCCCCAAAA	GCACACTGTGGACTCTTCCAGAGCAGAGAAAACATCGGCTTCCTCCTCAGAAAACCACCAGCCTCGAGGCTGCTCCTCCGGAGAACAGGGCCCTAGAAGCAGATGGGAGAAGAGCACAGGCCCAGGGTTAGAGATGGTGAGAAGAAAAAGGCAGAGCTTGGGAAAGTGCAGCCAGGGGACTTGGGGGGCGGGAGGGACCTGGAATGGCCTGGACACAGATAAAGGAGGAAACCTGGGAGCTCAGACTAGAGCCGG
ENSMUSG00000020340	Cyfip2	E002	0.00501651	-0.0673317					GCTGTCTGCACCTGGTATTTATGTGGGTTCCTGGGGATCTGAACGCTAGGCCTCATGCTTGGCTCAGCAAATGTTTTAACCACAGAAACCTCCTAAGCCCCAAATAGTTTTATTTTATTGTCTGTCTGTCTGTCTGTCTGTCTGTCTACCTGCCTACCTACCTAATTTTTGGTTTTTCGAGACAGGGTTTCTCTGTGTAGCCTTGGCTGTTCTGGGACTCACTCTGTAGACCAGACTGGCCTCGAACTCACAGGT	TTAACTGGTTTGGAAGCAGTTTTAATGGAGATGAAAATGTTTTATCGACTCAACACAGGTACCCCCAAAATACAAATCAAAATATCATCTTCAGCTGCATAGCAAATAGGATTTAAGAATTTAACATCATTATTTGATCACAAGCGTAAATATAAGTTCACCATAAATAAATGTAAATTCATTGTACAAAAAATCCCCAACAACTCTTAATACAAATATGGTACACATTTGACAATTTCTGAAACAGAATTCTTT	TTTTTGTTGTTTTTTTTTTCATTTACACTATGGAAAATCCACCATGGAGATATCATGGGAGGAACATGCGGGAGCCCAGCCCTTGGGAGTGGTAGAGATGTGTTGGGGAGGTTTTCTTTTCCTTCCAGACCTGTCCACACACTGTCAACTGGACCTGCTGCAGGCTGGTCACTGTGTTCTCTCCTCCTCCTCCTCCTCCTCCAGGTTGAAGGTCTGCACGGTTTTCTACCTAGCAGGTGGTGGCCAATGACTGGT
ENSMUSG00000038600+ENSMUSG00000063455	Atp6v0a4,D630045J12Rik	E064	0.0050286	0.173954					AACACTGAGATTTCTAACTTACAAGCTTGCAATTGCTTTTTCAAGCCTGTAGAACCATTTTAAAGCTGCTTTGTGATTGTTTTGTGAGGAAGAAAATATTTAGCCTACAGTAAACAGATAATAAGTAAATCAAGCCTCTTCTACCTTATGATAATTACTAACTAATATGCAATCCTGTGTGGTCATTTCCTAGGTGCTCTGTATTTTACACATTTAAATCTCTATAGTAGCCTAATGGAGCTAACATCACTACGG	CACATATGGCGGCTTGGCTGTGGCCAGTGCTGGTGTACCAACTGTGGCTTCAAGCGTGGAGGTGGTAGCAGGACCGAGGGAGGGTTGGGGAGGGGGTACACTGTTCCCCTGAGGGTTCTGACTCATAGGCTCGCTGTTCAGAGCAGAGTCCACAGTATCACCAGGGGCAGTGCTGGCACTGGGCATGCTCAGTTCCAGGGATGTACTTAGTTCTGGGGAAGTACTGGGCGGGAAATCTGTGGATGTCAATGATGA	AAGTACGTGGACGGCTCCACATATACAGTTGCCTGTTGCACTGTGTTCTGACATCCGGACAGCACTTCATCCGGCAAAGAAATGGTGGGAAGTGATGGGGTCGTGCCAGGCTCCAGCATTTCCTGGGGTGGCTCTGGTGGACTCGGTGTGATATACCGCATTGGGGAAACCCCCCTTGAAGAGGTCCAATGAGCATCTGGCAAAAAGTTATCCATCTCCTCATCATCGAGGGCCACCTCATTACTCGTCACGGAT
ENSMUSG00000025571	Tnrc6c	E016	0.00512277	-0.562696			recognized	389	TGACAGTTCTAGAAATTTAGTCACTCTATAGGAATGTTTCAAGGTTGTTTTTATGCTGCACTAAAATGTGTTTGAGCTCCTCTCAGCACTCCAAACTCCAGTCATTGCTGCTGATTACAGTGCTGGTCTGTTACCAAGTGTTCTTCAGCACGGGGGCCTGGGCGTCCCTCTCCAAAGACGGAGGGGACTTCTGTGAAATTTGCAGAGCCTGTCATGCTCTGTGTAAGAGGTCCCCAGAAAGAGACTGAGAGGCCT	GACAGCAGGCCAACTCTGACTTTGCTGACTGGCTCAGTTCAGGGTTTGTTGAAGTGACTGCTGTGTTTCTGAGTTTGCTGCTTCCCAGTGGTCAGCGCGTGTTCTCTCTGCCTCACTTCACGCAGCCTTCAGGGATGGAAGGCTCAGACTCTTCTCTTATCACCGTTATTTTTGAATCATTCTTAATTATCTCTTTAACTGTGACAGCCGTGTTTAGGGACACGTTAAAATGCAGTCATGTGTGTATCCTTGATT	ATCCCGAGTGGCAATCTGGGTGTGTTTGGCAATAGCGGAGCAGCACAAGCCAGGACCATGCAGCAGCCGCCAGTGCAGCCTCTTAATTCCTCCCAGCCCAGCCTCCGCGCTCAAGTGCCTCAGTTTCTATCCCCTCAGGTCCGAACAATAAGCTTTGCACACTGTACTTGGTATGGTTTTGATCTGGATCTGGCTGGATCCTGGAAATTACTGTGATAAACATGACAAGTAGTATCCTGGGTTATTTGGAATGAA
ENSMUSG00000003518	Dusp3	E001	0.00520121	-0.0727504					CCAGAACACCATGAGATGGACTTACACAGTATGCCAGCTTTCCAGAGTCGTACCTCCAAGGGCTAGGTTTTAGGAGGTTTTTAAAGGCTTCATTTTATTTTTATGTGTGTATCTGTATGTGGGTATGTGCTAAGAGCAGATGCCCATGGAGGCCAGAGGTCCTGGATCCTCTGGACCTGGAGCCACCCAGTATAGGTTCTGGGAACTAAACTCAGGTCCTACCCAAGAGCAGTGTGCACTCTTAGCTGGAACCCT	TTGTAATGTAAGACATTTATTTTGGTTACAACTTTAGAGTGCGTTAACACTGGTGGTAGACTAGAGGCTAAACTTTCCTTTTCCTCCCGGATGGCAGGACCTCCCATGCCTGGCAGGTGACAGTGCTCTGCCTCACCCCACCATCCCCTGCCCTCTGAGCCTCTTCGGTCCACTGAATCACTTTTTACGGAGTTAACCTAACGCTGGCAGAGGAAAATGGAATACAAGTTAAATATCCAGCTATTCTCTCTATGC	CCAAGAGGATTATGTTCAATCTCTGGCAAATGTGCACACATACAAGGTCCAGCGAGGTTCAAAAACCACCCTTAGAAAGTTCTTTTAAAGGCTGTTTCTTTCTTTGCTCTCTCTCTCTCCATTCTCATGGTGCCGCCAAGTCTCGTTTCTGTCCAGCGAGTCAGTTTCAGGATCCTGCACAGACACCGTGGAACCAGCAGAGCCTCCCGTAAATGGCCAGGGTGAGCAGAGGGGCCTTTCATTTTCCTTCTGTCC
ENSMUSG00000028053	Ash1l	E002	0.00525285	0.0942303					GATTTTTTGTTGTTGTTGTATTGATTTGGCTTTTTCATATGTTCTTACTGTATACCTCAGTCTACCCTTGAACTCATGTTATACCTCCTTCTGAGTCCAAACTCATAGTAGTACTCTTGGCTCAGCCTCCCAAGTATTGAGGTTATAGGCATGTACCACTATGCTCCACCTAACACTAATTTTCTTAAAAGTATTTTCCTGAGGCTAGAGAGACGGCTCAGTGTTGAAAGTGCTTGCTGCTCTCCCAGAGTACAT	ACTCTTCAAAATTGTTCAAGAAAGCAGGTGACGCTACAGCCATCGACTGCCAAGCCGAAGAAAGCATCCATCTTCATTCACAGGGGGAAAGTAATCCTTTGTCTAAGAAGCTTTCTCCAGTACATTCACAAATGGCAGATTACATTAGTGCAGCACCATCTCTTGTTGGCAGTCGAGATCCTGATATAAAGGACAGAGCATTACTTAATGGAGGAACTAGTGTAACAGAAAAGTTGGCACAGCTCATTGCTACCT	GTAAGTGGGTTATTTTGTTGTCTATTATTTGTGTTCCAATAATAAATTATTTTCCCACTGGTTTCTGGATTCTTATATTGACCTTTTAAATAAGTTTATTAATTTTTGTTTTTATAAATATATTTTGAAATCTCCAAATTTTTATTTTACTTTTATTTAAGAAATAAGGTAAGTGATATATTTGTATTAATGTCTGTCTGTGTATCTCTATCAATTATTTTTTTAGGTATCATTTAAAAAAAGTGGAAACCAAGA
ENSMUSG00000048078	Tenm4	E054	0.00550419	-0.0708389					GCTACATACTCTGTTTGTTTGTTTGTCTGTTTGTTTGAAATGAACTGAAATAATAACAGTATCTATTATAGGGATCAAGCAGGGTGTTAAATGGTAATTCTTGAGTTGAAGATCAATGAATGTTACCGTATCTATTAGCTGTGAAGTGTTTTGGACCACCAGTCCTTACACTTAGCTGCAGTATTGTCATGTGTGTCTGGGCCTATGAAACCATGAGTTCTTTGAGGGCAAAGACAATGTCCAGTTCATTCTGTA	CTATCCTCGGGGTACAGTGTGAAGTTCAGAAGCAACTCAAGGCTTTCGTTACCTTAGAACGCTTTGACCAGCTCTACGGCTCGACCATCACCAGCTGCCAACAGGCCCCTGAGACAAAGAAGTTTGCCTCCAGTGGTTCCATCTTTGGCAAGGGGGTCAAGTTTGCCTTGAAAGATGGTCGAGTGACCACTGACATCATCAGTGTGGCCAATGAGGATGGGCGGAGGATCGCAGCCATCTTGAACAATGCTCACT	GGTGTGCAGTGGCCTTTGTTGGGAGACAGTGGCAGTTACCAGGAGGGCTGGAGGAAGACCCCCATCTTAGTCCCAGAGTCCCTTGCAGGTCCTACCTGTCATGAACAGCGGTGTCTGGAGGATCACAGAAGACCAGAGGCCTCACTTACTAAAAGATGAGGTACACACAGAGGCAGCTCTCACCTTAGCTAGTGCCAAACTGCCTTAAGCTGTGTCCTAGCCTGGTTCTTATGCTCACTGGCTTCAAAGACAGAT
ENSMUSG00000013033	Lphn1	E040	0.00560673	-0.066806					GGGGTTAGTGGGACAGATGGACGGGATCCCTCCATGCTACAGTTCCTTGCTTCCTGGAGACTGGGCCTTATACCACGAGAAAGCCCAGGCCCAGGGGCTGGGGCTGGGTGGGGCGGGAGGGGGGCTGGTGGTTAATGGTGGAACTTTCTCTGAAGCTCCTTTCTCCTTTGCTATTGGTCCCTGACTCCCAAGCAAGCCTGCCCCTCAGCCCCCAGAGTGCACCCAATGACCCCCCTCCCTTGGGGTGACTCCTGA	CTCATCACTTGAAGCCACCGGGCACCTGCAGCCCAGGCCAGCCCGGACTTTCTCCGGAACAGTGCAGCGGCCAGCCCTGGCAGCCAGGACTTCCTGTATGTGTACATCCCAGCCGGGGTGGGAGCCGCCAGAGCAGCTTTTTACACTCCAGAGACAGAACAAATCTAGAAGCAACAGCAAAACAAAGAACCTGTCCTTCCCAGCACCGGTCCTTTCACCTCTGCTCTGTCCACCCTGCATCAGTCAGCCCTCCTG	GAGTGGTGTGATCAATTGGTGGACAAAAAGATGCATAGTATAATTCCCTTGGTCCCTGAGATACAACATTCTGAAGTTGGATGAGCATGGTATTACAGGCCTATAATTTCAACCTGTGGGAAGCTGAGGCAAGAAGATTATCAGTCTTGGTCAGCCTGGGCTACACAGTGAAACCCTGTCTCAACAAAATTAAGGGGATGGGGAGATGGTTCTGTGGTAAGGAACACTTGGCTCTTGCACAAGTTCCAGCTTCTT
ENSMUSG00000007617	Homer1	E024	0.00562182	0.348204	recognized	460			TTCCACAACAAGGGTGTTGTGCTTGCCCTGTAACTGCATGGCGTGAAACAGGAGCAGCGGTTTGCTATTGATGAGAGGTCAGGTGTATCATAACCAAGCCGTGGCTTTCTGAGATGGCTGAATACAAATCTCCTTAAATTGTATGAAGTTGAATGTCAGAGGCACAGCCTGATTGTCAGACTTACAGGAGGACACTAGGAATGGTAGGAATGCATTGTCGTCTGAAGGATGAACTGACATGTATGTGTGTTATAC	TGTCTTCCTAGGACTGTTTGGGCTCCGTACCAAGA	TTGCACAAAATTTTTTGAATATCATTCCTCCAGGAGGAGGGTGTTTTGAAAATTGGAATTGTATATTTCAGTATAAATTTTAGAATTTAGCTTATAGCTAGTTGGGGAAAAAAAAAGACATGAAAAACTTGAACTACAAATTACCTCCATGTATATTGGCCATAGTTAACTGGAAAGTTATAAGTAGACACTTTAATGCAATCTTTTCCCCCTGATATTAGCCAATGGGAGAATTAACAATGTCTGGGTCCCTTC
ENSMUSG00000027347	Rasgrp1	E002	0.00562182	-0.0390291	recognized	452			TGTACCACAATGTGCAATGTGTGAGTGGCTGGCATCCTCCTCTGCATGGGTCCCATCATCAAAATCTGGATAGGGAGAACAAATGGTGCCTCTGATCACTCCAAAGAGTGACCACAGATGAATTGCTGAGTGGATCGGGACACGAGACTGAACCGTCTTTCTGTCTACTTTGTCTTCTTTCCTTACTGGTTTTCTTAGCTAGAACTGTGGCATTAAGATAAGAGCCACAGGAGATGATAGCTTTGGCCCCTTTAA	GGGATCCAATGTTTTTATGATATAAATATGAGACACAGAAAACATAAAATAGGTATAAAATATCTTACAGTTTGTACAGTTCTTTCGAAGCTTTTACAGTATACATCTTTAGACAATTTCACAAGTGGTCAGTAAATGGGTGAGTCACTCCACAGAGAAGAAGAGCAGAGACATTGCTGTTCACAGACAGGATCAGTCCTTGCTTTGGCAGACACCCATCTGCCCAGACATTTCAAGACAGCCTGGTAAACAAAA	TTAAGCACTATCACCGTGGTCCATCTGGGCTAAGACATGATTGCTTTTCCCAAGCTGCAGGGATTCTATTTTCTTCTGTGCGTACTTCAGTTGGATCTTCAGAGCATCGTTATCTGCTTTCAGGGTATTTATTTCCTAAAAGGAAATGAGAATAAGGTGTGGTAATAGAGCAGCAGTGAATAGGAAATTAGTGACAGTATCAAGAGCATTATATTTGATTGGCATCTCCTGTTCCCTGTGGTTAAGAATTATAAA
ENSMUSG00000040265	Dnm3	E002	0.00562182	-0.0881109			recognized	157	TTAATAGACAGCCTGGTGCATTTCCTCTTCTATGCCTATGAGCAGGTAACACTGCTGGGTAGTGAGCAGTGTTTGTCTTCTGTTGACCTAACATGTAAATAGGCCATCCCTCCTCCTTCCTTCCTCCTCCCAGGCATTCCCACAAATTCTTCCTCTCCAGGAGCAAACTGTCCCATTGCTTCTTGGTAAAGGTCATGCCATCCTGCCGTCTGAGGTTCTAGTCCTTCAATTCATTTTTTTAAATTAGAGGCAATG	TCCTTCAAATGTAATCATTTATTTCAGGTTCAGAAATACAGTTTCACATTTTTTTCACAATAGGTACATGACCTCCAAGAATGATACAGGCTTTAGGAATTTGCTTCAAAAATCCCATTCACAGAATCCATATTAATCCAACATTAAGAAATCCCCAAAGTGGTTAAAAACGACAATGGGGAGTATTCTGGCTCATGTTAAAGAATCAACAGAGAAAACAAGATTTGACTTCTGTGTACTCAACCATTCACACAA	TTTTTTTTTTTCATTTAGTTGGGACACTGTTTTCAAAGACAATGTGCATGTCTTATACGAGTTCCATTCACGGTTTTTTTTTCAACAGGGAAAAAAATTTAGAGACATTAGAGCTCTTCTATGTCACTTAAAGGTTGAAAAATACCCCTTTGTATGTTGCATGTTCTCTAATTTTTGCCAATTAAAAGTGGGATCTAACCCATTAGAATAAGTTCAATGCAGTGGCATTTCACTTGGAAAAAAAAACTTTTTAAA
ENSMUSG00000046093	Hpcal4	E014	0.00562182	-0.0320698					TCGAGCGACCACCACCTCATTCTGTAAAAGAGACAGGTCCTCTCAAGTAGCCTGTCCTCAGATAGTCTGTCACTAGCTCCACCTCTAGCCTTGGCCTAGAACCAACATCCTTTGGGCTTAGGAGAGTTGGCTTTTGACCCCAGAGGCGAGGTTAAGGAGGGGCTGAGGACTTGCTTTGCAATCCTGTTGTTCCCAGGATTATGGTCCAAATAAACAGCATGGTCCCACAGGCCCCCAGTCAAAGGGCCAAACCGG	GACAGGATGGTGGAACACAATGGAGATGAAGGTGTGAGGTAGCTGGCACGCTGTCAGAACTAGTGTGTCCTCCAGCTGGTGCCACCCAAAGCTGCAGAAAGTCCAACTGAAAAACCTGTGGAACTTTAGGTGCCACGTGGGTGGATGTTTTAAGAAAAACAAAATTTTATGTAATATTTATTTTTTTAGTGCCCTTTCAAAGACATAAGATCATTTTATTAGACTATAAAAATATACTCTATATTACTTGATTTC	CAAGCTCTGTTCTTTGCTAAACTGGGCTGGGTGGGGTTAGGGTGGGGCAAAGGGAAAGAGGCCAGGAAACTTCACAGAGTTTCCTTGGGGATCAAGCTAGATCTTCAGTCTGGCAGTGTCTTAGTCAGGATTTCTATTCCTGCACAAACACCATGACCAAGAAGCAAGGTGGGGAGGAAAGGGTTTATTAAGCTTACACTTCCACGTTGCTGTTCATCACCAAAGGAAATCAGGGCAGGAACCCACATAGGGTGG
ENSMUSG00000071753	C230004F18Rik	E008	0.00562182	0.284784	recognized	192			GAACTCATATATACATATATGTATATATTTAAGAGAGTTATAGATCTTTATTTGTTTATTTATTTATCTATTTATTTTTACAAATTAGAAGTTGGGAAATCCAATGACATAGAACACTGTTCCAGGTGTTAACTGTTTTTTTTTTTTTTTGATGATTCTGACATTCCAGTTGTGTATTTAAAAGGAAGTACTGAAGGGGTTAATGCAAAATTTTTCTGTTCCTCAAGTATTCAGAGAGTTAAAGCTGTGTGAATT	TAAGTTAAACAGTAACAGAAGTATTTGACAGTTAAAAATCACCTGCTGTTCTCTGTTTCACCCTTTACTCCATCCCAGTTCCATCCACCCACCCACCCCCTGCCTATTGACTTCTAACCACAGTCACTGGTCTTTTCTGATTTTGGACAGAAAAAGAGGGTAAGTATCAGGTTGCTTTCTTTGCCTGCTGTTATTGCAAGGGACTCTTTTGGCTCATAGACACAGCTCCAGTCATTTCCTGACTTGCCATATTAG	AAAAGCATATAACTTCTCCTCAGAACATGTAAGTACTCTTCAGAGCAAACCTCTCTCCACAGCAAAACCGTTCCATTAAGATAAGTACTACTCCCTATGTCTGCTTCACCAACTGAACTCCTGACAGACGAAGTTCTTGTGAAACAGACTTCCCTCACATCATACCCTTGCAAGAACATGCAGCCTTACCCACAACACACATCACACACAACTCATATCATGGAAACCTTCATCACAGAAGAGACTATCCTCAGC
ENSMUSG00000074785	Plxnc1	E023	0.00574251	13.5813					GAGGGAGGCACATATTCTTCAGCTGTTCTATCTTGATGTTATTAATGATGGGGTCAATCAACTCCATAAATCAAATCAAAAAATAAGCAAGGTCAGTTTGCTTATTTTGCATAGATCCCTAACCACACACACAGTGCTGGTCATTAGTGAAGTCAGAGTATCTGGTTGGAACTGAGGTCAGCTCAGCTGTCCGTTGTACTTTCCCCAGTGAGCCACAAAGTCACCTTTACAATTCCACTTCTACTGGAACCGCAT	TGCACAGCCCCGTCAGTTCTGTTTCTCTTGCTCTCCTTGACTCTTCCTCCTCCTGAGTCCTTGGGCGACTTCTCCACAGCAACTTGACAGAGCTC	CTGCATTGGAGAACATCCCCTCAGCATGGGAGTGTGACACACAGAAAGGGGTGGGGCTGTGCGCACGCAGGCACTTGCTTCCGATAGATCTCTGTCATATTTCGAAATGTCACTTTACCTGATTCCTCTCATAGTCTGATGGTTCGCAGGGGGTGAAGGGGTGGATGCATTTCTTGTCCCGTTTACACCAAGCACAGCCGCTTCTGATACACGCCGGGCATCTGGTGACACGGAAAATAAACAACTTAATTTCTG
ENSMUSG00000023915	Tnfrsf21	E006	0.00577587	-0.0851085					GCACATAAACTCACTCATGCACAAACACATACACACATAAATGAACGCACCTACATTCATGTGCACACACACATACATAATATGCACATCATTTTAAAATAAGATTAAAATCGAATGAATCTAGTTCTAGTAGTTTCTTGTTTCATTTCAATTAAGCAGATCTGTTTTTTTTTCCCGTTGTTTCTTTTGTTTTGTTGTTGTTGTTGTTGTTTTATGTGCTAGAATCTCTTGTAGCCTAGGTTGGAAGATGATCTT	AAAGAAGGACACAGTGTTGCGGCAGGTCCGCCTGGACCCCTGTGACTTGCAGCCCATCTTTGATGACATGCTGCATATCCTGAACCCCGAGGAGCTGCGGGTGATTGAAGAGATTCCCCAGGCTGAGGACAAACTGGACCGCCTCTTCGAGATCATTGGGGTCAAGAGCCAAGAAGCCAGCCAGACCCTCTTGGACTCTGTGTACAGTCATCTTCCTGACCTATTGTAGAACACAGGGGCACTGCATTCTGGGAA	ACTTGTGTGGTTTTGGTATATTTACTACTGAACTTTCGCCTTTCCCTCTGCTCAGGTTCTAGCCCTGTTCATCTCTTGGGGAAGGATGTGTGTTCTGAAACCCTTCTCCTGTCCAATCTGTAAATCATGAATATTATTAGCAAAAGTCCCTTTTGGAGAGGTACTTGGAGGTTCACTGCACAGGGCTCTGATAAGCACTGCCAAGCCTTTCCTAGTCTTTCGGAGTTAAACCTTAGGTAACTTGATACCTGTAGG
ENSMUSG00000038084	Opa1	E045	0.00578361	-0.0994144					GGTCTGCAGTCAAGGAGCTTTCTACCAAGCCTGACAGCCTGAGTTCCATCCCCAAGACCCACAAAACGGAAGCAAAGAAGTGACTCCTGCTAGCTGTCCTCTGGCCTCCACACCCACACTGTGGCACAGGTGTACACACAAACACACACACACATAAATGATAGGAAAATGTTGGGGGAAAAAAGAAATTCTAGTATTTACATAATATATTTGATAAAATTGTGCTACTATTTTATGGCTGATAGAGATAATTTT	GTACGTGTGTTCCAGGCACTTAACCTGCAGCTGCCGTTTGAGCAGAAGAGCCCTGGACGTGGCATCCACGGTCTGTGAGCTCGTGCTGACGGCAGACATTGGGAAAACATCACTGGTGTGGCCGTGAGGCTTAGTCCTCAGAGATTAAGAAGTTGCTCTCTGAGTCGTGTTTGTGGTGGCACTGATGTGATTCACTATGGCTGGTATCACACGTACAGTGGTAGCTGCTCTGGAATAAAACTTACAGTAATTTTT	CACAGCTTTCTCCCTACACTGTGCTACCATGGCCATTGTTTCTGTTCATGATGCCAAGGTGTTCAGTCCTACCACACAGCACTACCTAGCAGGCTGGGTGGAAACTGTAAAGGTCACTTCTGTCCATCCTGATTAAAGGCTCCCATTCCCACTTTGTATTGCTGAAGCACTTTGTTCCTTCTGAGGTCCCAGTTTCAATCTTTATCCAAGATGAAGAGTGTAGATACTAAAGAGTCACTAGAACAGTTTTCTTTT
ENSMUSG00000067851	Arfgef1	E001	0.00578629	-0.137365					CAAAAATAAGACATTTTTGGTATTCTTTCTTGTTTTTTTTTTCCCTTTGGCTACATCTAATTTTTATGTTCAATTTTGCTCTGATAATAAGTTTTCTTCTGTCAACATTTGAAAATAACAATTGTGTCCTCTTCAGCCATGGGAGGAAATGGCTTAGACCAGAAAACACTGAAGTAACTTAGTTCTAGCATTTAACCTGGCCTTGTCATAAATACTAACTTCTCATTATTTAGGGACATATTTCCTGTTTTGAAA	TGGGTTACACTGCACTGATGAAATAATTCAAAAACTTTATTGACCTATAACCTGATTAGATATGCCAGATGAGAATCAATATTGTACAGAAAGTTGTACAGAATTTTTTACATAGAAAACTTTACATCTGTACCATATACATATCCACCTGAAAACATTTTCTACATCCACTGTTATATGGAATGCTTGATAAGCTTTTCATTCTAACCATCAGAGCACAGTTCACAGTATGAATACATTTCCAGTAAATCTAAC	CTGGGGGGAGAGAAACATCGTTGTTAGCACTGCTTCTGTTACACACCACAGAAACCAACCTGACATTAAAAGTGACTGCAGAGAGGCAAGTCTGCCCAAGTGGTAAGGACATGGATTATACAACTGAAAACCTACGATGAATTAAAAAAATATATATATATCTAGGACACTTGGTTCTTCATCATTGTTTTAAAAACAATTTCAATTCCACGTATGACAAAATTTAATAAATAAGCATGTTTTTCCTGCATAGAG
ENSMUSG00000068747	Sort1	E026	0.00578629	-0.0405131					AGCCCAAAGGACCTACACTAAAGAAAGCAGGATGGGGGTGGGGGACCCCGACTGACCTCACAGTTGGCTCTGAGGAGAGGGGGGAAATTTTAAATTCTTTAACATTTTTGTTTCAATTTCTGTCTTTTGTAAGACTGTGGGCTTTAGGCTTCTCTTGGTTTGTTTTGTGCATTAAGGGACATAACTTGGGACTCAAAGGGATTGTTTCGCTGACCCCGCTCTTGTGTGTTCCCTCTGGTGCCCACCCCAGGGCAT	TTAATTAGGCAATACCCTTGTTAATTGCCCGTTGGCAACTAACTTAATCATGTGCTTCCAACACACTAAATAGGGAAAACTTACAGGGCAATATTTTTAACTTGTGGCAAGAGGGAGGCAGAGAATTGACTAGCTCTGACACCTATTAAAGACAAAACTGGCTGCTTCTGAGCTCTTTCAGGCTGTACTTTGTGCTGTGCCAGTGGCTCTGCCCAGGCTCCGCCATCCCTTTACTGGAGTTCATTGGTCAGTGCA	CCTACTAAGATGAGTAAGCTACAGTTTTGTATTGTTTTGTTTTTTAGTGAGTGTTTCTAGCTTTCTGCCTTCAAAAAGCAAAATCTAGCAACGAAAGAAGCATCAACTTGAAAGTCAACACTGAGCCTTTCTAGCTTGGAGGGAGGGAGGCAGTTTATGAGGAAATGGATGCTTGTCTGTAAGTTTCTAACTTTTGTTGTCTTTTCTTTTTCTTGATCTTTATGCTGTGGAGGTCTGCCTGCCTGCCTGCCTGCC
ENSMUSG00000023050	Map3k12	E001	0.00579395	-0.101559					TTTAATTTTTTGAGATTTTTTTTTTAAAGATTTATTTATTATTATATGTAAGTACACTGTAGCTGTCTTCAGACACTCCAGAAGAGAGAGTCAGATCTTGTTACGGATGGTTGTGAGCCACCATGTGGTTGCTGGGATTTGAACTCTGGACCTTCGGAAGAGCAGTCGGGTGCTCTTACCCACTGAGCCATCTCACCAGCCCTTTTTTGAGATTTTTTACTGAGCTTGGAGCTCACTGATTTGGCTAGATTATGT	ACGTTAAAGAAAACATATTTTAATTGAAGAATGACTTCTAGTTTCCGGGATATACCCCTTCCCCTGTGGTATTTGTACATTTAGTGCACATGGTATTAAGCCAAACATCACAAATGGATGTCAGTTGGCTCTTTGTGAAGTTAAGCTTGTGGTGTGGACCTGAGACACCTCTAGTTGTGTTCAGAATGAGGCATTTTGCTGCTACCCAGTGATAATGAAATGTACACTGAATGCCTTTCTCTCAAAGCTTAATTG	GGCTCATGAATTTTTGTTTGTCATGGAAATGTAAGAGTGGATTATTAATACATTTCAGTTTAGTTCTGTAATGTCAGGAATTTTTCAAAAAAAAAAATTAAAAGATGGACTGGAGCTTTTTCTTTGTGAATAGAAACTGGATGCCACAGTGACTTACGTGGGTGTTGTTCCTGTCTGATGTTATTTTTATACCTTTTAACTTCCAGAGAGCCCTGATTCAGTTTCAATAGAATTAATGGACTTTCTTCCCTTTTT
ENSMUSG00000045210	Vcpip1	E001	0.00589529	-0.0585793			recognized	151	CTAATCTGTATAAGCTTTCAGCCCAACATAGACATCTAGGTTAATCGTCATTTGCTAAGTGTTTAAGCTATTGTCTAAACACATGGAAAACAATCACTTTAATACTTTAATAGTTATAGTGACTTATCACTGTAATGAGTTATCAGTGTGGTCTTTACTTGATTGCAGGCACTCAAGAGCACATGAAATTTGTTGTTCAGAACTCTTTCACCAGCTCCTAGAAAAGTGTGGCTTCTTACAAATACTTGTTTTGAA	TCAACTTTTCTCTGTACATTTTTAATTATTAGAAACAATCAATTATTCAGCCTTATTTTACTTACTGGGGTATGACAGCCAGTCAATAAAACTAAAACCAGTAATGAACTATCTTAAGTGGAATGTTTATCTTCTTTATTGACTGAAGTTTTGAGAGCTCTATCTTGATGGTATATGGACAATGGCATGCACACACACAGAAGACCTCAAGCTCAAGTTTGTGACTGTAGTCTCAGCATTCTGAGTTCACAGTGC	CTAAAGAAAAGGAAAGATATTTAACATGTTAAAATCTTGTTTACAATACTATCAAAAGCATAGCAAAGACATTTATGGTCAAAATAAAATTTCTGAATGCAATTGATAGATTAACAACTTTCAAAATTTATTTGCAGCTGGTCAGTGTTAGTGCATGCCTTTAATTCCAGCACAGGAGACAGACAGAAGTAGATCCTCTGAGCTGGAGGTCAGCCCTGTCTACAGAGTAAGTTCTAGGACAGCCAGGGCTACACA
ENSMUSG00000045210	Vcpip1	E003	0.00589529	0.117594					CACAAAACCTATCATACACATAAGAAAAACATAATGAAGGAAGAACCGGAAATGGAAGAGATAGGCTAGTAGGTGGGAGCTCAGTGAGACTATAAACACCAGAAACTGCAATTCATCAAACAGGAAGTCCTGAAATCACATGACAGACAGGAAAATGAAATTAAAAATAAATGAAAAATGATCAAGATGGAGCTCAGAAAGGGAGAAAAAGAAAGGGCTTTAACTATAAATACATTTTTTAAAAATAAATTTTGA	CATTAATGTAGCTAAAAGACACAAGGAGTACATTTCTTTGTCAGCTTGCTCCTGAAGTTCCTTAGATGACAGTTTACCAGTAACAGCAATCTCTTCTTGTTTCACAGTGTGGGCTGAGTGTGCAGCAGTGGATGGACCACCTTCTGCTCTTCCTTTTAAGATCTCTATTGTAATTCTGTCACCGTGCTGTAAAGGAACTGGCTCCTTTTCCATCCCTGCCTGGGGTGGCATTAACTCTTTAGGAGGAAAGCCATA	CTCACACTCACTCACTCTCGCTCTCTCCCTCAGACACAGACATACACGCCCTCACTGAGACTGCGCAGGCGTAGCTTCTGCTCTGCCCTCTGGGAACCAGAGTCTTCCGGCTCCTCTCTCGCGAAGGAGTGCTAGGCGCTTCCGTCCAGAAAGAACTTCAAATACCGTGATGCAAAGCGACTCGACGCACGCGGGGAGGAGGAAGAGGAAGGCACTCGGAAGGTGGGGGCAGAAAGGAAGTCGATGATTCGCGGA
ENSMUSG00000031144	Syp	E018	0.00596902	-0.0332881	recognized	376			CTCTCTACATAGCCCTGGCTGTTCGGGAACTCACTGTGTAGATCAGGCCGGCATCAAACTCACAGAGATCCAACTCCCTCTGCCTCCTGAGTGCTGGTATCAAAGGTGTGCACCATCATGCATGGCCTATTATCGTCTTATATTTGATAATCTACTAATATGTCATGTTCATTGTGAAACCTGTCTCCTTTCCTGATATGATGTAAACCTCACAGAGATAGGGATTTTTTTTTTCTCAATGTGGATTTTCAACAG	TCAGTGAAGCCCACGAAGACCCCACGGGTGGGCAAGAGCTCAAGAGAAGGCCTGCCCCCCTTCCCATCCCCATATCCTAGGTCTCCACCCCTCAACCCAGGAGACCCTGTCTTTGCTGTTTATATATATATATATTATATATAAATATCTATTTATCTGTCTGAGCCCTACCTTCACCCACTCCTCCATGCACTAGGGGCCCAGTCCTGAATGGGCTCCTCCCTACCCCTGACCTTGCACTCCTCAGCCCCTATC	GTCCCGGCTCTTTTTCTCAGTGCGCGTCCTTTTGGGGTGGGGGGACATGCAGAAGGCAGAGGAGGCTGGAGGAAAGGGGACTTAGAGGAAGCTCAGTTCCTGTAGCATCCTGCTGAAGCCTTGCCTACAGAGTACTCTTGAGTTCCATTCTGCCTTACAACTGTTTACTGTTCCATTGCTGGCTTCCTGGCCCACAAGGAAGTCTTCTCAAATCCTCAAGGCCTCCCCAACTAGGAGACTCCACAAGACCTCACC
ENSMUSG00000019923	Zwint	E016	0.00606532	0.274027			recognized	268	ACAGCTTTCCCAAAGCTCTCATTGGATCTTATTTTGTGAAATCAGGCCTGTTTTTCCTTCTCATAGTTTTCCCAGCACTCATGATTATGTTAGGAGAAACAAGTGCCCACTCTTAAGTGCTATGAAGTCTCTTTGAATTAATAGATGTGGTGGTGCATACTCATAATCATTATCCTTGGGAAGGCCAAGGCATGAGAACCGCTATTTAATGTTTCCCTGAGCAATAGTTAGTAATAGATATGGAGTGAGATCTTT	GTGAAAACATTGATGGGTGAAATTTGCCTTTTTGCACCGCATTTATGGATCATCTTGAAAAAGAAATGAGTGCTTCCAAACCACTCAGTGAAGGAGGAGACGAAGCAGCTTTGTAAACCGCAAAGTTAAATCCACCTACTGTACAGCTGTCCTGCAACGAGAGCATTGAGTGAGAAGACAGCAGGGAAGGAAGAACATTCCAGGGGAAGTGGCAGTTGCCATGGGGTGGTGGTGGTTATGAAAATGCATGAGTAA	GGACAAAGAAGAACACTGGTTTGGCCTGGAACACCTTTTCTACTGAGAATGAGAAGTGGCCTGATATACTTATAGCTTGACAAGTGAGATGGTTTGATGATGTCTTCAAGAGCTAAGGAGAAGGGACTGAAAGAAATTTAGTTAAGATTGAAAGCTGGTTGTGAAGCCTGTTAGCAGATCTTCAGGATGGACGTAGTGAGATGCAGCAAACCTGTTCTTTGCCTGAAGAACCTGCAACAAGACTTTGTGGCCTGG
ENSMUSG00000095118+ENSMUSG00000064791+ENSMUSG00000096263+ENSMUSG00000015656	Snord14d,Snord14e,Snord14c,Hspa8	E032	0.00616775	1.38799					TTCGCTGTGATGATGGATTCCAAAACCATTCGTAGTTTCCACCAGAAGTACTGTGTTGGCTAGTTCCTTCCTTGGATGTCTGAGCGAATGAAACATACATATGTTGAGTAGACTGCAGTTACAGTGCGTTGTTTCTAACATTTTTTTTCTTTTTATAGCTGTCCAGGCAGCCATTCTATCTGGAGACAAGTCTGAGAACGTTCAGGATTTGCTGCTCTTGGATGTCACTCCTCTTTCCCTTGGTATTGAAACTGC	CTTATCTTCCCCAAATTTGAGCTTAAGCCACACGAGCAGTAGTTTCTAAAATTGGATGTCTTAATTTTTATTGTCTCTTCTAG	GTGTATGAAGGTGAAAGGGCCATGACCAAGGACAACAACCTGCTTGGAAAGTTCGAGCTCACAGGCATCCCTCCAGCACCCCGTGGGGTCCCTCAGATTGAGGTTACTTTTGACATCGATGCCAATGGCATCCTCAATGTTTCTGCTGTAGATAAGAGCACAGGAAAGGAGAACAAGATCACCATCACCAATGACAAGGGTAAGTATGGACCTGCTGCTTTCTTTCTGAATAGAAAGAACAAGGTTTGCTCTTAC
ENSMUSG00000022197	Pdzd2	E001	0.00626379	-0.102042					AATCCTCTCTGGATGCCTCCTGGATAGCTCTCCCAGTGTTAATACAGACTGTTCTGGTTCTGGCTGAAAGTGGTAAATCCTTTTAATTGGTGTCTCCATTTTTTTTCTCCTTAATGTCAGGCAACTTGGTTTTTAGTACTCCCCAGTCCTACCATCTTGTCTTCTTTACATGTGTCGGTGTGTGGATTTACCTGTGTGCAGGTGTGTGAAGGACATGTTGATGTAGGATGTCTCCCTCACTCATTCCTTACCTTG	CTGGCCTCGAACTCAGAAATCTGCCTGCCTCTGCCTCCCCAGTGCTGGGATTAAAGGCGTGTGCCACCACCGCCCGTCGGAATGGGTATTTCTAAATGACTCTTTTGACTTCCTCCCGTGAGTTGTGTATGGGCTTGTTATTTTTTTTTTTTTTTGATGTGTTTGTCATTCTCAGGAACTTTTGGTGTCTCATTTCATCTGAGGCTCACTACCTAGGTAGGTGCGGGCTAGTCAGTGAGCCCCTCTCTACCGAGT	CTGTCAGAACAAATACAGAATGAACGAACCGTTAACGCCTCCATCTTTAAAAATGGCAACTACAAGTTTAAATGAGAAATATTTTTCAATGATGTTCCTGTATGTAGTCTTAGGATAGGGGGCTATTTTCCATTTTAGACATTCATTCTCTATACAGTTATTTTGTATTATTTAACCTAGAGCAGTCCCTCCCAATATAAACAAGTCCCAAGTCCACAATACACAAAGGGAAGACAATGTATTTACACTGAAGAA
ENSMUSG00000039159	Ube2h	E001	0.00627531	-0.0481654	recognized	294			CATTGCTCTACCTTATTCAAGGGACAGTCCCAGGTGTCTGGTGCCTGACCTGCTTCCTCTTGCCAAATTTCTGTTAACAGGCAGATATGAAGCTGTCTCGTGGAGACAGCATCACTATGCCTACTTAACAATAAACCCTTGTCTCAGGTCCTCTGACAGCTCAGGAGACTGGACGGTACTGCCACCTGCTGGCTGGTTAGTGCATGTGAGCTGTAATGGAATTGAAAGGCAGGGTTTGGTTCCTCAGGGAAGTTA	TTGCCAAGGTATATACACATTTTATTTAAAAAAGTTTACAGTTTTCATTATACACAACTATTAAGAGGTTATAGTCAGAAGAGGCAATTGTCCAGGTGACAGACATGCCCACTAGATCATCACAATGCAAGGAGGGCAGAAGGGAGGAGAGAGGGCAAGGAGGGGAAAGCGGTAAAAAGCTTAGATTTCAATTAAGGGCTGGTAAGTCCCTTTTATCTCTTCAAGTATCACACAATATGTACCAAATACAATCAG	GGTGATATATAATATATATATATCAATGCTATTATTCATAAAAACCTTGTTTAGTAATAAAAAAAATTGCTTTGTTTAAATATGAATATTAGAGTCTGCTTCTCATGGTTAGGAAATAATAGTCTTTCTGAAAAGCAGATGCCTTTTCTACTACAACTCCATGTCCTGGGCCTCATCTTCTGAGAAGTCAGACATAGAACTCTCCGATGAGCTGTCGCCAGTGCCCTCTTCCTGTTCCTTCAGGGCCTCTTCCGT
ENSMUSG00000021196	Pfkp	E001	0.00628749	-0.206531					GGATGTCAAGTTTGATCTCCCTTGCCCATGCAGACCTTCTGGTTGAAGAGCATACCCTAAAGTGACCCGAGTGTCCCTGCTCTCCTTTGAGCACAGAGGCTCCTCCCATGCAACCGTCTCCCCAGCCATACCTGTGGTTTAACTTTTAGGAATGGACCACTTCTTGTATGGCCTCTCCGATGAGATGAAGCAGGCATACCGAGAACAGCTCTTTGCTGTCAACCACGACAAACTGACCTCTGTGAGCCATAAGTG	TGTAAGAAACCAGAGGCTCTTAACAGCTGAGCCTCTGAGCTAAATTTAATGCGGATGATCACAAGAGTTACTAGTTTCTTTGTTCGGAAAATCAGTTAGCCATATAAAAACCAACCAAAGGTGTTTATTGACTGGCAAAAACTCTGAAGGAAATTCTGAGACCATGAAGAAATCATTAATCATGCATTAAATGACAGCAGTGAGCAAATTAAGCCTCTGAAACATTACTAAGCCTAGAATATGTATTTTAAATAT	AACCAAATGTTTAATCCCACAAGACATACACATGGTAAAGCACAAGACAGTATCCCATACAGTAGAAAACTGACACCTGATCAATAGCGTGAGGCTGGGTTTCATGTCTTAGGGTCTGCTGCATCAGTGGTGATGGCAAGTGGTGCTCTCTGATTATTACTGCTGACTCCGTCAACAATGCTTGCTTCCATAAAGTGCTGATAAATAACTATGTTACAAAAAAGGATGGTCCCTGGAGAACATTCCAGGTCAGGT
ENSMUSG00000052512	Nav2	E040	0.00654482	-0.0984763					GGTCCACGCACGGGACAAGGGAGGCTCGGGTGCTTTGGTACGTGGTGTGGCGCATATCCCCTGCACCATGATTGCTCCTGGCAAGCTGCTCCTCCCCCTCCCAAAGGCTGTGGCAGTGACTGAGGCCCTTATGCCTCAGATGTCAAGGCTGCTAGCGACAGCCGTGGGGATGGCATTGGTAGGGTTTTCCACTTAACTCACAGTGTGGCAAATATATTAGCTCATCCCAGACCTCCACATGACGGGCAGGAACTA	TGAACATGCTGATGAGGTTGCAGGAGGCGGCCAACTACTCCAGCCCCCAGAGCTATGACAGCGACTCCAACAGCAACAGCCACCATGACGACATCCTGGACTCGTCCTTGGAGTCCACTCTGTGATGGAGACTCCCCCACTCTCCCTCGCTCCATCCCACCCCGCATCCTCCACTTCGTTCTGAAGATGACTTCCTGAGCCAGCCCTGGCTGCCACAGCCTTGAAGCCAGAGCAGAGTAGCGGGAGCAGGAACCC	ATACTGGTGGTTTGGCTTCTCAGTTCTTATGAGACCCGGCTCATGTTGAGTTCACGCCAGGGGGACATTGTTCTACCCCAGAGGCTGTGAAGCTGAGAAACCTCAAACCTGCTTCAGATCCACCCTTGCTGGGAAGTTGTCAGGAGTACCTCTGTCCATTTCTCCTAGAAGTCACCACTGCTCACCGGAGCTTGTTGGAGCAGCAGCCACCACTCTATCACCCTTTAGGAGCCGGAGCACCATCCACGGATGCTG
ENSMUSG00000022425	Enpp2	E002	0.00695048	-0.210961	recognized	140			GTGAGCCACCGTGTGGGTGCTGGGAATTGGACTCAGGACGGCTGGAAGAGCAGTCAGTGCTCTTAACGGAGAGTCATTGCTCTAGCCCCTAGGTGGATGTTTTGAATAGAATATATGATTAATAAAGTTTTTATTCTTGTAGGTCTGGGAGTTGAACACTGTCTTGCACATGTTCCATCAACTACATCCTTAACTCCATAAAACAATTGAGGTTGAATCTACTATGGAGAATTTTGAACTGAATCAATCAAGAGA	CAGGGAAAATCTGAATGTGTGATTTATTATATTTAAGATTGGTCTATAAGGCTTAAATATGTCTGTCAAAGTTAACCGCAGATGAATGCACCTTTACAAAATCAGTCTTTCAATACAGAACAGGACTACACGTGGTGACTGGGCACTGGGAACCTAGTATTTCCTCAATGCACATATTCAACTGGCAGCACCATGTAGAAGCTTCTACTTGGATCACGAGCTTCAGTGTTCACTATAAACTCTGCTCAGAACACA	CTTTGTTTGTTTATGTCCTGGTTTCAAATTAATAAATACAAACACCATATAAAAATATACACCAGTTGCTAAGACTACACTGCCCAGGCCCAGGAAGTTAAATCTCGCTCTCATATGTATGCAGGTATGTCTTGAGGGTCAGAATTTCCGAATAGCTACGGCTAGTCTTCCGGTAGAAATCCAAACCGGTGAGATGCTCGATGTCCCTCACCCGAGCTGTGTGCATCTTCATGAGTTCCTCTACCCACTTCGACT
ENSMUSG00000057230	Aak1	E026	0.00695048	-0.0354552	recognized	182			TTCTGACCAGAGAGCTAAATGGTGGCATTTTGGTGTTGGCTGCATCTGTCAACATTATGGAACATCTCTTTTCTTCTTTGAGTCATGTGAGCATGCATAAAACACCAAAACATACCACTTATTTATTTTGAAAAGCATGTTCATATTGCAATATCCTAATAGCTAATTTTCCCTAAAGTAAGTTAATTTTTACTTAGTGAAAGAGATGGCTGTCTATTGGTAGTAGGCTAGCATGGCAGCCAGAACTTCTTGGGC	TGGGCACTCTAGGAACAGCAGTGGGAGCTCTGAGTCCAGTCTTCCCAACCTAGCCAGGTCTTTGCTGCTGGTGGATCAGCTCATAGACCTGTAGCCGTGAGCCAGGAGCAGACACAGTTCTGTAACCTTCATGCCGTAATACACATTTTCATTACGGAGTTATGAGAAAAAAATGATTTTTTTTTAAATCTGCAAATAAGGGGCCCTCAAGCTCCTTTCTCCTACCCCTTGCCTTCTCCTATAGAAATGATAAGG	CATGATGTTCAGATGTGTAAATAGCTTAAGGTAGCTTTTCTATTCCTACGAAAGGACTTGAGCACATTACTTAAAGACTGCAAATACCAGTGGACAAAAGTGTGAGCAGCTGTGCAAGATGTCCTGAGGTTCAGTGAGTTATGACTACCCTGGGGAGTGAAGCCCATCACGGTCAGGAGTGAGAGACCTACCAACACATGTTAGCCAGGACCATACTTAGGTGACAGAGTGGTACCAATTAGCAACTGCTCTCCT
ENSMUSG00000020315	Sptbn1	E009	0.00724439	-0.256411					CCCTACAATGAGGTCACTTCACTTCAGGAGACTGTTCAACTTTGCTCTAGTGAGCGCCTCCTCAGGACAAGCCTCAGGCCACTCCTGCGATTCCTGCCAGCTACATCTCCTGAGCTGAGTGTCACTCTCACTCCGATTCTCAACACACTGTACACACAAGAATGACAAGCTCTGACCTTCTGAATGCCAATCCTGCGAGACCCTGGGCCACCTTCCCACGGGTGATTTCCCTCCCCACTTTCCTCACGTGCTGCC	TAGGGACAGCAGAGGGGCCATTCAGAGAACCCGAGAGTAAGAGAGGACCACATACGCTCTGACTCGCACACGTGGCTGTGTATAAATGCCTGGCACAGATGGAGGCAGTGCAGTAAAACCAGTGCACACCCTGCAAAGCCAGCTTTGGACACCAAGGACATTAGAAGGTGGGAATGGATTAATGCCCACCCACTTGCGGGGAAATGAGAAAAGCGAAATGCCAGTATGAGTTTTACTGCACTCTACTCCTCTGAT	CCACACGGTTTTTCGGCTTTGGAAATGTAGTAGGGTCTTGATTCATTATCGTTTTCGGCCTGTGTACCATCAACTGTGTACCATTAACTGTAGCAGCCCCTGGCTGATATACCCAGGGCATGGATTAGCAAGTTACTAAAGCTGGGTGTGGCTGATGCTTTAGTAGATTACAGACAACCTGCACCCCTCATACACAGACAGACATGGAAGTATCAATGGCACAGTCATTAGCTATAGTCCCCCACCACTGCTGTC
ENSMUSG00000064329	Scn1a	E003	0.00726242	-0.070865					CATCTCACCAAGGCAACTCTGATCTCAATGTTATACAAAAATTTGTTTTCCCTCATCTTTGATTGCTCAATAAAGAGCAGATTCAGCCTATGGCTGGGCAGAGGAGATAGAAGGCTGGACTAATGATCCCAGCCAGGGGATCCCAAGTAGACAGAAGTAAAAGAAGGACCATGAGGAAAAGAAGGGGGAGGTGGCCATGAGTCAGAGGGTCCAGGAGGAGTCATAATGAGCAGGTTGCCAAGGGATTCTCCACGA	ATAAAAAATTAATTTTATTAGATTTGCACATTTTTTAATTGTGATTAGCATCATTTTGGGCTAATAGTAGCATTTTCCAACATGCAGTTCATGAATACGGTTTGCCTAAATATTTTTTTTTTAAGAAAAAGAGGTGCCTACGGTCTGCTTCTGTAAGAAACACAAATATCTTGATGTAATTGACTATATAAGTGTAATCCTCTCTGATTTTGAGGAAAAGAAATTCTGAAGCCCACATTTATATTTAGAACAATC	TTCATTTCCCTTTGGCTTTTTCATCCTTCCCTTCCTGCTCGTGTTTCTCCACGATTGGCTTTGTCACCCGATCGTAGGAGGGCGGACAAGCTGCTGTGGACATTGTCAGGTCAGTTTTCTCCGTAATAGAGTTTTCGTTTATTCTGTCAATGAGCATGTCTTCTTTTACAAGAAGATTAGCCCCACCTTTGAGTTTGTTCTTATTGTATGTGAATGAAGCTTGTTTTACTGTTCGCTTCAAAAGGTGGCGCCTAT
ENSMUSG00000020181	Nav3	E001	0.00741377	-0.107896					TCCGAAATCTGCACCAGATACCTCTCATTGCTAATTTTGCTCTACGGAAACCAACCCAAAGGTGGTCACAGAGGGTAGCACCAATGATATCTCCTAAAAGGCGCACAGAGCTTCATCTCTACCGTGACATAGACCTTAGGTTTCATAAACTTGGAACCTGTCCTCTGTGGCTGGTGTACGTCTGCCAGTGACTGGTTAGTTCTCAGGCACTGTCTTAATAGCCCGCCACGAGATATGTACGTTCAGGCAGTTACT	AATTTGTGCAAGTTTGGAGGAAAAAAAATCATTATTTACAATACCTACCCAGTAGACTGTGCAAATCTAACCTTCTTGTACAGTATAAGTACTTCCTCTTCCACAGTGACTGACCAGATCAGCGCTCCTTAATGCAGAATGTCTCGTGTATGACGATAGCACTCAAAACATGCACCAAAAACTAACTTTTGTCTTTGAAAGATAAACATGAGGGGAGGAAAGCCAAATGGTTTGTGCTCATGCCGAATCCAGTAC	CTGAAGAAAGGAAAAGAGACATCCCTGTGAGCAACCATGCATTGAGTCAGCCAGCCCCAGAACGAGCAGGGCCCTGAGCCATCTCAGTAGAACTGTGTCTGCTCATCCCATCCAAATGAAAATGCACATAACAGTTATGGGTTTTCGCTCGCCCGACCTGGCTCTTAAATTGTTTCTCTCCAGAAGAACAAAATAGGGCCGTAAGATAACTCTTTTATGTGGGGCTGTGAATGAATGCTACTTCAGCGGGGAAAC
ENSMUSG00000037646	Vps13b	E062	0.00745901	-0.174934	recognized	404			AATCCTAGCATTTATAAAAACAGAAAATGTTACAGTTCAGGAAGGTGGGGGTTTTGTTCTTTAAAAATGTTCTGCCCAAAGCCACTGGTTTGCATGACGTACTCTTCTGCCTTCTGTCAAATATTGAGGTTCTGGGAACCAGGGCAACTTTTTATTTTGGAATGCTGAGTTGCATACTGACTACATTTAAGCCAAAGAGGTATTTTCACCTTTGTTCTGGGCTCTCTGGTAAAAGGCAATGACAAATGTGCCTTA	TTGATGGTGCCCGGGAGAGGCTGTCAGAGCAACAGTTTAAGAGGCTCGTGGACTACATTGCAAAAACATCTTGTCACCTGGCCCCCAGCTGCTCTTCTATGCAGACATGTTCTGTGGTAGCTGTGGAGCCTCCTCCTGCCACTGTTAAAACATACCATTATTTGGTGGACCCACATTTTGCTCAGGTCTTCATTAGTAAATTTACCATGGTAAAGAATAAAGCCCTGAGGAAAGGCTTCTCCTGAGTCCCCTTTA	ATAAAGGTGTGCTGTGAGTTTTTTCTGTGCAGGTTTTCATGGATACCCCATTTTAATAGAATTCACTCACTGAGTCTTTCTTAAACAAGTTAAACAGAACTACTGACCAAATTTGCATTTTCATTCTGTCCACTGGATACAGCAGTCCTAGAACTCTTAACCAGGATGCACACGGCCCTGCCACAAAATCTACATTCAGACTTTAAGTGACTATCAGACATTCCTCAATACTAGTTAAGTGTTTTTCTGGATTAG
ENSMUSG00000026623	Lpgat1	E017	0.00748187	-0.0469409			recognized	54	GTTTCAGGGAACTAGAGTAGCTTATTAGGAAATAAGAGGTAGAACCAGATGTTGGCTTGCAATATTGACAAGGCTTCTTGTGGGCCCTGGGGTCTGTATGTTCTGTCATTATGTCAAGCAGCTGCCTCTCTCAGGGTGGCAGGACCTGGAGACAGCAGCTCAAAAACACTTCCCAGTCTCTTCCAGTCGTCTTCTAAGAGGGCAAAGCCAAGCAAGTTTCTGTTCATCGTAGAAACCTTTTGAAAGATTTGTCCT	AAAAGAGAAAAAGGAAAGATGTGAATTTTCCCCAGTTGTACAGGAACAGTTGACCAACACCAAATAAAAGCCCATAGTAGCTTCATCTTTAGCAAACCCCAAGCACGTACAGAAGAGAGAGACGTTACCTGAAATACCTCACTGGTACCACACCACTGCTGGTAAACTGAAGAAGGCATTTGATTTGTTAGCAGTTGTTATAAAAACCTAAGCACTTTACTCTGGTTAGCAGGGACAGTGAATAAGGGAAAGCAG	TTGGGTGGCCTTGTTCTTAACTCTTAAAGGCTGGAAAAACAGACTAGAGGTGTCTGCATGCAGTTTAGGATGCACAGATACAAACACACATGGAGATGGGGAGGAAGCTGGCTGGCCAACAGAGCTGAGTGGGCCCCTTTCATAGTCAGAGAAACAGTCTTCGGTGGGTGCAATTGAGCCAGTGTACAAGAAAGAAACTGGTAGCCAAGGAGCCAGAAGGAAGCATCTGCTCCTCTGGGACTGGAGTTACAAACA
ENSMUSG00000035901	Dennd5a	E001	0.00753651	-0.131117	recognized	355			GAAAGAAAAGAAAAATTTAGCTGGTTACTAGGGTCAAGGCTTTTCCACTGTTATACCTGACAGAGCAAACCCTTCACTAGAGAAAGGGCTTCTACACCACACACACACACACACACACACACACACACACACACACACCTGCATGTGTTAACAGAGGGCAGACAGGGCCACCTGTGTTCTATGTTCCCACCCAGTCTCCTACCGTTCTCAAGAAATGGCCCAGTATCATCGATTAAGTGACAATCTTTGTAAGCT	TTGTTTCAGGTGTTTTATTAAGTGGGCCATACTGTAGCTGGTTTCTAAGTTGCAAAACAACATAAATTGAACAGTAATAACATAGCCAGTTAGACTGACAAGCTTTCCTTCTCTTAAAGAAAAAAAGAAAAGAAAAACAAATACTTAAAACACACAATGGCAGGTTAAATAAATAAGATAGGTGAAGAAAAGACAAACCTGTTAAACATGCTCATGTTTACTCCTGTGCAACTTTGTGCCAACAGGAAACATGAT	CTGGTAGGGTGGGAGTGATCCAGGTAGGTCAAAGCAAGGGAAAAGAAAGACACAGGCCAAGGCCAAGTTGGGGGTGGGGGGATCCTTGAACTTAGTGAGAGGATGAAGAAGCTGTACCCCTCCCCCATAGCCCCAATTCCCTCTAAAGGAGCTTGCTTTCCACCACTCAGCCCTGGGAATAACCCAACACAATTATCCCTGTCACCTGCCTCTCTTTCTCCACCTCCTTCATCTCCCTAGACAACCTAGCACACA
ENSMUSG00000016494	Cd34	E003	0.00758678	0.228172	recognized	291			TGGGTCCAGAATAGGACTGATTCTCATAGTCATGCTAAGTTCAGCTGGTATAAGTAAGGATCAGTTTGGATTCAATTGATGGATGTCTCTGTTCTCTTCTAAGTGGTGGAAGATGGGTCTGGGTTCAAACCAACTAAAAGTCTTCTGTAGGATAAAATTTTCAGTTTCATAATTAGAGTGCACCTTGGCTACATTCTAGATCTTGCATGGACAATCTGATACCTGCAGGTCTCATACATCTCAGGTTAGCTACAA	GACTATGGTCAACTTTACAGTTACCTCTGGGATCCCTTCAGGCTCTGGAACTCCACACACTTTTTCACAACCACAGACTTCCCCAACTGGCATACTGCCTACTACTTCAGACAGTATTTCCACTTCAGAGATGACCTGGAAGTCCAGCCTGCCATCTATAAATGTTTCTGATTATTCGCCTAATAATAGCAGCTTTGAGATGACATCACCCACCGAGCCATATGCTTACACATCATCTTCTGCTCCGAGTGCCAT	GTGGGTGAGTTGGGCCCCAAACAGCAGATTATGCCTCACTGCTCATAAAAGCATGAGATTTAGGTATCTTGGAGTCAACATGGAATATGTATTTTATATTGCTAGAAAGGCTAGTCAGGAGGAAGATGGGGAGGAGAGGGTGAAGTCCAGTGAGAAGTCTGATCTGTGCTTTAGGTTTTGCACTTTGGGGAGATTCTTAGAGATCCTTCTAGCTCTCTAATTCTTCAGAAACACCATTTCCCTTTGGGAATATTT
ENSMUSG00000023036	Pcdhgc4	E007	0.00760023	0.153991					GTCAGAATCTACCTGTAAGCTACATATATCGCACGGCCCATAAAAGTGATAATATAAATCTCCCCAGAAATACTCATTCCTCCTTCCCCGCAGAGTCCGCCGCTTCCTCTGCCCTCCAACAGACCCAATTTGCTCTCGTTTTGCCAGTCGACGCTGTGTTGTATTCGGCTTGGATCGTTCCCCTTTCTTGCGATCAAAGATAACGATTAAAGTGTTTAATGGGCCTGGCTGGGGCGGGAGGTGGGCAGATCCGCC	GGGCGAACAAATCAGCGGCGCCCAGAAAGCCATGTCGGACTCGGCGCCCAGCGCCCAAGCGCTAACCCGCTGAAAGTTTCTCTGCCAGACCTCCGGGACCACCTGGACCCCGGCAAGAGGAGCTGCTTTTGAGTGAGATGGTCGCAGAGGCCCGGAGCAGCGGACTGGTAAGCCCCTGGAGAACGGTGGGAGTTTTGCTTCTGCTAGCTGCCTTAACCGAGGCTTCCACCATCATTCACTATGAGATCCTGGAGG	GTAAGTGTTAGCAAGTCATCTCTGAAATGCTTTAATGCTTGTGATTCCTGTACCTCCTTCACAGAGGTATGGGTCTGTTTTGTTGTTACTGTTGTTTTGAACGATAGTGATGTTTTTCTGTGCGTGCTTCTAGACTTTCACCTATCCTTCCTAGATCAAACAGTGCCTTTAGGGGGAAGTGGCTGACTAGACTGTGCTTTGTGGTCCTATGTCAAGATGGTGATACTTGCTTGACACATTTGTGAACTCAGTTCA
ENSMUSG00000032393	Dpp8	E023	0.00774111	-0.0637793	recognized	433			ATCTCGGAGAGGCATTGTTCCATATTGATAATCCAGTTAAAAACCTCTGGAAAATGTCTAGTGCATGGGAGCCAGGGCCAGGAGGATCTGGAGTTTGAGGCTATCCTTAGCTGCATGGTGAGCTTGGACTACATGAGACCCAGCCTCAGAAAGCAATATATAAGTAACTATGTTGAGAAAGTCTTGGAAGAGGGGCATCACTAAACTTCCTCTTCTTGCCTCTACTCTTTGTTGTGAAGATCTATCCTCAGGAGA	GAAATCTGCAGTTCATGGATAGTACTCTAATACCTTAACCATGCACATAAAACTGAGTGACATGTTCCCAAAGGATTGAACAGTACCTGAGGATACTGAAGGAATCAAGGCACCAGCGCCACATATTCAGACTAGCCTACTTTCACTTTACTAGCAGTATAAGCCTCTTGGACTTAATTAGTGGACTTTACAGTATACTCTGAGTTTGTTAAAATATGATGATAGTAGTGATTGGTTTGGTTCAATTCCAGGATC	ACAAAGTATTTCCCCCATGACTTATGTCTATTTTGACTGTTGAGGGTGGCATTGCTGGACTAGTTAGCCTCCTGTGGCTTCTTACGTTCTAGGTAGGCATGACATGAAGTAGCTCCAACCACCCATTTGCTTTGTACAAAGACATCTCTTATTTTATGCAGACAAATCTTAGAAAACCTCAATTATCCTAGATTCTTTCTGCCTTCTCTCCGGCTATCACAGGAGTGCATCTACAACTGCCCTTTAAATGCCTTC
ENSMUSG00000034297	Med13	E001	0.00775007	-0.0726365	recognized	440			CTGAACAAAACATTTTATACCACTGCCTACGGGACTAATGCACGGCTATTTTAATGCATGATTCATATTTTAATATTTAACTTTTTCCTTATGATTCAAACATGATTAGGTGATCATACATACACACCCAAGACACAAAGAAAAACACTATTATTATTTCAACATAACTATTTTGACTGAATAATTAACACCAAATTGTAAGACAAAAAGGAGCTTGGGTGTGTAAACACACACACATCACCAATACTGGGTGTG	AAGGCTTCATGAATAATTTATTCCATTTGAAGTTTTGTTTTTTGTTTTTTTTTTTTTTAAAAAGTATAAACTTTTTCATCTCCTCAATCACAATTTGTACAACTCAGTGTTATGGCATTCGGCGCAATAGTGTTTGTTCCTTAGTCTCTTTTAAAATTGTTTGTCATGTTAAAAAGAAAAGCAATTGGACCATATTAAATGTCACTGCTAAACAACTTAAAAACGCCCCTTCATAAAGTGACCAAGTTATTCTCA	CTGAAAGCGAATAAACTGTGTCAATCCATCTCATTCAATATACACTTGGATAGTACTTTCAAGACTCAAAGAGGTGTGTGTGTGTGTGTGTGTGTGTGTGTGAGAGAGAGAGAGAGAAAGAGAGAGAAAGAGAGAGAGAGAGAGAGAGAGAGAGAGAGAGAGAGAGAGAGAGAGAGAGACACCCTTTGCTGCCTAAACAATGAGATGACATCAATACCACAACCACAGAAACCCTCTTTGCTAAGAATTTCATAC
ENSMUSG00000020315	Sptbn1	E031	0.0079536	0.0995979					CTACCAAGGCTCTAATTTTAATCTGAGGAGAAGTTAGGTACTGGGTGACTCTGACTCATGTCCTGAATAATGTAACCTCACTTTAAAAGCTGTTTCTTGCAAAACATGGATGAGAATACTTGGTAAAGCAGATGCTGCTGTCATGACATCCATGCTACAAGGATGTGAACCTGTGCAGGAAACTCTTTTCTGACAGCAAAGCTGGGCAAGCACTGTCACCCTCACCAGAGCCACACAGGGACAGCAGGCGCTCTG	TGTGCTGGATGACTTCCAGGTCCTCCAGCTTCTCTGGGATCTGCATGTTGTTGAGCCACTGCTCCTTCTCGTCAATCCAGAGCTCACAGGCATCAGCCTCACTGAACATCTTGTACAGGGCCAGGGTGTCCTGCAGAGCCTGCTTCCTTAGCCGTGTTAACTCTGCCATCTCCTTGCAGCGCTCCTCAATTCCTGCCAGCCGGCCCTTCACATCTGGAGACTCTGCATGTGCTTGTGGAAGGGCACTGGCTTGCT	CTGTTTTAACACCAAGGAAAGAATGCTAAGTCTCCAATAGCTCCCTGTTCATTTGCAGACAGTAAACTATGTTCCATGTTCTAGCTTGGCTCCCGTCTAAGCAGTGTCATATAAAGAGCAACAGTCACTTCCTGCCATACTGACTAGGACAGGAAGAAAGGGCTATGACGAACACTGCACTTTTGGCCCAACTGTAGACAAAGAGATCACTTACAAATCAAGAAAGCACACGTATCATATGGAAGCAGCTGTGTT
ENSMUSG00000022425	Enpp2	E003	0.0079536	-0.146907					CCATCATCTAGTCAAATATCAAGGAAGCAGCTGGGAAGAGGACCCAATGCAAGAGAATCGGGGCCCTCTTGCGCATGCACACACCTGAGGGAAAGCTCCAGATCTGCAAAAGAAACAAAGGCCAGACAGAACCAGGGAAAATCTGAATGTGTGATTTATTATATTTAAGATTGGTCTATAAGGCTTAAATATGTCTGTCAAAGTTAACCGCAGATGAATGCACCTTTACAAAATCAGTCTTTCAATACAGAACAG	TTTGTTTGTTTATGTCCTGGTTTCAAATTAATAAATACAAACACCATATAAAAATATACACCAGTTGCTAAGACTACACTGCCCAGGCCCAGGAAG	TTAAATCTCGCTCTCATATGTATGCAGGTATGTCTTGAGGGTCAGAATTTCCGAATAGCTACGGCTAGTCTTCCGGTAGAAATCCAAACCGGTGAGATGCTCGATGTCCCTCACCCGAGCTGTGTGCATCTTCATGAGTTCCTCTACCCACTTCGACTCATCCTCGGAACTCTGCAAGGGAAGGGAAGCAATCAGGTTTTTCTAGACAAGGTTAGACTAGGTCATTTTCTGCACACACACCCAAGCATATTGTTC
ENSMUSG00000034751	Mast4	E002	0.00801749	-0.141572			recognized	22	CAGTGGGACATGGGTCACATGAGTGATGCTGGGAAATGGCGAACACTGTGTCCCTCAAACCAGTGTGTACTGTATATAGAAGCCACACCCTGGTATTGAGAGTGACAGGGGGGTCTAAAACCTATCAAGTACATATGCTTCTTTGGCCAGTAAAGAAGGAAGCAAGGAAAGGGGGTTTCTGAAACTGGGAGGTAATCTTTAGATTGGGATCTTAAAGAACATGGGGAGTCATAGGAGCCGAGACCTCTCTGCTGG	ATGCTAAATTTTTATTCAATGTTATGCAACTGCATAAGTATAAATATTTGTTCAATATACAACAATTATGACATTCATGGGGGGGTAGTTCTCAGAGAAAATAAGACTGCAAACACTTTATTGCACAGATCCTAACAAACTGAAGCTGGTAAGTCTACAGCTGGGAGCGCTACCGAGGGGCACATCTTACAACCACACAGAGACTGACCAAAGGGAACACGGGAGAAATCCTACCAGCTGGTTGGGGGGAGATTT	CTCCTTATGAGCCTCTGGGCTCTGCATGGAGGACATTCCCATACAGTGCTGGTTTGTAAGGTGACAAAGACCCAGTCCCAGCTACGCTTGGGCTGGGTCTCATAGCCATGCCACCAGAGCTGCCTGTTAGGAGGCCTTTTTGTGAGGACTGCTCCTTAAGGTCTCCTTGCCCCTTCTCTGCCGAACCACGAAGTCTTTCTCTGAGGAAAGAGGGAGGGAGCGATCTGTGCTTGGGGCTGGGGGTGCTCTGGTCGC
ENSMUSG00000028514	Usp24	E076	0.00849931	-0.123914	recognized	164			TGTGTGCTGCTTGACTTGACCTCACAGACCTCACTTCACAGTGTTGGCTTTTAGTTTATCAGACATGCTTGTTCCTTCCACGGGGGAATGTCTCTTCTTCTCCTCATTCCTACCTCAAGTGGGAGTAGTCCCAAGACATGGGCTGGGTCTTCAAAACCAATTATTAAACATATAAACCAAATCCAGCCCACTCGGTTACAGAAGGAATGACCTAACGGGTAAGGAGTCACTGTGTGGTGCGGAGAAGGAAGTGCA	GTTCGGAATCTCCCATGATGATTGGTGAATTAAGAAGTGACCTTGATGATGTTGATCCTTAGAGCAGTGTGCCCAGACAGGATGCTCAGCACCTTTTGGGAAACCAGAATCTCATCATTGAAGGCCTTAAATAAGCCTTGAGTGGGAGCCAGGAGTGGGAGGAGAACCGCGTGCTCCAGAGGAGAGACTTCTCTGGCCACTAGAAGGCTGGGAGCTGTTGGGAGAATTCTGCAATGTGGACCAGCTGTCCCAGCG	AAAAATGTAGAATTGGAGTCTCACAGACTTTTTCTCCAGATGTTAGTCTGGGTCTGTGGGGGACACTGGGGAGCAGCATAGACACACCTGGTCCCTTCCTGGTGAACTTGCACTGACAGTGGGCGGGGGTCACAGTGTGGTCGGGCTGTGTGGCCTCCCAGCCTTCTCTGATCTAGGATCTCTGTCTGTGTACCATGTGGTCAGGGCCAGCGATCTTGGGCTCAGGGCCTGTAGACTCAGCTTTCAGAAACTAAG
ENSMUSG00000032253	Phip	E028	0.00878349	1.10118					AATGACTTCATCCTTTTGCGGGGCCTTACTTAATAGGGTGCTTCACAAATAACATGCATAAAAGGTTGGGACAGAATCCCAGCATTTTAAAAAAAACTAGGGGTGGGGTCACATGCCTACAATTCCAACATGAGAAGGTGAAGGAATGGAGACCAAAGACATTTTTCACTAAAAGTAAGTTCAAACCAACCCAGTAAGTCTCAACAGCAAAATCAAAAACCATGGGAGAAAAAGCATGGAATACAATAAGATACT	CTGCTGGACGAGTAGCCATATCTAACAAAATGCTTTTCCATTCCCTTCGTTTAAACTGCCAAATTCGTGCTGTCCCATCACGACTACCACTCACAAAC	CTGTTTAAAAAAAAAAACAAAAGACAAAAAAGGTGGGGGAAGATCAGAGACTCTATCAAAATGTACTTTTCCCAAATTTCTCTTTTTAAAGAACATCTTTATTTACAACGTATTCTAATACAGCAGAAATAGTTCCCTAAGTCTCTATAAATCTAAGAACTCCTAAAACTTTATGAGTTTGTAAGACCATTTTAATAGGTCATGAATAGGCTGATAAAAATAACTCTCAAAATGCCTGAAGTTCACTTGACAAAC
ENSMUSG00000040687	Madd	E002	0.00878349	-0.141863					ACCTTCTCTGACTTCCTCCCAAGAGACCACATTTCCTTACAAATCTTGTGGCCGGCAGGTCTCAGAAGTGTCATGGCAGTGTGCTGGGTATTCTGCCCACAGGTGCCAGGGTTTCCCATGGCATAGATAGCCCATGAGGGTTGGACATGGGTTACCACTTTATTTTTTACAGAACCCTGGTCCGAAGGCCCTTGGGAGGCCCAGGTCACCACAGCACATCTGAACACACGTGTACAGGGTCACAGAGCAGTACCC	GAGTTCAGGACATTTATTTCACATCACACAGCTGTACATTTTTCTATAAATAATGTGGAGCTGAAATATTTACATTCTCCTCCTATCCAGTCCATAGCTTTCTTCTGGCACTGAAGCCAGGAGACTCTGCCTGCAGACAGGCGTGCACTCTGGGCTCAGCTCAGCCCTGACCCACCTATCCCCGGCCCTTAGGCAGAGCAGCTGGTGCTGTCTGGGACACCATCACCTCATTCCTCCGTCCTCTCATGCCAAAGG	CTGCGGCCACATACGAGAAGAGACACAACACAGAGTAGCAGATCTCGTGGGCCTGCAGGGAACAGAAGACCCGTTGGATCAGCCACACTGAGACTCCTTCTTAGGTAGAGGGTCAGCCTAGAGTACGAGGCCTGCCCTGACACTAGTGCAGGCCCCTGGGCTGAGTGAGCCTCAGGCAAGTCTCTGGAAGCCTTTCTCCTGAGAGAGGGGGGTCAGCACATGTACCCCAGATGAAAGGTGTGTTTGACTTGAGTT
ENSMUSG00000013698	Pea15a	E001	0.00895838	-0.0530636					AGGCCAGATGCCAGCTCCTGGGCTTCCTTCGTGGCAGGGAGTGTGTGGTAACTGAGTAGTAGTCTTATGTCCTCACTGCTAGAGGGATGATGAGGTGGGCTTAAAACCATGCACTCTGGAATTTGTTGTATTTTTTTCTCAGTAAAGCTTTTCCCCTGACTGCTGCTTTGTGTGGTATGTGGTCCATTTATTGTGATAGAGGACATAGTGTACAGTGTATTCCTTCCAGATACATGCTTGATTTTGCTCATACTT	ACGGTAGAGTCAGTCACCTTTATTCCAGGGTTAGAACAAGGCTGTGCACGCTGCAGACAGAGGAGCACAGGCTAGGAGCAACCTCACAGCAGCACGAGGGGGTGAGTATATTAGGGCAGGTTAGTCTGTTTAAAGTTTGGTTTTTGCCTTACAGAGAAGCTTCTGAGAAGCACCCTGTCTCCTCCCTCTTCCATAAGGGAAGCGCCGTCTCACTCCTGCTCCCATGGAACACCCCAGAAGGAAGGATGTTACCCA	TCCAATCCCCTCATGAGGAGGAGGAACTAGATGAGCTAGACAGACAGACAGCCAGAGCGTGCGCACACGCACACACACGCGCATAGTAAGGGTTAGGACCAAGTTAGTAAATGGGTACGGAGCAGGGGGTTGCCCTAGCCCCTCCCATTGAGGATGGGGAAGGGAGTGGTCTGATGAAGATCCAACCTTCCTCCTCTTCCTCCCCCTTGTTCAGGCCTTCTTTGGTGGGGGAGCCAATTTGATGATTTCTTCTTC
ENSMUSG00000015222	Map2	E036	0.00906074	0.304682					TGAATGATCAATATAATATCTATTTCTAGACCTAGCAGAACACTCAAAGATTGTTGTTTTTAATTAGACAATTCTAATCCAAATCATAATGCTTGCCTGGATGTATTTTAATGTGGTATCTCGGGGCTAAATGAAACACATTATTAATTTTATAACTACAACTTGGGACAGAATTTGTTTTCATGTGTATCTAATTCATTCTTATGGAGAAAATGGCTTTAAAAGTACAGAGTGTTTGTCTTCTAAGTTGTTAAC	ACTCTAGTCCACAGCCAGGGATGCTGGTGCCAGGTAAAAATGCAGACCAAGCTGATACTGCTTCAGATAATCAAGAAAATAAACATGTGACTGAAAACAGAATCTCTTTTCTACATAAAAAATTAGATTAGAAATATGGTGAATATTAAGTAAATGGGAACATCGAGTGTGTGAAGAAAACCTTGTGTCCAAGTTGCTAGAATAAGTATGAGAAGTTAACTTAATGTGGAGATGTTGGACAGACATGATACAATC	AAAAAAAGAATTTTTTAAAAAATTGCCTAACCAAAGGGAAAGCTTACACTGAAATAATTTGATGTTCACTTTACAAGTATCCCTGTATTGTAATTAATGTAATATCAGTATTCCTAGAATATGTGCCTATTGGGGGATACATTGAGAAGAGATTTTATTGACAGAAGAATTTGACAAGTATCTCACCTAGGAAGAAGACCATGGTGCTGCTATTTAGGGCTCTATTAGTTAGAATGTCTTCTCACTAACTGTCTT
ENSMUSG00000021936	Mapk8	E001	0.00913233	-0.0747422					GCAGGGGAGGATGGCATGGGTACAAAGGCTGTGTGGACAGAAGCCAGGCAAGATGGAAGAACGCCATCCCATGGGCTGGGTTAGCACTTAGAGGGACCCTGCACACCTTCATGCAGCTCACCCATTAGCAGTGATGAGAACCTGTGGACAGAGCAGATACAACTGGCTCCATGTTCAAACCTGCTTCTTTTTTTTGACAGATTCGGGTCTGATACTGATTTTTGCCAATTGGCCATGATGGCTGCTGTCTCATGC	TTCATACCACTTTTTCTTTTTTATTTAAAATATTATAACCAATTGACACACTAGATAACACTGTTTACACCCAGTGGTGCATGTTGAATGACTAGGGCATGAACGATAACCCACGGTAACGATCCCAGCATTCCCTACAAAGTGCCCATTTGTTTTGTCTAGAGGAGAAGAGAGGAGAGCACACGGAAGGGGCGGGATGAAGGAATGACATGTACAGGGAAAGAGGAAAAAATCTAATTATCATCCTATGTTTTG	AGATGAACGGCATATTGCTCATTTAAATGTCACCTACACAAGTTTAAGTAGGCTTTGGAACCTCCTGACAGCTAGTAGAAACAGGATAATGCTACAGGTAGAATCAAATGGCCAGAAACACCACAAACTGGTGCTCAACAGACTGACCCGCTAAGGAACAGGAACTGGGAAAGGCCAGAGGCCAGAAGCTGTCCAACAGGGAAAGTCCAGGCTCGTGGCCAATGCCAGGACCTACAGCCTGAGGAGATTAACTCA
ENSMUSG00000020457+ENSMUSG00000023764	Drg1,Sfi1	E010	0.00927707	-0.740222	recognized	203			ACCAGAGTTCATGTCGATCTTGGGAATGCCATGAATTTCCCCTGCAGAAGAAATCACTTAACTTTTCAACCCTATCAGTAGTACCGTATTTTGTATGAAAAGTAGGAGACTTCTGAACAGTAATTCATTTCATTGCAAGACATTTTGAAATTAAAAAACAAAACAAAACAAAAACTACCATAGCTTTGAATTTTGTTGTTGAGGGTGTCCCAGGCCTTGTGAAGGATAGCACCTATCCCCCAGGGACGGGCCACT	TCCTGGCTTAGCTCCAGCCACCTACGCAGGCTGTTGGCTTGTCGCTGGCATGAC	CTGGAGATGGGGACACCTATCAGGCTGGGTTCTTGGCACAGCCCCAAGTGAGCCCTTTGAAGAGATATATTGGCTAATAAAGTGCTTCGAGAGAATGGCCAACAATCTTCTGTCTTCCCCAGCAAACAGCAACTCATGTGAGCCGTGTGAAAACTTCTCTTCCTGTCCCTTTCTAGAGGGACCAGTCTTTTTCACTGAGGTCTCTGAAAGCTGCTGTATGTCAACTGTCCCCAGAACACTGGGTATAAGTAGGAC
ENSMUSG00000027340	Slc23a2	E001	0.00934668	-0.0642845					CAGGTTTATGGCACCAGATTAGAACCGCTGAGGTGCCACACCTTGTGGTCAGAGACTACTGGGTTGTTTTCCTCTCCAGTGAGCTGTGACTCTTAACTACTGTGCCATCCAGCCTCAAGGACAGAGCAACTAACGTAAGCTGATTTAATAAATTCACACACATATATAGTTTATATGTATATTAACTGTTGTATATGTAATAAATTAATATATGCTTTTTCCCCCAATCTCATTGGCTTTTTAAAAAAAATTACT	ACATCCAGGAGAGCTTTTATTTGTACGGAACAGTTTTAAAAATACAGAATAAAATAGCTTTCTCTACTGTTATTCACAACATCTGGTCCAAATATTACATAGTTTTAAAATACTTAAACGTTTAATGAAGCCATGTTAGAAAAAACAATATGAAAATTCTTTTTAAAAACTCCATAAAAGAATTACACATCTCAAAAAACAACCCCACCCCAAATACCCTCAGTATGCAAAATAAAAATTAAACACAAACAAAAC	TAAGCCACACCAAGTCTTATTAAGCCAGATCTGGCAGCAATGACTTGAAACAGAAGGAAGGAAGGAATGACTTTAGCTAGATAATGGCACATCCTATGTGGTGACGCTCTGTTACCATCCCAGCTTCCCTTCTTCACCAAACAAATTCACATGTAACTTGACCCACATTTCTGGGCCCTGGTCCAGTAGTCAGTTGTGATAAATAGATTAGACATTACAGTATTTACACTTTCATGGTAGAGAGCAGTACAAAGC
ENSMUSG00000007880	Arid1a	E001	0.00943613	-0.175133					CTTCTTAAGTGCTGGGATTAAAGGAGTGTGCTGCTATGCCCAGCATCTATTCCTTTTAAAAGATTATTTTATTGAGGCAGGACTTTGGCTAGCCTGGCTAAAAATTTTGTTTAGTTTTATGTTTGTGCACTGTCTTGTGTACATGGAGCCACCGGGGTCAGATCATGCTCCATCTGGGGGTGCTGGAGCATCCCTGGAGCTGGAGTTAAGACAGATGGCTATAAGCCACAGAGTGAGGGCTAAGCCTGCGGACCT	TACCAAGATTTAATGTACATTTATTCTTAACACGTGGAACATATAGTATAAAGATTTCATACTGAATAAATGATATTCATTAAGCCAAAAAAGGAAAAAAAAGGAGGAATTTACATCAAGTTTTTAGCTACATTGTTGAAATACAAATATGCAGATTTTATCACTGAAAAAATCTCAATTGTGTTTCTTCATCAGGAACTTCAACTGAACCTAGAACTTTTTCACACCTCGATTAGAAATGAAACAAAACAAAAC	TTTTTTTTTTTTTTTTTTTAACCATTAAAAACAGTTATGAAATGTGGCATCCCGTTGATGCAAGGACTGGGAAAGCCATTTTTTTCCCCAAACTCACTGTAAACAACAGTAACTTTGGTTAAAATAAAAAAGTCTTCTATGTAGGCAGAGCTTTGTCTTTTCAAATAGGGTGGGGTCCTGAGGGAAGCAGGTGAGGATGGGGAACAGAAAGGTGTGAGGGAGTGAGGGTGGGGAGGAGAGAGAACAGGAGAGGCT
ENSMUSG00000039219	Arid4b	E043	0.00948507	-0.397995					GTGATCGTGTAGATATTATGACCCAGTTACCTTCATGTTCACAGTGTCTACATCTATGATTTGTGTTTTTGTTATAATGAAGTGGATTGCTTCATAATTTTTCAGAACAGCAGGCAAAGATAGTGTCATAGGCACAGTTCCAGTCTGTGACATTACATCTGCCTCCAAACCATACTACTTGACAGCAATCACCTATCTATCTCAGACTGGCAGGGACTATTCATTGGCCTGCAGAGACTATAATGCTTTGCTGCT	TGAATATGGCATCCTTCGGGGCCCCGGGTGGCTGTGCTCAGCAAGGCCGTGTCAGGCAGGCTGAGGCAGGCCACAGCACATAAAGGGGCCAAGCCTTGGGTGGCTTAGTTAGGAGTTGCTATGGTTTCAGAGCGGCAGTGAGGACTGGAGAATTCAGTAAGACGTGTGTTTAGGACGCAGACGTTATTTACTTCAGGGGAGGAGGTGCACCTTTACAGTTTTGATCACTTTTGATACTTTCAGAGCCCCTACTTG	CAAACAGTAGTGACAGTGAAGAACTCTCAGCTGGTGAAAGTGTGACTAAGACTCAGACAATCAAGTCAGTCCCCACCGGAATGAAGACCCACAACAGCAAGTCTCCAGCAAGGGTACAGTCTCCAGGAAAAGGTGGCAGGAATGGGGATAAAGACCCTGATCTCAAGGAGCCTAGTAACCGGCTTCCCAAGGTTTACAAGTGGAGTTTTCAGACGTGTAAGTGACATATGTAGTTTAGATGTAGGAGTTTTGTCT
ENSMUSG00000017291	Taok1	E001	0.00951774	-0.0466413					CAAATCTTCAGAGTGAGCCGGGCTGGAGCAAGCAGAGGTCCCGAGTTCAATTCCTAGCCACCACATGATGGCTCACAACCATCTGTACAGCTACAGTGTACTCACATATATAAAATAAATAAATCTAAAAAAAAAAAAAAGCTGAGCAGGGGGCTGAAAAATGGGGTCAATGGTTAATAGCACTTGTTCGGCCTAGCACCGTGGCACTTGCCTTTAATCCCAGTACCTGGGAGGCACAGGCAGGTGGAGCTCTAG	TGTGTACTAAAATTACTTTTATTACAGTTGATCTTTTAAACATTTCCTTTGCTATGATACAAAGGATACTTACAAACAAAATATTACATATGACCTGTTTTCATTCTTAGGGTTCTGACAACTTGGTAACAGCTTTAAATGCACAATCTATACAATTAATACAGGTTATATACGAACTATAAGGTATGCTGAACCAGAAGAATACTGACAATATACTGTACAATAAGCCTTACCAGTTAGTGCTGTGGACCATTT	CTGTCAAGATAGGAAAAGGGAGAAAAAGATCATTTTATGTTTCAGCTAAAGCAGCAATACCTACTCAAGAAAATCAACAGCTATTTTATGGACACATCATCACCATCACCATCATCACCACCACCACCGTCACCATCATCATCTTGATTTTTCAAGACAGGTCTTCTCATGTAGCCCTGGCTGTCCTGGAACTAACTTGGTAGAACAGCTGGCCTCAAACTCAGGGAGATCTGCCTGCCTATGCCTGTTCAATGC
ENSMUSG00000061603	Akap6	E004	0.00951774	0.140381					AACGAGGGTCACTTTTGCCTCCTTTCCTTCATGTGCCAAGGGCCTTGACCAGGCTATCATCCAGCTTGGTTAGAAGAATCCGGTTTTTATCCTACATCATCAATTAGAAATCTCCCTGTTTGTCATGTGATATACGAACTAAATTAGTAATGAGACAAAAGCCTCAATTACACAATTAAAGAGTAAAAACAAAACCTTATAATGTGACAAAGAAAACTGGGAGTGCTTTTGAAACTATTAACGTACTCTGTTTTA	GCCGGCTTGACTCCCTCACAGAAGTGGACGACTCTGGGCAGTTAACTATCAAATGCTCTCAGAATTATTTGTCTCTGGATTGTGGTATTACTGCCTTTGAACTTTCTGACTACAGTCCAAGTGAGGATCTGCTTGGTGGCCTGGGCGACATGACCACTAGCCAGGCCAAAACTAAATCGTTTGACTCTTGGAGTTACAGCGAGATGGAAAAGGAATTTCCCGAGCTCATCCGAAGCGTTGGGCTGCTTACAGTGG	GTAAGGTTAGTTTTAACCTAGTGATTTCTTGTCTGGGTTTTAAAAATAATTCCAGGGAAGTAGTCACCTCCTTCCCATTCTTTATCAAATATGTTAAGTTTTCAATTAAACTTTAAATTCTTCAAAGGAAGAGATGGAAAAACAATTCTATCCATCCCAGGAGCCTTGACTGCTGTAGAATTCTGTTGATCCTACTCAAGCTGAACAGGGTACCTGACAAACGGGCGGTTGCTGGGAAACAGCTTACAGCAGTCA
ENSMUSG00000085440	Sorbs2os	E006	0.00951774	-0.223629					GGCTCTCTACCCACCCTTGGACCAGAGGTGTCTATGGACAGTGTCAGGGTAAATCCGTCTAGTTTATGATGATCAATAGTAATGATGTGTATCCAAGCACTGGTCCTGGTACCTGAAGACGTGGCCCTAGTGACTAATTGCATTATTATTAGCTTCTAGGCTCTGCGTTTGTTATCTTAGCAGGTAGCTGTCATTTAGCAGAACAATATTTGAAATGTGAATGGGTCATATGTATCTCTTTCCCTGAAACATAGC	TGGATCTTGTCCGTTTGCATTCTTCTTAAAGTTCTCTGTGTTCCCTTTGGAAAACTGCATGTGCTTCCCTGACCCGGCCCTCACCCGGTTGCGAGCGGAGAGTTTAAATTCGCATCCAGCATGGGATGTCTGGCTCTTGACTTTTTCATCTGTACCGTACGTGGCAATGTCTTCCGTGAAGGGAAAGGCTGG	GAGCGAGTGTGGTTCCGGCTGGGCGTGACTTCCCTCTGCTTGTCTGAGAAAGCGCTGGAGAGTGAGGTTGAATGGTGTCCAGCCTCCCCGCTCCTGTGGTTTTTGTTCTTGCTCTTGCCATATTCCTGACCTTGGAAAAATCAATGAGACTAAATGTCAACTTCCCCCAAAGCTTGAGGAGACCAGATTGTGCTCAAAAGTTTGAACCTCGGGTATTTTGACTTTAAGCACCCTTCAAAATACTTGAATTACTAA
ENSMUSG00000056004	9330182L06Rik	E038	0.00951876	0.1149					TTCTTGAAGATTTTATTTTTAAGCCAATAAGGAAGAAGTTCAATTTTTGAAATGCATATACTTGTATTCATAGTAACCACCTTCTTAGCAATGCATTGTTCTTGTTCGAAAGCAACCCAGAAACTTGTGACATTTCTCATGATGGATTACCAGTATTAGTGTGACTTGGATATTATTTTTGAAAGAAGTTTGACGGTGAACTTGATCAAGCTTGTGTAAACATTTAGACCTGGGAATTAGAGTATCTTACCCATT	AAACCACTAGACCTTTTTGCTACCACTAAAAGAATGGTTGAATGCATGTGTATATGTGTGTGTGCATGTACATGTGTGTATGTGAGTATGTATGTATCTACTACTAAGTATAAAAATAGGTGATGTATTATTGTTTGTCATAAGACTGAAGAGAATGTTACTTAGCATAATTTTTGCATTTAATTTCTTGAATATTCTAAATTATTTTGGCTTTGCTCACTTTTGTCCCAATGTCAGAATATTGGCATGGCTTTC	TACTTTTTGTATAGACTTTTGTCATTATTTTTCTCCCCTAAAATGATAAAATGGTTTAAGTTAGTACAGTGGAAGAATTACTTGAGAGCAGTTATTCACCATTTGGGTTCTCAGGTGTTGGGTAACAGTGGGTTTGCTTCTTTAAGTCCCATCTAGCCAAGTGTCATTGGATGTCTTTTGGTAACAGTGTTTCCCATGGCTCATGGTCATTTTTAGTGGGAGGCTGATATGTTTCTATTTTCCTCATAAAACCCA
ENSMUSG00000054728	Phactr1	E044	0.0095859	-0.0499543			recognized	137	CAGTGCAGCCACCCAGGTTGGACCTCCAAAGACTCCAAACTAAACCCTCTTAGGTCTCTAGATGAGTTCTGTGGAGTTTGAGAACTTGGGGTACCCCTCTGTGTTTGTGTCATGGGTGGGAAGTCACACCGGCATCACTGTCACAGCCCGGGTATCTGAGAATGGGAAAACACTGTTGTGGGGTCTGGGCCTCTGACATCCCCTGAGCCTTGACAACGTTTCTTGTTCCCCAGGTTTCATCGACCTTAACAGTGG	TGAGCACTCCTCAGCATTGCTGGCACCACTTCTGCTACAGAAAGGTGACCCGGCCCCCCGAGACAGGGACCTACCTGAGGATTGTCCAGAAACCGCCTTGTCCCCTCCATCCAGACCCAGCAAGCACCACATTGGTTCAGTCTTCGGTGAACCCCTTCCTCACAAGGGACTGTTGCCTGAGTCCAAAGAAGCCCAGGGCTTGACATGGGAATGGCTAGGGTGACAGTCATAATCCAACTGTCCTTCTAGACGTGG	GAGTGATTGTGGTGACCGTCGCTCCCGCGCCCTCCCGGGTTCTAACTTAACAGATGACGGCCGTATGAAGAAGATACTGTACATAGACTATAAATGAAACTGGATCTCTGTGGCCTAGGTTTTGTATATACAGAAACTGCATGGTATTTAAATTATTGTTTCTCTCTGATGATGTATGCAGTTTCTTTAAAAACAAACCAAAAAAAAAAAGTTTAAAAAAAAAAAAAACAGCTTTGACTCCTGTGTTGTTTTCTC
ENSMUSG00000035696	Rnf38	E002	0.00959046	-0.0861604					CAGCTCTTTTCCAGGTAATGGTTCATAATTAGGGTTTCTGGATGAATTTGCTCAAGTTACCAGGTCAGCATATTGCTTACATCTGGAGTTAAAGGAGACCCATGATGCAATCAAGTATGACAATAAGGAGAGGGTCCTTTTGCCTTGTTGACAGTAACTTGGATATAAACTGACCTTAATGCATACTTCCTTTTCCGGTTACCTGGGATGTTTCCTGTATTTCACGGTTCATGGGAGGAGGTGGGAAATGATGGT	TTGAAGTGTACATCATACATTTATTACCAACAACCCTCTCAAACTCCAAAATTGGGCACAGGGATTAAAAATAAAAATTCATTGCACTACTTAGTAAAGCATTACTAGTAACTTTCATAAAAAATGTACAAACTTTGTTAAAAATTTATCAAGCCTTCAAATGATTTTGGTTACAGGTATTTATAATACATACATTTAAAACTCTATGTTAACTGACACAATGGAATATGATTTGAGGAAATGACTCGGCAAATG	TTGTGAAGACTAATTGTAAGCTTTTATAGTTGATTAAGTCACACAGTGCAAAGAAAGGTCCATTGACCCTTTTGGTAAAGGGAGGGCTGGAAGCCACACAGGTTAAGTTCGATGGATAGTCCATATATACATGTGATGAGGAACACCCAAACTAAATTTGTGCTCTTAGGCTGGTCACTCTGAATCGCGATGCACTTCTGAAGCATCAGCTCGGCAAATTGGGCAGGTACGGTTTCCCTGAAAGACAAGAGGGAA
ENSMUSG00000039852	Rere	E036	0.00983992	-0.097706	recognized	132			CTGCTGGGTGGGGTGGAACCTAGAAGCAGACAGATTGGCCAGTCTTTGCCTGTAGCTGCAGGGTCGCCTCCTGCATCACCTAGCATGTCCTGATGTCCATTCTTCTGTTTTCTCGTTTCTCACCAGTCGACTGAAGAAAGAAGGTGACAAGCAGTTATAAGTTATTTATTTGTTAATGCTGGCTGTGGAAACCCCAGTTCTAGGGGGCAGAAACAGGACATTTACATCTAGTAGGGGCTGCAAGAGCAAAGAGGA	ACTGTGCGCGCAGACACTGAGGCACGTGGGCTCTGGAACCCGCAGGGTTTGCAGAGAGGCGGCATATGAGTTTGAAATCCAAGAGCTATAATTTTTAAAAAATCTTTTATTTTAATACATTGTAGGAAATCTTCATAATTTGAGACAGTTCTGCAGCATGGCTTTTTACATCTGTAAATAAATAATTTTAGAAGTCTTTTTTTCTTTCCACAGACGACTATTCTGATCTATTTTTTCCAGCCATGTCACAAAGTG	AGCACCCTGTGTGTTGGCCAGTGCACTGTCTCATTCTGGAGTGTGGGTGGGGCACTGGAGACAGACTGGGAGTGTGGGCGGCATTCTAGAGATGGGCCCTAGAAAGAGTGGGTAAGGGCACTGCAGATGGCCCCGGGGAAGAGAGCTTGATATTCCTTGCTCTGGACGCTTAACCTCTTGGAACTTCTAGAGACAGGCCTGTGCTGTCTGGGAGAAGCTGCCATAGCCAATCCCCTTGATCTGTGAAACTAAGAT
ENSMUSG00000040035	Disp2	E019	0.0100163	-0.0886876					CTGGATTTCCCTCTGAGCTTCACTCCCCCACTCCTGTGTGCCCTACAGATCCGCTCTCACATCAGTTTTGGGGCTCTGTGCCAGCGATCAGCAGCCAATGAGTGCTGCCCCAGCTGGTCCTTGGGCAACTATCTGGCCGTGCTGTCTAACCGCTCCTCCTGCCAAGACACTACCCAAGCCGATACAGACCGCACATTGGCCCTGCTACGGTTCTGTGCCACCTTCTACCATCGTGGTGTCCTGGTGCCTGCTTGT	CACATCTATCAGTGGCATGGACTTGGGCCTCAAGCCCAGACTGCTGAAGTATTACCTAGCCGAAGACACCATGTATCCCTTGATAGCCCTGGTTGTCATCTTCTTTGGCATGTCCCTCTACCTGCGCTCACTCTTCATCACGTTCATGTCACTTCTAGGGGTGCTGGGCTCCCTAATGGTGGCCTACTTTCTTTACCATGTGGCATTCCGCATGGCCTACTTCCCCTTTGTCAATCTAGCGGCTCTCCTTCTGCT	TTTTGTTTCTTTCTTTTATTTTTTTTCTGTTTCAATGTATTCAGGTTGGGTGTGGTTTACACACACACACACACACACACACACACACACCGAATATTCTGGGTCTGTGTGGCTGGTAAGGCCACAGAGAGGGCTGTGTAAGCCAATTCCTTATCAGGTAACTAATTTGATAAATGTCTCCTGATCAAGGAGGGCTCCGTTCGTGTACCTGTAGTGTCAGCTATGTGGGAAGCTGAAGCTGGAGGATTGCTTGAG
ENSMUSG00000041570	Camsap2	E001	0.010139	-0.0661373	recognized	269			TAGGATCAAATGTTTTTATTTTGGAAAATTAAAATACTGGAGACTTATGGAAGTATAGTTGTACTCTGAGGACCAAGTGTCTTTTTTTGTTTATCTTTTGGTTTTTCGAGAGCTCTGCCTGCTTTCCGCCGCCTAAGTGCTGGGAGTAAGATGTGCGCCACAACCACTTGGCTGAGGACTGAGCATCTTACAAAAGAGCTCAGGCAGTGTCTGAGCGCACAGTTATGCATGAGGGTTGTTCTGGCTATCAGGATT	GCATTCAAGCATAATTTAATATTAAAAATTACTTAGGTAAATATTCAATTACTAAATTTAAACCTAGGCTGAGACAAGAAAACTTCATGATGTATTTTCCTGAGTCCAAATAACGTTATCAAACACAAGACAAGACAACACGCACTTTATTGAAGAATCAGCGTCAGTTGGTGCCATGCTTTTATTCAGATGAAAGGGGAACTACACTGTAACCCCCAGGAACGAGCAAGCCTGACGGATCATCTGCAGCGCTCA	CTTTAGAACAGAAAACAAAAACAAGATAACAATGAAGCTGTAACATTTTACTAAGTGTTTATATATACTTGTTAATATTTCTTGGTTAAAACTTATGACATAGTCTAAAACCAAACTTTCTATTAGTATTTTGGCATTATCAGGGATCGCCTACACATGCTAAGTAGGCGCTCAGCCACCGTACGCTAATTAAACTGTAAGTCTTCCAGAACTCTGAGAGTAGAGTAACTCCATCTAACACTAACACCCATCACT
ENSMUSG00000022797	Tfrc	E028	0.0101834	-0.0720467			recognized	340	ACATAGCAAATTCCAGATTGGCCTGGGCTTAAAAGTGAGACTTTTATCTTGAACAACCAACCACACCAAAACAAATAGACAACTGAGCAGGTAAAGTAACTAAAACCTCAGGTGCCTAAATGAGGTTCCAGGAGGCCTTGTAAAGGTGAGCTGTGTTGCTGTGCCCTGCAGGTCACACTGAGCTCACAGGTCCTCCTGCCTGGGCCCCACTGCTGGGATTAAAGACAAGGCTATAATTAGGTTTTTATTATTATT	TGGAGTATCACTTCCTGTCGCCCTATGTATCTCCAAGAGAGTCTCCTTTCCGACATATCTTCTGGGGCTCTGGCTCTCACACTCTCTCAGCTTTAGTGGAGAACTTGAAGCTTCGTCAAAAAAATATTACTGCTTTTAATGAAACCCTCTTCAGAAACCAGTTGGCCCTGGCTACTTGGACTATTCAGGGAGTCGCAAATGCCCTCTCTGGTGACATTTGGAATATTGACAATGAGTTTTAAATGTAACATGCAT	CTGACTTGTCGGACTCATTTCATAGCAAAACTAGCTATAGAGTTCTTATATCCTCCTCCACTATCAACCTCACCAGAGTAGTAGTTACGCAGACACACTGATCTCTTGATAGAGATTCTAATCTAGCTTCTTGTCCTTAGTATATTTACATAGATTCTACAGCAACAAAAATTGGTCTTATTTTGAGCCTCACTGAGTTCTAAAAATTGGGCCTGAAAAGATGGTATTAACTGGTCTTGCAGAGGGCCTAGCTTC
ENSMUSG00000037902	Sirpa	E032	0.0102001	-0.066538			recognized	358	CCTGGACATGGTCCACCTCAGCCGGGCACAGCCAGCCCCCAAGCCTGAGCCATCTTTCTCAGAGTATGCTAGTGTCCAGGTCCAGAGGAAGTGAATGGGGCTGTGGTCTGTACTAGGCCCCATCCCCACAAGTTTTCTTGTCCTACATGGAGTGGCCATGACGAGGACATCCAGCCAGCCAATCCTGTCCCCAGAAGGCCAGGTGGCACGGGTCCTAGGACCAGGGGTAAGGGTGGCCTTTGTCTTCCCTCCGTG	TTTAGATCAAACCGCCCCATCTGTGGAAGAACTACACCAGAAGTCAGCAAGTTTTCAGCCAACAGTGCTGGCCTCCCCACCTCCCAGGCTGACTAGCCCTGGGGAGAAGGAACCCTCTCCTCCTAGACCAGCAGAGACTCCCTGGGCATGTTCAGTGTGGCCCCACCTCCCTTCCAGTCCCAGCTTGCTTCCTCCAGCTAGCACTAACTCAGCAGCATCGCTCTGTGGACGCCTGTAAATTATTGAGAAATGTGA	AACAATAATGCCTTGGGGGTGTTCCATTTTGTCTTTGAAGCTCTGTCCTTGGAGTCTGCCAGTTGCCTGTCCTCTGGGGCTGGGGGTGAGGATGAACTGTGCCAAGGCTTCAAAACATTCTGTGTAACTTGGTCTACGCTAGGTTTTACAGAAGTTCTGTTCCCTTGGCTCAGACAGAGTCATGGTTGCATCGGTTGTGCTGAAAATTCAGACAGACTTTCTCTACTACTTCAGTGTTGTGGGGGATTTGGACAG
ENSMUSG00000048078	Tenm4	E048	0.0102001	0.281355	recognized	415	recognized	129	CCTAGGACCACATGTCAGGCAGAGGCATGGGGTTTCCACCTTCATACTCCAAGCCTAACTTCATGTTAAGTCACCTTCATGCATGGGCCATGCCAGCATTCCAAGAAGATCATTTCAATCCTTTGAAGAACTGCCGTGTCAGCCTCCAGACTCCATCCTCCTCTCCCTCGCGCTTCTGTAACCATTGTCTAAGTTTGAGCACTCAACTGTGTCCCAAGATGTAAAATTGTCATCCCTAGTTTCCCAATATGAATA	TTCGCCTGGAGTGGCCCACAGACTTAGCCATCAACCCAATGGATAATTCTCTCTATGTCCTCGACAACAATGTGGTCCTGCAAATCTCCGAAAACCACCAGGTACGCATTGTCGCTGGGAGGCCCATGCACTGCCAGGTCCCTGGCATCGACCACTTCCTGCTGAGCAAGGTAGCCATCCATGCGACCCTGGAGTCAGCCACTGCTCTGGCCGTTTCACACAATGGAGTCTTGTACATCGCTGAGACCGACGAGA	GTAAGTATCAAGTTGTATTCTACGAGATGTGGTGTATGATTGAAAATGAGTGAACTGATGACATGTGTTTTTTATTGACTTCATTTTAATTCAGGAGTGGGGGTAGAAACCATGATCAATGACAGGTTCTGCATGTTTATATTCCAAATGATTTCTCCTGAAAGGGAAATGGGATGGTGGGAAAGGCATGAGTTTTAGACTCATGTGGGGCTTCCATCCCAGCTGTAGGTACTATGTTACTCTCTCTAGATCTCA
ENSMUSG00000048756	Foxo3	E001	0.0105146	-0.0613486					TTGACGCTGTTCTGTTCCTTCCTATAGCACTGGCAAGGCCAGGCGGGAGTTAGCATAGATGCAGTGAGTGTTGGTTGTGTTGCCACTGGAGAAGAAGCCTGGAGATGGTGTCTGGTGGTCAAGTGTGCGGGAGGGAGGGCCCCAGTGATGGTCCATGGATATTCACGGGACTCACACGAGGAGGACCTCCCTCTTCAGGCCCAGTCACCCCAGGAAAGCAGTGTCTGATCCTCACTTTCATGTTTAACTGCCCCT	AGATAGAGTGTCACCAAAGCTTTATTTACATGCGTCATCATCTCTTTTACAAACTAGATTATGGTTTTAAATGGAATACACAGGCAATATCTACAAACGCCACGGGAAGTACGCACCTCCATTCCACCGGGAAGGGGCAGATTCCCAAATCAAACTGGTTTTGATCCTTGAGAAGAAAGGCGGCAGAGCTAACTCACGGCAGCGTATGGTTAGACAAGGTCCTCAGTACCCAGAATGCAGCAGGATTGCGTCTGC	TGGGGTCCCACAGGCTCAAAAGCTTGCGATGCTCAAGGCCAGACTGGGAACTGATATAACACCTTCCTTCTGCTTTTAAGTGTGCTAGGGAAAGGACAGTTAACATTTTCAACAGAAAAATACTGCAGGTTACTGTGTGTAGAAAACTCAGAGGGTCAAAGGAAACAAACACAAGACGACACTTAAAATATCCCCTAAACCATCATGATAGTAAAACACGACGGAGTCGCCAACGGGGTCCCGGTGTGCTCTGAA
ENSMUSG00000068748	Ptprz1	E012	0.0105664	0.0533399					ACTTTTGGGATAGCATTGAAAATGTATACGAGGAAAATACCTAATAAAAAAAAGAGAGAAAAAAAAGATAAATTTTCCATTCCATGAAGCTGAACATGGGTGCTCAGAAAAACTGGCTCAGACTATGAAGTAAATATTTTTGTGATATTATTTTAAATATTTTGTGTTATCTCTGGTTCCTTATTATATAGCATTAAAATGTAGGCAGTTACAGTTAAAGTGCCTTCATTTGGCTTAATTGCTTTCCACAGTGAG	AGGAAGAATATGGAAAAGACAATGAAGAAGACACTGGCTTGAATCCTGGTAGAGACAGTGTCACAAACCAAATAAGGAAAAAGGAACCCCAGGTTTCTACCACGACTCACTATAATCACATGGGGACTAAATACAATGAAGCCAAGACTAACCGATCTCCAACAAGAGGATCTGAATTCTCTGGAAAGAGTGATGTTCCCAACACTTCCCCGAATTCTACTTCCCAACATGTTGCTGAATTCGAAACAGAAAGAG	GTTAGTTATGAGCAAAGGAAAAGAATGAGATGTGATGATTTCTTGCTATGAAAGTAAAAAAATAGAAGAATCGTGGAAGAAAGGAATTCCGGTCCACCAGCAGACCTTCACTTTTTAACCAGAACGTTCAACCATTTGTAGCTCCTATAAATATAATTTCACTCATGATTTCAAATGAATATCCAACATATTTTTGGTCCTTGGTTTAATTATCTTCAAAATACATTGTTTGTGTGTTGTTACTAATTCCTATTC
ENSMUSG00000007617	Homer1	E023	0.0105854	0.292084	recognized	230			GTCTCTAGAGTTGAACAATTATATATTCTTAAACATACATTCCTTTGATCCTGACTGTGAGATCAGGATCAGTATAAGACCAAGTTGCACTCTCATTTTAGGGAGTTGCTTCCTTTCTAACTCTAACTTTAGAGTTACTGGTTAGAACTTACTTCCTTCTTGTCTCTGCCTACCCTCATCTTATTTCTCAGTTACGTAGGAGTAGCAATAAAATGGAGTTGTACATAATCTTCCACAACAAGGGTGTTGTGCTTG	AAGTTGAAATTCGAAATAAAGACCTGGAGGGGCAGCTGTCTGACCTAGAACAGCGCCTGGAGAAGAGCCAGAACGAACAAGAGGCTTTCCGCAGTAACCTGAAGACACTCCTAGAAATTCTGGATGGAAAAATATTTGAACTAACAGAATTACGAGATAATTTGGCCAAGCTACTGGAATGCAGCTAAAGAGAGTGAAATTTCAGTGCCAATAGATGGAGAGATGCTGT	CTGTCTTCCTAGGACTGTTTGGGCTCCGTACCAAGATTGCACAAAATTTTTTGAATATCATTCCTCCAGGAGGAGGGTGTTTTGAAAATTGGAATTGTATATTTCAGTATAAATTTTAGAATTTAGCTTATAGCTAGTTGGGGAAAAAAAAAGACATGAAAAACTTGAACTACAAATTACCTCCATGTATATTGGCCATAGTTAACTGGAAAGTTATAAGTAGACACTTTAATGCAATCTTTTCCCCCTGATATT
ENSMUSG00000024261	Syt4	E001	0.0107777	-0.0455009			recognized	400	TATCCCTAACTCTATGTCTGCCTATGGATCCTGATCCCCTAACTGGGCTGCTTTGTCTGACCCCAGTGGGAAAGAATGTGCCTAGTTCTGCAGTGACTTAATATGTCAGAGTGGGTTGGTACCCAGGGGGTGGGAGGGGAGTCCTCCTCATAAGAAGAGAACTTGAGGGAGTGGGAAAAGGCTGTGTGCGGGGAGACTGGGAGGGGAAGGAGGCTACAGTCAGAGCATGTTCCTGGACAGACAGGACTACACAGA	TGGGCAAAAGCAGCAGTTTATTCATGTCTTACAAACACACAGTGCTGGCACAAAGGAACAGACAGCATCTCCCTAACACCATGCTTCCCTCCGGATCACTACTGAACTACAACAAGTCAGAACGGGTCAGTTACTGAATCACACAGTTCCTCGGACATGGTAACCTCCCGATTTGGGGGGTTAGACTGGCTAAGCACACAAAAAATAATAATGTACATGTTGAATACAGTGCAGGAATTTTAGCAGAATTGGATA	CTGCAATGGCATACAACAAGTGTTATGTTGACAACAATCAGCTGCAAGTCTGGCCTCCTTAGTGAGCAGGACACCCCAATACAGTGGAAATGGGGCTCTTACAATGTAAACAAGTCTAAACAGATGGGAAGTGAAAATAGGTTTCACTCTCCTCGTTTTAATTAAATTGAAAATAATGATAAATAGAAACTAGTTCTAGACCTGCCGTCAGGGAAGATAAGAGAATGCTGCATGCTGCCCACTAATAATTAATTG
ENSMUSG00000036052	Dnajb5	E016	0.0107777	-0.110047					CCCCCTGTGGTGCACGAGCTGCGGGTGTCCCTGGAGGAGATCTACCATGGCTCCACCAAGCGGATGAAGATCACAAGGCGGCGCCTTAACCCTGACGGGCGAACTGTGCGCACCGAGGACAAAATCCTGCACATTGTCATCAAACGAGGCTGGAAAGAAGGTACCAAGATTACCTTCCCCAAAGAGGGCGACGCCACACCTGACAACATCCCAGCCGACATTGTCTTCGTGCTCAAAGACAAGCCTCATGCACAC	CGCTGTGTGGCTGCACCGTGAACATTCCCACCATTGATGGCCGAGTGATCCCTTTACCCTGCAATGATGTTATCAAGCCAGGCACCGTGAAAAGACTCCGTGGGGAGGGACTTCCCTTCCCCAAGGTGCCCACTCAGCGGGGAGACCTCATTGTTGAGTTCAAAGTTCGATTCCCAGACAGATTAACCCCACAGACACGGCAGATCCTTAAGCAGCACCTCCCCTGCTCCTAGGCTCTGCCCTGGCCAGTCTGGA	AAAAATATAGCCTCTGCGCAGAAGCAGTAACCCTGGTGCAGGCAGGAACACAGAGCCACTGTCAGCCTCCTTCCAGGGTCCTGGGCACCCCAGGAAAGCCGGTCAACCTTAGCATATGCTGAGGCTCAACTCTTCTTCCTATAAGCTCTGACCTCTTGGAATTCCAGAACATATACCCCAAACGACAACGCTAGAAGCCACAGCCCAGCTGCCTATGAAAAAGACACCCTCGATTGTGAGAAAGAGGGCCCAGCC
ENSMUSG00000037236	Matr3	E015	0.0107777	-0.0933287					TGACCAATCTTAAATATATTTTAACCAGAAACAAGCTGAAATCCTTTTAAAACATTCTTCATGTTCCCTTAGAATCTGTGTCAAGAAATTATACATTAGAGATCATAGGTGGTCCGTCACCTCTGTTGTAAATAAAGTCTTATTAGAGCACAGTCCATCATAGCCATGATCTTTCAAGTATTGTCTGGCTCTTTTAGGTCAGTGAAATTGTTAGAGCAAAGATAATCTAGCTGTTTCTTCCTATATGAATTCTCA	AATTTCTGAATAAATTGGCAGAAGAACGGAGGCAGAAGAAGGAAACTTAAGATGTACAAGAAGCTTAATTCAAAGAAAACGATGGTTCTTTGATTTTAATGTTAACCTTTTTTAAAATACAATACTGATAGTTAGAAAACTACTGTACACTTTTGTTTTAGTGGAAAATAATAGATGTCTGTTGTGTTTAAGTGTTATAGCAAAAAGTACACATACGGTTAAGTTAATGAAAATGTTTTTGTTTCATCCGAGTGA	GTCATGGTGGCATATATCTTTATTCCCAGCACTTGGGAGGCAGGGGCAGGTTTGCCTTGAGTTAAGAGAACCTCCTGGTCTATAGGGTTCCAGGCCACTTGTCTCAAATGCAAACAAATACGCAAAAAAAAAAAACCAAAAAACTGTATATAAAAATGAAAGCATGATATCCATCAGCATTGATAGTTTATGTTGTATGAACTATTGTGTGAATTTAGTAACTTGAGGAATACTTTGAACAGTTTTTCTTGATTT
ENSMUSG00000084708+ENSMUSG00000065862+ENSMUSG00000059796	Gm22988,Gm24029,Eif4a1	E003	0.0108712	-0.221033					CTTGCGCCACCATACCCAGCCAGTTTAAGTCTTAATGCAGCAAGTTTCACTCATGTCTTGTGCCTAACACTGAGGCAAATTACCAAATGTTAGTAATGTGGGTCATTTGGTATTGCAGGAAGCAACATGGCAAATTCAGTAATCAACTAGTATGGGGGCAGGTGATCCACACTAGCAGGTAGGAGGGAAGGGAAAGAAACAAGAAGCCCAAACAGGCAGTTTCCAAGTAATTTTATTCAGAATTTTGTGTTTGTT	GGGGAAGGAGACGGCGCCTGGGGCAGAGCCTACCCCAAAGAAAAGGGTGTCTAAAATGTTCACGGTTCCTTCTTTTTGCCTCAAAAAGTGACATTTATTCATAGAGAAAAAAAACTGAAACAAAAAAAAAAAAAGCCAAAACAAAAACAAGATGTCCAT	CCCTTGGCTCCCTCCCCTCCCCCCTCCAGCTCTTCCTTAGCCCCACCCCAGGACTGAACCCTGGGCTAGGGCCAGGTCGCAGGACAGCCCCTCAAATGAGGTCAGCAACGTTGAGGGGCATCTCTTCAATGGAGGTGTTGTAGAAAGTCTCAATGTCTCGAAGAGTCCTCTTGTCTTCTTCGGTCACCATGTTAATAGCCACACCCTTACGACCAAACCGACCACCTCGACCGATTCTGAGGGGGGTAAAAAGGA
ENSMUSG00000035941	Ibtk	E020	0.0111414	-1.76873	recognized	376			TGCTCTTAAGAAACTCATGTGTACTTATAATAGTTATCTGCCTCAGGGAACTTTAAGTAAAAATATCTTTTGGTTCTATAAGCTGTGAGTCCCACATTTTTGCATAGTCAATACACCTTGCATGTTTATAGACTTGAGTCATCTATAAAAATATAAAACACAAGAAACCAATATTATGCAAAACTCTTCATTTTATGTTTTATAATTTTGATGCATTTATAACTCTGAGCAATCATAAATGTTAAGATATGCTGT	TTTCTTTTCAGAATTCTTTCTTTTGTCTTCAAACCATTTCCCTTTAAATCCTTCCCCATCCTGTGTGACAAACAGAATTTCATTTCTATTTAAAGCAATATCGGAGATTGACACCTGGCGAGGATAGGCCCATCGGCACTGCTTCAGAGAACTGCTGATTGATCTCCAGCAAAACAC	CTGTGAGGGAAGCAGAGCACAGCACAGCATAAAGCGCACAGCAGAGAGCAAGCACACTCGGAATCAAACAGTACTGTCAGAGTAAGTGCCTGAGCTTGTGTGTTTCCATGACTACTCCTCCACAGAGAAGAGAGATGCTACAAAAATCAAGACGATGTTGGACATACACCTTTTAGGAAAGTAGATTATGCCACATCACGAATTAAAATGTATGTCAGTGGCACTCCTCCGAAGGAGGTGCCGTTTCCTGCATAA
ENSMUSG00000070565	Rasal2	E001	0.0117791	-0.0537711			recognized	374	GGTTAGGAAGGAGAGGAGCACAGTGGCTTAGGCAAGCTGTAGGAAGCTTTCTTTCTAGGGCATTACCACAGCACAGCACAGCACAGCACAGCACAGCACAGCACACACAGCACAGCACACACAGCACAGCACAGCACAGCACACACAGCACAGCACCGCACAGCACCGCACCGCACCGCACAGCACAGCACAGCACAGCACAGCACAGCACACACAGCACAGCACAGCACAGCACAGCACACACAGCCCAGCACA	TAGTCTGAAATGTTTAAAGTTAAAGTTTATTTGTATTTTTTGTAGGAATATCAATAAAAGACCTCAAACGTATCTATATCTGTACATGTACAAGAACCATCAAAAATTATTCACAGAACAAAAATAAATCTTTTTTAGAACCCAGGTAATGAAATGCAGATATGGATCACATATGGAACAATCTAAGTGCTACAAAGCACAAAAATATGGCTTTAAAAATAAAATAAAATCTTGGGTTTTGTTTTTTTTTAAGGT	AAACTTCAAGTCTTTGCTTTAAGCCCTGAAAGACAAGGTTCCTTTCTTCATTTAGGAGTTTCTCACCACACTGCCATTTGAAATAACATTCTGTAAACCTGGAGGGTTAAAGGGCTGGGATAGGAGAGCTGGGCAACTTCCTTCTGCCTCCTCCCACAGTCTGTGTCACCAAGGCCATCAGCAGCTGCTATTTTTGAATTCACCATTCTCCGTGATGGAAAGCTTGGTGGGGTTGGTGGGAGAGATGCCATTGCG
ENSMUSG00000060882	Kcnd2	E001	0.0117987	0.155475					AGCGCCTCCTGCCTCCGCGCCCGGACGCCAGCCCGCTCCCGCCTCGGTCCCGGCCCCACGCCGCCACCGCCCGCCCCGCAGCCCCGCAACCCCGCAGTCCCGGCGCCCCGCAGCCCCGCAGCGCCCCGACCCCGGGGACGCCGGCCGCGCAGTAAGTTGGCAGGAGCGAGTGGCCTGGGCGGCTCGCCTCCCCCGCACCTTTTTGAACTTGTTGCTGTTGGCTCTGCTCGCCTGCGCCTGGCTTTTGGGAAGGTG	GCGGCTGCCAGCTCCCAGGCTCTATAACTGTCACACTGCACCTGAGCTGAACTTGAACAGAGAGTGAAAGGGCCCATCGGGCAAACGCTCTCGGCTAGCGCAGAGGGTGTCAGTCGTCGTTGTGGGGGGGAGAAAGAGCTCTAGACCGACGCCCCCCGCCGCGAGCCCTGCACTTCACCTCCATCTCTGCAAGCGCAGCGTGAGTACAGGCGGCCAGCGGACTCCAAGGGACGCGGGACAGCGGCTGTGACCGCA	GTAGGTGCCTTTGTAGAAAACGGGATGGTGATTGGACATGGGTTGTGTTGATTATGAATCTCTTAAGGCTTCCTGATGCTTTAGAGTGACTACATTTTTTTTCCTCTGAATGGATTTAAGAAAGCACTATTTTAAAAGTTTGGAAACAAACAAATAATTTTGATCTGTGAAATGGGTATGACAAAAACGATTGAAATTACTTGGGAGTTATAGGCAAATATTAATTACTGATACCATAAAATGACAAATATAGAC
ENSMUSG00000028552	Eps15	E046	0.0118673	-0.100082					AGCCGCAAGTAATTCCTAAATAAAAGTATTAAAGCCTTGTATATGAAACATGTTTTTAGAACAATTTTCTCTGGACTTAAAGAATTTTACGATTAACAGATACCTCACGACATGTTTCCTAGTTAAAAACAAACAAACCAATTTCTTACAAATAAAATTTGTAAGGATATGTTCATTTTAAGTGCTAGTGAGGAAAATTTGTAACTTAAAATATAACCTATCCGTTTAAGCAAACACTTAGCCTGTACCCATTTT	AAAAAATCCTAGTTTTTAAATTGAGAGAAAAATAAACCAAGTTGCCAAATTATCAGAGCCCTACTTTTGTTAAAAGCCCATCTTCTGCTGAACTGGCCTGACAGACAGCTGGATTTTAAATGGATTTGAAGTAAACTATAATTTGTAATTTTTTAGATAAGAGTTACTAATTTAGTGTTTGTAATACCAAGATAAACAAAAATGCACCTACAAACTATTTAAAATTCTTTAGGATAGCCAAGTTAAGGTGGTATT	CTTTGTTATCTTGTCCTGTTTTTTGAAAGGAAGTTAGGATATGTATCTTCATAAAGATAGAGCCTGAAACACGTGGCTGTGTAAGGACGCGTGCCTTGGGTTCTTAGGATGTTCCTGACCTCAAATCCCTTTTCTGCTGTTTTTGAGAAATTCCTTTAAGTCATACATGGTTGTGCACACCTTTAATCCAGGAGGCAAAACCAAACAGGTCCGAAGTTCTGACCAGCCTAGTCTATGTGGCAAGTTTGAAGTCAG
ENSMUSG00000017376	Nlk	E020	0.0126058	0.162021					GTTGTTGCCCAGGGTTTAACATGGCTGCGGCTGCAGCTGCTGCGGCGGCTGCCGCAGCTGCCGAAGACGTATGCTGCTGGACTGGGTGTACGGCAGCAGCCGACCCCGGATGAAGGTGGTGTTGAGGGTGGTGGTGGTGGTGAAGGTGAGGAGGAGGAAGGTGTGGAAGGTGGTGATGATGGTGGTGGTGGTGACCTGCTGCAGCTGCAGATGTACCGCCATTGTAAGCCGCCATCATTTTTGCGTTGGCTCTTG	AGAAGAAAAAAAAAAGGAAAAGAAAAAGGGAAAAGGGCCCCTTCCCCCCAGGATTCCTGCCACAAGTGGATACTAAAACTCCATTCTTAATGGGGGGGAGGTTCCAACTTTGAATGTGGGAATAAAGGCCAAACCTCCCGACCCCCTGAACTCCGCACACGAAAAGGATCTGGTAACACGCCACCCTTGGAATCTTGTAAGAGGGTTGACTCATCTACCCCTTCCATTCCCACATCCTTTTCTAAACACCTCCCA	CAGCCGCCGGTGCCGCCGCGGCCGGACTCACCTCCCCTAGCAAAGCCGGATAGAGCGGAGCCAGCGGCGGACACGCGCAACCAGCCGCCGAGGCCCCGCCCCCGCCTCACACTGACCGGCTGCCCTAGCCAATCCACGCCCACCTGTCCGCGTCCGCCTCCAATCCCTGGCCGGAAGCTTCAGACAGGCGCACTGGTCGACCAGTGGCAACCAGGTGTGGGTCTCCTGGGGAAATCCCGCCCCCGGTTCAGGATG
ENSMUSG00000038170	Pde4dip	E025	0.0126058	-0.142598					TTTCCAGAGGTTGTAACTTGGATAAGTTGCTAAAAATGGGATGTCAGAAAGATACTGAATACTAGAAGCCCACCAACAGTTGGGTTTCAACCTGCAGTAGAGGATTTAAGCTCAGTAGTACAGCACTTGCCTAGCATGCAAAAAATTCTGGGTTCAATCCCGCAAATCAGATGCACAGCAACAAAAGGAGAGAGTTAAAGAGAGCATGTCAAAAGGACTTACATTTTGTTCCATAATGAATCTCCTTATAAGCCA	AAACTAAGTTTATTTTATTATAATATTAAAAAAATCCAAACAAAGGCAGACACATTCTAACATAGTCCATACTCCTACAGAGAAATGAAGATTACAGCATGCTAAATCCAATTATATGATATGAATGACGTGTAATCATAGTACCATCCACCTGTGGCTCACGCTGTACAATTCATCAGAACTGTGTTCGGTAGCTAGGTGTCAAATTATTGCACAAGCTTGTGGGCCAAGCACATTCCCTCCAGGCAGCAAGGT	TTTCTTTCTAAACCTAAAACTCATACTTGATTCCTTTATTTGATTAAAAATTGCTTTCAAAGAACAGGATTTGATTGGATGGCAAAAATAATACACACACATGCATTTGATGACATGACGTGGGACTTGTGGCGGGGGTGGTAAGATGGGGGAGTAAACTTTATTGGCCCATGGAAGGGGTAAAGGAATGAGGACAGGCCAGGGAGAAGAGCAGTATGAATGGGAAATTAAAATGGAATGATTTAAGATGTGCAG
ENSMUSG00000018661	Cog1	E007	0.0126672	13.5912					ACACTGCTACCTGTGGACCCTTAGTGCCTACAGTGGGAGAATCGGGAAGCTGTTTTTACCGTGGGCTAGACAGAAGGTTTAGCAGTTAAAGAGCACTTGCTGTTCTCCCAGAAGACTTGGGCTCAGTTCCCAGAGTCCGTATCAGGCAGCTCACATCCACCTACCTAACACCGACTCCAGGGGAGCTGTTAACATCTGACCTCTGAGGGCACCTCCATTCGTGTATGTCCACTTGGAGTACATGGGTGTGGGCGC	GACATACTTAGTTCAAAGGTTTCAAATGGAGTCTTAAGAATTTGTCTTAACAATGATGTGAAAAGCCACAAATGAATACCAGGTGTGCTGGCATACGCCTTCAATCCTAGCATTCCAGAAGCAGAGGCAGACGGATCCTTTTGAGTTTGAGGCCAGCCTAGACTACATTCCAGGCCAGCCAGGAATACATAGTCAATCTATCTTTTAAAAAAAAAACCCAAAACACAAATACAACAAGTCAGGGGTCCAGTGCTG	GTGCAATGAAGACATTAAAAATGGGATCGGCAATCTGCTTATGTACGTGAAGAGCATGAAGGGTCTGGCAGGCATCAGAGACGCCATATGGGATTTGCTTAGCAACGAGTCTGCCAGCCACAGCTGGGAGGTGGTGTGTCAGCGGCTTCTGGAGAAGCCGCTCTTGTTCTGGGAGGACCTGATGCAGCAGCTCTTCCTGGATCGGTTACAGGTACAGTGGGCATCACTGGGACCACCTCCCATTCGAGCCCCGTG
ENSMUSG00000031422	Morf4l2	E002	0.0130155	-0.0988623					GCTAGGACCTGGGCATAGCTCATAAAAGAATGGCAAGAAGGGGCAATTAAGAGTACTTATCCTGGTGTAGAGGTCAGAACCACAGAAGTAGAGAACATCACTAACAAACCAGGCTGCTCCAAGTGTCACGTGTAAGCAATCTGCCCAGAGAAGCCACACCAAAGAGGGAAAATAACTTGACCTTAACTGCTACAGCAAGAATCTTTTAAAAAAGCTTTTGACTTTTAACTATGTGTCTGTGTGGTGGCATATACA	CTTTGAAATTTAGAAACAAGTTTTATTTAAGATCTGAAATACAATTCCTAAAATATCAACTTTTCAGAAAACTGTGGCTACACAATAATGCATTGCCTCTATCATGTTAGAACGTGCATTAGACTCAAATACAAAAACCAGGAAACAAATCACCATCCTTCAACAATTTGAGCAAAGATAGAATGAATGCCTAAGGAACAACAAAGATGGACTTGCAGAGGATGGGCTGTTTACAGACGTCAAGCACCATAAAAA	GGTGAGCCAGCAGAATCTCAGCATACTGAGGCCTTTCAAACTTGTACAGCAGCTGAGTGCCCAGCATCACATTGAAATACTCTTTTATCCCTCCTACAACTTCATTAACTGCGTACTCCTTATTATCAACATTTCCCTGCGACTTCTTACAATTGGCATACTCCTCAAGAATGGCATCGACATTCTTTTTAGCAGGGAGCTGGAACAACTGCTTCTGCCTCGTAACCAAGTCCCAGTCCTCCACCAGCCACGGTT
ENSMUSG00000035247	Hectd1	E001	0.0130155	-0.230156					AATATGGGATATATTTGCTTATATGTGGGTATCAGCCATTAAATAAATGATAACTAAGCTACAATTGGTAGGCCTGGAGAAATGAGGCATGAATGAAGAGACTAGGGAGAACATGCACAGATCTCCTTGGGAAGGGAAGAGATGTTATGCTGGACTGGGGCCGTGAAACTCTTGTGAACTCATGGGGACTGAAGCAGCCCACACAGGTCTGTGCCAAGTCCTCTGCACATATAGCCTGGCTTTCAGGTTCATATT	CGCTGCAAACATTTTAATGATTATTGTTGAGCATACATTTCAGAAATTTACTTCAAACTGCAACAAGTTAAATAAATGTTTATAATATACAAAGAAAATACAACCAAACATAAAAGTCGCTGTGAGTGTGCCTTGCACCTAGGCCAGTGTCTGCCCCTCCCTTAATATATCTTTATTTTGAGCTGCACAAACACACTTTAGAATTTCATCTTTATAGAATGGTATTTATGAAAAAAAAAATATACTCCCACCTTA	CTACAGTAAGAAAGGGAAAATACAACAGCATGAGTTTATCGTTTTTATTGCCTCTTAATCCTAATGTAATTAAGTTCCCATTGGATTCTCCACTAGCTAGTTTGTACCTTTCGTACAACTGTGAGCCTCGGATGCAGGTTAGCCAGTCCACCTGGGGGCAGAGTTGAACAGCCAGTGGTAAACTGCAGGAATGCTTTCCTTTCATCTGAGGACATGCCACATAAAACCCTCACAAACCGCAGGAAGCCAGGACTG
ENSMUSG00000034377	Tulp4	E037	0.0135481	-0.137369			recognized	233	AGACCACACGGAAATGGGCGTATATCTTGTATCCTATGCTGTGGTGCGGTAATCTCATGTTTTGAGGCCACATGAAGTGGCAAAGCCACAGGTTCAGCAGGACAAGGAGGAGCATAGAGGAAGGGGGTTGTGATACTCTAGAAAGTCACCAGGGAAGCCTGCTCCAAGGCAGAGACCTTTGACAACGTTGGCACATCTCTGAAAGTCTCTCAGCGTCGTATGGAGTCTTGTCTTTCTTTTCCCCGGAAGACCCAC	TGATGCAGTTTGGACGGATTGATGGCAACGCATACATCCTAGACTTCCAGTACCCCTTCTCAGCTGTTCAGGCTTTTGCTGTTGCCCTGGCCAATGTGACTCAGCGCCTAAAATGAAGAGACAGATGCAGGAGTAGACATGGCAGGAGCCTTTGGAGGCGGAGCTCATACTGCTACTACCTGAGAAGAACAGGGGAAGCCAGCAGGCCAGGAGGGTGCTGGTCTGTAGGCATGGCCCGGTCGTTCACTTAGCCTT	TATCAATTACATGTGTGCCAAGTTTGAATTATGGGTCTTGGGTCCTTTGAGAAGAAATCACCTCCCTCTAGTGACATGAACTTCTGACCCTCCAGTTACTTCAAGGGTCGCCTGAGAAATGCCATCATGACTGGGAACACTCGAAATGTCCCTGTCATCTCATTGCCCACTTAGTGAATTGTTTTGACTTTTTTGGGGTTTTCATCTTTTTTAAAAAAGAATCCAATTAGTAGTGCATGTCCCCTGGGATGGATG
ENSMUSG00000074505	Fat3	E025	0.0135583	0.193174					TGATGAGGGACACAGAATATGAATACCCACTTTTCAAGGGCTGGATGTACCAGTTCAACACGAAAAACCAGGCAACAATTCCCAACAGCAAAGCTTTACCGTAAAGGGAAAGATTCATATATAAGATGCATTCAAAAATCAATTTCACACTTCTAATTTAAAGCCAATTCAAATGCAATTACTGCACCAGGATCATCCATTTGGTTGAGGTCAGGAATACAATCACCAGGGGCAACAATGATGTTGCTTCTCAGA	ACTCTCATCATCTATGTTGAACCTCCCAAGACCACTGCCATCTCTGATAGAGTACTGGATCTCTCCATCCCTACCAGAATCCTCATCATGGGCAGTCACCTGCAGCACGCTTGTTCCAATCCGTGAGTTTTCTTTTACAGATCCAACAACAGCAAAGTCTGGGAAATAGGGTGTATGAAGGTTTTCATTGACATCTACCACCTCCACCTCAACAAAGGAAACTGATGACAGAGAGACAGGCCGCCCTTTGTCTTT	ACTCATCATATCACATGTCCGTCCTGGAAGTAAACACAGAGAAAAGATATAGATTAATTCAGAAGAAAGTGAGGGAAAGAAACATAAAGAAGAACTGTTATGAAAAAAGTGTGTTCAGAAGGCTGTATTATAGAAAATCTTTCCATTAAAGCATCAATACAAAAAATTGTAACATTCACTGCTACTAGATAGTAAAGAATTCAAAGTCATTCGAATTTAACCTTATCTTGATTGAACTTCCTTAAGTGACGCTTT
ENSMUSG00000016494	Cd34	E009	0.0135732	-0.100472			recognized	295	TGCTAGTCAATGTCACAGTTGATGATTTATGACATCTACTCACTTTATCCCAGATAGTTCAGCTGAATAAGAGAGAATAGGCTGTTAGATTGGACATGCTTACTTGTAAACATATTGAATGCCCCATGGGTGCCATTTTGCTCACAAACATGGGACATATGGAAGGGAAATCTACTCTTAAAGTGTTCTGGATAGAGGGAGGGGAAAAGCTGAAGGTTGACTCTTGCCAATGGCTGGTATCTACTGGGGGGGCTC	GTGAAGACCCTTATTACACGGAGAATGGTGGAGGCCAGGGCTATAGCTCAGGACCTGGGGCCTCCCCTGAGACTCAGGGAAAGGCCAATGTGACCCGAGGGGCTCAGGAGAACGGGACCGGCCAGGCCACTTCCAGAAACGGCCATTCAGCAAGACAACATGTGGTGGCTGACACAGAACTGTGATTTGGTTGGGTGGGCAACTGGGTGGTATGCAGGAAAGTGGCATCTCTTGTCTCTGACTTCATGCTGCCTT	TATAATGCTGACTGTGCTAACTGACCGACTGGTTTCCATATCAGGCTTGGGAAGATTGTATGGCAGTATGGGGGAAGTCAACCAAGGAGAAGACTGCCATAGGAGAGGGACACAGGTACCAGCCAGGGCACCCAGAACTTGTAACTTTATGAAAAGTTCCTTTCCATGTTGAGAGGCAGAGAGGTTGAAAGCTTTCCATAGTAGGGAGAAGGGCAGGCTGAAATGTTCTTTCAAAGGGGTGAGGCATGTTAGGTA
ENSMUSG00000030077	Chl1	E027	0.0135908	-0.0424023					AACAAAATGTTTTTCACAATTCTGGCAACTGGACAGTGATTATCCAGGTAAGGACAGAAGGAGTGTATGCTGAGAGTTAACATCCCCCTTGTGTGCCCTTTACTCTGGTTCTGTCTTTGAAACATCAAGGTGGCTTTCTGGAGGACTCTTTTCTGTGACTGGTAACTTCCAATGACCCAGCCCCCTACTACTGCCATCATTCTGGGGCTTAGCATTTCAGCATGTGAGTTTAGGGGGCTCAGACCACCGTCTCAA	GACAGTGATGAAAAACCTCTCAAGGGAAGCCTTCGGTCCCTGAATAGGAACATGCAGCCCACAGAGAGTGCTGACAGTTTAGTGGAATATGGAGAGGGAGACCAGTCCATATTCAACGAAGATGGATCGTTTATTGGCGCATACACTGGAGCTAAGGAGAAGGGATCCGTTGAAAGCAATGGAAGTTCAACTGCCACCTTCCCACTCCGGGCATGAGAACAACACATTCAGGCACCACGGGTGGCTAAGCCGGAC	AAAGGTGTCTGTGTCCCTTTCTATCCAGTTACGAGCAGAACTTGCATTCCAAGTTTGATCTTGGTTCCTGTTGACTCTGGAAATAAAAATGAGGCATAAATCAGTTTAGTTTGTAGCAGGGTAAGTAGAACATTTTATTCATGTCACTGTGTTTACAGACAGACTCCTTGAAGTCATCGAGGCCTAGAAAACACATCAATCAAATTCACCGTCACAATGAATACAGACGTAACTAACATACATATGTTTTCAGCT
ENSMUSG00000045962	Wnk1	E072	0.0135908	0.339401					ATTTTAGAGATGGAAACACACAAGGCAGTTCATTATTGCAGAGGCTTAGAAGAGAATGAAGTGTACAGGAAAAAAAGGTTTGATATTTACTTAAAGCAAAAGAAAAAAAAAAAATTCCCAAAGGCTGAGGATATATTTAGCTCAGTGGGAAAGCACTTGTCCAGGCCCCACTTCTTCGATCCCCAACACGAAGGGAAACCCTTTTCCAATAATTCCATGTCTCCTGCCTGACATTAAACACACAAGTTTGTACTT	TGCAATTCACACCAGGCGACTTCCACAGTGGTTTCGGTGTCCAGACCTTTGTAGACTGTCTTAAAGGAGCCTCTGCCGATTTCGATGTCAAATTTGAGAAAGCGACCGTCATTGGACATTCCCACTGCCTTGGTCTCCAGCTCTTCGATATCATCCTGTTGCTGGCTCCTATCCTCCTGCGCCTCTTTGGCGCTGGCGCCACCACTGCCACTTCCACTTCTGGACGGCGGTGGCTCCTCTTTGCTCCCCACGAGG	AATAGCCGAGCAGAAGGAGCGCGTCCGCCCGGGAAAACTCTCCGCTTTAAATGGCGCCGATGTCTGAAGCCTCCACACAGCCCGCTTGGACCCCGCCCCCCGCCGCCCGGGGCGGCCCCGCCCACATCGCGCTCGGGGGGCTCTCGCGCAGGCGTGCCGAGCTCGAGGCACGATGGGATTTGTAGTTTCGCGGTGAAAACCGTGAAAGGAACCCGGGAGGAACGCGCCTACTACTTCCGTGATGCCCTGCGATTG
ENSMUSG00000040943	Tet2	E009	0.0139615	0.147022			recognized	103	AAATGCCCAACAGTGGGAGAGGAAACTTGAAGAATCTACCTTCAGTAGAAAGTCAGAGCAGCAAGTGGAGGGATGGGGTTGCCATCCCTGTCAAAAAACTCTGACACAGAATTGTTCCTGTCTCAAAGGACTGCAGAGACAGGAATGGAGAAGAACCTGAGGTAAAGGAGATCCAATGACAGGCCCAAATTGTGATCCATATCAATGGGAGGCTCCAAGACCTCCCTGATGCTATGGAGTGCTTACAGACAGGAA	TGGATTGCATCCTTCACATTTGCCATTCTGACTTTGTTCACCAGGAGTATCTGATTCTGAAACATCGTCGAGAACAGAACAATCTGTGCTTTTGGTTGCTTGAGGCTCTGCAGCTCGGGCGTGGTTCTCCGATTCTGCAGCCTGGATATCTGTTGGCACTTTCACGTGTTTCTGTGACTTGAGAGTCAGAGCCTTATAGTCACAGAGTGACTTGAGCTGAAACTGCTTCAGGTGCTGTTCCATGGTCTCAATGAT	CTAAAGACACAGAAAAAAGTAAAGACACAGCATTACAGTTACACCAATACCTAGATCTAGCAAGCAGATGCTGATTTTCATCTTTAGCTACTCTTGTCTTCCCTGCATGGAGCAAAGGAACAATGGGATGAATCCCAGATGTTTATACCTCCCCAGTAACTCATATCAGAGAAAAATCCTTTTCTTTAGCCCTTGCTGAGCTATCATGCTGCTTCCTGTGTGATCCTGGAATCATCTCCATTATTGCTGGATCGG
ENSMUSG00000039100	March6	E001	0.0140612	-0.0349176	recognized	257			AAACTTGAACTTAGAAAAACTAGAAATGGCCCCTAAAACCGAAAGATCTCACAATCATAAAGGAGAAAAGGCCACGCAACCCTTTCCTTCTCAGGCATGTAGGCAATGACATAAAACGGTTTCTGATGTGTCTTGTATCAGGCTCCATCCCAAAGCGATGGCTCACGGCAGTGTCACCCTGTGGCCCAGGTGGAGGGGCTTCACGCCTTCCAGTAGTAATGCTCTCCGTCCATTCAGTGCATGGGCAGGGGCAGA	ACAACTAACATTCACTTTATTCAATTCTGTTCTCTTAACTCGGAAGGCAACAAATGACCACATAAAAAAGGGAGCATTTTTGAATATATACACATAAAATTGATCTGGGTACAGGTGTTTACTGTAATAGAAAACCGACCTCCCACATCACTAAGTGTTCTAATTCACTCCTAAACAGACACCCCTAGGCCTTAGTCACTCATTTCCATCTAAGGTTCTATAGGATTGTCATGATTACAAAATGAGGCACTCAGA	CTAGAGTACAAAAACAGGGTGGTCACTTTCTTGTGTGACTCACACATATGCCATTCTTCCAGTGACACCTTGTTAACTGTATTCACAGCAGCTTACTAGCAACCTTTCAAGAGGCAGGCTAGAGGGCGTCTAGAGCGAGCACAAAGGCCAGCACGTTGGAGGAGGGTCTGGCATAAGGTGAGGTTTGTGGGAAGGGCCAGAGCTGTGGAGACTGCACATGATGCTCAGTGATGGGGTCTGTATTACACTGGGGAG
ENSMUSG00000026204	Ptprn	E016	0.0140969	0.697735					GGATTGTGGTCAAAAGAGGAGCGGATTAAAGATTCTGGCTTCTAGTGCTGTTGACTTTAAGTGAGGCCGCAGGTGATTATTTGAAGTCTCTAGGCCTTAAAGTGAGGGACCAGAGGATAGATTCCGAGCCATGATCTCAAAGCAAAGGTGTGTGTGTGTGTGTGTGTGTGTGTGTGTGTGTATGTGTATGTATGTGTGTATATGTATGTGTGTGTATGTATGTGTGTATGTGTATGTATGTGTGTGTATGTGTGT	TTCTTGACATCGGCTCCTCCAACATTTACAGCCCCTT	CTGTAGAAACACAAAAAGCAATAGTCAAGGCCAAAAGGACCAGCACTCTTGAACCTGTTCTATCTGTGTGACCTCTGTCCTATTAACAACCCAGATGCCACCCCCTCTGCCCAGGCTCCCACTCACCCACCGCCTCCATGAGCTTCCCACTCTCTAGTCCCTTTCCTGGTCTAATGCTTCACCTCCCCTGCTTACCCTCTTGCTCCCTGTCCTCAAAAGAACTCTCTTTCCAGCCAGGCTGCTGGACCATGCCTG
ENSMUSG00000041607	Mbp	E017	0.0141255	0.13209					GAAGAAAGCGGCTTTGTCCCCCTCTAGGCCTCGTACAGGCCCACATTCATATCTCATTGTTGTTGCAGGGGAGGCAGATGCGATCCAGAACAATGGGACCTCGGCTGAGGACACGGCGGTGACAGACTCCAAGCACACAGCAGACCCAAAGAATAACTGGCAAGGCGCCCACCCAGCTGACCCAGGGAACCGCCCCCACTTGATCCGCCTCTTTTCCCGAGATGCCCCGGGAAGGGAGGACAACACCTTCAAAGA	TGAGCTCCGAGCCGTAGAGAAGCTGTGGGTTTAAATGCGGAAAGGAAGGAGAGGTGGGCAGGTGGAACTGGGCCAGTCACCATCGCAGAGCAACCGTGTCCCTGTGTCTGAGATACTAGCCCTGATCGGACAGTGCTGATGGCCTGGGGGATTGGGCGTGGAGTGGGCGTGGTCGCCACTTAGCCAATTTCTACTTGTTTTGCTCCCTTTGTCCTTCTCACACGGGACTGCGATTGGGTGTCACTCAGGAATGCA	ACATGGACTTTTTAAGTTGTATTTTTATTTTCCTAATGGCACCGTGTGACTGGCGTTTCCGTGGCTTTGAGAAACACCTACAGGTAAGTCTGGCACTCAAGTTCTTGCCACTTCTGAAATGGCACAGTCCTGAGTCCTCTGTCTCTACCACAGACTCAAGGTGGTCTCTCATCACGGCAGTGTAGCATCTAACTTTTCCCCTTCCCATAGGCATGGTCCTTGTGTGTGCTTAAGTATCCAGTGGATGCTAAGGGA
ENSMUSG00000049313	Sorl1	E001	0.0141908	-0.0630437					AGAGTTGCTCTGGTCATGGTGTCTCTCACAGCAATGGAACCCAAACTAAGACAGCAGGGAAACAACTTGCTCTGACCATCTCCTGACCCAGAGTTATGAGATGGCCGCTGCTGCTCGGTGGTCCTTAGGAGATAAATGCAGAGTTTCCCTCTCGGGCTCACTGTGTGTAAGACGTGTTCTTAGGCACCCAGCTCACCTTCACTGCTGTACTTTCTTCTCACAGATACAAAATTCACCTCTTTAACAGATTGTCCC	TGTGTTAAGCTATCTTTATTGCACTCAAAAGAACAACTTTGTGACACACACAGTGGATATTTAAATAGGTGATGGCGGTGTCTTTATTTTTTTTCATTGTTTTTCTTTTTTAACCCAGTTAAATTTTTATTCAGTGAAAAAGGTTGACACCAAGACCAAAAAAAAAAATTATCTTAAAATTGTGCAACAACGTAGTAAAATCTTCAGCAGAAATCAGTGACTTGGAAACCTAGCCGAGGCGATCGAAGTTATAAA	CTGAAGATAAAACAGTCAGGCCTTGGTGAGTTCCGGTAGAGTTCTAAATGGCCCACATGCCTCCACCCTGCCCGTGCCTGCCGAACCCCAGCTAAACCAACACTAACTAGCCATGTTCAAGTTACTGGTTACCCTCTCCCCATCCCTAGGTGACCGCACTAATTTACTAAATAGTCATTTCGAGTAAAACCTGTAGAAAGGTGACTCTCACCTCCTGCAGCTAAGTGGGTGTGTTGGTTTCTCTTACTTGAGTGA
ENSMUSG00000002265	Peg3	E001	0.0142056	-0.0405021	recognized	374			AATAATAATAATAATAATAATAATGCAAAGTGAAGAAATGGCTTCATGGGCAAAGCACTTATAACAGGGTCATTAAAATCTGAGTTTATATCTCAGAGCCCACATAAAGCCTGCAGCTGTTGCATGCTTCTGTAATCTTAACACTCTTATAGAAATCTTAACTTGCAAGACATCTATCCTGGGGGGTACATAGTGAACTGAAAAGGGCCTTCTCTCGAATGATGGGAAGGTGGGGCTGACACCTGAGGCTGTTAT	TATCTTATTTTTAACTTTATTTTTATTGATGACACTATTACAAGATAGACCAACTACAGCCATATTAACAAACCAAAAGCCTGTGCACAGAAACAAGACAAAGAAAACAAATGGAGATGTTAACACAGTCTTTGGGTAATGACAATATGGGTGAGTTTCTCTTCTACATTTGCACATCTTCAAGGCTACTAGAATGGTCACGTACTGCATATATAAGCAATACGGGCAGCCTGCTAGAACACTATGACAAAGAAC	GGGGCTCCTCGGCATTAAATGTCTCTTGGGCATAGATTTTCTGTACACTGAGGTTGTTGCTGGTAGTTGAGCGTTGTCCAAACGCTCTGAATTTACGCACTTGTTCTTGGATGAAACGTTCTTGGGCATAACTGGTCTGAGGGTCACTGGGCGCAAGGCTGCGGATGACAGAGCGCTCATAATGTCGGCTTCCAGAAGGTCTTTCTCTATCATGAATCTTCTGGTGCTCAATGAGCTCAGACCTACGAGCAAAGG
ENSMUSG00000020300	Cpeb4	E013	0.0142056	-0.0440948					GATAAAATTCTTCTTTTGTTTCTTTCTTGTCTGAAACCTTATTTTAACATGATAATCAATATAGATATCTTATGAAAAGCTATTTAAAATGGACAATCTTCATTGCAATAAGTGCATCACTGCTCCTTCCTGTGGCACCTTGGCACAGGGAGGTGGAAGCACAATACAGAAGTGGACTTGCACATGATACCAAAATGCCAACTCCCTTTTTGTCTCTCCAATGCAGGTGGAGGTTAAGCCATATGTCTTGGATGA	CCTCTTTTGTTAATTCCAACTCTTCCTCAGCCTCTTCACACTGGCATGTCCTGCACAGCAGTGTGTAACTATCAGTGGTAGAATGAAAAGAACAACCTACAACATAGGTATTTTGTAGACTCTCGTGTCACTGCAAACAGTATGTTCAACTCCATTTCACATTGCCATTATGTTGCATGCAGGTTTTAATTCTCTTGTTTTGCTGGAGGCCAAGAGGATCTAAACTTGCTGTAGCATTTTCTTAGAGGAGAGAAA	ATTTCTTTTACTATACTTATTTCATTTTAGCATAAGTAGACTCCCTTTTGGGAATATGACATTTTTAGAACACTAAGAATGTCATGTTGGGCCCTGGCCGAACAAACCAGTATGAAAAAGTCTTTAATCATGTGAGTGCTCATGGCAGGCATTCCTGGCTTCGGGAAGTTGTAAGAGCTGTCAGCTGTAGTGTCTTTGGCCTGGCTGTTAGTTCATGTGCTGCTGTGTGGTGTCTGGGGGTGGGGTGTATCAGCC
ENSMUSG00000026620	Mark1	E001	0.0142056	-0.0836744			recognized	114	GCACATTCTGTAATTTTGTCTGTTTGCTGGTACAGACTGTGCCACGTGGCCCTGGCTAGTCTAGAACGTGCAGCCCCCTCCGTCCGTTTCCTTCCTGCTCTGCCTGTCTTCAGCTTCTCTCGGGCTCCTTCTCCCAGAGCTCTTTCCCATTCTGACCTTCTCGGCTTTCCTTGCGAGTAGCACCCAGAACTCATTCTTCCTTCCCTGCATTTCCAGATCATTTATTAGCCTTTTCTTTGCTCACCCAGCGTTACC	CTGTTGTTAAACAAAATACTATGTCCTATTTTCTAACAAGTGATACAAACTATTTCCACAGAGCCAAGGAAATCCTGCTATCATATAGCCAGGTGTTTATGCAAATATATTAAAATCCCTCTGACTCTTCAAAATGTTATCATGAACATATAAAACAGAGGATAGAAAGTTTCTGTTCTGAAAAGTATGTCAATGACGGGGGTTCCCATAGGAAGGTCAAACTTTCTTGTCATAACAACATCCTGGGAACCTACA	CTACAAGGCAAAGGGGAAATGAAAACCAAGTTGTCCTCAGCAAAGAAGCCACAGCCACGAAGTGTGAGCGGCAACTCCAGTGTACATGCAGTCAGCCCTCAGAGGGAGCAGAGATGCATGTTATCGCCATGCTGTAAACAGGCCTGGGGCACTGTCTACTTTGGCATTTAGCATCTGCAGTCTAAAGCAGCAAACTGTGTTAGGTGTGTGCATCTGTTCTGGGGAACAAATGTGCAGCTGAAAGTGAAAATGTAA
ENSMUSG00000031389+ENSMUSG00000031388+ENSMUSG00000031391	Arhgap4,Naa10,L1cam	E002	0.0143494	-0.151228					ATATTCTGCCCCTTTAGGAGGTGTTTACCTCTTTTAGGAAGGGAGGGTACTAATAATGAGGGCTAAAGCTTGATATTGAAGGGCCATCAGTGCAAAGGGAACCCTAAGCCCACACTGTGATAATGAAATCCAAGGGGAGCACATAACAGGCCTGGCAGTGGAGTGGGATGCCCAAACTGTGGGAAGAAGCAGGAAGGGGGCTGGGACTGTGGGGCAGGGCTGATCAGACCTCAGGGAATCCCCTGCCCAGGGATG	TTTTTTTTTTTTTTTTTGTCTGCTTTTATTTTTCGTGGAGTAGGGTCATCAAAGCTAACTGCTATAAAATGGAGAAACCACCTAGAGACTCAGACATCTGCCTACACACTAGTGGCATATGGGGAAAGGGCAACGGCACAAACTTTCAAAGTCACGGTGTATTTACATTCCCAACGTGAGGGACAGGGGAAGGGGCAGAGGATGAGAACTGGGGGCAGGCAGGGCTGCTAAGGGGTTCTGGGGTATGGTGGCAGC	CTTTTCCCTCAAACTGTGGCCTCTCTGTCTAAATGGGTCGGCAAGGCAGCACCTGAAGATCCCTGATATGGGAGTGAACTGCCCCGAGCTGGGGCAAAGCAGCGTATGCCCAGGAAAGGGTGCAGCTGGGTTTTGGCAATAAAGAGGGTAGCGGGTGGTAAGAAAGAGACTCGAAGCCACAGTTCCTCTCCTCTGCTCCAGTCAAGTCTTCCATGCGCTGTGGAGAGAAGGAAGGACCTCGATCCCAAAGTCAGC
ENSMUSG00000033565	Rbfox2	E015	0.0143742	0.291512	recognized	103			TGTGCTTGCTACACTCCTAATGACTAAGGGTAGAAATGAGGAGTAAGGACACAGTGATGCCTGGCTTTGGCTTGGGACAGTGAATTGGCGGTGTAAGTATGCAGAGAAAGCACCCAGAACACTGCAACATCTGACATCTGAACAAGAGGAGAAGGAACATCACAGCACCCAGGGCTGAGCAGGAAAACCAGGAGGAGGGGCAAGTCATTTAGATGGCCCAGAGTTCCAAGGAACAAGGAGGAGGCTGTGCGAGAC	GTGAGAGATCCATTCTGGTTGCTGGGTGAATTGCTACTCTGTTCTCCATGAGGCTGCGTACTCCCGTAGAGGGTCAGGTTATGTTCACTGGTCTGGCCGGCATAGTCCTGAGTGTGTGGCACTCCATATTCTGTGGGAATTCCATTTTGTGGAGGTGGTGGGAACGGGATGGTAGTAAAAGGCTGAACCATTGCGTCAGGAGTTGTTGTTGGCTCCTGGTTACC	CTAGAGCAAGCAACAGAAAAGAAAGAGGAGTGAGTGAATAAATCTTTATCACACAGGACTCTTAGCATGTTCTCTCACTATCCCCCGCTCAGGAAGAAACTGCTAGGATCATCAGATAACTTCATTCTTTAAAAAATATCAACTGATAAAACTTAATTTTATGTGTGCTTTGCCTGTGAGCATTATGGTATGGTGTGGAGTTAGGACAACTTGATTCTACATCCTCCTTCAACATGAGTCCCTGGGATCAAACTC
ENSMUSG00000056342	Usp34	E004	0.0146188	0.313111					TTTACTGACATTCAAGAGAGAGCGTTTTGTGTTTCTGAGTATGTTTGGTTTTTCAGATAGGGTCAGAATACCCATCCTAAGCAGGCTTCAAGAATTCATTTAAAAATGTAGGTAGATAATAAATTTTGTTAGATAAGAAAACACCTTGTATTAAGTAAGCAGTAGTTTTATTAATGAAGTTATTAATACTAATAATTTTACTACTACTACTGTTGTTTGGTTTTTTGAGACAGGATTTTGTATAACCCTGTGCCT	CAATGTCTATGCTGCTTCAAGGAATATAAGCATTTGGAGATTTTTAACCAAGTAGTATGTGCACTTATTAATTTAGTCATTGCCCAAGTTCAAGTGCTCCGGGACCAGCTTTGTAAACATTGTACTACCATTAACATAGATTCCACGTGGCAAGATGAGAGTAATCAAGCGGAAGAACCACTGAGTATAGATAGAGAATGTAATGAAGGAAATACAGAAAGACAAAAATCAATAGAAAAAAAATCAAACTCTACA	GTAGGTAAAAAATAGGTACAATGATTCTTGCATTATCAAGTCCTATTAAGTTTGCTAGTTCCCTCCTTATCTGTGAATGACTCAAACTGGCGATTTTTTGATGTAAAATTTTCTTTCTTACTACCCTGTCTGTCTGCCATTCCCTTCTTTCTTCTTTCTCTTTGAGACAGGGTCTCACTGTATAGTCCTGTAGTGTGGCCTTGAATTTTCTGTGTATCCTAGGGCTGGCCTTGAAGTTTAATTCACTTGTCTCAG
ENSMUSG00000024083	Pja2	E003	0.0147037	-0.0462372					TTATTAGGAAAATTAGAATTCTAATCCTTCTAAACAAAATCAGCTTTTGTTTAATTTAATAATGTGAGTATAACCTATTACGTAACTGACTCAGAAACATGCCTTTGAGGCCTTTGTGACCCATGAAAGATCATTCTTGATGGGCATAATTGATAGCAGTCCCACGTTAGGTTAGGAGACAGTCAACTGAAGTGAGGCATCACAGAACATCAAGCGTTTCCATAGTCTGAGTCAGCCCAGGAGCCAGGCTCCGCA	CGAGTATATCCTGTTTATTGTTTATGATTTACACGGAAAATGCCAGGCTGGGATTGTAGACCAATAAACCAATCATCACAGTTAGACCTGGGCTTTTGAAAACCTTGCATTCCGTTTTAACAGTTCATATATATTTAACAGCTTATATATAAATCCATATCACAAATAATCTTAAAAGTTAGTTAGCTTAGAGATAACAACTAAGAAACACAAAAGAAATCCACATGAGTTGAACTTTAAATATCAGCATTCACA	CTGGAGAGAGGGAACAAACCAACCAACCAACCAGTCAGTCAGTCAGTCAGAAATCATAGTATCATTATCCTCGAAGCAAGTCAAGTGTCTCTTAAGAAAAGATTTGTTTTAACTTGTGTGTGTGTGTGTGTGTGTGTGTGTGTGTGTGTGTGTGTGTACATCAGGTCAGGTACCCATGGAGCCACAGTGTGTTAAGATTTACCAAGAGCTAGATACAGCAACTGTAATTCATTTGACCTGGCTGTTATGAACCAC
ENSMUSG00000056211	R3hdm1	E003	0.0147826	0.2246					GGAGACTTTCATGTTTTATTTGCATTATAAAACAGAATTGTTAACCCAGACTCACAAATACATTTTGATAGAATGGTGCTTTTTTTAAAAAAATTAAATCAGAGCAATTTTTAAAGCTTGGAAATTTAGGAATGTAGATGTAAACTGTGAAAATGCACTTACTATATGACTGTAGTGAATGCTCTGAGTACCGGAGGGACAACATTATAGAGAAAACTAATTCAATATCATCTAAGTATATTTAGCCATCACGTC	CTTCAAGTTCCCTGTAGAATTCTAAAATAACCTTTGCTAATGAGGATGTCTGATATTGTTATTATAAAAGATGAAACTGAAACAATGAAGGATTTGGAGGCAGAAATGAGAGATACAACCAGAGTTGAAAATCTTATCAAATCAGAAAACTATGGGAAGATTTCGGCAGAGAAGAATGAACATTGTATTGACAACAATATTGATTTGCAG	GTAAACAGAGGTTTTTTTCCCATGGCTACAAATACCTAATCATTGTATGATTATGCTTTGTTTCATATAGAGCTCACTTTTCACAATTATTTTTTTGTTTCTTGTTTTTTGTTTTCAAAACAGGGTTTCTCTGTGTAGCTCTGGCTATCCTAGAACTCTCTCTGTAGACCAGGCTGCCCTTGATCTCAGGGAACTGCCTGCCTCTGCCTCCTGGGGGAATTAAAGATGTGTGACACCACTGCCCAGCCACTTGTC
ENSMUSG00000024109	Nrxn1	E044	0.0150019	0.266253	recognized	352	recognized	19	CCTCAGGGACATTTTATGTTTCCATTTTGGGGTGGGGAAGGGGAGGGAATAGGAATTGCTTCAATCCCAAGGGACAAAAATAAAGGTTTTTGTTTGTTTTTTTACTACAAAAAAAAGGAAGTGTGATTTAATGACCCCAATGTGCATGCTTCCAAATGATCACTAAGAAAACTATAATTTTCAATCAAACAAACAAACGAAAAAAAAAATAAAATCATACACATTACAGGAAGGGCAGGTCGAAGGGATATCCTT	TGACGCAGATTCCTGGTGACTTTCACATCATGCCAGGCATTATCATTAAACTTTCCATTCACAGGCTCCACTAGTGCTTCAAAGGCCCCTGATCCCAAATTAATGACCAGAGAGACAGCTCCATTTTTCAATGCAAGATTGACATAATCAGCTGATTTCCCTGTGTGAAGCATCAGTCCGTTCCTTTGAAGAGTTTTAAAGGACAGAGTTATTTCATCACTGCTGCTTTGAATGGGGTTTTGAGATAAGTCGTAG	CTAGAAGAAAACAGATATATGCATGCATAAGTCAGCAAGTATACTACTCAAGATAGTAGATACAAATACAACAACTAATGACCTCTGCTTTACATATGCTTCCATATATTCAGGACAAAGGCCCTGTCAAGCACTCACATGGGCCTAGGTGGGAGTGTACTTTAAACAAACCACTTCAGAGGGTAGGGCATCAACTACAGTAGCTAAAAGTGACATTCTTGAAAGACAATTGTTGAGAAGTGCTGAAACAGCTCT
ENSMUSG00000031523	Dlc1	E001	0.0152317	-0.102					CCTATAACTTACTAAGTAGACAGGGATCCCTCAAATTCACAGACCTTCCTGCCTCTGCCTCCCTGGCATGGGTATTAAGGGCATGTGCCATCACACCAGGCTCGACAAAGAACTCTTTGATTTAGAATCAACATACAGAGAAGTCGCCATGCTGTCTTTTTTAGTTTAAAACTTAACATCTCCTATGTTTACCAATTTCTAGTCACTGCAATTTCCAAGTGGGCAGCATCTAGGCATAGTAGTACAGGCTTATAA	GCAAATGATCAATTTATTAGGTGTCTACAAGTACAAAACACTGACAGCTGCTGTAGAGAAGTAGAAAGATGTGCAGGAGATGAGCCTGCCCTTGAAGAACTCACAATCTAGACCCAAGAATCATCACGGGGACAAATCGTGGCCACAGTACAAGATGTTAACACCAGTTCTTGGAAAGTTCCGTGCTCTGAATTCTCTCCTCTGGCCAGACGTAGGTAATCTCTTCAACAGGAAAGTCAAAAGTGGGAAAGAGAC	GTTGCAGTCACGGGTGCTTCATTCGCGTCGGTCATCACCTAGATCTCGTGTCCTTGCTTTCAGTGTTCTGATTACTGAAGGAGTCTCGGATCTTTACCACTTCGGCTGCACACAAATGTCCAAAAGATTTTGAGTACCACTCCGGCATGTGGCCCCTGTCACACAGAAAGAAAAGCTGGTGAGTTATTTAAATTAGAAACAACGAAGGCATATGAGGATCATGCTCAGGACCTCATGATTGAGAGAAAAAGTCTT
ENSMUSG00000005886	Ncoa2	E002	0.0159703	-0.0768683					GGGGCAGATCCACCAGCCTCTGCCTCTGGAGTGCTGGGGTCAAAGGTGTGCACCATCATGCCTAGCCCAAGAAATTCTTTTTTTTTATTACATATTTTCCTCAATTACATTTCCAATGCTATCCCAAAAGTCCTCCATACCCTCCCCCCCACTTCCCTACCCACCCAGCCCAAGAAATTCTTAAAAGATAATGTCGTTAATATATTTTTTTAAAAGGTTGTATGTCTATAGATGCTTTGTTTGTTTGAAAACTGT	CAGTAACAACAGATTCTTTATTTACAATAGCATTATTTAACATCAAATAAGCAAATAGCATCAGCAAAGCAATAGTAACTTGCATAAATGTATTTAAAATTTCTCTGTATATATCTACCTTTGCATAAACTGCTCACACTAGAAATACAAACATCAATGCAGATGAACAAAGTGATGTTCAGAGTCAACTCTGTTTTGAAAATAAATCACAACCTGAAACACTGTAAGCTTTCTCCTGAAGAACCATAGTTAATA	GGGACAGTTACTCTGCAGGAGATCTAAGTTGCACTACGGTGAATGCAGTGAACAGACTGCGGGTTGGTCTGGAGGCGAGCTGCAGGCTGTCGGGAGAGGCAACTCTTCCGGTGGCAGCCAAGCCAGCACGCTCTATGCTGCGGGCCCAGGGCCCGACTGTCTGCTGCTATGTCCTGGGAGAACTGGCGGCATGTCAGGTGGCAACACAAAGAGACGCAGCTCTCCAGACTGGTAAATGTTTGTAAGCCCAGTGGG
ENSMUSG00000038244	Mical2	E029	0.0159703	0.470023			recognized	415	TGACCATTACACATCACCACTGTAATGCCCAGAGATGCTTGTCCTTCAGGATTCAAGAAAGCAACACTAGGTAGACATATTTGGGTAAGATGTTCACTCATTTAGATGAGACCAGGAAGAGGCCCTGCAGGACTGGAGGCTGTGTGGGGAGGGTCTTCCTGCACCACGCTCTTCTTCGCAATGACATAAGCTGCAGCCAAGAGCCCAGAAGTCCCTGTGTTTTTTTTTTTTTTAAAGATTTTCAACAAGCCTAGG	TAACCCTAGGGGCCAGGAAAGCACCAGCCTCTGGCCTTGGTCTCAGATGTGACCTCACTCTGGGGTCCTAACCCTCTGGAGGCTCTAGGACACCCAACACTTACCAACAGGGAGTATGATATCATCAGGAACAGTGCTTAGGGAAACTGGGAGATGCTACCATGGAGAACAGAAGCCTTTGACGCCTACAGTACACCAGACACAATGGCACCTACTGTCTGCTGAGGTCTCTCACTATCTCACTCAGCCCTACCA	AAATGAAAAAGAAATGAAAAGAGAAGCAATGTATGCTGGTGCATGTTCATCATTCCAGCACTGGGGAGACACAGGTAGATCCTTAGGGTTCTCTGGCTGGTCAGCCTAGCCTGCTCCGTGTATTCCAGAGAGAAACCCTGTCTCAGAACAAAAGCAGAAAACCAAGGTAAATGGTACCTGAAGAACTATAACTGAGGTTATGGTCTAATCTACACACACACATAACAACCCCCACACAAGACTATACCTACCTGC
ENSMUSG00000022197	Pdzd2	E006	0.016066	0.156766					ATATTTAGGGACCAGTACAGGAGCGTAACAGACAACTTCTGACATGTTTAGAAATTGGAGGCCCCAGCGGAACATTTTAAAACATTGAGAGTCCCCTGCTTAACTCTGGCTGTTCTTAGGGCCCCAAAGACTCCCTGAAGCACGGTCCTTTCCCCATGCTACTCCTGTTCTCAGAGCCACACACTGGCAAGCATATGTGGCTTCCAGGACTGATACTGACTGAAATGCAGTGTGTGGTATCTGGATGGATCCTAG	TCACTGACCAGCTTTTCCCAGAAGGCATGGCCCGCAGAGATTCACCCCATTCCCTGGATCCAGTGGGCACTGTTGGAGAGCTGTTTCCTTTGGGGTAGACTCTGTTGCCACCATTCACAGGACACGAAAGGAAGGCTGATCCATTGACATCCGCGTGGCCTCTAGCTGGAGAGCTGGCTGGAGAGGTAGCTGGGGAGCCTTGCGACCTTCTGGGGGTTATCTCCAGTTGGGTTCTAAAGAGCACAGCCCCTGGGC	CTGTATAGGGTAGGGGAGAGGAAAGGGAAGTGTAAGCAAACGGGAACCCTCTAGAAGTTCTGCAAACATAAGCCATCTCAATACTGTTTCTCAGAAGTCCACAGCCTGCATCTAGACCTTTGGTTTTTTTCTCTCTCCAATTGTAGAGCGCTCAGATCTAGGAACCACCACCCTGCTTTAATGGCCTTAAAGTAACTGGGACAAGCAGAATGGACATTTAAACTTGCCCATTTCCCTCTTTGTTTGCTTTCAGAT
ENSMUSG00000022914	Brwd1	E046	0.0160988	0.768932					CTGCCTAATCATGCCATCCAAGACGCTGGACTCTGGGCTTGCATCTCCACTGTCGTTGGTATGCAGGCTTATAATCTGTTCAATCACCTCCCCATCACCTGCAAAGTCACACACTCATCTGTCATCGTGATACATAGGAAGAACAGGCTGGACATGAAGCTCAGGGGTGGTACCCTGAGCAAAGGAAAACAGAAGCAAAGCACTGTGGTAAGGTAGTTCCCAAGAACTAACCTGTTAGGAAGACCCTACACAACA	TGTGGCCACATAGCCTAGCTGTGGAACCAAATGTTCATCTGCTGAGTTTTCTCGACCTGGTACTAATCTCTGGAACTTGGTTGGATGAGGGTTTCCGTCCACATCCACCAAGAATGGTGGAGGCATAAGATGAGGTGCCTGCTGTGTCTGCTCATCCAAGACATAGTTATTGGAATCTCTTATCAGTGGTCGGTAGTCAGTATGAAAAAACATCTGATCAGGAAT	CTATAAAGTACAGATCACAGAATGACAGTTTGTATTTGTTAAAGACAGTAACATTAAAGGTACTTAGAATTAGAAACGCCAGGAAATTAAATAACTATGTCTAAACTTCCTCTCCCAACTATTCCTTTTATATGCTACAAGAAAGCATTAGAAATGACCTTTTCATATGGCTTGCTGCATCCAAAGCCAAATATCAGAAGATGCCCGTGAGAATCTGTACAGGCAAAATGTTGTCCATCCTGTGAAAACTTGCAG
ENSMUSG00000042453	Reln	E040	0.0164138	1.13333					AACAACACCAAGAACAAAGGATTAACAGCAGTATTCTCTTCTATGATGCTTATGATTGCGAGCACATTGCCTACAAAAAACCCAATAATGGTTTGTGTTTAGGGCCTCAAATTTGCATTGATTTTTCTTCTCATATCTACTGTTTTTATATTGTCACCATGGAATCAGAAACATGGTAGACTATGAAGCTGAAGACCTTTGCTACCTTAAGAAGGACTCACAGAGTCATAAACTTTCAACTCTGCAAATGCAAAA	TATGTTTTCAGTGAATATAAGGGCAGTGTCCATAGAGAGGCAGTCGATATCAACTTGGCCTCCCTGGATTCGATACCAGTTGGCTTGCAAGTCTATGGAGCCATCAAATTTATCTTGAAATCCAGTTTGAGAGCTGTCATTCACTCCTATAAGGACATCATCCAAAGCCCACTGGGCCGAATGCTTCC	CTGCAATCAAATGAACAGCAGCAGTTGGAGCAGGCTCATTACACAGCAATAGGAATATCTCCGTGACCATGATTTTAAATCAAATTGTCTGGAAATTGACAGTAAATTAACACACTTATATATTACACATTGGATATGGATGCTATGTGATCTTTTTTTTTTAATAAAGTCATCAGGAATGTTGGAAAGAGCAGTGACTCACCATGCTGCGGCTGCCACCACCGGAAAGCTGTGGCAGGTGTCTTTGCTTCCCGG
ENSMUSG00000004110	Cacna1e	E001	0.0164778	-0.0323702					CATATTACCGTTATTTTAAAAATTGATTAATGGCACTTGACACATTTAAATGTTTTCCTTGTTCATCTCATAAATATCCTTGATAGACTTGCTTTAAAGCATCAGCTCTTGGGCAATATAGACTATCACCTATAAGAAATAAGAATGACGCAAAGAAAACAGCTGAGTCGTCAAATCAGGTCCAAGCCAGATACGGCAGATGAGGATGATGGCTTCCTATTTAGTTTAGGGGACATCATCTCTGAGAACCAAAGA	GAAAACAGCGTGGATTAAGAAAAGAAAAAGAGTGCTAATGTGAGAAGAAAATATAAGATGTAGAAAGCAGGAGTAAAGCAAACTTAGCCTCAGTCCCATTAAGATGGAGGTTTCCTTAAAAAAATTCAATGCTTAGAAGAAATGCTAAGAAGTTCCCAAGTCCTTGATATAGTGAGTGAAGGTTTTTCCAACTTGACTTGTGGAGGCACGTGCTTTATAATTATTAACTCAGAGCCCTCGGCACACACATGTACT	CTGCAATATGGGAGATGACAGATTAGATTAGGCATGGTGGGCCCTCCTGAGATTGCCAACCCCTTCTGTAGAAAGCTCTGTGAGTCTAGAGATCTGGAGTAGCCTGAGAGTTAGTCCCCTCTGCTACTCATACCCTGCAGGGACTCAGCGATCAAATGAGTAGAGAAGTAGATGCCGTCTAGATCAGAACAAATCTCTGGAAATCAAGTTCAACTAATGATGCAGGTTTAGCCACTATGGGTTTGGGGTAGACCT
ENSMUSG00000064307	Lrrc51	E014	0.0164778	14.05					CAGGGGTTTAATACCCACTTCTGGCCTCTGCCTGCACCAGGCACACAAGGGATGTAGATATACATGTAGGTAAAATACCCATACACATAAGGTTAAAATACATATTTTTAATCTCAAGGCTGAGGATGAAGCTCAGATGTAAGACATTTGTCCTATATGTCAGAGGCCTTGCATTCACTCCTTAACTCAGTAAAACAAAAATATCTTACTCCACCCTCTTCTTCCTTCAAAGACAGCAAGAAGTTGGGAAAATTC	TTGGACCATTTGGACGCTTTTGAAGGAGTAGTCAAGAGGAGGCTCCTGCACGGAAGTGTTCATATAGTCCCGTGAGCTCATAGTTCAGGCCATCATTCATCAGGTGGAAGCATGGGCCCTGGGAGTCTGGCTTCAGC	CTGGGAGGACAGAAGAGAATCAATGCTCCAGATATGGAGTGTCTATGCTCAGGATTCCCCACAGCCCTCCACACTGCTTTCTACTCTCTAGAGCTCTAGGCCTGCCTATCTGCATTGCCATTTTAAGATACTGGTGCTTTCATGTATAGTATACTTCTTAGATAAACTTCACAACACTCTGAACTCATCTGATAGTTCGAGCACCCTTATCTTAGGAGATGTTTTGTTTTATTGACATAGGGTCTAATGTAGCCC
ENSMUSG00000048279	Sacs	E016	0.0164799	0.18944					GACTCACTGCTACCGCGTTTCAGAAAGTGTTAGCTTCTGAAATGGAGACTCCAGCTTCTGTACTGACTTTGAGCAAGTGAGGTGCTGAAAGTGTAAAACAACCCTAAACATATTTGTGTTGGATCTACTTATCAATGTTTACCCATTAAGTGAAAAAATATGTAAATTTTATCTGCATTTTTGATAGTTTTACTTGTGGACAACTAAACATTAAACATTTTGTTGTTGTTACTGATTCCATCTGTAGAACACTAG	AAGACCATGTACTCAGCTGCAGCTTCTAAATCCAGAGCGATTTGCACGTCTTATTAAAGAAGTCATGAATACATTCTGGCCTGGTCGAGAGTTGGTGGTTCAGTGGTATCCATTTAGTGAAGACAAACGTCACCCATCCCTTTCATGGCTTAAGATGGTTTGGAAGAATCTCTATATACATTTCTCGGAAGATTTGACTTTATTTGATGAGATGCCACTTATCCCTAGAACTCTACTGAATGAGGACCAGACGTG	AATACCCTTCCGTGTCAGATATTTTTAAAGAGCTACTTCAAAATGCTGATGATGCAAATGCCACAGAATGCAGCTTCATGATTGATATGAGAAGGAATATGGACATACGGGAAAATCTCCTGGACCCAGGGATGGCAGCTTGTCATGGACCTGCTCTGTGGTCATTCAACAATTCTGAATTCTCAGATTCAGATTTCTTAAACATAACGAGGTTAGGAGAGTCTTTAAAAAGGGGAGAAGTTGACAAGGTTGGGA
ENSMUSG00000002413	Braf	E001	0.017457	-0.0407754					TTCAAGTGTTTTTTTTTTTTTTTTCAAAACGGAGATCCTGAAATTAAATGCATAAAGTCGTTGGGTTAACACCAGCTCTGAGTGAACACATACCAGTTCACTTTCAGATGTGTTTGTGGACAAAAGTCTGTTACTATAGAAAGGCTGTGATTGCCAGCTGTGTCACAAGGGAAAAAAACAGTTCTGAGATGACTTCTACACATCCACTTGCTTTAAAATTTTAAATTAGACTTTCAACTGTATGGATACACAGAG	TTCTCCATGCAGTCAATCTTTATTATAGCAGTATTCGCATATTCACATCAATTACATAGCACTTTTTGGGGGGTTGGGCTTTTTTCTTTAAATATAATACAGAGTTTTTAAATAACTTTACACAGAAATAAATTTCTTCAATTTGATTTTCAGCTATCTTTTTTTATTTATTTCTCCATGCTTTCTATCCAAACTGAACAATATTTTCCATTATACAAATTTACATGAGAAAAACTCCAAAGTACAAATGAAGGG	CTGTAGAGGGAGGACAAGAGCTGATTTTAAAACGTCATCTTGAAAGAACTTCAAGACAGAAAAGCCTTATTTGGGTCTCACTGAAAGGTGATCAGCTAAATATATTACAAACCTTGTAACATAAGTCACTAGTTTAAACCTTGAGTCATTGGAATCCACAAAAAACAATTCAGCCACATCAAGAAAATAACAAGCTACGGAGAATGTCCCAGCTGGGTACCACGCTGCGGGGCAGCCTCAAACTCACAGCCTTGG
ENSMUSG00000031592	Pcm1	E038	0.017457	-0.103819			recognized	180	CCATAAGATTTTTTTCCCCTTGTGTTTCTGGACATGGGTGGTGAACATTTAGACAGACCAGAGCTGCTCCTTTCAGCTCAGTTCTGCCACTTGAATACACGGCATCCAGAGTGGTGGCAGCCTGTCTGTCCTCGGGAGAAGGTGCAGCTGCCTCCCTCTTGGTACAGCCTCATGTACTTAAGTCTTTCAAGAACATTGTCGATAGCTCTTCTGTTTTCTTCCAGCCACTTTTCTCTTGTTTGCACTTAATCATTT	AACAGTGGGAGCCCAGAGTATATGAAATGTCTTCAGAGACTCATCTAACTCTCTTACATAGTCAGCACATTTAAAAAAAAGACACTAAATAAACATTTGCTTTGATCTGTATAAAATGTAAATTAGTTTGACACTGCATTTTTGATGGGTGTGCTAATTTCTGCCCATGGCAGTTTAAAACATTAGAATCTGAATCCTGGACAGATTCAAACCTTGACACACTGTGGGATTTTTCTTTTGCTTTTTGTCCTGTTT	ACTCTGAATTGTATTTTTATTTAAATTGACATGTTCACAGTAGTTGAGAATTTATTCCAAAATTGTGACTTAATCGTTTTTTAATGTTAAAGATTCAGGACAGGAAGAATACACTGACATCAAAGGTATGAATGGAAAGTATTTTTCTTGTGAAGAGCACACACTTCATTATTTCTTAGTTGCATGACCTTTGATATATACATAAAAGGAATTTTGAGATTGGATCTACCTTCTGTGGTTTGAAAATATCTAAGA
ENSMUSG00000021488	Nsd1	E005	0.0175221	0.125587					TTGGTGGGCAAGTTGTGATTAAACTCAGATGCTAATATTGGGCAGTTTCATAGAAAGTCATTGAAGAACTAGGCACGGTAGTGTGTGTGTATGTATGTATATATATAAAACTGCAATTCAACAACAGAAATAGGATTTTGTTTTTTATCTTTTTGGGGGTTGGCGATAGGGGTAGGCTGCCTGGCTTCAGAAAGGGGACTTTGAATGAGAACAGCAAGGTTTTCAAGGAGTAGTAGTGGACATCCCAATATGTGG	TTCCTCAGAAGATTTTGAGTAAATGGGAAGCCAGCGTTGGTCTTGCCGAGCAATATGATGTTCCCAAAGGCTCTAAGAACCAAAAGTGTGTCAGTAGCTCAGTCAAGTTGGACAGTGAGGAAGATATGCCATTTGAGGACTGTACAAACGATCCTGATTCAGAACACCTGTTGCTTAATGGCTGCTTGAAGTCTCTGGCTTTTGATTCTGAGCATTCTGCAGATGAAAAGGAAAAGCCCTGTGCCAAGTCTCGAG	GTAAAAACTTTTATCTGGTAAAAAGTGAAGAGAATTTGTTGATGTTTTTTTTTTTTTCTGACAAAGTTGCTCATTTGAAGACCCTGGGTCTGTCTGTTGTAATGGAATATGTGTTACAAACTTGGAGTCAGAGTTACCACTTGACTAAGAAGACTAATATTTAAATGTGGGATATCTGTATTTTATAAACTTTTTAGTTTTATTTTAGCTATTGGGGATTGAGTTTAAGACCTCAGTGGATGTCTGGCAGCACAC
ENSMUSG00000025422	Agap2	E001	0.0176818	0.123389					CCTTCTAAGTTCCTTGTTTGTCCCCATCCCTGGGGACACTTTCCAAGTTCACTTTGGGACAATGAGTTCAAGGCGCAGTGCAAGTACTCAGTATAGGGTGGGAGCGGGGTGGGAGAGGGAGCTGGGTGATGAGAAGGGAGACTCACCCAGGTACCCTGCGAGGGGAAGGGGAAAGGCCCTGGGAAGGGATAGCCCATTTCAGCTTCCCCAGAATTGACGGGGACAAAGAGTTCTCTCTGTTCCTGTACCTGTCCA	TCAATGTGAGGGGAGCGCCCGGACACAACGCGCATCCGGACCGAGCCGATCCCGGGCGAACCCCCCCCCCTACTCTTCTCCAGGATCCACGCCCCTCCCCTCCCAGACCCCAGACCCGTGGGTTCCTATCTCCTCCCGTTCCCTCTTTCCTCCCTCACCGCCTCCAATAGCTCCATCCCTAGCATCCTCCCCGTGCTCCTGCGAATCCCCCGCACAGACAGCCCCACTAGTCTCTACCCTCAAGACCCCCCTTTC	GTGAGTAGGGAGGGTCAGGGCCTGAGACACCTGATTGCTTACTTGGGATGAGGGGACACTGTGTAAGAATGAGGGGTGCCTTGCTCTTGGGTGGATGGAGGAGGCAGGCTCCTCTACCAAAGGATGGGGCCAAGGATAGGAAGAGGTCCTGAAGCCAGGAGACTGAGATGGGTGTTTTCCGAGCGAGTCTGTGCTTTCCTGGAGATGATGGCCTTGTTGATGCCAACTGTAGGAAATCCTCCCACAGAAGCCTCA
ENSMUSG00000066392	Nrxn3	E007	0.0183685	0.395767					ATCCCCTGTCTGTTTCGTCTCCCTCTTTATGGGATTTCTTGCTTGTGTGCCTATCTAGGGCCGTGTTGTCCTTTTTCCTCTCCTTCCCCTTTCCTCCTAACATTCCTGTGTGTGTTCTTCTTGTGTCTTCTCTTGTACCACTCTGTTTTCCCTCTTTGCCCTCACAATCACCTATCCCCTGCCTCCCGCTCCCACGGCTGATACCTGGCCTACCTGCTCCTCTGTGCTCTGACCCAGCAGGCACCATGAGCTTTA	CAGCTCCGCTTTAGCATGGACTGTGCCGAGACCACTGTGCTATCCAACAAGCAGGTGAACGACAGCAGTTGGCACTTCCTCATGGTGAGCCGTGATCGTGTGCGCACTGGGCTGGTGATTGATGGTGAGGGCCAGTCTGGAGAGCTACGGCCCCAGCGGCCTTATATGGATGTGGTCAGTGATTTGTTCCTCGGTGGCGTCCCCGCTGACATTCGACCTTCTGCCCTGACCCTCGATGGAGTACAGAGCATGCCT	GTAAGACCACCCTCTCTCACCTGCTGTAGACATTCCTGCTGGATTGGGTGAAGGCAGGAGGGATGGCTAGATACCAGCTTTATGTGCTAGCACAGCTTCAGCTGTATGGTAGATAATTGGACCTCCTTCTTCAAAGGAGGTGGTGGAACCTCATCTCCTTGCTCTCAGTGGAAAAAAAAAAAATTAAAGCATCAGATCTCAGCAGAAAGAGAATGGAGGCTACTCAACCATTCACTCCGACTCAATTCAAAGGCC
ENSMUSG00000022629	Kif21a	E001	0.0184592	-0.11178					TGTTTTCCCTACATATGGTCCCTACAGCAAGCATCTGCATAAAGGAAGATAGAGAAACAGACGTAAAGCTCAACATACAACAAACAGGTTCTATTGGGGACCTAAGTAAAAAAATAAAATAAAATAAAATAAAATAAAATAAAATAAAATTACAGCACAGAGGTTGGCCCCTGGAAGCTTCCTCCGCAGCCTCTGCTGCTTTGCCATCCCGTCTCTGTCGCTGGCCTTCTCGGCAGGGATGAGTGGTCACTATCC	ATAGAAACAATTCATAGCACATGTTTATTTAAGCACTAGCTAAACTTTCATTTACAAACAAATATTTTCAGGGCAAAAAAAAAAAAAAAACAAATAACATAAGACAATAATTTCAAAAGTTATACCATTACATAAAATTAACCTTGCAGAATTTACAAATTAATATTCTGAGTAGACAGATAAATTATACATCCTGTAACAAAACCCAATCAAACAGCACTTAGAAATTCATACAGTCATAATGCAAGATAGTCT	CTACAAAACAAAATTAAAATGGACATATGAACGGAGGCAGAAATGCCAAGAAATAGATCTCAGAAGTACTCAGGGAAACTTTTTTAAAGAGGTCTTTAATGAATGCAAGTAAAAAGCAAACATTGATAGAATGCTTCCCGCCTACAACTTTCTACACCACGTGGCACAGACAGACGCCGCCCACTCCAAATCACGTGATCTGTGACCCCGCCCCTGCTCTGATGTCACTGGTGCATTTTTTCACCTATTTTCTTC
ENSMUSG00000065452+ENSMUSG00000028410	Mir207,Dnaja1	E030	0.0187217	-0.100365					AACACAGACTAAACAAGTGTATTTAAAATCTCCCTTTATCCAGTTAAAATTGAAACACCAAATGGATTTCTCTTAAATTATGGGTTACAAGTGGCAACTATGGCAGTTAATTTTTGTTAAGCACCTGGCCTGGGTGTGATGCGTGCCTATAAGCTAGCACTTGAAAGGTAGAATTGGGAGGGTAAAAGACTGAATCATTTGGTTAGACAGTGGTGGCCACACCTTTAATTCCACTGCTTGGGGGGCAGAGGTACT	TAAACTTTCCTGAAAATGGCTTTCTCTCTCCTGATAAACTCTCTTTGCTGGAAAAACTCCTTCCTGAAAGGAAGGAAGTAGAAGAGACTGATGAAATGGATCAGGTAGAACTGGTGGACTTTGATCCAAATCAGGAAAGACGGCGTCATTATAATGGAGAAGCGTATGAGGATGATGAACATCACCCCAGAGGTGGCGTTCAGTGTCAGACCTCTTAATGGGCCAGTCACTCTTTGACATTCTGTATGCAGTAGT	TCCAGTGTGTCACTGCAGGCCTTTTTTTCTCAGTTCATCAAAGCATTATGGGCTTTTATGATGTAATTTTATGTCTATGTTCCTGGAATGTGGGAATACTTAGTATCCATATATACTTATTTCTTATCCATATATAAGAAATAAAGGTATAGGCCTAAGCCCAAGTCAGAAAAGGGAACTTCAACCAACCTGGATGAAAATATGTGACTTTCAGGTCTACCTAGGTCTGCCACATCTCTTCTAGTCAGAAATTTA
ENSMUSG00000032589	Bsn	E013	0.0187218	0.347495	recognized	382			CTGGCCTTGAACTCCTGATTCTCCTGCCTCTGCCTCTTGATTGCTAGGGTTAAAGCCATGTGCCACACCACCAGGTTAAAAGTATTTATTTGTATGAGTATGGTTGTTTTCCTGCATGGATGTCTCTGTGCATCCTGGGTGGAGAGGGCATTGGAGCCCCTGGGACTGGAATACAGATGATTGTGAGCCACTCTGTGGGTGCTAGGAACTGGACCCCAGTCCTCTGGAAGAACAGATGGTGTTCTTAACTGTGGA	TGGGTGAGGTGAGGGTTGGGGTTGAACCCACATTGGTTGCAGACCTTGTTGTGACACTGGGTGCAGGTGTTGAAGTTTGGCTGGCTGGGGGTTGATGTGAGGTCCGAGGTCTTGCATATTGGACACAGGGTGCTGCTGGGAAGAGGGGCAATCTGGGGGACAGAGTAGGGTGACGTGGGAGTGCTGCCTCTGTCCGGTGACACCGAGGGGGACCGTCCTGATCTCTGTGTCCTGCTGTCTACCTGCAGCGTCCTG	CTGAAATGACATTTAAAACGGTTGTTAGAGACACATCTTATAGAATTAGCTTACATAGGTCCCTTCCAACCAAAGTGACCCCAGGTCCCATCACTGTCCTTTCTCTTGCACAGTGATAGCGTCACAGTTGCTATTTACTGTACCCTGTGCTCCAGCCCTGACAAGCTCCTTGGCATCGGGCCATATGGCAGATGGACATGACTGTCCCTCTTTCACACGCTGAGAAAGAGCAGATTCTAGTCGGTGATCTAGCAG
ENSMUSG00000072825	Cep170b	E026	0.0187218	-0.112182	recognized	187			GAGAGACAGAGACCCCATCCTTGAGCCTGGCCCCCCATCCTCGGGCCTGGCCCCCCATCCTTGGGCCTGGCCCCCCATCCTTGGGCCTGGCCCCCCATCCTCGGGCCTGGACCCTCATCCTTGAGCCTGGCCCCCCATCCTCGGGCCTGGACCCCCATCCTCGGGCCAGGACCCCCATCCTCGGGCCTGGACCTCTACCCTCGGGCCTGGACCCCCATCCTCCGGCCTGGCTCCCAGCCAGTGGGCGTTGCTGAG	CATCAATGCCATCGTGGACCCCAGCTTGAACCTCGACCTACTGATGGGAAACAGGGCTCCTTCAGGGTCTGGCCAGCCAGGACTTGGGAAAGCCCGGCCAGCAGCTCAGAGCTCAACTTCACCTGCCTCGGTGGATACCTTGCTGCCAGCCCTGCCTCTCAGGAGCTTCCCACAGCGGGCCAACTGCGGGCCCCCCGGCCTCCCGGAGCCTGCCTTCCTTCCTGATGCTGAGAGGTTTCTGATCTAAGCTGTGAG	AGTGACTGCCGCCTCGGCCCTCTTCTCTGGGGATGGTGTTGGGTGACCATCTCCTTGACACAAGGAGTCTCTGAGGGGCTCAAGACACTAAAGGCAGTGGGTGTGGTGGCATATGCCTTTGTCCAAAGAACTTGGGAGGCAGGGATCTCTATATCTGCTCCCAGCCAGGGCTACTTAACAAGATGGTCTTTTAAAAAAAAAAAAAATGAATTCAGATGTTGCCACCAGGTGGCACTCAAAGCAAGGAAGCAGCAA
ENSMUSG00000020594	Pum2	E053	0.0190509	-0.108269			recognized	297	CAATATAGTGTTGTATAATGTAAATTTATTTCTCCAAATCGAGAGTGATTTTTACAAATTTTTTATCTTTATATGGTTTCAGAAGTATGAACCAGCTTTCTTGTTATTATTGTGGGAGACATTTTGTTTTATAACATAGTTGTTGACTCTGTTAATAACGGACGTGCTAGGATCTGGATCACTTTCAATTGAAGTCAGGGTATTGTGCATAATGAACAGAAAGTATTGGACTGAGATTGATTACCACAGAGGCCA	GCCTATGAAAATATTTTGGAAAAAATTGCTTTGTATATTCAGTTTCTGAAAGATAAAGAAAGTGCTTTGTATTTTGTTGAAGTCAGTATTTTATATAAACTTTATGTTGACCCACTTATGTTCAGTGCTAAAAACTGAAAGGAACATGCTATTTCTGGCAGATGAATAGTAGAAGGGATTTTTTTATTCGAGGTCTGCAGAAGAAAAACAATCAGAGCACAATATTGAGTATAAAGATTCTATCCTTGTGTTACT	AAAATATCCCTCTATATCTCTGTCAAGAGTGCCTGATTACATCACTTCACACACACACACACACACACACGCACACACGCACGCACGCACGCACGCACGCACACACACACACACGTGTGGCTTGCTTTCTGCATAAACTTGGGACTGTTCTAGGAAAATGTATATTGGGTTCAAACCTGAGTTTAAGACTTACCTTACTATTTCCAGACTTTGGCTGTCAACAGCCTGGGTGCCCTAGTGAACTAAAGATTTACT
ENSMUSG00000049583	Grm5	E001	0.0191201	0.227888			recognized	42	GGGAATAGTTTGGATACTAGGAAGCTCTCTTTCACAGGTATGTCTGCTGTATATCACATTTGCTTTTCTGTACTCCAGATGAACAACAGCAACAACAACAACAAATCAATATAAAACAGTCAAGATTAAGACACTGTTTCACCTGGTGACAAAACAAAGCACAAAAATTCCCCAAACTTTTCAGTTCTTTATTTTTGTCTATAATATTAGTCACACTATTTCTTCATGATTATGAATCTTAGGAGTGTTCCAGAG	TGGTCCTTCTGTTGATTCTGTCAGTCCTACTTCTGAAAGAAGATGTACGAGGAAGTGCACAGTCCAGTGAGAGGAGGGTGGTGGCTCACATGCCAGGTGACATTATTATTGGAGCTCTCTTCTCGGTCCACCACCAACCAACTGTGGACAAAGTTCATGAGAGGAAGTGTGGGGCAGTCCGTGAGCAGTATGGCATTCAGAGAGTGGAAGCCATGCTGCATACCTTGGAAAGGATCAATTCAGATCCCACACTCT	GTATGTGATACTTTCCAACTTCTCGGCTAAATATTAAGCTTTTGCATGGTTAAAATGTTCCTCACCATTTTAGGTATTTTGATATGCTTTATTTTCATCAGAATGATAAAAGCTAATTATATTTAAACTAATATAACCATTTATGTGTCTATTAATTTGTTAAATAGCAAGATACATTTTTAATATGCATTGTGCAATTTCAAATTCTGCTGACAACAGCTTTTGATACTTATTTATAAGTATTTTTCAGGATTT
ENSMUSG00000020719+ENSMUSG00000093273+ENSMUSG00000093133	Ddx5,Mir3064,Gm25994	E027	0.019694	0.418289					TGTTTGCCTATCAGGCTGAAGATTTAAGGAAGCAAGTTACACTTCAATCTTAAGAGCATTCCTAGAACTGATTTTTATGATAACATAAAGATACTTACTCTTATTTGATCCACAATTTTCCTTATCTGGGGTTCAAATCCCATATCAAGCATCCTATCAGCTTCATCAAGGACAAGGTAAGTTGTTCTTCTCAGATTGGTTTTCCCACACTCTAAAAAGTCAATCAGTCTTCCAGGTGTTGCAATACAGATTTCC	TAAGTTTGAAAAACAAAAAAAAGTGTTTAGTATAAAACAGTTTACTAAGACCCTATGTCTTCGTGTGTTGGGAATTAGAATTCAGGTGGTCATAAGACTTTTTTTTGAGACAGTGTCTCCTGAATTCTCCAGTTTCTACCTCCCAGGCACTATTCTCAGGATAAAATTTTTGTGTGTGGAAGCACATGGAGAAACCAGAAGGCAACTTTTGCAAGTTGGTCTCTCCTTGTGGTAGTTGATCTTGATCAGGCTCAT	TTAAGATAATACTTACAATAGGCCCATCACCTCTCTCTAGGAATGGCTGGTGGTTTATGTGTACAATGGCAGGCAGCAAATACTATTGAAGAGTAAAAATAATAGAAATTGGATTAAAATAGTTATATATCTAAGGTCACCTCTGCCACAATTTATCAAGTTTTCCTAGACTTACAGATAATGTTTTCCCAGATCCAGTCTGAGCTACTCCAACCATATCCAATCCACTGAGAGCAACTGGCCAGCCCTGAGCTT
ENSMUSG00000069662	Marcks	E001	0.019694	-0.0478193					GGCACGCTACTGGAATCCTAGCTCAGGCAGCAGGGTTGTCAGTTCAAGACCAACCTGAATGGTATCATGAGCCTGTCTCGAGGAACTAAACTAAGAGTTCAGAAAGCACTGTGCCCCAACTCCTTAACCTGATCAGCAAGGCTCACTTAACTTTATATCCATATTTGGAAAAAACATGAATGAATTGCTAAGTTTTGCCTTAGCCAATAACTCAATGAGTAAGGCCTCACATTCTAAGTACAGTATCAAGCATGT	CTGTACAAGAGTTATTTATTTTCCTTAATCTCAAAGCTATTTTTAGTAGTACAAAAAAGCCATATTAACATTTTTTTTTCCATTAGAAAACAACAGGATGTACAAAACTTTGGATGAAAAGTATGTCAAATTGCATTTAGCCACTTGGAGGAAAATCCACCGCTCCATCAATACCACCCAAAGTGTTTTAGGCAGTGATTAAAATCAAAATAATGCATCTTAATAAATCTCAGCTGTTAAAAGAACAAACCTAGC	CTGCGGGGCAGAAAGAAAAAGACGGGGGCGTCACTCGGAGCGACCGACCCGCGCGGGGCAAGCTTCCGTGCCCGGCGGCCGGGGAGTGGACACAAGTCGCCCACATTCTGAGGCCTGCATCAGGTTCCCTTCCCTCCGCCTCGAGCAACGGGAGCTCCCGGGGCTGCGCGTTCCCGGGTGGCGCCGGCAGGGGGCGCTGCTCCTCCACCGCGCGGAGCGCAGCGGGGCGCGGGCGGGAGGGCGCCCAGGGGCGGG
ENSMUSG00000069662	Marcks	E002	0.019694	0.13532			recognized	230	AGCTTGCCTTTCTCCACCGCCATCCGCGTTGGCTCCCCCCTTCCTACACACACATACACACGCGCGCGCACACACACAACCACACCAGAAATCTCAAAGACGACCCAATCTCGACAATAAATACGTGAGCCACCCAAACACCACTGTGGCCCCAAATACAAATGCAACCTGGAGGGGCGTTGGGGGGGGGGTGCATCTAACTAGTCACGTTCAGCCAATCTCCAAACCACGCCATTTTAGACGATTTATCACTCT	TGCCCATTTGCTTTGGAAGGCGACGAGGCCACAGCCGCCTCCCCGGGCCTCTCGGCGGTGGCTTCTCCCTTCGCTGCGGTCTTGGAGAACTGGGCACCCATGCTGGCTTCTTCAACAAAGAAACTCAACAGATCCAAGAGAGGAAACAAAGAGCCTTCGGTTGGTGTAACGACGGGGCGAGCAGCAGCAGCAGCAACAGCGGCGGCGGCACACACACCGGAGGGAGGGGGTGGGGGTGGCGAGGAGGACAGAAGA	AAGTGCACAGATGAATGGGCTCGCGGGCGCTGACGCGGCCCCCGCGCGCGCTGGCCAATCCGCGCGCCGCACACAAAGCAGGGGGCGGGGCCTGCGCTCCGGGCGAACAATGGAGCCGCGCTTTGCAAACGGTTTGAAAATCAGCCTCAGACCAAGAATTAATGTCTTCCAAATAAATAAATCAATTAAAAAATACGTGCTTCTCGTCTCCCTCGGCCTGAAAATAATAATGCATGTCTTGATTGGCTTGCTTTG
ENSMUSG00000021071	Trim9	E001	0.0197305	-0.0541972					CTGGGGAGAGGACTCAGATGGAGCAGGCACTTTAGTGACTGAGAAATCACGGCAGCCCCTGCTTTTCTTTCTATAAGGAGCAAGGATGATGATTCACTGAACAGGGCTAATAATGACGAAAGGTGATCAGCGGTGTCATGGTCACATGGAAATAACTGTGTTGTTCAGCCGCTTAAAAAGAGTCGCTGGAGCCAGGGACACTGTTTTACTAGGCAGCACAAGTTTGTGGCCATTTGAGAAGCAGGCTCATTAAAG	CTCTCATAAAAACGCTTTATTGGCATACCAGGAACGACCTTTTTATTTTAGTACAGTATGCATCTATATTTGTATGCATCTATAGTTGTAGTTCAGTTGTAAACTATTTGTTACAAGTCACTAGAACTCTAACCTGGGGGATGGATTTAATAAAGAGAGTAACTAGCGGCCCAGCCATGGATTCTCATTGGAACAATCAAAGACCAAACAAGGATAGTCCCACAACAGTGTTCTGTAGACACAGGAACCCGAGAC	CTGGGGAATGAGACTATAAGCTATGCAGGGCACCATGCTTACCCTTGCAGGGAACGCCAGTGTGGTTTGTGTGCCCTCAGTTCAATAAAGGCCTGTTCACTTCTCTTGAACATCTATCCTAGAAGACATTGAAGGGTCTTCTAGCAGGATACTAGCTGTGCTAAAAGCCTGGCCATCATAGTGGCCTTCCAAACCCAGGATACACAATACCCACTTTTAAAAAAAGGTTGGGGGGAGGGTACGTTTCTTATGGCT
ENSMUSG00000022577	Ly6h	E023	0.0198064	-1.37401					ATCCCCCAGGAATCAAAAGCGCGCGGGGGGGGGGGGGGAGGTCCAGGAGCTCGCAATGCCCCACCCCCAACCCATCACCGGGAGCATCCACCATCACAGCCTCCCCTCCAGGGAAAAGAGGTCTGCCCTCTCCGGTGAGGTGGCCACCCGAGGTCCCCGCAGCCTTCGCCCTGCACCTGCGTGGGGAGATTGTCTTCTCTCCCCAAGGAGCTGTAGGTGCGTCCGGACAGGAAAAGCGGGAGGAGGGAGCGCACC	TGCGGACCGGAACCGGGGCGCAGC	TTCGTCTTTCGGGGAACGCAGCCGCAGACGCGGACCCCGCGCGAGGGGCGGGGCGGAACCGGGGCGGGGGCCTCGCACAGCTGGGAGACGCGCGGGGTGGGGGGCGCCCAGGGCTGGAGGCCACTCAGCAGGTCGCCCTACCCGGCCTCGGCGCCTTTCGTCCGCGCGCAACGCCCCTTCTAGGTCTCCCGCTCCTGCTCCCGCCGCAGCAGCCCCCCACCCTTTTCCACCTCCCTACCCGGCGTGGGAGGATCC
ENSMUSG00000028289	Epha7	E030	0.0198149	0.172557					AGCATTGTACATATATGTAGCAGTTTTCTTCTTGCTATTCAATTGAAGGAATGCAATTATATCTCTACTAATTCATGCTCAGAATTACTCCCAGAATCCAGCTCACTGGACATTTCTGTGTGACACTGACTTCCTGAACTTTCTCCTGGGTTCCCAAAACAATTTTCACTATTACAATATCCCATGTTTCCAATTATATAATTTACAATGCCCAGTGTTTCAGGTAACATTCCATTGCCTTTTAAAATAAAATCT	GATGTGATGAGTTTAGGGATCACACTGGTTGGCCATCAAAAGAAGATCATGAGCAGCATCCAGACTATGCGGGCACAAATGTTGCATTTACACGGAACAGGCATCCAAGTGTGACACATCGGCCTCCCTCAGATGAGGCTTAAGACTGCAGGAGAACAGTTCTGGCCTTCAGTATACGCATAGAATGCTGCTAGAAGACAGTTGATATACTGGGTCCTTCCTACAAGAAAGAGAAGATTTTAGAAGCACCTCCAG	CTCTTTACAGGGAAAGGGGAGACGGGATGGAAAAGACACAGCACAATAAGAAGTGGATGATTGCATCGTGCTCTCGTTTGTAGGTCTCTTTTCCTAATCAACACTATGATTTTGAAGTACGCGTACACGAAGCAAACGGGAAGAGATAAGGAATTAGCATTGTGAACCTGACTGTAATCCTCTCTTCCGGAAAGAGATGAGATGCTATTGCGATGAGAATGTACAACTTGCACCTTGAAATCTTTTTTGATAATT
ENSMUSG00000037331	Larp1	E024	0.0200411	-0.0718421			recognized	213	ATCAGTTTACATACCTGTAAACTGGGCTTGTTCTTAACTACTCTGGGGAGGAGATGTGTGCTAAGGACCAATGGCTGGAACTTAGTACCTGGAAAATAGTTTGGGTGGCATTTGGTGATAGTAGGGCAAGCTGAATCACAGTCTTCATTGTTGGCTCACGGGCCTGGTGAAGGCTGGAATAAGACAGTTCCCTGTGGAGCCAATACATGCACCATGTAGCATTCCACACACCACAGGTCTTTTCCTAAGAGACCC	CCCCCATGGGCGAGGAAGGCAACCACAAGCGACACCCAGTGGTAGCAGGAGGCAGCGGAGAGGGCAGGAAGCGGTGCCCTTCCCAGTCTTCCAGCAGGCCTGCCACTGGGATCAGCCAACCCCCTACGACACCTACTGGCCAGGCCACTCGAGAAGATGCCAAATGGACAAGCCAGCACTCGGACACACTGACTTTGCGAAAGTGAATGGCCTGAAGCCCCCTGGGGTTTGTGATAGAGGGGTGGGGTGGTTGAG	AAACACTGGCTGGTCTCCCATCTGGGACACTACTGTTGGGTGTGACAGAGAAGCCTGGTGTGTATCCCCAGATGGAGGTTCCCACCCCCTACATGAGCATGACTAGAGTACATTCTCTTAAGAGCCTTTGGCTCCTGGGCATCTGCCTGAGACAGTGCCCTTGGTGCTGCGAGTGAGTTTGGGTGCTTGGCCAATCTTGAACAACCTGGACCCTGCATGCTGTAAAGCTTGAGAAAGGGTGGAGTTGGGTTTTCA
ENSMUSG00000059401	Mamld1	E003	0.0202091	0.153117			recognized	170	TATCTGTAGCTAAGTAGACATTGAAATTGTTCAGCTCGTTCTATTTTGCACCTGAGTGCCTGCCTTTGGCAACAAGTTCATTTTGTGAGCTCAGCATAGCCCCTGAACTCCCCTTTAAGTGTACAATGAATACCCTTTGTGTGACTTTCAGTCCTGTTTAGTATACAGACAGCATATTGCTTTATTTGAAATGTAACAGGGCTGTTTAAATGAGACAGAGCAACAAAGAAACAAAAACCATGCTTCCAAAAATAG	GAACCAGTAAGAGAAGACAGGAAGGAGAGAACTTCCACTTCACAGGCATGGCTGATGGGAGCTATCCTAATAAAATCAAGAGACCTTGCCTTGAAGATGTCACCCTGTCTATGGGCCCAGGTGCCCACCCTACTTCTCTCTCTACAGAGATGCAGATGCCCACATTAAACATGAATCCCACTTCTGCAGACCTGGGAGTGGCTGGCCAATCATTACTCCTTGAGAACAACCCTCTGGACAGTAATGTTGTGAATA	GTAAGGCTACCTCCTAACTGGTAGTGCTCCTTTGGGAAATGAGAACTATGTGAGATGTCATACAAACCTGGCTTTGGCAGGCAAATTCAGGCTATTATCCTCACTGAGGCCAAACTTGACCCTGGAAAAGCCCATGTAAGTTAGCTAATTGCATGTAGTTAAATAGAATGTGCATGAGGCCAAAATTATGATTCCAGGCCCTGATCAGCTCACTTAATTCTCCTGAGAAGAAAGCTTCACCCATAATCTGTGTCC
ENSMUSG00000058624	Gda	E001	0.0205117	-0.0373788					ATTTACTTCATGGCAGACAGGAAGCTGAATGGAACAGTATTAGAAAGAGGCCAAGACAAGAAATGACCCCGAATAACACGTCTCTAGTGACCTACATTTTCCCATGAGGGCCTCACCTGCTCTTGTTCCACCCCTTCCAAATACTATAGTCTACATTTGTATTTGTCAGTGTATTAAATTGTTCTTTAGGCCACGGTCTTCATGATCTAATGATCTAGTCATTACGTGCACTTCCTTATCGACACAACTAGAACA	GGAAACACAAAATCTCATTTAATTTTTTTTTCCTGATGCACAAAGGAGCTCACCCAGTACATTAACAATAAGCAAAATCATACAGATACCGAGGGGAAGGATGTCCCCTTGACTACATACACATATATGTCTCTATCCTTAAGAACAGCAATCAGAAGGTTAGCAATAATGTAAGGGACACCTTCTGATGGGCTTTTTGGGTAAGAAATAGACAGATAAGTCACTGCCAAATAACAGAAATTCATAATGATTGGT	AATCTTCAAGAATTACAATGACAATTTGGTAAATTAAAACAAACGAACAAACAAACAAACACACACAGAGCTCTTTCAGTATACTGGCCTTGCAGAGCCTTATCCATAATGCTTTAGGGACTTGCACTTGGCTTTTAAGTTCTAGCACATTGATAGGAGGGTGAACTGTACAGCAATGATTATGCGTTGGGTAGATTCAGCATTGCAAAGAACCCTGTCCCCTCAGTGTCACCAACTCCGGGGAATATAGTACTT
ENSMUSG00000045589	Frrs1l	E001	0.0205481	-0.0467866	recognized	484	recognized	157	CACATGCAAGTGCATGGAGCTCAGAGGACAACTTGTGGGAGTTAGTTCTCCTTCTACCAGGTAGCTCTGAGGACCACGCTCACTTAGGTCATGAGGCATGGCAGCAAGCAAGTGCACTAACCACTGAGACACCTCACCAACCCCTCTACTTGTTCTTCAGTGAAACTAAGCTTTAAGTAAGGACTTTTAAATTGAAAGTCTTAAAACCAGATATTTGCAATAAAATGGCTGATACACTTGAAATGGAATTATAGA	AAGGAATTATAAACTAGTTTTAATTATATCAACAGGAAGATTTTCAAATCATGTTGAGGGTTTATGTTTTTAAAGTTTCATCTTGGTTAATATAGTCTGAGTATAACTTAACATTCTAAAGATAAAAGTATGTATGGTGGCCAATGAACAGGATCATCACTCAGATAGCAGTTAGGAGTGTTGCTACAATGACTTTACATAAATAGAAACTCATATCTTTATTAGTAATGTGCCACACTTCTTAGAGTAAAAATC	CTTTCTTTCTTTCTTTCTTCCTTAAACTGTGTTTCTTTCCTCAAATACAGCTGTAAGAAGTTCTCTGCTTGATGTGAAGTACCAGGAGGCAGGCAAAGGCAACCAGTTGGTTTAAGTATGGATAGTAGGTTCTATTTAATGGAAGTTTTAATGACTCTGCATGAGATGGAGAAAGTCATGTTGCCTCCCTTAGCCTAGGCTGTCTCTTGCAAGATAAGTGCATTAAACTAGTGTACGTTTTTCTGCCACTTATAC
ENSMUSG00000061601	Pclo	E007	0.0206316	-0.0811729			recognized	111	CGTGCCCCTTAAAAGGCAAGTTTATGACAAATTAGTAAAATAAAGAAAATGTATTTCGTGAGCTACCAGCTGTTGTTTTACCTGATTGAAACTGGCTCCAATAAACTTTTATGGCAACAAATTATTTTGGCTCTTACGATGTTGCCAAAATAATCATAAGAAAGTAGAGTTGCCAAGGAATACCAAAAGTTAAATAATCATGTAAATACTGGAAATGGCAAGATATGTGCAATGCGAAATCAGCAGACTAGACAC	CTAAAGGTTCCCAAACAACCTCTGGTACTCAGAAAAAAGTGAAGAGAACACTGCCAAATCCCCCTCCTGAGGAGGCGTCCACGGGAACACAGTCAACTTACAGCACCATGGGCACTGCTTCTAGGAGAAGAATGTGCAGAACCAATACCATGGCTCGAGCCAAAATTCTCCAGGACATAGACCGAGAGCTTGACCTCGTGGAAAGAGAGTCTGCCAAGCTTAGAAAGAAGCAAGCAGAACTTGATGAAGAAGAAA	GTAAATGGCTCCGCACACTATCCTGTTGCTCTCAAAACTCAAACTCTTCTCTTTCTGCATGTTTAATTTTCCTTCTCCAGGGATGTATTCCATCTTTCTTGGTGCCATTTGTGCATGTTTATTTCAGTTTTATTTCTTATATGTTTACTTCTTGTGTGTAGATATGGTGGCATGTTTTTCTTTGATTGTTTTTATTTTATTATTTTACTTTGTTTCTTGATTGTTGATCTGATTTGTTTTGTGTCTGATTTATTT
ENSMUSG00000020850	Prpf8	E009	0.0206997	0.396549			recognized	481	TACCACATCACTGGAGCCATCTCCTTTGTTAACGAGATTCCCTGGGTTATCGAGCCGGTTTACATCTCCCAGTGGGGGTGAGAAGGGCTGGAGTATGGTGGGAGGTGTTGGGCGCTGGGGTGGGGTGTTGCAGCTGAGATCAGTGGACATGATGCTCTTGCATTTTAGGTCAATGTGGATCATGATGCGTAGAGAAAAAAGAGACAGGAGGCATTTCAAGAGGATGCGTTTCCCCCCTTTCGATGACGAGGAACC	TACGTTAATGGTTCCACCTACCAACGCTGGCAGTTCACATTGCCTATGATGTCCACACTCTACCGACTGGCCAATCAGCTTCTGACTGACCTTGTAGATGACAACTACTTCTATCTCTTTGATCTGAAGGCCTTTTTTACCTCTAAGGCACTCAACATGGCCATTCCTGGGGGACCCAAATTTGAGCCTCTTGTTCGAGACATCAACTTACA	GTAAGTTGGGAGGCACCTTGTGTGTGTTAAAATTTAATATTTATCTTAAGATCCTGTCTAACAGTGGAACTAGACAACTCACTTGACTTTCTGTCCTAGGGATGAAGACTGGAATGAATTTAACGATATTAATAAGATCATCATCCGTCAGCCTATTCGTACTGAGTACAAGATTGCTTTTCCTTACCTGTATAACAACCTTCCACACCACGTCCACCTGACCTGGTAAGACGCTTGCAGCATGGCAGTTAGAAC
ENSMUSG00000003234	Abcf3	E001	0.0208484	0.98143					AGTTGAACACCTATGAAGTGTGAAGGAACTGAGGACAGAGCAAAGAGGCAAGCAGAAGTGTGCTCCTCACCCAGCTGATTCAACTAGCAGGACTAATTGAAACTGATCCACTCTGGACCGAGAGTTGGCGTGAGTCAGCAAAACGCCAAAGGTGGGCGAGCAGCAGCATGCGCCTGCGGGGAAGGTATCCAAGCTGTAAAGCGACCCCCTCCCACGTTAGCCCGTGTCTAGGCATTTCTCCCCTCGCAACACCTC	ATGAGGGGTGCGATTTCGGGGTGGGGAGGAAGGGCAGGGAGGCGGTCCTAGGCCCAAGTCTCACCACGACTGCGCAGATTGGATCCCGAGTGAACATGGCGACTTGCGCTGATATCCTGCGAAGCGAGTTCCCTGAAATTGACGGGCAGGTCTTCGACTACGTGACCG	GTGAGCGAAACTGAATTAACTGCCTGGGGAGGCCGAAGTGGAGGTTGTGGGGAAAGACTGAGGGCGGACAGTGCAGCAGACCGCTATCTGGTCTCTCTGCGTGACCTCTTATCTTGAGGGCCAGTGGGGTCTGGTGCCCCGAGTGAGCTGTACAGACACTGAAACTGCTCCTATATCCGCCCTACCCGTTGTCTGTCTTGTTCTGCGGTACCCGGCTCAGGTGTCTTGCACAGTGGCAGCGCGGATTTCGAGTCT
ENSMUSG00000027439	Gzf1	E012	0.0208484	-0.117107	recognized	72			AGTCTACTCTCCGGAGGCATACCTCAGTAAGTGATGAGTAGCCTGCTTGAAAACAAAGCCCTTCTGGTCAGTCCAAAGGGTCAGAGGTGGTAGCAGGTTCTCTCTTTGGGTGTCCTGAAGTGACATCTAGCCAATAAGGTGAAGGACCCCTATGGCCAAGCCTATGGTAAACACTTGCAAGCAGTAGCTGCTGAACAGGGCAGATACTTGGTAATTAGTGCACAGATTTAAAAGCCAGGGAGATCTTTTGTTTAT	TACATGATAAGAATACGCCGTGGAAGTCTTTCCTTGTCATTGTAGATGGCTCACCCAAGAATGATGAAGGGCATAAGACAGAACAACCCGATGATGAATATGCATCACCCAAACTTTCAGATCGATTACTATCTTTTGGTGAAAATAGCCATTTCAACAACTTACTGGAAGTCCAAGGCAATGTGCCTGCCGTGCAGGAGAACAGCTCTACAGGCGCTGCTTGCAAAGCAGTGGTGTCTCAGGACGCTCTGCTTA	TAATGTCTGCTTTGTAAAAGTCCTTCTAAATTTATTTACATTATAACTTAAGGTAGGATCTAAAGAAATAGACTCTTTTAGTCTAATTTGTTTAATAGCATGAACATTAAAACTTCAAGTCAGGGTCTTCTATTTATAGTCACCACAGATGACTGACTTACATTCCTGAAATCAACAGTGGCACACACAGGAGAATGGCCTCTGCTCAGCAGTGGTCAGTTTTGATCTGGGCCGCGTATAGCATAAGGGCTCGCA
ENSMUSG00000034187	Nsf	E001	0.0209291	-0.0527483	recognized	273			TCAACCACAACCTTGCTTTTGTTGGTATTTCATAACTGTAATGTTGCTCCTGTTGTGAATTGTAAGGTAAATACCTATGCTTTCTGATGGTCTTAGGTATAACCCGTAAGTTGAGAACTACTGTCCTACAGGGTCTTGGGACTCACTATGTAGAGCAGGCTGGCTTCCAACTCAGAGATCTGTCTCCCAAGTGCTGGGATTAAAGGCATGTGCCGTCAGCTTGCATGCGTATCTGTGTGCCATGTGAGTTACAGT	TTCAAGTATATTTACTCTTTATTGCATTCCTTCAATTTGCATTACACAATATAATATCTTTTTCAATATAATTTTGGACAAAAACACAAGACATTAACTTCGTTGAACAAGAAACATAAATTAATTCATGTAGGACTTTGTTGGGAGGAGAAAGGCAGAACTGCAGACAACAGGGACCACGGTGGTGGACAGGGAACCACGGTACTAGCCACGGGAATCACAGTTTCACAACACAATTCACTCTTTCAAAGCCAC	TCTTGGTCTCATGTAGAAGTTGACCTTCGGGCAGGTGGTAGGGATCGCGGTGTGGGCAGCGTGCACGGGTGTGACATGCCTCCCACATAAGCAGGAACCATCTTAGCTAGCACGGGAGGGAAGCCCAGCAGTCCAGGGAACACGAGAACATCTCAAAAGCACGAGGGAGTTCACTGCACTAGTCATGCAGAGCGAGTGTGTGGAGAGAGGCGGACACTTCACGTAGTCCAGTGTCTTGAGTGTGAGGAGTGACGA
ENSMUSG00000024073	Birc6	E009	0.0210062	0.212279					AAATGAAGTCCAGAAATTCTATTCTTTTAGCATCAATTTAAAGCAATAACTAAATAATATAGTAATAATTTGCCATGACTTAAGAATCAATTTCTTCTCTACAAAATGTATTTGAGTTGAAAATAATTTTGAATTTCTTGAGTAGTCTTTTTTTAAGTTTTCATATGTAAGGTCATCTGACATTTGATTAAATTTCTTTTAAAATATTGGATATAAAAATATTTAATTTTTGTGTTTCCATGTATGTATTGGCAC	GCATACATCACAGAAGGAAGCCATGGAAGTAAGCCTTGATATAACAGCTCTCAGCATTCTCCAGCAGCCAGAAAAACTGCAGTGGGAGATTGTGGCTAATGTGCTTGAAGATACTGTTAAGGATCTTGAAGAACTTGGGGCAAACCCCTCCCTAACGAACTCTAAGAGTGAAAAGACAAAGGAAAAGCACCAGGAACAACACAACATTCCCTTCCCCTGTTTATTGGCTGGAGGTTTATTAACATATAAGTCTCC	GTGAGCTGCTTGCTTGATTCTTCTGAGAAACCTTTGGTGGCATTTGTCTATGTACATTATCTAGTGTGAATTTTAGATCCATGTAAGAGGTTAGTTTTTCTTTCTAGGAAATATTGTTTTTAATGCCTTTAAACTTATTTTTTAAACTTTCCTAGGCAAGAAATCTATTGTAATTAGCTTAGTAAGTCCTCAGAAAGTATCTTCTCAGCTGAGTGTAAACGTTTACTTAGGATGGTGAAACTCTAGGGTCATGAG
ENSMUSG00000007617	Homer1	E010	0.0210379	0.314572	recognized	293			AGCCTGGACGGGACCTGAAGCAGGACCTGAAGCAGGACTTACAGATGAACATTGCGACTGCCTTGCCTAGCTTACTTTCTGACACAACCCACAACCACCTGTTCAAAGGTGGCATGGCCAACATTGAGCTGGACACCCCCTGCCCCATGAATCCTTAATCAAAAAATATTCCTCAGAGACTGCATCCAAAAGCCAATTCAATGCATGCAATTCCTGAGTTGAGGTTTCCTCTTCAGGTGACTCTAGTGGTGTCGA	GAGCAACCTATCTTCAGCACTCGAGCTCATGTCTTCCAGATTGACCCGAACACAAAGAAGAACTGGGTACCCACCAGCAAGCATGCAGTTACTGTATCTTATTTTTATGACAGCACAAGAAATGTGTATAGGATAATCAGTTTAGATGGCTCAAAG	GTAAGCTACATTTACTTCAAATAATCTTACTCTCTTGCTTTGTACAACATAGAAGTTCAGTTTCATTCATATTTCTGTTTTCATTAAAATATTTCTTCTAGACTTTTTGAAGCTTAACTTTAGAAAACAAAAAGTGATTATTCTTAGAGTAATAGCATTTTCCCCTCAAGTTATTTGTAGAAACTAACTCCCTTATTATATTGAGTTATATGAAGCAACATAGTCTTCAGCTTTATGATGGGTTAGTTTATTTAA
ENSMUSG00000024576	Csnk1a1	E028	0.0215286	0.271346					TGGTAATAGTCTTCATTCTGCCCGTCCTGTAGGAACAGAGAAGCTGGTGCCTCCTTTCTAACTGAGGTTACAGTGAAGATGCGCTCTGGAACCAGAGGTGCCGCCCAGACTACAAGATTTTAAAATCAAACAAAAGACTAAAGCACACTGGAAGAGAGTGCTTGTTAGTAGTTGAAGATTGGATGTTGGCCTGCTGAGATGTTTTTCCTTCTTGAGTACTATCAAAGGACAGCTCTTTGGAGAAAGGATGCCTGG	ATGAAGAGATATTCAATGTGACAATCAAATTACTAAAATACAGTTACATGATTACAGCAAATTATGATAAGGGGGGAAACCCTAGGTGTAGTAGCTGGGAAATCGCCTTTGTTTACAGTATTTATGAATAACTTTTTAATACTTAGAGCCATATCCTAATGGGGTGAAGGCCATTTTTGTTTAACTAGTTCATGGTTCCTTGGATTTAATAGCTTCTTAGCCTGTGAAATCAGAATTAGATCACAGGTGTGATAG	AAAATTTTATATATCCCATGAAGCCCAAAGGAAAAATCCAGTGCTTGAAGAGGAAAGGGAGGGGGAGCAGTATATTACTGACAGAAGCGTGGGGGTTGTCATGCTAGTGGTTTGCGTGCTGGTTTTGTTTTTAAAAAGTCAAGAAATGGTCTGAAATGTATGAAATGTAGTTAGGTCACCTCAGGTTTGGAAGGGAATAGACCAAATGGCCTTTATGGGATGTTTGTGTTACTAAGAGGTAGACTGTTTATTCTG
ENSMUSG00000027312	Atrn	E037	0.021914	-0.0392367			recognized	273	CTTTAGAAGACACAGAGATGGAGCAGGTCTTACATGGAGATATAGCAGCTTTTCCTTCCTGACCCTTGACCCAATGCTTCTTTGGAAATCCTCATGAAACCCTGCTCCTTTCTGGAGACCCACCCCACAGCAGGGTTATCCATGCCAAGCTTCCTGTACTTTCTCTTTTTGAGGAAGCACATACACACAAAGTTTTAGTAGCTCGCACATCTCACTGTGAAGTAGTGATACTTTCATTGCTATCTTCTGGAAACA	TCTCGCTGTGGCCAGTGCCCTGGTGGACATTTCTCAGCAGATGCCAATAGTGTACAAGGAGAAGTCAGGAGCTGTAAGAAACCGGAAGCAGCAGCCGCCTGCACAGCCTGGAACCTGCATTTGATACTGGGGCAGGAATTCGCCCTCACAGAGGGCGTGTGGTCCACGAAGCTGTCTACAGGGGAGGCTGCAGGCAGGAAGCAGGCGTGGGGCAGAAGACTGGGGACCCTTGAAGCGTCCAACTCATGTGCATGA	CGTGCGTTTCGTTCTGAATGTTCAATGCTAATTTTGTTTTATTTTATATTTACATTTTAGTCCTTATTTTAGCAGTGAGGAGACAGGCACAGCAGTGCATTCTCACCTTGGCAGCTGAGGAATCCCCTAGAGTAGACTGCAACTCAAGACTCTTGGCTTCCACACTGAAAAGAGTTTCAGTTTATGAAGCAGAGTTTAGGAAGTTTAGTGAGGAATTTAAGGACTTCTTTTAATGTTTGTGTCTACATATGTGGG
ENSMUSG00000028207	Asph	E028	0.0220024	0.395484					TATTTCAAATCTCTTCATAGAAAAGCTAAAAAGTTATTTTTAAAATTTAAAGTCTTCTTGATAAAATGTTTTATTCTATTATCAAGTTACTTTTACTATTGGTGTGTGTGTGTGTGTGTGTGTGTGTGTGTGTGTGTGTGTGTGTGTGTGTGAAAGAGAGAGAGAGAGAGAGTGTGTGTGTGTTTGTGAAAGAGAGAGAGAAAGAGAGTGTGAGAGAGAGAGAAAGAGTGTGTGTGTGTGTGTGTGTGTGTGTGT	CTCAATGATATTTCTTTTATTAATTGTTTGTGATGGGCTAAGAAGTTTGATCTCAAATTTGCGGTCGTCTGGAAATGATAAATAATCATGATACAAACATAAGAATATATGCCAGCTAACCACACCTGAAACATAAGAATATAAGCCAGCTAACCACACCAACTGAAACATAAGAATGGAAGCCAGCTAACCACCACTGAAAAACAGTGAACCACACAAGTACCGCAGTGAAGCCAACGTCTTTGGATGATTCAC	TTTTTTTTTTTTGAAACTGAGAAGATGACAAAGTATACTTGATTCACAGAATTTACTTATTGAGCACCAATAAACACATCCAGTGGCTAATATGGATCATTTTCCCAGTCGGAGCAATCCCAGATTTCCTCTGCCCTTTAGCAGCGAACTGGAGTGAGGAAGGTGAGTCATTTCTGACAGGCCTTCAGTTCTTTCTCTTCTGGCCATTTTCCTTGGCGACGTGAGCATGCCCAGAGGAGCTTCTTCCTCGCCTGT
ENSMUSG00000074657	Kif5a	E001	0.0220265	-0.0555711					GTGGCAGCAGGTAGGGAGGCCTGTTCCATCATGTTGGAGGGGTGTGTGTGCAATAGCAGCTTGAAGTTTACATCATATCCACAGCATGAGGAGGCAGAGAGCACTATCGGAATGCTATGTGGCTTTGGAACGTTACACAGCTCCTCCAAGGCCACACTTCCTAATCCTTCCACAGACTGAGGGACGAGTATTCAAACCTACAGAGCCTCTAAGGCCCGTCCATTGTCATGCAGACCACCACCCTGGGCTAATGCG	GTCATCGAAGTTATTTTATTTTAAAGATATTTGTGTCCACCAAGTAAATACACACTGGGATTTGTGCGGTTTGGTTTTGTCTTCCACGCCGGCATGCAACATTTCACTTTGGCAGATGTAAGTGGGCGGGCCAGGGGCCCTGGTGGTGGCCTGGCTCTCTGAAAGGGATGTAGTGAAGGTAAGGGGGAGGATGTGGTGAGAACCTTCCGGTGAAGGGCTGTTTCTTTAGCATAGCAAATGGCCGTGTCCCTTACA	CTGGGGAAGAAAGAGAAAGAGGGTGTGAGGAGCCAGCCCGGCCTGGCCTCTGTGTAGGAACAGACAACATAGAACACCACGAAGCCAGCCCCACCCCCCACTGCCAGCCAGTCCAATCCATGTTTCTCCACCCCAAGTCTTGCCAGCATCCTCTCCCCCTTAACACATCTCTTTCTCTCCTGCTTTTCTGCCTGAGCCACTGTCCGGGGAAAGCCTGGGAGGGACGCGGCCTCGTGCATCTCAGCAAGACTGGAC
ENSMUSG00000033066	Gas7	E037	0.0223394	-0.0391107					TTACTGTCATTGGTCAGTGGAGCAGATTCTCATGGCTGTAGGTAGTTGCTACACAGGAAGCGAAGGAACTTTGGGGAGTCACAAGGTGAGTGGGTAGGGGGGTGAAGAATTCTAGCTGGAAACTTGTACGGGGGTGAGGGGGGACATTTTTTCTCATCTTTCCCACAGATGACTCTGTATTTGACCTGTCTATCTTCTCCAAGGGCAAAAATCCTCTAAATGCCACTCACATCTTTCAGTCTCACAATGCACATC	GCTAGTGGTAATTTGCTTTGTGGCTTAGCAACCTAGTTTGTGAGTGATGGTCAAGCTCCAAGTCTTGTCATACACAGGGGGTTGGGTATCACAGTGTAGCTCATGACTTTGTTCCCTCACCCCACCCCCAATCCAAAAGGTTCAGAGTCCCCCGAGATGACACTTCCTCCAGCATAACCCCAGTTGGCTGACGTGAGCCTATTCCATCTGAGGCCATTCTCTCTTTGGTTCCTTTCTAATCTATCCACACATGCC	AATTTCAGTGCCATCCTTCCTTTTTCCTCCCTCAGTTACGTGGACACTTGAGATGCTTATATTCATCCCACAAAAAATAAACTCTCCAGAGATGATGGGTCCCATAGGGACCCTCTTTCCTAGAAGGGCACCCACTTTTCCTTCCTACGAGAGGTCTCTACCTCCCTCCTGGGCTCTACACACCAGTGATGGGTTCAGTCCTGATGACAGCAGAAGGACAAAGGACACCAGGACATGAATGTCCACATGGACACA
ENSMUSG00000022324	Matn2	E016	0.0225255	-0.856782			recognized	247	TGAGACTTTTTTCCTACCGTCCAGAGGCCAATTCAGGAGTACAACGAATATTTGTTACTTGAACCCCCCTTGAGAGCTAATCAATAAATCTGTGCCTTAGGGCTGGTGAGATGGCTCAGTGGGTAAGAGCGCCCGACTGCTCTTCCGAAGGTCCAGAGTTCAAATCCCAGCAACCACATGGTGGCTCACAACCATCTGTAACAAAATCTGACTCCCCCTTCTGGTGTGTCTGAAGACAGCTACAGTGTACTTACA	TATCACTATGTATGCCGTTGGGGTAGGAAAAGCCATTGAGGAAGAACTACAGGAGATTGCCTCTGAGCCCATTGACAAGCATCTCTTCTACGCTGAAGATTTCAGCACAATGGGCGAAATAAGTGAAAAGCTGAAAGAAGGCATCTGTGAAG	GTATTATAGAATGTGTCTAAGGTAGACCTTAGTTAGCCAAAGGGCAGCATGAACCCCAGAGAAAAACCTCAAACCGTTTCTTCAGTGCCCAGAAAAATGCCTCCCTGCTGACCAAGTGATACCTAAAAAGGCACTGCACCCAAAAAAATGAAGAGGGAAGACAAGTGTGATAGCTACCATGTCTTGCTGTGCCAAATAGCATACTAAACTTTTTTTTAAGATATATTTTATGTATGAGTGCTCTATCTGCATGTA
ENSMUSG00000062257	Opcml	E024	0.0225969	-0.0371035					AAATGGGCTAAAAAATGTCCCATGATAAGTACCCTGATGGTACACCTTGGCTCACAATGCAGTACACAATAAGAGTTGCATCTACATGTCCTATTTTCTTTGTCCTTTAAGCTTTCAATAAGACAGTTTTAAAAGTGCATATCCTTATCCCCATGCTAATAGCACCTATCCCATTAGGCTTCACATCTTGTCTTTCTAAGAAGCTGCCTAACTGCATCCTTAAATGTGTACACACATACAAATATATGTAAAAAA	TTGTGGCTCCATCTAGTTCTACATAACCTGTCTTTTTCTCTTATAATCTATTTGATCTATTTAACTAATCATTCTTTTTCTCTTCCCACTACACACTATCAATTCATCCCATATTAATCTCTAATCATATTGTGTCTATGCCACTATCTCCATATCTCTACTACCATCAATAGACATTTCCACCTTCAAAATTGCCTAGCAACTTCTTATGTGAAAGCCAGTGGTCTTGCAGGCTAACTACCCAGAAGAACAATT	TAGGGGACTCTTCATTAGGATGTCCCTTAGAAATCTCACAATGGAAAAAAAAATGAAGCAGTTATGTGTTTCAGACTTTGGAGAGTCAGTGTGATCAGGAATATGAGTAGGGCCCCACCTGTCTCCCTCACCCTTTTTCCTCTTACACACACACACACACACACACACACACACACACACACACACAGGGCGGGGGCAGAAAGGACTCTTCACTTGTATGACTATCAAATAACTTTGCTATTTACAAACAACAAA
ENSMUSG00000022048	Dpysl2	E001	0.0226402	-0.0649972					ACCAGCATCCTCCATCCTGAGCTGATGATGGAAGCCTAGGCCTTGGTCCTGGTTTCGACAGCACCTCCACTGAGGTGTCGGGACACTCTAGGCAATCTCTTTCTCCCCTGCACCCATGTAGTGAGAAGATTTCCCAGAGTAAACACATGAGAAGCAAGCCCAGCACCTCGACTAAAACCCCACCTCGCCTTCTGTGGCCCCACTTGAACCCCAGGTTCAAATTTGGCTTGGCACTCCGGGATGCTCACTGCCTTT	GAAACAACCACATTTTGCTTTATTGGGTGTTCCGTGGTAATATAACACAGACTTCTTAAGGAATAATAAACACGAGACTTGTATTTTACCATAATTATTTTGCCATTAAGACAGTGGTTACAAAAAATAAAACAAAAATTAAAAGAAAAAAAGTACCTTTCTGGCTACACACATGATCAGCTTTAGCACTGAAAGGTCCCCCCTCATGGGTCACAATCACAGGTTCAAGGGTTCAAAACCATCTAGCGGTAAATC	CTAGAGAAGAAAGAAGAGACAAGAAACGAGTGAGCGTGAGGGTCTTTAGAAATAAAACCAGACTCCTGTGGTATGCCCAGGAACAATCCTGGGGGGAAAAAAGCTGAACCAAGCACACATGTCCCGACCTCTTTCTCCAAACCTCACTAACTACAGGAAGTTCAAACTACAGGAAGTAGGAGGGCCTGCCTTCAGCCTACAAGTGACTTCCTCTCCCTGGGGAAGTCTAGACTCGATGCAAGGTACTAGAGAGTA
ENSMUSG00000031422	Morf4l2	E013	0.0226402	0.354795					TTTATTTCTCTACAAAAATGTGCTTTTATATATACATAAAATGTTTCATGACTATTAAAGCCATATAAGTATTATTACAGGAAATACTTTTATGAAGACATCTTGGAACAAAGGAAGTTTCTTGCTCAGAATTACACAGAAAGTCGAAGAGCCAGCAATCAAATCCATCAAATCTGTATTTGCTGTAGAGAAAAATAATGTAATATTTGGAAGTGTGAAGCCTTCATAGAGCACTAATTTTTAATTAAGAGAATA	TAGAAGGTCAAACAAAGAGATGGAAAAGGACATAAAAAGATATGAGATGGTGACTTTCCTTTCCATCAGTAAATAAAATTTTATCTCACACAAAGGACATCAAAGCTGATAATGTAGAAATTCTATTTTTCTTGTAGTTTTATTTTCAGATAAATGTACTTTCTTGTATGTTTATCAATTTTGGAAAAAAATTAATTAATTTCTATTAAGGATAATGTGAAATAAATAAAATTGTAAAAGAACAGCAGTACAAAC	TATTTCTTTCCACAAAATAAAGCATTCTGAAAACAGAACCACATCGCCACCATAAGCATTAAAAAAATTAATAATTTGACACCGATTTCATTGAAGAATATTAATCCTGCATTTAAAAATCCCCGATACGTCTTCAAGAAAATTTTACAATTGGTGTGCTCGAATCAGGATTCAAACAAGGCCTACTCCTCGCATGTGCTTCAGGAGGTCGTTCTCAATCGCTTTCCCCCCCTACATCCTTTTTCTTTTTGACTT
ENSMUSG00000021488	Nsd1	E023	0.0228039	-0.0563228					AGTTAACTATTTAAAAGCTGTCGAGCTCGGTATGGTCATACACTGAGAAATGTAGGTGCAGACAACCCTGGCTCCATGGTGAGACCCTGTCTCAAATAACACAAACAAACTAAATTTTTTAAAGCTCTTCTAGGACAAACAGAATTTGCAAACAAATGTGGAAATATTGATAATTGTTTCATCTTTAGAGGAACTTTGGGGTTTGTTTGGTTGGTTTTCTACTGTACAGCCCTTCTTGCTAGAAATAGTCTCTTG	GAAGTGGGAATGTCCTTGGCACCAGTGTGACGTGTGTGGGAAGGAAGCAGCCTCCTTCTGTGAGATGTGCCCCAGCTCCTTTTGCAAGCAACATCGAGAAGGGATGCTTTTCATTTCCAAGCTCGATGGGCGTCTGTCTTGTACTGAACATGATCCCTGTGGGCCCAACCCTCTGGAACCTGGGGAGATCCGTGAGTATGTGCCTCCCACAGCGACGAGTCCTCCAAGCCCCGGCACTCAGCCAAAAGAGCAGTC	TGGCCCTTGCCCTGTGTTTTTATTGTCTCTGGGGAAACATAGCTTAACAAGACAGGGGGCTGACTGGTTTAGGATAAGGGCAGGAGACAGCCTGGGTCCTCCAAGCACTGGGATTCCTCCCAGGTGCACGGGTTGTGCTTAAGTATCCATCCTTTCCCTCTCTACTGAGCGTGGTTGGTGTTAGTTTCAGTGGCTTCACAGCAATCCTCTACCACTCGGTATTTTGAGGAATTATTTTAGAGAAATGAAACCAGC
ENSMUSG00000057182	Scn3a	E002	0.0228039	-0.103202					ATCACAGTGCTTTAAAACACTTAGGATTTTGAAAATCAGTATTTTGCTTCTCTGGTATCAGTCAAACCTGTAAATTGACTTGACTAGGCAGAAGCCAGTAAATGAATCCCATTAGTAACATTTTAGGGCAATTATGAAATACATATTTAGATCTAAGTCTTTGTGAAAGTATTCATTACAACTTGAGTTTTCTGTTGAGATAAAGGTTCTGTATTGAGCTGACAAAACTGTAAGAAACCCTGAAAAGCTAACATA	GCTTTTAACTAGTCTTTATTTTGACAAACTTCTCAGTAGATAGTGTAGCAGGGTGTTACAAAACCCATGTGAACTTCTATGAATACAAATGTCGAATCAAATACAGGTTTTCTTTAGTTGTGTAAATTTTTACCTGCCGATAACTTAAAAAAGAAAATACTCAGTCCAACAAATCAGATACAGTAAAAAAAAAATGAAATATTTATTCTTTTGGCTCAATAACGAAGTAGCTCGCCATTCCCTGCATGCAGTTCA	CTATGGAAAATTAGAGAAATGAGATGTTCATAGGATGTTCATATCGATGTTTATAGGAATGATGTATGTGTGTCCCTCCTTAAAAAAAAATAAACTTACAAAACCCGGAACCACACATTTGACTCCACTCCAATAGTGACATTTAAATGTTTAAGAGTTTTATTAAAATGATTCTATAACACGATTTTATAAAGAAATATAAATTTTTGTAAAATCCAAAATAATATAATTATTAGTATGCCAATTCAGGGTTAT
ENSMUSG00000020716	Nf1	E073	0.0229756	-0.136942					GACCTCTAGGATCGCTGCTGTGCAGAGTGGCTGGACCAGTGGGACTCAGGCCCTTCCAAGGGATGCACACCCAGCTGCTTCATGGTACCCGCAGGATGCAAGACAGTTTGACTTTAGTGAGCACAGTAGTACATGGATGCTCTCAGTTAAGATTGAACTATATTTATTTTTAAAAGGTATTATCCCTCTACTTCCAGGTTCCCTTCATGTATTAAGACATAATGGCTTTGGGAGGGACCAAAAGAAACCCAGTAG	AAATAAAAGGAAACCCCTTAGTGTTAGTAGTGATTTTAACATAGAATCACTGGAGACTACTGGAGACAGATGCAGCAAACTGAGCTCTTGTAAAGGCTGCCTTAGAATAACTGTCAGAGCAGATAACCAAGGCTGGGAGGCTGAGATGCCAGCTGAGTTTAGCCGCAGGAGGCCCGTGGCTTAGCTGCCAGGCCCGGCTCCCCACCGCAGTACTGCTGGGGTGCACCCCGCTCTGGCTCCTGCAACCGTGGGCAG	CTGTGAGGAGTTATTTATCACATGCAGCCAACTGTTTGTTTCTCTCTTCCTCCATGATCTTTAGAACATTAGACCTTGTCCACCTTTCAGGTGTGTTGTGGATTGCCTCTGCTCACCCTAAGGGAAAGATCTTTCTCCAAAAGTAAAGTCATTGAGTTCCAACAAACAGGGGTCTGTCCAACACAGAGGCAACTGTCACTCTGGCATAGGTGAACTTACTTTCCAGAGAGTAGCCTGTCATTACTTCCAGGCTCC
ENSMUSG00000028572	Hook1	E037	0.0229756	-0.41723					TGACTTTGTGGATAATCTATAATTTTTATAAAGCATATTCTTGTGTTCTTGATACCTGTAAAGTCAAAATGGACTTTTTTCCTTTATGTAGGTAATAAAAACTTTAGATCCCAAATTAAATCCAGCATCAGCAGAAATAATGTTACTCAGAAAGCAGCTGGCGGAGAAGGAAAGAAGAATTGAGATTCTAGAGGTAACATCTCCACATTCATTAGCGCCTCACCTCTCCATGGAGTCCTGGGAGTTAACCTCTGT	TTAGAGGCCATGCTGAGCTGTGTTATTTGACTTCCCCCATGAACTATGATTGGCTTCTTCTCACATAACTAGAACAGTTTGTTCATACCCTTTACCTTGTATGATTTCCCACCAAATAATTATGAGCTGTGATGGAATTATTTTCACTCAAAACTTCTAACATGTTCTTTCCTACACCCAGAATCTATATACAAGGCTGGTGTGTGCCTGCTATCATCATTTGTCCAGACAATGCCATGGGTATGAAATGCACAG	GTATGCCTTCTTTATATTTATATCTTTATCTATTTATATTTTTATCTTTTGATACATGTTGAAGTGTCTTGAGGATGAAGAAGTGTGTCTTGCATTTCTGTAGCATTAACTGTTTTATAAATCTGAGGCTGGACTTGCAGCTGTATTGGTAATCTATCTTAGTCTTCATCTTTCGCTTTTGATTCTTGGCATGGGTTTGTCCTATTTAAAGTAAGGATACTTGACTGGATAATTTTTGAAATCTTAGTTTTCCAA
ENSMUSG00000030738	Eif3c	E001	0.0229756	-0.378723					ATAGTTTTCCTAGAGTGCCATAACCTTTAGAAACTCCAAGTCTTTTTTTTTTTAATATTTATTTCACATAGGTGAGTACACTGTCACTGTCTTCAGACACACTAGAAGAGGCTCCGACAAATCGGTAATAATTTCTCAATGCTTACTTGTGATTATGGTACGTGGCCTACACTAGTTAACAGTGAATCTGATACCAGTGGTCTGAACTAATTCTTCCTGCCTGATAAATCACCACCTACCCAACTCTGGGCCCAT	AATTCTCAACAGATCTTTAATGACTGGGGTGAGTTAGGAGCAAAAGGCTAGATGGTCTGTTCACAGGGTGACTGAAGTGGAGAACTCAGTAGGCTGTCTGAGACTGCTGCTGGCGGTAGCCACCACGGCGCATATAGCCTTCATTTTTTCGGTAGCCATCCTTTTGGT	CTGCAGGTAAAAAGGTGGATATGAAAAAGATTGGGAGTGAGCTCCTGGAGACAGACAAAGGCATAAGGATTGTGGGAGAATGAGCGACAGAACCACTCACTCACCTCGGAAATAGCCACCATAGGTTCCCTGCTTATGGTCAAACACCCGTTCATTATTCTCCACTAGGCTGCCAAGCTTCTCAGCCAGCTGCAGAGCCAAGTTCTGCTGGGCAGTGGGCTCAGTACGGTGCATCACCACAGTCTGTGTCGGCTG
ENSMUSG00000039270	Megf9	E001	0.0229756	-0.0242643					AGAGCAGTAAAACCCTAAGATAATACTTGTGATTTTGTGTGTGTGTGTTTTTAAGAAATAAAAATCAAAAATTGTCACTACATACTGTAATTGTTCTTATGTCTTTTAAAAATTTACAGCTAACACTGGTTTTAATACTAACATAGATTGCTGCTTTTCCATCTGTTAGTTCACACTCCTAACACTATCAATTTGCATAAAAGTTGTTTTTAATAAAAAAATATTATTTTGTGTATGGGTTGGAGTCAAGAGGAC	GATTATAATGGTTTTATTTACAATTGTTGTCACATTTAAATTACAATAGAGCATTTGAACTTTTGGAACATGTTCTACTCCCCTGAAGAAAATTAATACAATCAGTTGTGATAATGCAATGGAGATGTCTTTATAGACTTTCATCAGAAATATAAAAATACTTTATACTTTTAGTGGTATTTCTCCTAGTGTGTTGTTTGCATATTTTTTCTCTTGAAAACTGGCATAATTATTTTGTTCCCTTAACATACCAAA	CTGAAAATAAAAACAGAGAATGAAATGTAAAAGACAAAATTATCTAGTTTTGAGAAACAATAAAAGAAATACACATGAAAGTGAAAGTTGATATGGAATGTTGACATGGTACTCTGCTTAGAGGAATGCAAGTTAAAAATAATTTTTAAATAAATACAATGATAAGAAATGGAGTCTGGAAAGCTCATTTATTACATCTTACATCCAGGTCTGTTCTTTAATGTGTATAACACCTACACCAAACCTTTAGAAAAA
ENSMUSG00000041773	Enc1	E003	0.0230104	-0.0336844	recognized	257			AGCGAGTGGGGGAGATGCATTTTATAACTATGGCTGCCTTCTGTCTCTAAAAAGCCTCACTTGGATTCTTTATGATTAGTGGGTTGGGGGTGGGGGGCGCGGGGCATCTCCTTTTCTTGACCCCCCCCCCCACACACAGTGATTATGTCACAATAGCTCTCTTTCCAAACATTGGAAACAGAAGATGGCAGCTCATCATAGCATCAACCTGTGTAGGCTTGAGTTTGAACATACTCATGCATGAGAGAGGGCAGG	TCATTCTGATGCACGGCGAGATGAGATGTCATTTCTGCTTTGGAGAAGGCAAGTTTAATGAAGAGAAAGAAAAACAGGAGCAGTTGCTACTGAGACTCCTCGAATACCATCGGCTGCACCTTGCAAACACTCTCAAGTGGACATGAAGGAAGGGGTGGGGGGAGGGGCGGGTTTTTTTTTTTTCAATATAAGTAGCACATGGTTTAAATATGAATGACTGAACTTGTGATCTAGTCCTTGTCTGGTAATTGTGGA	ATTGTATTGTGAGTTTTTATTTGACAGCAATGAAAATTTTGGAAATGTGTTTTCTCGTATAATCAACGTGAAGATTAGTTCACGTGTTTTCTGAACGTTTCATTTAACCATTTAGCACCATTTTATGAAAGGAGTTCTGCACATAAAAAATTTTATTTGGCTTTCTTTCTCTTCTCTCTCCCTCCCTTCTCCCCACTCCCTTCTTCTCCCCTCCCTCCCTCTCTCTAGCCCTAGCTGGCTTATAAACTCTCAAAT
ENSMUSG00000041720	Pi4ka	E017	0.0231653	-0.499656			recognized	273	TGCAGGGCTAACATGTCCTGGAATGCAGAAGGCACAGGATGCAGTCAGTGTCTCCCCTCAGCTGCTGGACTACTCAGAAGCTAGTGGCCCTGGGGGCTCACACAGGTTGCCCGCAAGGGAAGGGGGCAGACTGTGGCTAAATAAGTGTCTAGGGGTCTGGCCTCACTGCCTAGCCAGGCTGGGCTGTCATGGGGTTGCCAGAGATGATGTCCTTCAACAATGGTGAAAGGTGGGGCTGGAAGGAGGGAGAGGCTT	TGTAGGCAGGGCAGAGGTGCCATCTGTGAGCCTGACTGCTGTGAGGTGGGTTCCAGCCCTAGAAAGACCTGGCATCTTAAGAGTGAGTTCTGCGAAGCACTAAGAGGTCACGTGGAATCACTGGGCTACAAGTTTCCCTAGGAACATAGAATAGACAGGCTTATAAGGAACTGAAGAAAGCCCTAGGGTTCAAGCACAGGACAAAGGGCCAGAACATAGCCAGGCTACTTAAGATACCTTTCTGCATTGGCCTGT	GCCACCTCCATACTGATGCTGGCCTCCAGATCTGTGGGGCCGCATATTCCATGGGTCACCCAGATTGCTCTCTTCTGTAAGAGCCTAAAGCAACTCGTGTGCCCACGGAGGCTCAGGACTGGGACTCGAGACGGGGTTCTGGGGCTCCTGTGACTTGGGTGACAGATCCTAGGGTAAGCAAGTGTTATTGCAGAGCACTCTGCCATTGTCAGAGGAAGGGTGAGCCTGCAGGCAGATGACTGCAGACATCTTGTC
ENSMUSG00000021196	Pfkp	E021	0.0236191	0.236439			recognized	2	GTGCTAAGGTTATGGTTGTTACAATTGATTGCATTCAAAATGGTGCCCAATGTGAAAACCCTCTGAGTGCCCCCGCTGGTCAATGCACTGGGCTCCTCGGAACTTTCCAAAAAAAAATTTCTATTTTTTTGAGGACCATTTTTGCTAGGTATCCATTAAGAATAAATTGTACAGAAAGAAGTTGTGTCTTTGAGAGGCCTTCCACTGGAAGTCATAGGGGAGTAGGCAAGATGCCTGACAGACCAGAGCCTTTCC	TTTGAAAACACCAATAAAGCCACCTTAGACATTTTGACTGCGCATGCTGCAACAAGGGTTGATTCAAAGTTATCAGGACCCATGTTCAATCTCCTAGTGTTCACAATTTGGGACGCCCTCAGAACTGTAGTCATGTCACCAGTCCTGGCATTCAGTGGCAGCTCCCAGTTAGCATGCCTTGGTTGTGTTTTTTGACTGGGACAAAGCTCAATGCTGATGGTAAGGAATAAAACCAAGTCCCGTTGAAAAGCCTCA	CCTGCATGAGTGAGCCTGAAGCCCTCAGGAACGGCTACCTACCTACCATTCAGCTTTCATTCTCTCATATTACCACTGGCTTTGAGAAATGCAAATAATAAGAAAAAGAGATTAAACAAAAAAGAAAAAATAGCACAAAATCCCTCTAAAGGGAGTAATAGGAAGAGGGAGTAGATAACCTTTCCCCTCTTCTCTTTTTTGAGCTTCAATTTTTCAGCAATATGTATATATCCTATATTTATATCTGGGACAAAA
ENSMUSG00000006932	Ctnnb1	E049	0.0236793	-0.0665495	recognized	414			TTGGCTTCTCATCTGATCTGTGACAGGCAGATCAGACTTTCATTCTCAGGAGGTCAGGCACAGTAAGCTGCTGCCACTGCTGCATGCTCTGCCGGGATCAGAATCAAGTGTGAAGGCACACTGCTGCTGGTGTGTGGTAGATAGTCTCAGGAACTGTGTGAGGCCTGGCTTTGTGTAATTACTTAGAAGAGAAGCCTAGAAAGCAGTGTTCCTGGCAAGATGTCCTTACCACAGTTAATCAGTCTCTCCTCTTTC	TCGTCCTTTAGGTAAGAAAGCTTATAAAAGCCAGTGTGGGTGAATACTTTACTCTGCCTGCAGAACTCCAGAAAGACTTGGTAGGGTGGGAATGGTTTTAGGCCTGTTTGTAAATCTGCCACCAAACAGATACATACCTTGGAAGGAGATGTTCATGTGTGGAAGTTTCTCACGTTGATGTTTTTGCCACAGCTTTTGCAGCGTTATACTCAGATGAGTAACATTTGCTGTTTTCAACATTAATAGCAGCCTTTC	ACTTGTGTCATTTTGTTTGTTTGTCGTGAGATGGTTGCTCAGGGTGATGAAGGCGCCCAGCTTGCCCAGGGGAAGGAAGGGGCGCTGTCGGGGTACCCGGGCTGTCTGGGTAGAGAAGGACCAAGTCTGGATGGGAGTGCTCGGTGACCCTTAGCAGTGTCACATCAAAACCCAGGCAAACCACAGGAAGGAAGCCTTTGTAGGCCTTGAATATTGTCACTGGCTGACTGCACTTCTGACCAAAGGGCTGAGGAA
ENSMUSG00000013275	Slc41a1	E007	0.0238192	14.6331					CAAAGTAGGCTAGGAGGTGACTAGTTACTCAGGAAAATGGCCAAGACAGGGAGTGCCCCAGCAGCTTCCATATCACATGTCCAGGCACTAGGTGGTTTGGGGGATTTTGAGCCTTCACTAATCTTTGCAGTAGAATCAGATGTGTGAATGTTAGAGTGTCCTCTGCCACTGCTGTCCCATCTTCCCAGGAGGCCACACAGATCAAATTTCTTCCCCCTTGAATCCTGGGCCTTGACTCTGACTGATCTCTGGGCT	TACAAGCCACGGTGGTAGGCTTCCTGGCATCCATCGCAGCCGTCGTCTTTGGCTGGATCCCTGATGGCCACTTTAGCATCCCACACGCCTTCCTGCTATGCGCCAGCAGTGTGGCTACAGCCTTCATTGCCTCCTTGGTCCTGG	GTAAGGAAGGGAAGGCTCAGGGTGTGGGGGTGCTGCTCACTCTGTCTTGCACGTCGACGTTCCCTTTTGTTTATTAATATCTTTTTCCCCTTCTCACCCTACCCGGCCTGCCTCTCCTTCCTCACCAGGTATGATCATGATCGGAGTCATCATTGGGTCTCGAAAGATTGGGATCAACCCAGACAACGTAGCCACGCCCATCGCCGCTAGCCTGGGCGACCTCATCACCTTGGCACTCCTCTCAGGCATCAGCTG
ENSMUSG00000001751	Naglu	E002	0.0240284	2.3705					ACCTAAGTCGGGGCTGCAGCTACAGACTCGCCTGGAGACTGAGAAGGAAGTGCTGGCTCGGGGATCTGTGCCTTCAAATCTTGGCTCCCCTCTAGCTGTATATTCTTGAGCCAAATCATTTAGCTTCCCAGCCCCCACTGCTGGAAATAATGACAAACTATAGGAACTGTGAGCCCTCTTCATGAGAGAGACCAATTTTGCCTTATGGCACTGACACCCTAAGACACCACAGGATGCACAGCAGGAGCTCTGGGC	TACCGCTATTACCAGAATGTGTGCACGCACAGCTACTCCTTCGTGTGGTGGGACTGGGCCCGTTGGGAGCAAGAGATTGACTGGATGGCACTGAATGGCATCAACCTGGCTCTGGCTTGGAATGGCCAGGAGGCCATCTGGCAAAGG	GTTTGTGCCAACCTGGCCCCTCACACTCTCCTGCCTGCCTTACATACACCCCTGCCCCTGGGAAACCGAGGCCTTCCAGGGTGGGACAAAGTATCTGGCAGTATATGTCTGTAATCCCAGGACTCAGGTAGAGGCAGGAAGATTCAAGATTGAGTTCCAAGGCAGGAACTCAATCAGGGCAGGTACCTGGAGGCAGGAACTGAAGCAGAGACTTTGGAGCAACACTGCTTGCTTCCTGACTTGGTCAGTCTTTCT
ENSMUSG00000027660	Skil	E012	0.0244837	0.682269					CCAGCTTCATATCTTAAAGGTCTTAGGGATACTCCCATTTAATGCTCCATCCTGTGGGCTGATCACGTTGACCGATGCACAAAGACTCTGTAATGCTTTACTGCGGCCACGAACTTTTCCTCAAAATGGTAGCATACTTCCTGCTAAAAGCTCTCTGGCCCAGTTGAAGGAAACTGGCAGTGCCTTTGAAGTGGAACATGAATGCTTGGGCAAATGTCAGGGTCTCTTTGCGCCTCAGTTTTATGTTCAGCCCGA	CAAGTTCCTTTTTTTTTTAAGTGTTGATTTTGAATACTAATGGTATTCTAATTCTGTGTGTCTATAGCTTTGTATTGTGAAGCTAGTGCTTCGGCTTGTTCATGTAACAACAAAGACCCATCAGTGCCATGTTTGTGTTTAGCCATGTTTCCTGTAGTTTTTCATCTGAGAGAAAAGTAGGATTATTCCCATTTTACAGATAAGAGAATGAGCCTCCAGTCAAAAATGATACTTCTAAAACTGCAGGCATTGGGA	AAAAAAAAAATTAGTGTGAATTTTATTTAGAAAATGGCTGTTGTGTTTTAGGATGCTCAATATGCAGATTTTCACCTTATCAGTAGATATTCAGCCAGATAAGAATCGGAGCAACTGAAATTCTGCTTCTAGAACAAGGCTAAGCAAGTACATTATTGGCAGACAAGCCTCAAGGTTGATGCTTAAGATTATTTTCAAGCATAGTAGAGAAGGTCATTTATACTTAGCTGATAACAGAATTGTCGGCGGTTCTTC
ENSMUSG00000033960	9430020K01Rik	E003	0.0246935	0.0710895					GTCCTGCAGTTGGAGACTGTCTTACTCACTGTTTTATTGCTGTGAAGAAACACCATGACTAATGGAAGAAAGTATTCAATTGGGGGCTGACTTATAGTTTCAAAGGTTTAGTCCGTTATCATTATGGTAGGAAGCATGCCTTCAGGCTGACATTGGAGCAGTAGCTGAAAACTACATCCTGATCCTTAGGTGGACAGACAGAGACAGACAAACAGCTTCTGGCCTAGTCATAGGCTTTTGAAACCCCAAAGGTCA	TTTTTAAATCAACCCTCCTTAGCATGGTCCTCTCAGCCCCAAAGTGGTAGAGACGACATCTACTGGAGCAGAGGAAGACAGGAGGGCAGTGGCTCCCTGTGTCCCAGGGACTGGAAAGAACTGGAAAGCAGAGGAATGGCTCAGGCTTACAGTCTGCCCGTCCATGTGAGAGAGAATCTGTGGGAAGTTGCAGGAAGGACAGAGCATGTGATGAAGAATGCCATCTGGGAAGAAGAGCTGAGAATGCAGGACATG	GTAAGGAGCTGGGCTGGAGGGCAGGTGCTTGGCGTTAGTTTGGAGTTGTGTGATTATTAGAAGCATGGGTATCCTCACCTCAACGCTGGCAATAAAAAAGTTTCATAGGATGATTTTTCATGCAGGCCTGGTGGCACACACTTGCCATCTTTGTATTTAGGAGTCTGACACAGGAAGAACTTGAAGGCCAGCCCGGGCTACATAGCAAGATGTCCTCAATTAAAAATTTAAAAGAGTGTGTGGCAAGGCTTCCAG
ENSMUSG00000024319	Vps52	E013	0.0248071	1.38963	recognized	472			TTGGCAGAGCGGTTGCTTAGCATGCATGCAGCCCCAGGTTCCATCCCCAGTGCCATATACATTGGCATGATGGCACAAGTCTGTTGTCCTAGCACTTGGGAGGTGAAAGGAGAAACGAGAGTTTGGGGCCAGTACAGATACATGAGACCCTGCCTCAAAACCAAGCAGTGTTCACCTTGGCAGCATAGACACTAAAATTAGAACAATACAGAGAAGATTAGCATGGTCCCTGTGCAAGTAAGAATCATATTTACA	CAGTGACGAAGATCCGGGAGTTTATTCTCCAGAAGATCTACTCCTTCAGAAAGCCCATGACCAACTACCAGATCCCCCAGGCGGCCCTGCTGAAGTACAG	GTGGGTGCGGGGTGGGCGCGGGGTGGCCTGTGCCCTCTCAACACTGCAGCGTGGGCATCCAGGGAGTCTGACTTGCCCTGGTCCTTCCAAGGTTTTTCTATCAGTTCCTGCTGGGTAATGAGCGTGCTACAGCCAAGGAGATCAGGGATGAGTACGTAGAGACGCTGAGCAAGATCTACCTGTCCTACTACCGATCCTATGTGGGGCGGCTCATGAAAGTGCAGGTGAGCAAGGCTGGAGACATGGAGGAGGATG
ENSMUSG00000075318	Scn2a1	E002	0.0250087	0.251571	recognized	148			GAGAGAGAGAGAGAGAGAGAGAGAGAGAGAGAGAGAGAGAGAGAGGCAGAAGCAAGATTACTGCCCTGCTTCTACAATTTTGTGTGATTTTTTTTCCTTCTTTTATTTTGAATGCTATATGTTCAGACAGAATGCAGGGCGAATAAAAATGGCTTCCCAAAATATTCACACAAACGAAACAGCAAGCATACAGAAAGATACACAGTATCTTCCATTTGCAAGCTCCGAACAGGGTGTTTTCCCCCAAAGTAGCAT	ACTTTCTTATGCGAGGAGCTAAACAGTGATTAAAGAAGCAGGATGAAAAGATGGCACAATCAGTGCTGGTACCGCCAGGACCTGACAGCTTCCGCTTCTTTACCAGGGAATCCCTTGCTGCTATTGAACAACGCATTGCAGAAGAGAAAGCTAAGAGACCCAAACAGGAACGCAAGGACGAAGACGACGAAAATGGCCCAAAGCCAAATAGTGACTTGGAAGCAGGAAAATCCCTTCCTTTTATTTATGGAGACA	GTGAGTTTTTAGACCAGTTGCTTTTATTTCCTCGATTTCTTTAAGATGGTGAAGAGGGTGCCTCTTTTCATCTCTTAAGATATCTGTAGAATATTGGGTAGGTCTGATAAGGGAATGGAGCCATTATTCCAGAAGTGTTTTGAAAGCATTTGGTTGAGCCTGTGTTCTTGGGACAGTCATATTTTGAAGAGGCATCCTGCAAGGGGGCATGTGAAGAAGACAAAGCCAATTTATTTTCCTGAGTACTCATTATAC
ENSMUSG00000035877+ENSMUSG00000093597	Zhx3	E010	0.0251464	0.165294	recognized	235	recognized	308	CAGCAAGTCAAAAACCACCTGTAACTCCAGTTCCAGGGGATCTGATGCCCTCTTCTGATCTTTGTGAGTACCAGGCACACATACAAATGAGGCCATTGAAATATTCTCCTTTGCTTGCCAATCTGAGTTAAATTCCCTAACCCTGTCTTCATACAGATGGTATCTCTGTGACTCCCATGACGTCTTAATCCATGCTAAGAAATGGTTAGAAACACAGGAGTCCCTTTAAGTTCTCTCTTTAAGACTATGTTCTCT	GAGTTGACGTCCAGACTGGGGACTTGAAGTGTCAAAAGGCTCTGAGCTGGCCTCAGGAGCACTTGGCTCCCATGATTCGCTGTTCTCAGACAGCTCCGAATAGGCATCACCCAGCACCTTGTGAACTGCCACAGGCTCTCCATTTCTAGGGCCCTGATCCTCACTGCTTATATCTGCCACAGCCCGGGTCTCTTCACCCATCTTCTCAGCAAACCACTGCTTGACCTGCTGGGCACTCATCTGGGTCTTATCACA	GCACCCTGTACATACAAAAGTTGGGTCTTTATTAAAGTCTGTGTGCTCTGAGTTCATATGTCCTATAAAGTGGGTCACATCCTGGGACCTGAACTCACACTCTTTACAGCAATATACATAGCCATCCAAAGTGCTCCGGTGCCCATTTGCCAGGGCAGAGCCATCAGTGCTGCTGGGGTTTGGGGCTGCCTCGCTGCTCGCATCAGGTGCCTCTGAGGGAAGATCCTGCTGGGGACCTTCAGGCAGAGACTCCAC
ENSMUSG00000068036	Mllt4	E067	0.0252554	-0.124188					CTGGCAGTTCTGGAGCCCCTGAAAATCTGACATTTAAAGAGCGTCAGCGCCTTTTTTCACAAGGGCAGGATGTGTCTGACAAAGTGAAAGCTTCTCGTAAATTAACAGAGCTCGAGAATGAACTGAACACAAAGTGAGAAGAGAGAGGTCTGCCCTTGGCGGGAGCTTTGTGGGGGCGAGCCTGAAGAGGAAGGAACAGTGCTACTTCTAAGTGATGTTTATTTTCTGTACCTGAAATGGTTGCAATTTAGAGAT	GTTAGCAGACAGTGACAGCTGAGCAGGTCTGAGCACTACTGTGTCATAGTGGACCCTGACTGCAGGAGTCAGGCCTCTCAGCCCAGGGCAGATGCTGCCTTTATCTTCTATCATTTGTATGACGTGGCTGGATGGAGTTTCTTTTGTAAGGTGCACAACACATTCTTGACAAATGTGAGTCTCCTGATCAATTTAAATGTTTGAGATTGAATATCTAATTAATAATTCAATTTTGAAAATTCTCAAAAAAATTTG	CTTCCTTTGTCCCTTGGTTGTTTTTCTGTCTGTGGGAAAGTGTTCTTTAATGACACAACCAGCTGAAGACTAGGGTGGCATTTTCACAAGAGTCCCTTGTGAGAGCTCGGTCACCTCTATCTACATGTCTACCCCTTATGCCTTCAGCATCCCAAAGGAGCACTGGGACCATGTCTCCTTTCACTACCCCATCTGGTCCCTGGACTCCCTGAACACACTCACGGATAAGCTCATTGCCTAAACAGTCTCCTGGTC
ENSMUSG00000041879	Ipo9	E036	0.0253881	-0.387245	recognized	175	recognized	340	GTAGGCGTGGCTACATCACGGGAACTCCCAGGGCTCTTCCACGCTCTCACTAAGCTCTCAGGGACCCCTCTTCTGAGCTGCTGCGTTCTTGCTGGCTGGCAGGTGATAAGGACTAACCTCACTGCTTACAGGAAGTGCTGACTAGGTTCTCCTATATCCTATGATCATTGCTCAGTGGTTTCACAGAGATTTTCCTAATGAAAAAAATGTCCTGAAAGTCTAACATTAGAACTAGGATTTCACATAGTTAGTCTC	GGAAAGCGCTCATCCGAAAACAAACTACATTAGCTTTGTAAATTAATGAACATGTAAAGTACTTGCTAATTTTTCCTGAAGAGCTGGTAGAAGAGGCTGAAGAGTCAAAGAAAGGAAGTCTGAGGATATTAAATACTTTAGGAGTAAAAGAGTCACAGACACTGAACACATTTCCCAGCATGTCTATTTCTCATCTGAAGTACTTAAAAATATTGACAGAAATGAAGGCTACCATCATGTGGGACTTCGAAATTA	CCCTTTCCCTAACAATTGGTATTTCCGTTAGGGTCAGAGAAACTTCGTACCATCCGAATCCACAGGATCTTCCACTTCCTCTGTGTAATTCACTTCCGTCCTCACATAAGTATGATGCAGAGTCAAGAAAGAATCTGGAGTCTGCTTTAAATACAGTCTACAAGGGAGTGCTATATGCCCCAACACCAAGAACAGACATAACACTTAGAGGTAGGCGCACATGACTGAGCCCCAAGGCTAGATCCCCAGTGTTAG
ENSMUSG00000025907	Rb1cc1	E058	0.0254928	-0.196434					CAATGGTGTCAGCGTTTGGATGCTGATTATGGGGTGGATCCCTGGATATGGCAGTCTCTACATGGTCCATCCTTTCATCTCAGCTCCAAACTTTGTTTCTGTAACTCCTTCCATGGGTGTTTTGTTCCCACTTCTAAGGAGGGGCATAGTGTCCACACTTCAGTCTTCATTTTTCTTGAGTTTCATGTGTTCTCTTTCCTTCTTAGGCACAAAACAGATTTAAAGTTCCTTTGGGGACAAAGTTTTACAGAGTGA	GGCTGAATCAAAATGGTTTTGTTTTGTTTCCACCCAAATAACTAGAAATTCGGACCAAAATAGATGTTTTCCAAGGGCAGAGCCTGCACTGTGGCTTGTGACTAGCCTCATTAGTTGCCTGTTAATAAACATTAGCTGAATAGTTACCAGTGTTGTTACCAGCATTTGTCCTCTTGTGAATTCAAGAGTCCTCGCACTCTTTAACATGTTCTTTATAAAATGTATAAACCCTTCCAAACTATTTAAAGAGGAGTG	TCATGTTTCTATTCAGTCCTTCAATGACATCTTTATATATAGACTACAAGTGTAACATGACTTTATGTATTTTTAAAACAGTTGTATTTGTGATTGAGTCTGTTAGTGCAGTCTATTTCACTTAATTGGTGCTCTTCAGATTTAATATATGGTTTTATGCTGTGGAATTACTGTGTGTTCTGACACACTAACTCTCTTTCGTTAACACTGAGTCTTGTGGTCGTTGATTGTCTTTGTTACCCAGTACTTTCATAT
ENSMUSG00000068923	Syt11	E002	0.0254928	-0.0320037					TGGGGCTGAGAACATAGCAGAACAGGCCAGGACATGCCCGGGCAGGCCCGTTGTTACATGTCCTGACTGGCCTAGTGCCTCTCTATCTCTCGCCCTTCAGACAGTCTGTTGATGTTTAAATGGACCAATCATGTGAAACCGTGCCAATTCCTCCCCAGCCCCACCCCTTTTCTATAAAAGTCCCTAGCTTCCAAGCCTCGGGGTCGAAACCACTGTCTCCTGTGTGAGATACATTTCGAACCGGAGCTCCGCAAT	CTATTTAATCAGAATCAGTCTTTATTCTGCACGTGTGTGGCGCATTAACAAGGTCCACATACAAGATAGCATTACATATTGCAGGTTAGCGTCACAGCAGTATGCAATTTCACACAGTTCATGTTAGCTTTTTCCATTTTTTTTTCTTTTTAGTTTGACACTTGTATTTTTTTTTTCTTGAGTTTTATTTTTACAAGAGAAGACACAAGGTAAAGAAAGACGACCACTTTGGAGAGGGATCGTGGTGAGGGCAAT	CTGGAGCCCCCAAAGAGAAGAAGAAGAGAGACAGGCCTATGACACGGTCCTCTGCTGTGTGCTGGTTCTGTGTTTAGAATTCTAACAGTGGTTCTCAACTTGTGGTTCATGACCCCTTTGTGGGTTGAAGGACCATTTCACAGGGGTCATAGCAGTTATCCTGCATATCAGATATTTACACTATGATTCGTAACAGGAGCAAAATTATAGTTATGAAGTAACAATGAAAATAATTTTATGGATAGGGTTCACCAC
ENSMUSG00000031284	Pak3	E036	0.0255503	-0.0280609					CAGTTTAAGAAATGTAATGTCTGGCCATTACTGAGTGAACCTTTCCAAACTCTATACTAAAGAGTTTCTAGCTATGCCAAGTAAATTTCCATAGGATTTCATGACAGTTAAAGACCAAAAAAGGAAAAGAAAATCTGAAGGACAAAAGCTGGCAGGGATTCTTTAATTAGTGAGTACTCGAAACACAATTAAATGCAAAGGAGCATATTTGAAAATGTAAAATTACACTAATGCAGTAGTTCTTAACCTGTAGGT	ATCCGTTTTTAAAATTAGCCAAGCCTCTGTCTAGTCTCACTCCTCTGATTATCGCCGCAAAGGAAGCAATTAAGAACAGTAGCCGTTAGAACTGCAAGCCTTACCCCTCACGGTCTCCAGGATGAGTAAGACTGAAATAAAACTCTGCTGCAGGATCCACAGAAGAAGAGACAGTCAAATGGAGTGGGGGCTCTTTAACTTTTAAGTGAATAGAAACTTCTTATAAACCTTTTTCCTACTCCCTCAGATTATGTA	TGTTCTCTTGTTTCTCTCTTCTGTCACTCTTCCACCCCACCTTGATCTCATCAGTTATTTTGCCCATTTCACATTTTGGAGGGTATTACTCTCTTAAAGGTGTAGAGGTGATAAAATGGCCAGCATTCTACCAATACAAGATTTGCCTCAAAGAATCTTCCACTGCATAACTCAGATTCTCTACCTGACATTTATATAGACTAGCTCAAAACAGTGTGTATATTCAATACAAAGCAAATACTTCGTAGATTTCAA
ENSMUSG00000040423	Rc3h1	E025	0.0255503	-0.054635					GCTTGTCAGTTTTAGTTTATCATCTATGCTACAGTGTGGATGAGGAGTTAGAATCAATATTTGGAAGCTATTTATGTAGTTATTTTTATTTTGGCTGTTTGAGACAGTCTCATTGTGTAGCTAGCCTTGGTTGGCCTGGAACCAATCTAACCTAAAACTGATAAAGACCAGCTGCTTCTGCCTTCTGCTTGAACTAAAGGCATGTGCTCTACTCCAGCCTCATGTTTTTCTACAGTGCTAAATAATAAGCCCTAT	CTTCTGCTCCTAATCAGTTCATGGGGCATAGGGATAGAAAAATGGATAACTTCTAAACTTTTTCTCTGAGTGGTCAGTGAAGTCCAGGAAAAGCACCGGAGGCAATGTGCACAAACACCACTACTAAACAAACCTGCACATAGTTCACATTGATGCATTTTTTTAATTTTAAGAAAAAAAAATTAGCAGTATCTGCAAGCAATTCAGATTAAATTTGTTTTTGTTCTGTGAATGAACTTTATTTTAATAACTTTG	CAGTGTGTAGTCTTTTTCTTGTCAATGAGTCTGCCACCTCGTTCTCGTCTTGGGATTGTTGATAAAAAAAAAAAAACAAAAAACAAAAAACTTTTAAAAGCTAATTTATGCAAGTAAGCACACTGGGCGTCAGTTTTCTCTACCCAGAATTGCTGTAGACTTGAGTATGCTGCAATTGAGAGGCAGGCCTGGTTCAGAGGCTGCGAGACCCATAGTCAGTGAGCTGTAACATTATTTTATGACGTCTTATCAAGC
ENSMUSG00000060882	Kcnd2	E006	0.0255543	-0.0633802					AGTTGGTGATAAGTCTGTCACTTGTAGAAAATGTCAGACCTCAGATACTTAGACCTAAGTCTTTGAGTTTCTTAACATATGGCTTATCATTTAGTAGGAGCTTTCAAGAAATTGTGACTTTTCGAAACAACACCATCCCTGAGATTTTATAGCCGTAGGTGTTACAAAATTCTCCATGGGATGACATTACATGCTGAAGCCTCTCAAAGCCTCTGCCAGAAGAAACTATTTCAGTTGTTATCTGAGCCCTGTTGT	CGATCCAGCTTAAATGCCAAAATGGAAGAGTGTGTTAAACTAAACTGTGAACAACCTTACGTGACCACAGCAATAATAAGCATCCCAACACCTCCAGTAACCACCCCAGAAGGCGACGACAGGCCCGAGTCTCCTGAGTATTCGGGAGGAAATATCGTCAGGGTGTCTGCCTTGTAAGACAATTGCCGCAGGTCTGAGAGAATTTGAGCCCTGACTATGGAAAGAATCTAAAGGAGAAGAAAGAAGAAATAATAA	CAACATGGTTGACTGTGGCCTTTTTTCATAGATTTAATCCCTTTCCTAAAGATGTGTCACACTAATAGTAAATCTAAGAGGACCCTGTGACTCATGCAGACTAAAAGAACTCAAAACGTCACTGTAAGGTAGACTGGATCAGACAATAGCTTTTCTCCATCACTGGAATGCCAGAAAGATAGATCATGGAATGGGGGAATCACTGAGAAGTCCAGACTTTGAGCTAGATATACTCTTATCACTGTTGCTTGTATC
ENSMUSG00000019951	Uhrf1bp1l	E021	0.0256399	-0.0961689			recognized	227	GTTCTGGGCCAGGCTGTCTCTTGTCTATGAGCTAGTTGTATCATGGGACTAGTGAAAGTCACCTAAGAGAGTGACTTAGGTAAAAGAGAAAGTGGGAAACCGTGAGATCTAATAAAATTTGAAAACTGAAGGGGTCCCAGGAGGGGTGAAAAAGGAGTGGGTGGGGAGGTGGCAAATTGAAAGAACTGGCTGGTATAGGCAAAAAGATGGAGGCTTATGACAGAGAAGGAAGGTCAGCGCATCTGAAGACACAGA	TCATGGAGGAAAACGAATGTCTCAGGCAGAGACTAGCTCAAGCTAAAATGGAGCTCGCGGAGGCTCACTCGGCCAGAGATGAGCTTCTCCATCAAATGAAGAGGATGGGCCTGTAGCTGCCGTGGCCGTGAGAACCGGGGCTAGAGCGCTGGAGAAGGACGGCTAGGTTTAACAGAAGGATGTAACCAGTTAGTGGGAAGTTTTCCTTTACATGAAATAAAGCGAGTGGTGAAGTGGCGGCTGTTCCAAACCCTG	AATATACTTTGTCCGATTGGTTTTTCCTTTTTCTTTTTTCTTCATAAAAGTGCTGTTTTGATAGTGGTTTACGATTAAGGAAACATCTCCCAAAATATTGCCGTGTACCCCCACAAACACAGGAGGTGGGTGTGATTGGGGTGCTAGAAATTTGAGAGGAAAGAGACCTTTGATGCTCAAAATAAGTTGGCTAGAGCCACAATTAGTGATGTGGCTTTGATTTAAAGTGCATGATTATAGGTTTTATCTCAGCAC
ENSMUSG00000022973	Synj1	E003	0.0256399	-0.0587631	recognized	114			GCAGTGATGTGGAGAGGCTGTGAATCTGCGGGTCCAGACTGATTACCTTGTCTCTGTTAGCTATAGCTCCTAGAACAGACGTCCATTGCCCTCCTATGGGTCAGAAATAACTTGCATATAGGCTCTGAAATCTATAAACGTAGCTTTCACTAACCCAAAAGTTAAGAATATCGTCAAATAGCATCTGGTAACTAAAGAAAAACTTCGTCTTACTGTATATGCCTCTCTGGCATTTCCACCAATGTATTTTAAACT	GACATATTTATTTCATATGACAGCACATCTCACAAGATATGTACAGAATGTATACCAGCAACTTTAATACTGTACTTCTATAAAGTATATAGTTATAAATACTGTATGCCACATAAGCGATAAACCTCTTACATACATATAAACAGCAATCTACTAGAGAGAACAGAGACTCACAGAGATTCTTAGTGTCTGTTTTCTGCTTTGACCAGACCTGGCAAATACACACGATGTCGAGTTCTTTGTAGCAAACTTTAA	TTATCTTTCCGTGAAGTCCAATGTGGAAGGTGCCTTAGATGGCAGGGTTGTGCTAGGTCCTGCAGATGAGGTTGTGCCAGGTGGTAGCAGAGGGACAGGAGGTGGTGGTGGTGGTGGCCTTCTGGCTGGCAACACACAGAAAGAAACGCTCGCACCTTTACTCCAGTCATCATCAAATGAAGCTGGCGCGTTACCCACTAAGTCTGGACAAACTGACTTTGACTTTCCTGTTGTAGGAAAGTTGTCGTCTTCGTC
ENSMUSG00000038970	Lmtk2	E014	0.0258492	-0.0574005					CAGTGTTGATTTTGCCATTAAGTCTTGGTCTCTGTGTGATACTGGACGGCCAGCTGGGAACTCACAGCAGGGGCCATTTGAAGTAGCAATACCTGAACATATGGGCCCCTTTCCCTATACCAAGATCAGGAGATAAATATTAATAGGTACATTTTTTACTTGAAGTTTACAGATCAAATAATAACTGTAGGATATAAAGCACTTTTGTTTACTTGGTTTTCACCTGTGCCGATGAGATAATGCCAGAGCCTGAGG	CAGCAGTGAAGACGGAGACAAGGACTAGTTGGCTGTAGACACTCTCCCAGCCAGCAGCGCTCCTGCTTGTCCACCTGAGCAACGCAATCCACTCCATGCTGACTGGCACCAGACAGTGAGCGGCTCAGGAGTGATGGAAAGCGGGGCCACCACGCCAGGAAGCAACTCCCTCTGCAGCGCTCGTCTGCCCGCTCGCCTGGGCTGCTCCTGCACTCGTGCTGGGCATCCTGCCGAAGTGGCCACACTGCCACACTG	TCTCTGTTGCTACATTTACTCCTTGTTTTTTCCATGTGCGGGTTTGGCCTGGTGCTGTGGATCTCTGAGCTCCCCGTGGTCCTAAGGCACGAGGGTGATTGTCAGGGGACTGCAGCGTCTGGTGCGTGTGTGGTTGTGGGCTCTGTAATCCAAGCCTTTCTACTTACTGAGGAGTTGTAGCGAGATTTGGCTTATAAGGATTTGGCCTTGGCCCAGGCCCCACATGCTACTCCAAGAGGTCACAGCCAGCCTTTC
ENSMUSG00000022253	Nadk2	E005	0.0270717	14.2565					ATCCTTCTTTTGGGGGGGGGGGTCCTGTAGGATCGGCTTCTCAGTTCTTTTGTTTAAGGATAGCCTATGTGCTCCAGAGTGCAGTTGGATTTCACACAGTCCACAGTTTGATTCCGCAGAATAACATTGCTGTTGCTGGCTTATCACACTTTTAGAAATAAGGAAACAGTCCTAACATGACTTATCTGAAGTTAGCAGTTAAGTAATTTCGAGGATCCCACTCTACTATGGGGAGTAGGCAGGGTGATTGGAAGC	TCTGAAGGTCACTTATGTCTGCCTGTGCGATACACGCATTCCTTCCCTGAAGCCTTACGGAGGTTCTCTCGTGGTGAGTTCAG	GTAGGAGTTTCTTATTCTTCATATTTGATCCTTTAATAAATTAATATGTGGTATTGACATTGTTCAAAAAGAAGACAAGCAGAAAACTGGGGCACTTCATAGTTAACAAAAAAAAGCAGCCGTAAAAATTCCAGGGGCCAGTCCCAGGCCTCGCCTTACCTTCTCCTAGTTCAGTTAGAACTAAGTAGAGAGGACGGGACAAATGTTACTTGGCCCGTAATTGCAAATGAAGATTTTAGTCCTTCAGTGAGAGTG
ENSMUSG00000029034	Cpsf3l	E013	0.027099	0.773158					AAGTATTTGGTTTGAGTGAATTGCTAGGGGTAGAAAGACAACTTCCTTATTGGATTTTTTTATTTTTTTATTTTTTGGCCAGGGTGACTATAACATGACCCCAGACCGGCATTTGGGGTAAGTAGGGCTGTGACTCACTCTGCGGAGGCTTCCTGGGATTTGGTAGCTCTAAGAGACGTCATGGTGGTCACCTAAGTCCTCCCATGCAGTGTGGAAGTCTGGGCTACAGGCTCATCGTCCCTGTAGTCTCCTCCT	TATTGACTGTAGGCAGACTTTGGGTGTGTGTCCACTTTGGCTACACTCTATAGGCCTCCTAGTGGGCTTTGCTGTTGTACCTTCGGTCAGGGTCCCCGGGTATGTGTGTGGGGGGTTACTGTTTGTTTGGCACTAAGAAGATAGATTCCAGAGAATCTTCCATTCCCTCATTCTTACATCCGATGAAGAGCTGATCATGAGTCTCCCACAGTTCCTGCTGTCTCTACATGTAGCTGGGGTACATCCAAATCTGTG	GTGCTGATTCCTGTGTTTGCACTGGGCCGAGCACAAGAACTCTGCATCCTGCTGGAGACCTTCTGGTAGGTGCAAACAGGAAAATTCCACTGGTAGGCAGAAAAGGATGGGACAGCCTCCATGTAGGAGAGTAAGTCTCTCATACTACCAGGCACAGTGGAACTGCTAAGAAGTACTCTATAGCCGGGCGGGGTGGCGCACGCCTTTGATCCTAGCACTCGGGAGGCAGAGGCAGGCGGATTTCTGAGTTCGAGG
ENSMUSG00000086040	Wipf3	E012	0.027099	0.496189					AGCTGTCCTGTCTCCCCCCCCCCCCAAAGCCCTCCTTTAGGAATTCAGTAGGTACTCTTATTGAACACTAGCTAGTACCAGGTTCTTTGTTGGTTCCTCCCCCTGCCTGGAGCCCTTTTCTGCTCCTTCAGTGGCTCCCTTAGGTGGGCGGAGGATCTCGGGCATGGTGGTGGGGAATTACTGCCCTTGCCTCTGCTGCATCCCCTTGTCCAGCCAGGAACACTTGAAAAGCAGGTGGACTCTTGGAGAAATAAC	TAAGTACTTGCTTTACCAAGACCCTCCACAATACAGGGTGCCTGCAGATAGCACCATGCCTTTACTGTCCGCTAGCAAGGATGCTGAGTGTGCCCAGTCCCACAACCTTAAGGAGATGTATTTGTCCTGATGCCTAATGGTTCACTGAAAGATGTCTATAGAATGCCAGAGTTCACTGGCATCCCCTGGGACATGCTGAAATGAGCCATGCATCCTTCCCTCCCCAGGGCCTTTGGCTAGGAGGCACCCAGACAA	CTTAGATCACAAATGCTTATTGTCACTATAGCAGGAAGAAAAGCCATTGTTATGTGACCAAATACTTGCCCACCAAATGCTCTCACCCACTAGAGAGATTTAGACTGGTGAGTGCCACACCTGCCCACAAGAGCCACACCATGGTGGAGGTTGGGAGGGGAAACACCACACATGCCATCTTATTCCCATGTCCCCAGTAAATCCATCACTGTCACTTCAGTGGGAAAGTGGCGGATTTCCACCAGGGCTGTCCTT
ENSMUSG00000043535	Setx	E015	0.0272567	0.117361					TTTTCTAAGATTTTTTTTCCCTCTTCTCCAACCCCTTTCATTTCAGTAATTTCTATTTATTCTTAATATTTAAGGACCAAGTTAGAACCGGAGCCACATTTTGATGATATGGTGACGTGCAGCCAGATTGTTTATAACTTTAATCCTGAAAAGACCAAAAAGGTATAGAACATTTTTAAAGCTGAAGTGACTCTGTAGAGACACTGTTCTGTGTAGTGATTGGTTGTTGACTTTATGATGTTTAGTTAGTCCGAA	ATTCTGGGTGGAGATCAGCCATTTGTCCAGATTATTGTCCAAACATGTATGAAGAAATGGAAACATTAGCCAATGTACTTCAGTCAGATATTGGTCAAGATATGCGTGTTCATAACAGCACCTTTCTGTGGTTCATACCTTTTGTTCAGTCACTCATGGATCTTAAGGATTTGGGTGTGGCTTACATAGTAGAAGTTATTCATCATCTATACTCAGAAGTCAAAGATGTCCTCAACCAGACAGATGCTGTGTGTG	GTAAGTATTCTTTAATTCTTTGCCCCTACTGTAGATAGAGAAATGGTTATAAGCATATAGCCTGCTTTCTAAGTTTCTATAAGTTTGAGTCTATACTCACTTCAGTGAGAAGGTATTGGAAGATTTGGAGTTGGTCAGTATTTAGACCAGGGACTAGTAATACACAGTAGCTTATCCTTACCCAACATCCTTGGTTGTTGGGTAGAGAATAAACTGTGGAAAGGCTAACAGGTCTAGTAGACTAGTTATAGGTTG
ENSMUSG00000036273	Lrrk2	E025	0.0277053	1.92212					TAATTTCTATAAATAAGCTGAATTGAGGTATCAAATTTATACTTATGAGCCTGCTTTTGAAGGTTGCTTATGGATTTTTTTTTCCTGTCTTAATTTACACTATAGCAAGAATTGTTGGCCTACTAAGTATACCAAAGTTCTGGTGAGCATTGCATTTTCAATTAAAAAAAAAATCCAGATGGTCCCAGTTAACCAATGTTAGGATGACCAGAACTGGTTGCTGGAGTTATCTCTCAAATACTCAGTATGGAATAT	GAAACTTGAGCAGCTCCTACTGGAAGG	GTAAGAACAGGCTCATTAAGGCAGCAGGGAAAATCGCATTGCATAACCGAACTTAGCAGGGATGCAAAACGATGTCACTGTTTCTATAGCGACGAGTTTGAAGTAAGCATGGTAAAGGGAAAGTGTGGCTGATAATTAAGGCAATATTGTCACCTGGAACCATCACAATTAATTTTAAGAGGCTTAAATGTGCTTTGAGCCGTACTTGGAGTATAAATTGATTTCATACCTTTCAATTCTACTAGCATTCACGTT
ENSMUSG00000038039	Gcc2	E016	0.0277347	0.0950056					TCTAAAATGTCTCTTACTAATCTATTCAGGAGAAATACACTGAAGCTTTTTACCTTAAATAATTTAATACCTTTAAAAAGATTGTTAAATACAGAGGTTTCCAAGTTGTTAGTTACTTTAAGTAAAAGATTTTGTATTAATGATAATAGTTCTACTTAATTCTTCAGATTTCAGAATCGTATTGCTCTAGGTATATTCTGTTCACCTCTGGGATCCCCCATCATCTAGTTAACTCTTTAGTAAAGATAGAGATTT	CTCTGAAGATAACGTGAGAAAACTGCAGGAAGAGATTCAAAACATCACAGCAGCATTTGAGGAACAGATTTCATGTCTAGAGAAGAAATTAGAAGCTACCAGTGATGAAAAACAACAAGAGATTATTCATCTCCAGAAAGTCATTGAGGACAAGGCTCAGCACTACCAAAAAGATATTAATACTTTCCAAGCAGAGATTTTGCAGCTGAGAGCTACACACAAAGAAGAAGTTACTGAGCTGATGTCTCAAATAGA	GTACTATTATTTTGAGTTTTATTGATTCGAATTAATCCTTAGCTCTGCTCATAGGTTATAGAAAATACATGTATTAACATTTTTATAGTCTGAAATCAAAACTTAGCTTTTAGCATTCAGGCTCAAGCAGCAAATTTCTGGCAAATGAATTAGTAAGCACTGTGATGTGGTGTATCTCAGGCAAGTGTGACTAGTCATGAGCAAAGCTAATGAAGGACCAATGGGAACTGCCGCAGGACACAGACAGTGCTTTTC
ENSMUSG00000026234	Ncl	E001	0.0279033	0.102305					ATTTTGTTTTGCTTTTGTTGGTAATGGAATCCTTGTGGCTATTAGGAAGGCATTCTACCAACTGAGCCATTCTGTCAACAGTCTGCCTTGTTTTTTGTTGCCTGAAGATTTTCCACTCTCAAAATTCTGCCTTTGTAGTTATCTTCCCAATCTACAAAAGCCAAGGGTGTCTTGAAAGTGTTTTGTCAATTTTCCTTGGAAAGAGAAACTTCATTGTCTCTACCAACCAAGATGCAATTTTGCCATCTTGCTTCA	ACATGTTTACTAGAGGTTTATCCTTCCCATAGTTTACCTTGTGGATGTGAATCATTCCGATGTTTAATTACTGTATGAGTGATATGCATGTTCAGGTACATGCTTGCTACAGAGAGGCCAGACAAACCTATTGTTTCTCTCCTTCAGCTTTTACATCTTCTAGAGATCAAACACAGGCTGTCAGGTTTGGTGGCAGGCACCTTTACTAATTGAACTCACTGGCCCCCTTTACAGATATTTTTAACCAACAAATGC	CTATAGGAAGGAAAAACATCAAAGGGTGATACAATTAGGACTGACCTTCCCATTTAAGGTGGTTGGTTAGGACACAGGTTTAGGAATCCGTTTCCAGTTCCTTTCCCTTCCTTACCTCCAAAGCCTCCCCGGCCTCTTCCTCCAAATCCACCTCTTCCACCTCTGCCTCCACCTCTGCCTCCGAAACCTCCTCTGCCTCCACCTCGACCACCAAAGCCACCTTCACCCTTAGGTTTGGCCCAGTCCAAGGTAACT
ENSMUSG00000020612	Prkar1a	E017	0.028019	-0.0561935	recognized	292			ACCCTGCCTTTATTGTTTTTGAGACAGGGTCTTTGGTAACAGTGCAGACCGGCCTTCTTAGATCTGCCTTAGTTAGCCTCCTAAGTGTTGGGGTTATAGTCATGATACCTGGTAGATTTCTTAACCTATACTCTTTCTTGTTTCTCAGAGAAGTACTGTAACATTAACTTTATTCAGTTAATAGATGAGCACAGACCAAGCATGCATGCGCACACGCACTTGCGCTTATGTCCTACATAGCCTCGACTGCCTGGA	TGAAATTGCCCTGCTGATGAATCGTCCTCGGGCTGCCACTGTGGTTGCCCGGGGCCCTTTGAAGTGCGTTAAGTTGGACCGGCCTCGGTTTGAACGCGTCCTTGGCCCGTGCTCAGACATCCTCAAGCGGAACATCCAGCAGTACAACAGCTTCGTGTCCCTGTCCGTCTGACCCGCGCCTCCTGTGCCTCCTCCCCAGTCCATGCTTCACTCACGCAGACTGCTTTCTCTCCCTAGCCGCAGCGCCCAGTGGCC	AAACGAATCAGTTTTTCTTCCTTTCTTCCTTTTCTTCCTCTGTTTTTCCCCAAAATTTCAGTGGGAAAGAATGAAAGTGAATTTTGGGATTAGAATTTTGAAAAAGTAATGTATTTATTTTTTTTTAAAATACATTCCAATTCAGTTTGTCAAAGGGTGGATTTCAAAACCTTGCTTTTATGGGTGTGGGACAGACTCACTAACAAGCTCTGGAAGGGGAAGGTTCTGTCCAAAGCCATGGCGTTGTTTTCACAG
ENSMUSG00000005871	Apc	E030	0.0280201	0.113124					GAAGATGATGAAAGTAAATTTTGCAGTTATGGTCAGTATCCAGCTGACCTAGCCCATAAGATACACAGTGCAAATCATATGGATGATAATGATGGAGAACTGGATACACCAATAAATTACAGTCTTAAATATTCAGATGAGCAGTTGAACTCAGGAAGGCAGAGTCCCTCACAGAATGAAAGGTGGGCAAGACCAAAGCATGTGATAGAAGATGAAATAAAGCAAAACGAGCAAAGACAAGCAAGAAGCCAGAAC	AGAAGAAGAAGAGAGACCGACAAATTATAGCATAAAATATAATGAAGAGAAACATCATGTGGATCAGCCTATTGATTATAGTTTAAAATATGCCACTGACATTTCTTCCTCACAAAAACCATCATTTTCATTCTCAAAGAATTCATCAGCACAAAGCACTAAACCTGAACATCTCTCTCCAAGCAGCGAGAATACAGCTGTACCTCCATCTAATGCCAAAAGGCAGAATCAGCTGCGTCCAAGTTCAGCACAAAG	TCCTGGGCAGACCATGCCACCAAGCAGAAGCAAAACCCCTCCACCTCCTCCACAGACAGTGCAGGCCAAGAGAGAGGTGCCAAAAAGTAAAGTCCCTGCTGCTGAGAAGAGAGAGAGTGGGCCTAAGCAGACTGCTGTAAATGCTGCCGTGCAGAGGGTGCAGGTCCTTCCAGACGTGGATACTTTGTTACACTTCGCCACAGAAAGTACTCCAGACGGGTTTTCTTGTTCCTCCAGCCTAAGTGCTCTGAGCCT
ENSMUSG00000083405+ENSMUSG00000034158	Gm15725,Lrrc58	E003	0.028311	0.417354					GGGAGAGGCAGTGGGGAGTGTGCTCACAAAAATGGAGTAGTAATTTGGCATAGCTTTCCTTGGGTCTTGTGGGACTTGACAATTTGTATTTTTGATCTTAAGCATTCCTGTCCTGGTGTGACTTTGTAATGAAAAGGATCATTATTCATAGTATACGTAAAATCTTTTTTATTGTATAGGTGATATAATATGTCCTCTGGTGTCTTTAAATCTATCGTTTAGCTCAGCTAGGACACAGAATACTTTATAAATGTT	TTGCATTCGCTTCGATCCCTCAGTCTGCACAATAACTTGCTGACTTACCTGCCTCGAGAGATCCTTAATCTTATTCACCTGGAAGAGCTGAGTTTACGAGGAAACCCGTTGGTTGTTCGTTTTGTTAGAGATTTAACGTATGACCCTCCGACTCTTCTGGAATTAGCTGCAAGGACCATTAAGATCCGAAGTATTTCTTACACTCCCTATGACCTTCCTGGGAATCTTCTTAGATACTTGGGTTCAGCCAGCAAC	GTAAGTTGACCTGGGGTTGGCCTTCGTCACTCTCTTAGCTATTTGTGAATTTTGATGTTGTATTTTAATTAGCTAAGGCTTCTTTCACAGGAAGGCAGTTAGTAGAAAGTAAGATGCTTTGTCGCCTCAGCTTCCTCCTTCCTTAAAAAAGTCTTAAGTTTAGAATGTTTGGCTGCCGTCCGTGTGTATTTGAAGGTTCACTATTTATTGTATTAGGTTCCACTAGTCGATGCTTCTCACCCACCCACCGGGATG
ENSMUSG00000019923	Zwint	E018	0.0283162	0.368466	recognized	370			GACCATTGAGCAGACGGGAATTATGCAGCTTCACTCCATCTAGGGCTGAGATGGCTAAGAACACAAAAGTATGGTAACAACTAGAGATAGGCTGACACGGTCAGCTTCAACACCTGTTATATTATGCATGTTTGTATTTTGAAAGGGACAAAGAAGAACACTGGTTTGGCCTGGAACACCTTTTCTACTGAGAATGAGAAGTGGCCTGATATACTTATAGCTTGACAAGTGAGATGGTTTGATGATGTCTTCAAG	TTGTTGTTGATGTTGTTGTTATAGCACAATCTACCGTATTCTGCCTGATTTAAGATAAAGAGCATAAAAATAGTGCTAGCTTGTGAGAGTTAGCCTGCCAAGGACTGTGAGGGCTAGATAGTGAGAGGTTGGAATTGAGCCAAGACACACTGATGATAAAATAGGTGGAGGAGTAGTGAAGATAGTTGCTGAAGTATGCCAGGCTTTAGTTTTATTTAGAAAAAACCATAAGCCTTTATTACATTTCTGTTTGAT	GAAACTTACGTGTTTAGTTGCTATTTTATTGCTGTGTGTGTAAGCACTATGACCAAGGCAACTTGTAAAAGGAAGTATTTAAAGGGGGCTTGCTAACAGTTTGATGGGGTCATTAGTTCATGATCATCATGGCAGGAAGCAGGCAGCCATGGTGTTGAAGCAGTAGCTGAGAGCTTCATATCCTGTTTCACAGCCTGCACTCAGGCATAGTGAGACTGTGCCTGGCACGGTGTTTGAAACCTCAAAGCCCACCTC
ENSMUSG00000058690	Ccser2	E011	0.0283162	0.165086					TTCACTCTCCCTCCTCGGTACCGTCAGTAAATAATGCTTCAGTGAGTAGTACCACATAAGGACTGCTAAACAGAACTGTTCCCGAGGATAGAAAGCTTTCAACTAAACAGGCTTATGTTATCTGACTTGTGTTTGATATAGCTTGACTCCTAGCAGACTGCAATGATGGCTACGGCGAATGGTGTGGTTTAGCGTTTAGTGGCAAGCCACTCCCAGGCAGAGTTGGGAAAACTGTCTGGAAACCATGGCCTACAC	AGAGACACTTATATCTATCCACTCTTCAGCTTTACTGAAGGCCTGCTCACTTTCCTTAGGAGAATCAAATATATCCTTTGATGGTCTGCTCTCATGCTTTTCTTCTTTGAGAGTCATTTCCTCTGGCGTTATTCTAGTTCTGTTGGAGTCCTCTAAGTCTATGAAATCATCGCTGAAATCTTCACTTAAATCATTCTTGTCGGAAGACGACAAGGACGACAAGGAAATATCATCCACGTCATCGCTCAGGTACCT	CTGAGGGAAGAAAAAGATTAACATTTCTAAATAACATTAATAATGTGAAATATATTAATTACTTCCAGACAATTATCCATGACTCCTATACAAAATAAGCAAAATGTAAAGTTAATTTAATTTTGACATTTCGAATAAACATAGTACATTAATACTGAAAAAATAGACTGTTTTGTAGACCTGTGCTTAGAGATGACTGCTTTAAGCCATTAATGAATGTATCAAAAGGATTGCAAATTCAAATTAGATTCTGCA
ENSMUSG00000040907	Atp1a3	E001	0.0288314	-0.120479					TCCCCAAAGTTTATTGTTCTTCTCGTGCACTTGATGGTGTGAAGGCATGAGGGTTGACCTCAGTGACAGAGATGAGCACAGTGAATCAGAGCTGGGATGGTCTCAGTGCAGAGTCCAGATTTGTCACCTTCCCCATAGCTCTGGCCATCAACGAGTTACTTCCCTCCCTGCCCCTCACACTGATGAGTGTTAGGACTATGCTTAGGAGTGCTTCAGTTCTCAACACCACCATCAGGCTGTGGACTCCCTCAGGGC	TTTCTCTCCCCACTGATATATTTGATAATTGTTCAGAATTAGAACCGGAGATGGCATACGCCAGGAGACGGGGCCCAGGGGAGTAAAAAAGAGCCCAGGGAGGAAATGAGAGGCAGAGTTGCAAGGGAGAGAGGGGGAGAGACACAGAAGAGAGAGGGAGAAGAGAGGCAGGGGCTGTGGGGGGAGAGAAGCCAGCCAGAGGAAGAAGTGAGGGAACGTGGGAGGTAATCGAGGTGTGGGAGAGGAGGCTGGGCC	CTGGAATGACAGAAGAGAGTCAAAGTGAGAGGAAGGCAGACACGAGAGCCATATGAGCAAGAGACAGGGACACAGAAAGAAACATTGACACAAACACAAGGTGTGGTGGCAGGCCTGTCATCCCAGCACTGAGAAACTCAGGGACATGAGCTCAAGGGCAGCCTGAGCTACATAAGGAGAACCTATTTTCAGACACACAGTCGCACTTGGAAAGAGAGTGAAAGGCAAGGCGGGGAGAGAGGGAAGAGAAAGAAG
ENSMUSG00000028405	Aco1	E014	0.0300064	14.1013	recognized	99	recognized	462	CAGTGGTTCTGCTTCTCCAGTGATTTACTTAATTTTCTGGGGAAAAACTGAATCCATATTTTTCCAAGCATCCAAGATTAGAAAGCTAACCAGGCTTGGGGTCCCCAGTGTTCGTGTATCAAGGGAAAAAAAGTTCTCATTGAGTAGTCAGACTGTTTTCTGCAGTGATGGATTCTGGGTCTATCCTTCAGTAGAAAGCCCATCTCAGCCTGCAAGCCATATGTGAGCTACTCTACAGAGTAGGGAGTGGCAGAG	TTGTGGAGTTAGATCTGAAAACAGTTGTGCCTTGCTGCAGTGGACCCAAAAGACCTCAGGACAAAGTCGCGGTGTCTGAGATGAAAAAGGACTTTGAAAGCTGCCTTGGAGCCAAG	GTAGGGCCTCTGGACTCTGCCTGTGTCTTAGGTCCAGGCTTTCACAGCACCTTGTTATGAGTCTTCCTGAAGCCTTGTGCCAAGGGCATTTCTTCTCTGTCCTAAATGCTTTCATGATTCCCACGTTAGCTATGGGCCCTGTGGCTCCCCGCACTGTGTGCCTGCCTATAAATACAACCCGTTTATGCGTTTTCACAGGAAACCCATTTTCTACAGTGTCGTTGGCCCTATTCACACACACTGTTTAGGTCCCTG
ENSMUSG00000020745	Pafah1b1	E002	0.0300371	-0.0308127					CACCAGAGGGAAATCGGTCAGGTCTAGTAGAAAAACTGGCCAAGTACAGCCCTGCTTCTTTTGGTTGGGAAGACACCTTCCAACAGGAGGCACCAGCACGAGACAGAGCACCTAGAACAAAGTGAAGACTTACTCTGGTATATTTCATAAAACCTGACATTAAGGATGTTTATCTCCAAGGTAAGAGATGATAAATACAAAATGGGCAGGGCCCTCATCTCTGGAATTGAGTCTGTATCTCTAAGAGACAGTAAG	GTTTTATAGGCATTTAATAGTTTACCAATTGGTACAATAAGATTTTTAATATGCAGAAAACATGGATAAATTTTGTTTTACACAGTCTGAGAGCAACAAATCTTACTGTAAAACACAAGAGCAATATTATATACATTCCTTTACTGATTTTTAAAATTTTGTCGATATCTTCGGTGAACTCTTAACAATCTGGGAACTGTTTTCTCCAATGACCACCTCTGCAACGTTCATATGAAATCAATGTTTGCCTTCATG	CTGAAAGAGAAAAGAAAAGGCTTGTTTTCAAACCATACTAAGCCAGACAGAATGCTTTGCTTGCTTTTTGAGCAGTATATTTTATATAAGCCCAGCAGGCCTTGTACTTGATTCCCTCCAGGTCAGCTTCCCAAGCTCTGGGAGTCTATGAACCTCTGCCTCCACACTTGAATACAATGTCCACGATTTTCTCCATATACATACCCATCCATATCTCTAAAATTACTGAGCTTACCAACTGGATTAGGAATGTTG
ENSMUSG00000026393	Nek7	E001	0.0303997	-0.0343253					AATAGAAAGTATTTCACAAAAAAATTCATATTATTACAGTACTACGGGAATTGGAGGCAAAGAGTGCGCATTTGTGGGTTATAAACAGTACATTCAATTGAAAAGAATAAACATTTGTGTGAGTAACAGCTTCTTGGTTATAATAAATAGAGACAAAGTTCAGAGCAAAACCTGGAGTACATGATATAAGACAGGCGTTTTGTAAAGGACACACTAAGGAACAGCAGAGCGCTCGCAACTTGCCGGTGACATCTC	GGTGATTGTTAAGATTAGAACTTTTAATCAATTCCATAACCACTTGCAAACATCACACTGAATTTGTTTCTACACAATGGATTCTTTATTTTGGTGGGGGAGGGTGGATATGAACTGAGGGACTTAAAGTATTTGAAAGAAAGTTTCTTCTTGTACAAAGTTAAAGTGACCATCCCTGACCAGTAAGCCCTCCAGCTCTATTTTTTTTTTTTTTGAGACAAATTCATAAAGCAAAGTCACTACAAGGGGAGAAGC	CTGAAAACGAAACAAAGCAAAAGTTAAAATCAGCCTCCTTAATATTGAACAGCATAATCCTTCAGCACTGTTCATAGTGCTAACTATTCTAGCTATAGAAGGCTTCTACTTAACTGTAGATATGCACTCTGTACCTGATCTAAAATTTAATACATTAGCTTTGGCAAGCATAAGTTTTCCATATAAGGTGATAAGAGTACATGCCAGATATATTTATCTCACTATTTTGTATAGATAAAAAAATATAAAATTTTG
ENSMUSG00000036192	Rorb	E001	0.0304637	-0.0600314					AGTGGTGGTCAGATATTTGGGGTGTCTCATTTATTTTAAGCTTGTTGCAGCTTTCTACAGCAAATCCAAAGGACAGGACTGCTGTGGCTCTGCTCTGAGGTGGGTGACCTTTTTATGCAAATGCTGGGAAAAAAGAGTGTTGTTACTTTTCAGAGACATTGCTCCTCTTTTAACGATATGCCATAGCTGTGAAGAAGTACAACTCGTAGAAAAATGTCTATCCAATCGGTTCACTTTAACAAGCTCAAGCCGATT	TTTTTCTTTTTCTTCTTTTAATTTGTTCAGCATTGAGGGAGGGAAAGTCATAAACATTGATTGTCATTTACAGGAAACATTCAGAAATCATGTGTGCATTATCTGGGAATGCTAACAGTATTCAACTAATAATTTACAGGACATAAAATAAGGACAAACCCCGTTACATTCTAAAGTAATAGAAAACTCTTTTTAGTTGTTAGGGAGTGCTGCTTTAATCTATTATATTTATAATTAAAAAAATTCAATGCTTAC	ATAGAGGATGTCATTTATAACTGTGTAGGATAGAATTTTGGCATTGGGATATATTAGTCCCATAGACAAAAGATTTACTGTTTTCTAATCTGAATTTTTTCTATATTTTATAATATAGCATTTTGAAGTTGAAAAAACAGGCTCCCGCCTATTTTCTCATTTCTAACAAATTACCATGAGTATAATTTAGTGAATTTACTTCTTAACTTTGTATGCTCTATTTCTCTTTTTTTGTTGGGAAAATGGTTAGAAAAT
ENSMUSG00000041670	Rims1	E001	0.0311626	-0.109018			recognized	6	CAGACTTAGTTTATTTCAAGTCAGCCTACTGTAGGCAAGGTCTTATAAGCTAGACAGCGGATCAGAGGGAAAAGGCTAGGAGGAAGCCAAGATACTATAACAAGAGGTGCAAAGATTGATTCTTCAACTACGTCATAGAACGTGAAATGATTTGTCAAGTGGACGACAGAGTTGTCGCTTTTATTAGCACATTCAAACAGCAGCAGAGAAACGACCTTCGTTTGATTCTTACTGAGATTTATTGTCTTTAATAAA	ACATGAAAAGTAAGTTTTATTAAACATGTTTACATACATGAGTGGGAAGTCCACTTAAAAGCACAAGGGGTTGTTAAGACAAGTGGTCAAGATAGAAAGATATTACTACCCAATTTTAATCGGTTGATTGTTGGCCACTAAGACAGAACGGAATCTAGTAGAAGTGCACCAAGTGCTTCAGTTCTTCCTGCACAGCATGGTGGGTGGTGGTCAATCTGTGCCCCGTGGGATAATGGACAGGGAATTCTGACATGT	ACAAAATGCATGCAGCTTTGAACAGCTCCAGGTCATGCTGCTCTAACTGTGAAATCACAAAAAGTTGAACGACTCATAAAAGGAGAGGGGGTGCATATTGATGCAGCTGCAGGACCAAGCAGGCGCCTGCAGCACATACACAGGTCACAAGGGAAATTATGAAGAATATGCAAATTGGTATTTGGCTGTATTCTTTTTCTTCCCCCAAAGTAAGATATTGTGCATTTAAAAAAATCAAGCTTTGTGCTTGCATTG
ENSMUSG00000023830	Igf2r	E001	0.0316327	-0.268754					TGTGTACAGAGCACACACATACTGGACACAGACAATTCACACCCTAGGCATGTGGAGTGGCACACATGAATCCTGTCTGTTATCTTTAACTGGTCAACAGAAGCCACAGGCAGCAAACAGTGACTTGTGGGAGCTTTCTGCTTCCAAGTCAACGCTCGGCGAGCTAAGGTGGCAAGCAAGCCATGCATTCACTTGATGCATTCACTTGGGCCTTTCTGGTCACTAGAAATGAATGGCAGTTTTGCTTTGGCAGAC	CTAGTTAATAATTTATCTTTATTGAAATTGAATACTTCATATTACAGTCAAGTTGATTAAAAATGAAGAGAAAAATCAATTTTTAAAAATACACTCAATGTGAAATCAAATAAGCTAGCAAAATCAGGCATAAACCAAGAAATTCTGCGGGGTACTTTGCTTTTGGGTATGTAAATGCCACCTATATACAACTCTATAATGTGACAAGTCACTGAACACATCAAGAAAAGAATCCACAGCCAGTGGACTGGGCCT	CTAACAGGGAACAGAAGCAGAGACCATGAGACTCAGCAAAGAGACCTGTCTGCTGCAGGAGAGCTCTCCTGATACAGGCCACCCCAGGGCCTCTCTCTGGGGTATGAGATGAGAACCTGCAAAGTAGAGCCTGTGGCAAGAGCCTCATAGCCAAATGAGCTGGCCAGGCAGACAGGACCTGACAGGGCTCATGACTGTTGAGCAGTGCTGGCAGAGAGGGACTCTCCTGGGCCACTGTATCTAGGGACTGGGCGT
ENSMUSG00000017390	Aldoc	E002	0.0319238	0.219902			recognized	112	ACTCCATTCACTTACTTTCCCCATCCCCCTTGGGGGTAGGCACTGGTAAATATGGGGCAGAGCACAGAAACTCAATTCCATTATTCCATGTCTTGAAGTGGGGCACTGTTAGGTGGGCCTCTGCCCTACCTGCTGATGTTTAGAGATCTCTCCTCTAAACCAGGCTTAATCCCCAACATTCCACATAATGCCTTACACAGCAAAGGACTGATTGTGGTAGAGACAAACACAAGTCCATCTCTTCCCTCTAGGGCC	TGAGCTGTGCTGTGGCTCCCGCGGCTGACTGGCTGAGTGACTGGCTGAGTATAG	GTAAGGTCTCCAAGCGAGCCTGAGATGCTCGCGTCCGGTTTGTCTTCCCATGCTGTCCTTGCCCTCTCCCTGGGACCCAAGTTCCTCTGCTTTCTGTGGTTTTGAAACCCCATGCATGGCTCAGGAAAACCGTGCTTCTCTTCTTCCTTCTAGTTCTCCTTTCCAGTTCCAAGTCATATGCCTCCAGGACTTTTTCATTGGGGTCAGTGCATTCCACCCAGGACATTTTAATCTCAGTCCATTTCTGGTTCTTCT
ENSMUSG00000034035	Ccdc17	E011	0.0319238	-13.7948					TGCAGGGAGCCCTGGGGAGAGGCTGCGAGTCTTGCAGGGAACCCGCGCCAGACGCATGGCAGAAACAGAAGCACAGAGCCGGGCGCTGGAGCGTCGCGGCGAAGGTGAGAGGTAAGGACTCGGCCCTGTCGCTGTGCTCGGACTCACCCTGACTCTGCCCATTTGTCCCTCAGAATTAAAACGGCGCCTCCACAGCGTGGCGGGACCCAAGGGAGGATTACCCCGCCCATTCGACTTGGAGCGCGAGCTCAGAGA	TGAGGACCCCGGCCCTGGGTGGACAGGATCGGGAGTCTGTTCAGTCTGGGAGATCGCTTTCTGCTGCCTTCTTGCTAG	GATCCTACGTGAAGCCTACGTGCACGGTGGAGGCCGGGACCCAGAAGTTCTGGACAAAATATTGCAGCTGCAAGTGGAAGCGTCAGCCCTGGAATTGCAGCGGTCGCAAAACCGCAAGGGTGAACGAAAGGGTCTATCATAGAGGGTTTCTACACTGATGGTCCTAGAGTTGGAAGGAGAAAAGGGCTTGAGGGAGAGCACCACTAGAATGGGAGGCACGTAAGCCCAAGGAAGGAAAACCCATTGCCAGATGAC
ENSMUSG00000039686	Zer1	E034	0.0319313	0.342584					GTTGGGGCAACTGGTAACTAAGCATTCAGGAAGGACATGCACACTGTGCTGTGGGGTTCCAGAGCGGTGGGGATCCACCAGGAGGCTGTACAAAGAGCATCTGCGTGAGTCAGTCTCTGATCACAGGTCTACTGTTCTGATCTTGACACACGTGTTTATGTGTACGTAGTTCAGAGGTGCAGGCACAGGTGCGAGCACACACACAGGAGCACATAATGCTGGCCCATGTACATGCAGGACTTTATAGTAACTTAT	CATTGACCAGCTGGTCACAGATTTCACTGGGCAAGAAGATGTCTGGATGCAGCCGCAGGGTCTCTTTGTCCAGGAGGTAGCCCAGGGTGCCATCAAGATTCCGGAGACAGAAGTCAGTACAGAGGGCCATCAGGGACTCGGGCGTGTCAGACGCCATGCTGGGAGACGGCAGCAGCGGCCCACAAGGGCAACTATGGATTACCAATAATCACAAGATCATTGGCAGAGCCACAGC	CTGGGAAGGAGAAAAGCAGCCAAATGAGATGCAGATAAGAACCTGTGTCTACTTCTTGATTGGTGAATGGGGAGCCCCATCCATCCATCACATTCAAATCAGGACCTTAAAATTTAGGCTGTACAAACCTGTAATCCCAGCACCTGGGAGGCAGAGGCAAAGAGGATCAGGAATTCCAGACCAGCCTGAGCTTTTGAGCTCAGATTGAGTCCCTGACTAAATAAAAAGTTGGAATATCATCCAGTCACAAAAAGT
ENSMUSG00000026193	Fn1	E031	0.0323541	2.29078					ACACACCCACGCACGCACTCACACATGCACACACATGCACACACACCTCCAACCACTTAAAATGGAAGATTTAAGGTGGTACCAGTGTGATCAGAATTTTCCCCTTCCACATCTATACATCAAAAGAAACACAGAAGCCAAGGATGACCTGTGATAGGTGCCTGGGGTCTACTCCACCGAACAACAATGGAAGTATCATCAACCTGGTCCACGGTAGGGTCTGGAGGAGCGTCAGGTGCTGAAAGAAGAAGAAAG	TGTAGTCTGTGAGGTAGACAGGATCAAGCTCTGTTTTCCCTCCTCAGATATCTGATAGACATTGACAATGTACTTTCTGCCCGGGAGCAGGTCAGGAATGTTCACGGAAGTGGCCGTGCTTGGGAGAT	CTTTAAAATACAGGGCAAAGGTTAGTGGCCTGAGCAAACCAATCTTCCACGGCTTCTAAGAGCGCTATACTCAGAGGGTGAAAGCCCACGAGAAATGTTCTAGTGAATAGCCTGCAATTTCCAATGTAAGTAAGTTCTTTCATTTTCCACTTTCCCCCACCCCCGAAGATGTATAATTTTTAATAACATCTCTCTGTTTTTTTGTTTTTTAAAACAGAGCTGTCATTAGATATCAGAGTAGTAGCCATGGTGGAA
ENSMUSG00000030990	Pgap2	E064	0.0324633	-0.308567					TGGTTTTGGTAGTGGGCAACGGTCTTGGGCACTGGCTGTCACTGGCTGGTAATGTGGTGATTTAAGAAGCCACTAGAGGGTAAAACAGGAGGTTTATCATGTTCCTTGTGTCCTCCTAACAGTGTATACCATCTTTGCCATCCTGGAGTACACTGTTGTCCTAACCAACATGGCGTTCCACATGACAGCCTGGTGGGACTTCGGGAACAAAGAGCTGCTAATAACCTCTCAGCCTGAGGAAAAGAGATTCTAACC	TAAGGTTAGGGTTCAGAGCAGTGGCTGCTACCTGAAGACCGCAGCCATTTCTCTCTGGTCATTCATCTGAGTGATGTGTCTAGTGATCTACCGTGCACACCCAGAGTGTGTGCACCCAGGTGGTAGGTCCATAAATTTGCCCAGGTGTTCAAGATGTACCCTCTTCCCCATCAGTTTCATTGTGTTCCTGTGTGTGTGACTGGGGAAAGTACGCTCTATGATTTCTAAGGGCTTTGTTTCTTGAGGTTATCCAGT	AACAGTCTGAGGTAGGTATGTTGCTCCTGGGGCTCAGCTCTGCGTGGGACCTGAGGTGAAGAATGGGCTCCAGAACGGAGGGGTTAAGTCTCCAGCAGCTCTGCTATCTCCCTTACCCTTGCTGCCTAGGGTTTCCTAAGCCACACCTCAGCCTCCATTTGGGTGAACAGAAGTGGCTCGACCATCTCCGAAAAGACAGCCTGGGAGCTGGTTATGACCGTAATCCTGTCAGTGAAGACCTCTCCCCTTGGAACT
ENSMUSG00000005886	Ncoa2	E021	0.0327282	0.222835					TGCTCAAGTCTGTTCTGAGCAAGCCCTGGTCTAAGGAAGGGATTGCCAGCACTCTGGGTTCAGCTAGCTACAGTCACGCTGCAGTTCCTCCTGCTCGCCATTGTTACGCATGACCTGTAACCCAAGGATGAATTTACCCTGCTCATAGAAAGAACAATGACTGCCCCCCACCCCCCCAAAAATACTTTGTGTCCATCCCATTGTCTGCCCCAGGGTCTGTAAGTATCTGTAAAACTGTACAGAGCTCAGCCATAC	TGGTCACTGGGCTCAAAGCTCACCTCCTCCTTCACAGTTTTCATAGCAATTAACTTTGTGTTACTGGCAGGATCTGTCTTACTGTCCAGTCGCTCGAGTTTGGGGGTTATTTCCGGTAAACCAATATCTTTAGTATCATCTTTGTCGAGCAAATAGCGCAGTAGTGCATTCTCTTTCTTCTTGGGGCTCGCTGGCTCCTGTTTGACAGTCACTTCCGACCCAGGAGCTGTGCTGCTGGACTCCTGGCTCAGCTCT	CTGTACAATGAGGAAAGAAACATATATAAGATAAAAGAGAAATACAAAGTAAACTTATTAATTAAAAAAATGGCAGGGACTCTTTTCTTTACAAAAGTGGACTACATTTAAAAGATGCCTTATGGCATCTTATGGGCTAGACTGAACATGTACAGCTCTGGACTAAGGGATGCTTTCAGGCAACGTACCAAGATGTCTGTGGTTTTACTGAAGTGTGTGTATGGAGCTTAAATTAGACTACCCCCATATTGAAAT
ENSMUSG00000038530	Rgs4	E001	0.0333705	-0.209045					GGAAAAGAAAAGCTGTGCCTGTCACCCTAAGACTTGGGAAGATGAGACAGGAGGATTGCCATGAATTTGAGCTCAAACTAGTCTTCACAATTAAGTTACAACCCAGTGGACTACAGACTGAGTGAAACCCCATTTGTTGGTTTTGTTTCCTTTGTTTTATTTTGATGTTTTTTTAGATTTTTGGTGGTGGTATTTTGTTCTGTTGGTTTTTGTTTTCTTGTTTTGTTTTGTGGAATTTTCTTCCCCCAACCCCAA	TGTTTTGTAGGAAGCATTTATTTACTGTCATCATTAAGATTTGTGTGTTTCGTCGGAAGCATCAGTGTTGAGGCCTATAAAGCACATGGCAGAAGCAGACATGCATATGGGAGGAGCATTCCTTACATGGACCAGCGGCAGGCAGGCTCACCATTCCAAGGAGCGATGGAAATACAATTGAAAACACACTCAGGATGT	ATTACACAAAATAATTTACTTCTCATTCAGAATGACTTTCCAGACCTATTTGTGAAACAGCAGTCTGTGAGTACAGGTACAATCTCAAAGTCATGATACTATTAGGGCAAGACCAAAGAGTTATACAGACATGATCATGGATGGGGTGTATAACAAAAAGGAGTTAGGAACACTGATGGGGGAGCTCTGGGGACATTACAAGCAAGACTGTCAAGAGAGACGAAACGAGTACCCTTAGAAAATTATTTCTTCAAT
ENSMUSG00000033565	Rbfox2	E002	0.0333932	-0.024934					GTAAGGAGAAGGAAGACGCCAAGGTTACATATCTGGCAGCAGAAATCCACTTGGGAGTCTGGGAGGATCTCCATGCTTCCTGTGACTTAGAAAGGCAGTGATCGGGGAAACTTTAGGTATCTGGGATATCGGCAGAGAAACGACCAGGGAGTGGTGGTTGACGGCCAGTCTAACAGCAGAGGCATTCCCCACGGTGATGGGGATCAGGAGACAGGCAGCAGAAGCCAGGGAAGCAGGCACTTACCTCAGGAGTGT	GTGTTTCTCTCTTTTATTTAAAAACAGTGCTTCATTACCATTTGCAAAGGCTGAGGCAGGGCCCCTCCTTTGCTAAGAGTTTATAAAAGCCAGCAACATGATCAATAATTTATACACATGGAGAGTAATACAAAAAATAATGAATAAAAGCTAAAGATCTAACTACTCAACCTTCACAATTCCAGCTACTTGATAATAGGAGTAACCCAATGAATACTGTATGGTCTGAAAGCTACTATACAATATGATTCTTAA	CTGCAGTAAGTAGAGACATAAGAATATTGAAAGAGTGAGAAAAGCATAGGAAATGAAGCAAGATGTCCAGAGAGGACAACTCTCTCTCCTGGCAACCAGACAGTGGAGACATCACAATGGCTGACTTCACAATTATATGACTAGGCACAGAGAGTGGACCTGATATGGTTTCTATATGCCTATCTGTCTTTGTAATGCTGCTACAGTCCTGGCTGAAACTGGATTGCTGACCTCCCTTCAAACATATGACTGTCA
ENSMUSG00000057738	Sptan1	E007	0.0333932	0.156738					TAATCCCAGCACTCAGGAGGCAGAGGCCAGCCTAGTCTATAGAGCAAGTTCTATGACAGCCAGGATTACACAGAACACCAGTCTCAAAAAACTTAAAAAAAGTAATTCAGACATCTACAATTCAAAATCAAGATAAAAAGATTTGTTTTGAGTAACATTTATGAATTCTTCAAATATCAATCTTTCCTTTGAATCTTGAAGCCCCTTAGCTCTTCACTTTAACTACTTCACTTTTTGTTGCTATCAAAACCATCC	AAATGGATCCAAGTGGGGTCAAAGTGCTGGAAACAGCCGAGGACATCCAGGAGAGACGACAGCAAGTCCTGGATCGGTACCACCGCTTCAAGGAGCTCTCTACCTTACGGCGTCAGAAGCTGGAGGATTCCTATCGGTTCCAGTTTTTTCAAAGAGATGCTGAGGAGTTGGAGAAGTGGATTCAGGAGAAGCTTCAAGTTGCATCTGATGAGAACTACAAAGACCCAACCAACTTGCAG	GTATGTCTGAGTACCAGCAGTTCTTGCCTCTCAAAAGTCAGGGGCCCAAAAAAGGTTGGGTAGCTATAATGTAAGTCAGACACATTGTAAAGACCAACTCTGTGCTCTGAGAAGACCCTAACATATGAGGGGTTGGGGCGGAGTAAGAGTGGCTTTCAAGCATGAGGTTTTCTTTTCGGTATACTTTAAACTCGTGATTCTCAACCTTCCTAATGCTGCAGTTCCTCATGTTGTGGTGACTCCCAACCATAAAAG
ENSMUSG00000041268	Dmxl2	E034	0.0334951	0.113445					TCATTTTAATCACACAAAGAAAAACAAGACCATCAGAAAACTAAGACAAACGTTTTGCATCTAAGTGCTCAGTGAGAATTCACAGACATCACAAATCTGTATGCCGCATATGCCTGCCTCAACTGCCTTTTCTTTTATAAACAAGCATGCTCTATAATAATTATCCGTAGGTCTTTTTTTTCTACAAGGATTGAAAGAAAACATAAGTCAACATATTAGTCATTACACAAATAACACAATGTGTTTATTAACTAA	GCTCTAAATCAATATCATCTGTTGTTATCTCCTGGACTTGAAACAGCTCTGAATATTGATCCTCTGATTGGCTTTCAATATGGTCCTCATAGCTCTGTGGCTTTTTTGTACTGTCCTCTGAAATTCTGTAGGATGTGTCCTGGTCTGCAGCAAGCAATGCGTGTAGTGGTAGTGGAGGAATAGAGTCTATCTCGGTATAATCCCGAGTACCATCCTTCCCAATGGTAACTGTATCCTTTGCTGTACTGCCGCTCA	CTTTATAAAAAGGAAAGAAAATTGTCATAATCAAAGAATCACAAAATGTGAGATCAATAGATCTCAGACTCTTTACCAGGTTTAATTTACCGCCTTTCAATGTTGAACCAGAACCCTCCTGTATCAGTCTGTGTGCACTTCCCATCCATTATTGCCTGTAAAATACTGACTAAGATTTGGGGTCAGAAGACCTGGACGCAAGTTCCAATACATCAATACCCTTAGAAGAATGGGGAAACATTTAAACAAGTAGTC
ENSMUSG00000066571	4931406P16Rik	E002	0.0341635	-0.162282					GACAGACACAGTAGGGCTACCATCATCACCACTGATGTAAACAGAAGCACTGGGTACTTCATCAAACAGGAACACACTCAGTGTCCGTCTTCCTGCTAGTTCTTTACTTACTGGCACTGGGGATTCAACTCTGGACCTTCGGCTTGCAGACCAAGTGTTCTACCACTCAACTACAACCCAATCACCGTAGTTTTGTTTTCAGACAGGGTCTTATGTAGTCCAGGCTAGCCTTGAATTATGTAGCCACAAGAACCT	AATGTATATTTTAATAAAGCCAAGTTATTTTACTTATAGGAGCTTTAAAAGTAAGATACAAAATGTAGAGTTCCAGTTTTGGAAGGTCACAACTATTCACATGATGTCCTGCTAATGCCGAGCAAGGCAGCCATGCTTGGCCGTGCTGAGGACACACTCACACGCATACATGCGCTTTGGCAAGACACCTCTGCCAAGCGCAGCACCTGGAATCACCAGTGTTTAGAGCAAGGTGGTGCTTCGAACAGCACCCAT	CTGGGAAACAGAAGAGAGATTTTAGGTTTAGAGGTTTTAGAGGTTTTGGTTGAGTTTTCATTGTGTGCCAGCCCACCTAACTCCCAGAACTCCAACTCTTTCTACCTAGTGGACAGAGTGAGAACAGCTGCCCACAGCTTGGTACAGTGATATCAGTGCTCAATGCCTGCACAATCCACACAGCATTCTTGCAGCCCAACTGTGGAGATGAACTTGTGTTTCTGCACATATACACTTACATGTGTGTACAACTTT
ENSMUSG00000031778	Cx3cl1	E005	0.0344291	1.13807	recognized	27	recognized	72	TGGGTTCTAGATGTTTGATATAGCCTTTACTCAGATCTAGAACCCAAGCTCTTCACACACACACACACACACACACACACACACACACACACACACACACACACCATTTTCCATGAGTTTACACTGGGGCAGATGATAGGACACTCTGCTGGAGATTTAGATCAGAGGTTCTCACCCATGGGTTGTGATGTCTTGGAGGTCAAATGTCCCTTTCATAGGGGTCGCCTAAGACCACCTGCATATCAGAATTCATAC	TTTTCTCCTGAACTCCTTATCCCAAACTCATTCTGCAGAACACAGGGGGATCTGCTCAGCAGACACTCACACACTTCCCAGGGAG	GTAAGCTCCCCTATTCAACACAGACCCTTACCTGATCTATGCACCTGATCACATGTGTGTGGAGGAGGAGGATGCATGTGTAGGGTGATTGCTGAGCCCTTGACTTAATTGAGCACAAGACAGGGATGAGCAAGGAAGGCAATGCCGTAGGGGTGGAACAGGGCTGGAAGAGCGGGACTGCACCATCATATCTCCCTAGATTCCTCTCCCCGCTATGACTTCATTTTAAAAATTAAACGTTTCCAGGCCAGGAGT
ENSMUSG00000035093	Secisbp2l	E001	0.0346863	-0.0407321			recognized	437	TGTGCACCTGGGCACTCTGTCCTAAGACACAGTGAAGCCACGGCTGGGGCGTGCATTCCAGATCTGCCATTTACTGGCTGTCGGATCCTGGATAGTTTCTTAGTTTCTCCACAACTGTATCATTTGGAAAGGACAGAAGTCTCAGACATGACAGGGCTTCTGTGAGCCCTGAGGGTCAACCACAGGGAAAGGAGGGATCTACAGGAGCTTATGGGAGTCTACACCACAACGGTCTGTGCAGAAGGCATTGCATTG	TCTCTCTTGGTATAATCCATTAGTTTTGCTAGTTTTTATTAGAGCACTACAATTAAGACATTAAATTATAAATTCAGGTGGTATATTTAGAAATTAAATTACAAAACAATACAAATACTTTTAAGGTGTGATGTGCCAACAAAGTTTAAATGCTATCATTAACTGGGGGTCAGTTTTAGATTCTACAGAATCCCTGGTGTGTACAAAGGTTAAAGGAACAAGGGAGATGGAGAGATGTTTGCAAATAAAATATTC	CTACAAGCAGGAAGCAACATCCGTGAGAACCAGAAACACAGTTTCAGAGGCGTGGAACTTATTTAAAACACTAAATGAAGGGCAGGAACAGAATACAGACATTTGTTGGCTCATAAACTGAATGAGAAAATTAAACATTTAATTTGCTCTAAAATGAGCTTAAAATGTAATAAAGTTCCAAAATAAGAGGCAGGAACAGAATATAGAAATTTGTTGGCTCATACACTGAGTGAGAAAATTAAACATTTAGTTTGT
ENSMUSG00000027288	Zfp106	E033	0.0347862	0.0945472					GGTAGTTGAAAAAATTGACCACTAGCAGGGCGGTGGTGGCACATGCCTTTAATCTCAGGCAAAAGCAGGCCTTCTCTGAGTTCGAGGCCAGTCTGTTCTATAGACCAGACAGGGCTATATAGAGAAACCCCATCTTGAAAACCAAAAAGCAAGCAAGCAAACAAATCAAAAATTTTTACCATTGGTTCCAAACATTAAGATTCAGAGACAGCACATTCTAGTCCATCTGAACTAAAGTGACAGATTTCTGATGAC	TGGGTAAGCCTTTGCCCAGCTCTTGCTTTTTCTTGGTTACTTGCTGAATGACCTGTTCCCAGTTGACATTTCTCCTTGATGCATTTAGAATCTGTCGTAGGGTTGGCTTAAGCCCAGATTCCTTTTCTGTTTCATTCTTTCTATGGCCACTAACATTGCGAATTCGTCGAGCGCTATTGAGGTTTGGCTCTGGGAGATGTGTTCCTGTTTTGGACTTCAAACTGATGTGTCGGCTTAGATCTCTCTGGAGCGAGG	GGAAAGCCACCTGTTCCTTCAGAATGCCAACTGGAATTCCTTCCTGTACCATTATAATTCCAATCTACCATCCCATTGTTTGAATGCCAGCCTCCTCCAGAATTGCTATGATTAAGGAACCAAGTTGAAGAGCCTCTTGTAGCACCTTTATGCCAGACAGAACTTCCTCTTGGTCCACCACTATTCCTCAAAGAATGTGGAAAGCTGTTTTTTCTAGTACTATTAAAGCCATCCTTTTCCCATTTCCAGTCTCTC
ENSMUSG00000007653	Gabrb2	E016	0.035205	-0.0426171					AAATAATGTAATGATAGTCGCTATACCTTGCTTGATTCTCAAAATAAATATAGTCAGTAAATATATGTTACATAAATGTGTGAATATAATTAGGTGACTAATTCCCTACCATTATACCATACATAATAAAGTTGAATTGTGCATCTGTTTCTGTCAAATAAATAATATAAATTATGTGAAGGGATGGTTCTTGACTTCTATTTCTCAGCATGGGGTAAGTAGAAATTATGAAGCCGGTGCTAGCTAATCTATTAT	TGGACCCCCATGAGAACATCTTACTCAGCACGCTTGAGATAAAAAACGAGATGGCCACATCCGAAGCAGTAATGGGACTTGGAGACCCCAGGAGCACAATGCTTGCCTATGATGCCTCCAGCATCCAGTATCGAAAAGCTGGGCTGCCTAGGCATAGTTTTGGCCGCAACGCTCTGGAGCGACATGTGGCACAAAAGAAAAGTCGCCTGAGGAGACGTGCCTCTCAACTGAAAATCACCATCCCCGACTTGACTG	TCTCCAGGGCTTTCTCCTACGAAATTATATAAGGGGGATCACAGTAATAAAGTGCCTATCCCTTGTCAGCAGGGGTGACCTCTGAATGGAAAACTACAGGAAGAAGCGTCACCTTAATCTCAGGGGCACACCGTGACATGCCATTCGGAAACAACTTTTCTAAAGACAACTCAGAGCCTAAGCCTAGGCTCCCCTTAGCAATTTCCATAAAAGCCATAACAAAATCCTTGATATTGTCATTTGTGATTGTAACCA
ENSMUSG00000024617	Camk2a	E030	0.0352593	-0.0728941	recognized	30			CTGGAACTGGAGACCTCACTACCCTACTTCCCAGGAAATCTTTCCCGTATCCTTGTGCTATCTCTCCTCAGCCCAGCCCCCACTCACCACCTTCTAGGCACATTATTCTCATCACCTCTCTCAACTTGGCCAAGCAAGAGTGCCAGAAACTTATTTTCCTACTTCATGCTGAACTTGGCCTGGTGTGCGCTCTATTGTGCTTGCCTGCCTCCCTGGCCTTCCTCGACTCCCCTGCCCCGACATACACACACACAC	AAACAAAAAACAAAAAAGGAGAAAAACACTCAACAAAATCAAACGACACGTTTTTTTTTGGACAAAAAATAATAACATTCAAGGTAATAGTCTCAGTGTCCAACTTGGACTTACGTTGCTGCCTCTCCGTGCTTTTGGTCTCTCTGTGGCTATGTTTTGCCAGCATGAGACCCTGTTCCCTCTGGAAGTTGCTAGGGGAGGAAGAGCCATGCGTCCAGGGGTTTGGAGACAGCTTTATCCTCTCGGCTTTTCTGA	TAACTTGGATTACATGCTTAAAGGCTGAGCCAGTCGTGAGATTGTCTGGACCACAAGCTTGCACCCTTAGGACTAAGGATGGAGTCTGGGTTTTTTTTTTTTTCTTCTTTCTTTCAGGCATTTGGGTACCCTTAACAAGAATTGTTGGGGGGTGGAGTGCCACAAAGAGCCAAGAACTCAAGCCTCTCTGTGGAGCCTTCAGGGTCTGTTAGCACCTCAGTTTCCTTTGGACAATGAGAAGGGTTCTCCAAAAGA
ENSMUSG00000027748	Trpc4	E002	0.0352593	0.586525	recognized	59			ATAATTTCTCAAAGACTCCAGCTGAATTCTCAGCTAAATGTTACTTTAAAATTTTAAGATATTTTTCTACTGTTAGATTGGATGTTGTTGGGCTTGCAGAGATAGATGGCTCAGTGGTTAATAGCATTGACTTCTCTTACAAAGACCCTGAGTTCAGCTCCCAGAACCCACATGATACCTCATAACAGTAACTCTAGTTCCAGAGAATTGCGTGCTCTCTTCTGACCTCTGTGAGCACCTGCGTGTGTATGTTGT	GATGATGATGGACTAGCATGGCCTGAAGCATGGCTCAGTTCTATTACAAAAGAAATGTCAACGCCCCCTACAGAGACCGCATCCCACTGAGGATTGTCAGAGCAGAATCTGAGCTCTCACCATCAGAGAAAGCCTACTTGAATGCTGTGGAGAAGGGGGACTATGCAAGCGTCAAGAAGTCTCTGGAGGAAGCTGAGATTTATTTTAAAATCAACATTAACTGCATCGACCCCCTGGGAAGGACCGCCCTCCTCA	GTGGGTGTGAGTGTGGTGTTTTCAGTTTATTTTGCCCATAGGAAGTTTCTTTAGATTTGTAAACACCGTGTGTGTGTGTGTGTGTGTGTGTGTGTGTGTGTGTGTGTGTGTGTAAGTGACTGCTAGAAAGAAGCTCAAATTTTCCCTTAGCAGGACTGCAACATATTTACCAATGGCAGACATGTGGTGGCACTTGATTACTATGAAAAGAAAATAGATGTAAGTTCAGTGCCGTGTGTCTTGCTTTCTCTCTGC
ENSMUSG00000033943	Mga	E055	0.0352593	-0.136746					AATTGACCAGGAAGGCCGGGGGAGCAAGGTGATGCCTACATTGGCACCTGTTGTACCTAAATTGGGCAACTCTGGAGCTCCATCAAGTTCATCAGGGAAATGAGCTTGTTCATCCTCATACAAAAGCCAGGCTGTGAGGGGAAATGAATTTCACCTCCTTTCTCTGTAGGCGTCTGTTTGTTTGTATTATGGAACTATTATCCTTGACTTAATTATGTGTGAATATTGATGGAGAAAGGAGGTGTAGGGTGCTGG	GGAAAAAAAAAAAAAAAGAACTTTTAGTTACTATTTCAATAGTAGGGCATGGTAGGACTGGGCATGGTAGTGCACACTTGTAATTCCAGCACTTAGAAGACTAAAGCAGAAGGATTGCAAGTTTGTGTCTACCCTGGCCTATCAAGGGGACAGACACACACACACACATACACACTTGTGGGGGCCAGGGGAGTAGGAAGAGAGAATGTTATAGTAGGTAGGATGAATATTATGGAATACCAAAGTGAAGGGATT	TTTGGTGTTGGGAGGTTTGTGCCTGGTTGAAGAATTCTTTATGCCCTCAGACATATTTGAGAGAGGGTTCCATTGAAGAGATCTTTTCTGAAGCTTCTTGACTGGAAAGCTTTCGATCTGTCATTTGGGAAGACCTTTGGTATTCTAGTCCTTGTAGCATGTCTCAATTGGAACTTCAAGATTATGTACAATTTGATGGCAAATATTTGCTGTTCCATAGTGAGAATAGTTTCATAATACCACTGTCTTTATCTG
ENSMUSG00000001227	Sema6b	E009	0.0354007	15.5579	recognized	252			ATGGATGGATGGATGGATTTATGGATGGATGGATGGATAGATGGATTTATGGATGGATGGATGGATAGATTTATGGATGGATGGATAGATTTATGGATGGATAGATTTATGGATGGATGGATAGATTTATGGATGGATAGATTTATGGATGGATGGACTGTAGCCAAACTCAGGCTAATGGCTCTGGGAAGGGCTAGAGAATAAATACTTGGGTCATGTGTCAGTGAGACAGTGTTGAGGGATGCATGATGGACA	TTTTCCAGGTAGTTAAACTCCATGGCGATCTCCCGGAAGAAGAAATAGACGTGGCTTCCCCACTCCACTGCATGCACAAAGTACGGCT	CTGTTGAGAGAAGGTTGGGATATAGCCTTACTCATCATGAAGGGGTCTCTGGGGCTCTGAATGTCAACAGAGCAGACTGTGAGCTGTGCTTTTTATTAGGAAGAGACTTAGAGTGGTCACTTAGCCAAAATGAACTGAGCCCAGTTTGGTTTTTTTTGGGGGGGGAGGGGTGAGTGGGGTCATAAGTTAAAAAAAAAAAATCATGTCCACCACTGCCATGCAATCTGCCATTCTGCGAAATTCCTCCCTATTTGG
ENSMUSG00000049184	Purg	E003	0.0354007	-0.110556			recognized	430	AAACTTGGAAAACAAACGCATGTATTACAAGTATAGCAATGAATTGTAACCTTACCATACAGTACTGATACTCTACTTTCAAATATGTTTCACTGTTAAATATAGACAACATAACGTTACTGCTGTACTGTTACTGAGTACTCTCTCCTAAAGGACCCTGTTATCACTACTCCAGATTAGATGTGGGGCAGACACATGATTGACTCCTGTGTCTGTATAGACCCTACCAGGTATATTCTTCTCTTGGTGAGTAAA	TCACAAATTACCCTAAATCCAGAGAGAATCTCAACCTTTTTCACTGTTGTCAGACCAAGCATAAGGAACAGCCCTATGATACTCCAAAGACAGTTGAGGAATAAGGACTAAATCCCTTATGTTACACTGCAGAATAAAGGCATTCGATGAAAGAAATGAACTGAAGTTCATCATGAGCGCAAGGCTTCTGTACTTGGCGTTCCTGCATGGAAAGGAAAACAGGTATGGACGCCATTGGCATCATATTCACACTGC	ATTAGTTTGGATTCTTATTTTTCAGAAGTCAACTCAGTCACGCTGGACCCCCAATGCTGATCTTATATGTCTTTATTTCGTTATTCATTTGTGCCTGCAAATTTATGTTGTCTCAAAGAATTTAAATCTAGTTGGTCTAACTTATGAAACCGTGTTTAGAGAGAATCCATAAAACCAAGCCCTGTCAGACCTAAAAATAAGTATGTTGCAAAGACCAAACATGGGCCTTTGTCTGTTTTAGTAGTTTATTGATAA
ENSMUSG00000038990	Cables2	E010	0.0355237	-1.02078					AGGGCAAGGCTCAGGTCTGAGAGGTGCTCCAGGTCACAGGCCAGCTAGGGCTTAGGTCCAAGAAGTGATGCCTGGACAAAGCCTGCCCCCTTCCCGTCCCACACTGACCCTCTCTTCTGCCTGACTCAGGCAGAGCCTAGGGCCACATTATCTGGAATCCTTTCCTCTGAGAAGCCTTGGTGCAGAGGCATGAGTGTGGCTTATACTGCTGTCTGGCCCATGGCTGTGCCTAGCCCAGACCTTGGCTACCTAGTT	GAGCCTGAAGCCATGCTGCTACCCAGTCGGAGTGGGTACTTTCAAGGTCAGAGCACTAGCTTCCATGCCTAATCTGTGGTCTGTGGCCAGGCTAGTCTCTGTCTTGGAAGACCCTTGGCCTACTTACTGGTCCAGAAGCAAGGCTCTATGTGGAGAACCCAGGGGAGCAGTTGGGTTACCCACAGCTAGCAGTGGCTGTGTATGGTGTACTCTTAGGCACTTTCTCTGGGTGGCATGAGCCAGCTAGTGACAGGT	CTTTCCATCTGCTCCCAGCTCAACGCCTTCCAATTCAAAGACCATCTCAGAAGAAACAGAAACGCCGCCGGATGGGTGCCTCTGCTTCTGGCTGTCCACCCTCAGGTCACTGCAATGTATATGAGAGGGAGGGCTGTAGTCCCTCTGTCTGTGGTCAGTGGGTGGGTGCTCGGCCCACCGGGAATCCACCCACACAGAGTGCTCCTGCCACAAAGTCCTCAAAACAGGAGAAGGGGGCGGGCATGACCTTGGAGG
ENSMUSG00000060657	Marf1	E025	0.0355237	0.223372					GTTCAAATCCATTTGATATGAAGGAGATCTTACATGCACCTACTATAAATGGCAGAAATGCTTTCCTTTGAACACTAGTATGCCTGGAGCTGAGTTTCAAGTTCCTCATATTACAAAAAGACAACGTGTAGTTACTTTCCTGCTGTGAAAGGCCCCATGTATAAGCTGAGTTTAAGTTAAAAGAACTCGACTAACTGCATACTAGAGAAGGGTGAAACAGATCACAGACTGCAAACTAAGGTGTCCTGTAGGACA	TTGTTTAGACAGTCTTCACAGTAAAGTGAGCCCTTTAAACAAACCGGAGGTGCCACATTTAGGTGAAGAGAGTTGGTGCACAAGTGAGGTGTAAGCTCTGAATGGGAAAGGCGCTCTTCCAAATGCCCAGGAGCCCCACTTGGGAAATCGGAACAGGGGAAATAGCCAGCAGAGGCACAGCCCTGAAGATTCTGGAACTGATGCAGCTTGTGTACATTACTGTGACATGACTGGAAATGGAGCTTCCCACAACAC	CTGAGGAGAGATCAGAACACAAGTGAGGTTTTGGAGCCACTGTGTTTTGTTCTTTCACACATTACAGCATTAAAAAATGGAAAATAATGTTCGCTTTATACCATTTAATCATTAACCGAACAAATAGAACAGCATCCAGCTAAGACAACAGCATCCAGCTAAGACCAGGGACAATCTTAATAGAGGTCTGCAGGAAGGCAACTAAAGAAACATACAACTAAAATTAACACTATGTTTGTCAGAATCTTAAGACAG
ENSMUSG00000064373	Sepp1	E010	0.035952	14.8974			recognized	342	AGTAGAGGGTGGAAGCCTGAAGGTGGATGAGGGGCTTTTTTTTTTTTTTTTTTTTTTTTTGACAGGGTTTCTCTGTGTAGCCCTGGCTGTCCTGGAACTCACTCTGTAGACCAGGCTGGCCTCGAACTCAGAAATCCTCCTGTCTCTGCCTCCCAAGTGCTGGGATTATAGGCATGTGCCACCACAGCCCAGCGGATGAGGGGCTTTAAAATGCTGGTCTGTTTTTGTTGTGGTCTTTGTTGTTCAAGGGGAGAG	TTAATGATGGGAAACTCTGCAAGTGGAAACTCATCTTCTCCAGCTTTTCCTTTGTCCCTCGATCATTCTTTTCATTAGAAAC	GTGGGTGAAATAGTCTTCTCATTTATGTCTGCCATTTAGCCATTTGAAAATATTTGCCTTATGGCAGAGTATCAAGGGCCGTGTCTTCATGCTGCAGTTCTATAAAGACTGAATTTAGTTTAGTGTTTTGAGGTGTGTGTGTGTGTGTGTGTGTGTGTGTGTGTGTGTGTTAGCGATTGATCCCAGAGCCTCACATGAATTTAGTTTAGGAAAGAAGTACCAGCTAGATTTTCTATTAAGACGCTGAATAGCTTG
ENSMUSG00000057133	Chd6	E001	0.0361419	-0.0956033					GGCTGGGCCAGTATCCTGCTTCATCTTAACCGAGGCCCACTCCTTTCCCTCCAGCCTCACTGATCATCATGTCTAATCCTGGAGCCAAGGAGCTGTGTTTTTCCCATACACAGGATAACAAAGTTCTTAAGAGAATACCAGGCATTCTTGTACCTTATGGGACACACTACCCACAACAGCCTCGTTCTTTAAGGAACTCTAGGTCCTAGTAAGATATGCAGTATGGGTTTAAAGAAGTGCCTTTAGGAAGAAGCT	CCAGGATCAAGACCACAGACAATTTATTATGTGAAACATGGGTGAAGATGACCAAGAGAAGTTATGGCTATGAGTGACATGGAATTAGATGAAGAGGCTCAAGTTTGCTGAAGAGAGTTTAAATTTGGCTTTTGCTCTCGGAACGTTAAAATAATCATAAGAAGCACTTATGCCTTACAGAGCAAATAATCCACAGTGTCAATTTCATTTTGCAAACAGTATCACAACAGCAGTCAACAGAAGCCTGAACACCCG	CTGAAAAAGGACAAAGAAACATTGGATGCTGAAAGTCACCAGATGGCAAAGGGTGGCTACAGCTGTGTCCTGGCATAGCTTATCCCCCATTCCACACAGGGCTCGAGGTCAGAGTAGCTCCTGTGTCCTGGCCTAGAGGCGGTTGCTTCTTGGAAGCCAAAAGCATTTAGTGACAAGGGAGCAACCAGATGCCTGTACCTATCAAAAAGTGCTTCCAATACTGACTGGGAAGAGCAGTTTCCACTGTATGAGAAA
ENSMUSG00000029104	Htt	E039	0.0365953	0.556831					CTCCATCAGTCTTCCCCCAAGAAAACCGAATGATATCACCTATCTTTGAGTTGATTTTCACCTCTCTCAAGCCCTCTTAGAGAGTGTGCTGGGTAGTGAGTTTTCTGTAGCATTGCACACTCAATTGAATCCTCTTGTCTCTAGCACATGCTACTCCTAAACCCAATGGCCTTTCTAACTCTCATTTTGAAATGATCTGATTTTTTTGAACATGAAGTTGAATTGATGTATGGCTGAGTAGTACAGGGGAGATGA	ATGCTATTCATAATCACATTAGGTTATTTGAGCCTCTTGTTATAAAAGCATTGAAGCAGTACACCACGACAACATCTGTACAATTGCAGAAGCAGGTTTTGGATTTGCTGGCACAGCTGGTTCAGCTACGGGTCAATTACTGTCTACTGGATTCAGACCAG	GTTTGTCTCTCGGCCTTGTAGTCACTATACTTTCTCCTAACTGAATACAAATTACCCTGAAAAGACACCACCCAAGACTGGCCCGTACTCCAGTGGGGTTAGGCTTTAGAAATTTCCACAAGTTTTCTACATCTGTATACCCACTCATAACTTTATAATAAGCTGTCTTTAACTTGTAAGATAGAATTTTAGATTTATTCTGGTGGGCCAGGTCATTTATGCAAAATTCAGATTTCTGTAAAACAGGTGATCATC
ENSMUSG00000032966	Fkbp1a	E014	0.0366234	0.899547					GTCTTCCTGGGTTGGGGAGGGGGAGGGGGAGCTGACTGTGCCTTCATAGCTAGGCAGAGTGGTGTAGCCACAGCTGATATGAATCGGCTTCCCTCCCCCTCCTTCCCTTTCCCACCCTTTCCTTTGTCCCCCTCCCCATCCTTCCTCTGTTTCGTCTGCTTCTCCCTGCTCCCCTCCACTGTCACCACCCCCACCTTTTTTTTTTTTTCCTGCCTGATCTGGCCAAGCTGTTCTGGCTCAAGTTGCCTTTCTCTC	TAAGACCAATCAGCACCTTAGTTTGGGAGGGCTAATAGAGGAACAGTCATCCGTTTAGTCACCTCTGAAAGCAAGTTGAAAAAGGATGCTGTTGCTTTTTAAAAAACAAACATGTGTTTAAGGCAGTTTTAATAGAGTTCCTCATTTGTGACCCCCCCCCCACTGTGAGATTATTTTCGTTGCTGGTTCATAACTAACTAATTTTGCTATTGTTATGGATCATAGTGTAAATATCTGTTTTCAGTGGTCTTAGGC	TTAAAAAAATAAAAAATAAAAAAATCACCCCCCCTCCCAAACCAGATGACTATGGGACCCAGAACTCCTAATGCCTCTTCAAGTCTGTTCTCCATGCAGGCAGTGCCCACCCACACGTTCCCAGAATGACAGCAGGACCCTGGCACACAGTAGAACAAAAGCTTTCTTTTTTATTTCATTTTGATAAACTCCACAAAGACGCCTTAGTGAGAAGCCAGCTGTGCCTCACGATCACAGAATAGGCTGTTGTGAGGG
ENSMUSG00000001911	Nfix	E003	0.0369777	-0.0577751			recognized	133	TAGCTCTGGAAGGGTGACCGGCGACGCCAGGGATCCCCAGACTTTTAAGAAAAATCTCCCACAGGCTACTTGCAGTGGCTTTGCCAGTGTCCTCTTGCCAGGGCCGAGGCCAGAGAATCGACAAGGCCAAGTAGCCATGGGATCCCAGAGGTCCTGAGGGAGGTAGGGAAGGGTCTGGAAGCCTCCGCGCTTCTCATCGGCGCCCCCTGCTGGAGGCGGGAAGACCCTAGACAAGTGTGTGGGAGGACCTACCCC	TGAAAACCCAGAAAACAAAACAGACAGTAAACTACCCTTGTTTCTTATGTATCTCAGTGCAGAGACGGGGGAGGGGAATTGGAGGGCAGAGAAGGGAGACCAGGCTGAAAGAGGAGCAGAGGGAAGGGACGCTAAGGGGGAAGCACACCAAATCCATTAGTACTATATATATATAGAGATACTCGTATATACTGCGTTTCTTAGCCTAAGAAGAAACTTGTTTGACGGGACGGGCGGCCTTTGCGGTCCGCGATG	CTAGCGCAGGTGGAGGCTGCCTTGTCCTCCTCGCTCAGCTCCGGGGGCCCTTTCTGCTCCACTCTCAGCCGGCCCCTGGAGGGCTGTGTGCAGCAAGGGCAGGGGCAGGGCAGAGGGGCGGAGCAAGGGCACCTGCATGCAGGGCTGGGGTGCGGGGCGACCTGGGGCCGACTCCCTTCACTAGGGGCGTGGCAGAGGGCAGCAGCCCTTGCGTCCTGCGGGCGTGGAAGAAGGTGCCTATGCTGGGCTGGGCGT
ENSMUSG00000026924	Sec16a	E003	0.0369777	-0.25104					TTTATGTTTTCTACCTGCTGATTTTTAAATATTTAACTCTCTTTCCCTTCCTCTTTAGAGTGTAAGGATAGTTTTAGGAACAGTCAGTGAAGCCTTAAAGCTTTGACTCTTATGTGGTGGCAGCTCCTTGAAGTGATATGGGTGAGCCAGTGAGTCGCTGCTGAAGGTCCCTGGTGGGCTTTGGGGTAGAGATGCAAGGTTCCAGAGTGTGCGCTAGGACACCGTAAGCCACTCCAAGATACCACCAAGGCTTTA	GACATGCCCTTGTAACCACTTCCTCCCCAGCCTGGGAGCCGCTGCCATCTGGTGACCCTTTGAGGAGCTGGCATGTACTCCCCAGTTCACAGGACAAGGCACAGTTGCCCAGTGCAGTTTGAGGCTCCTCTTAGGCCAGACATCCCAGCAGTCAGTCCTCTCCAGGTAAGCAGACAGCCTTCTCAGTAGCCTAAGGATCCCTGGTTGGTTTGCACCATTTCTCAGGTGAGAAAGGCCTTGGTGTCCAAGTAACTG	TCATTCATATACATAGGCTGCAAGGAAGGAGACACACAGTATGACCGGCTCTGAGTTACTGCCATGTCCATCTGGGATCCACGAGACCTGAGGCAGCTAGTTGGTTCTTGGTGAAGAACAGTTATCTAATCATCTCAGGGTTCCAAATAAGAATCCAGCAGCAATCCTAGTTCAATGCCGCATATTTTCTTTGGCCAATCCTCCCTGGCCTTGAATTTCCCGAGGTGACAGAAGCCTAGAACAAAAGGAACAGCA
ENSMUSG00000022463	Srebf2	E019	0.0373572	-0.102672					AAGCCACTGTGCGCCTGATGGCAGGAGCCAGCCCTACCCGTACACACCAGCTGCTGGAGCATAGCCTACGGCGGCGCCCCACTCAGAACACCAAGCATGGTAAGTCCAGCAGCTGCCTGGCCAGAGGCCCGCTGTAGCCTTACACTTGGGGAGCAGAGAGGGTGGAGCCCAGGTATCGGACAGGGTGTTTCCACACACTGCGTGACTCTCTTAGCTGCTTAGTGAGGTGGGGACAAAAGGGAGGCAGCAAAACCT	AGAGGTAGACACCTGGCCTGGCCAACGAGAGCGAGCTACTGCCATCCTGCTGGCCTGCCGCCATCTTCCCCTCTCTTTCCTGTCTTCCCCGGGCCAGCGGGCAGTGCTGCTGGCTGAAGCTGCCCGCACCCTGGAGAAGGTGGGTGACCGCCGTTCCTGCAGTGACTGCCAGCAGATGATTGTCAAGCTGGGCGGTGGCACTGCCATCGCTGCCTCCTGACCACCGTCTGGGGCCTGGTCCACTTCTTTCCACCT	TAACACAAGGCTGTGTGAGTCTGTAGTATGACCATTACGCTGATTTAACCAGATGGCAGCATTTCTTGGCCAATACTGAGCTAGGGCCTTTGTGGGCAGCCTGATGGCTGCTTTCCGGTGGCCCTTTCTTGCCCACAGGTGTACCTGACACACTCTAGGGATGGGTGAGAGTCTGGGATAAAAGGGCTTTATCCAGATTCCAGCTCCTTGCCTGGCCATTCAGCTCTCTGACTGGCTGGTTGGTAGTAGTCGTTT
ENSMUSG00000022607	Ptk2	E025	0.0375306	0.550323					GCAAACAGGTGGGGACCGAGGTACCAGAAGGAAAGAGATGATTTTAGATATGAGCCCATAAATATATCAACGAACTTGGGTTGGAAGAAGACTTGGTTTGTATTAATCTATCTAACCAAAAAAATAAAATATTTATAATTTCAATGACCCAGGAACTACTGAGCCTGAACAAGACTAGTTATGGCTACTCTTGCATCTAGGAAGCCATTGTTTTCTCTGGGAAGATTATCTCAACAGGATAACTAGTACTTAGAG	CCAAGGGCACACTTGAAGCACTCTTTGTCAAATCTGTACACAGGAGAAAGAATCTCAAAGAATTTCAGGATGCTTTCTTCTCTATTAAGGTTGGCAAACTGCCTGAATGTTTGCTGGATCAGCTTTCTTAGTGTTTTGGC	CTGAATGAAATTTTAGAAAAATACGTTTTCAAGTCAACCAACAGGGGGAAAAAAAAAAAAAAAACCTGCATACTAAATACCATTTACATTACTACAAAAACTCACTCAGTCAGATAACTAGTAGAGCATTAACTGTTGTAAAATACACATTAACAAACTTTACCCTGAGACCAGTTTGAAAGGTATAATTAGCAACAGAGGGCTTTATTCAACTTCAACAGAAGTTTAAGGCAACAACATGCATATTAAACATAT
ENSMUSG00000009575	Cbx5	E001	0.0377237	-0.0576835					TGAAACAAGTCAAAGATGATACAGTCACAGGGTAACCACACTGGGCTTTGTAAGCCTCACACTTTGCTTGATGCTTTATTGGTGAAGAGCACCCGATGCTCCTTTATTTTCTGAACCATCTATCAAGAGCTGGAAGAGCAGGGAAACCAAGAAGGCAAATAAACCGACTCAGCTCAGGGACACAGTAGGCACCAGTGCTGGCTTATTCCCCAGGGTTGGCGCCACCCTGTGGTTGTTTGTAGAAAGTCGGAACCA	CCATATTTGAAAAGCAATCGTTTATTAGAACCAATACAAGAGTATGAAAAGAGGGAAAAGAGGAAAAAGAGGGTGGAAGGGGGAGAGGATGATGTCTGAATTGGATGTCAGTTGTAGAATGACATAATGTCTGTTTTTTTTTTTTCTCAAAACACTTACACTTAAAATGCAAACATACGTGTAGATAGATAGATAGACCACTTATCCTTTAAAGAAATCAAAAGCAGACAAGTTTGGCTGAAACAGAACCAAGAA	GTATGTCTGAAGACTGCTACAGATGAAAAAAAAAATTCTTTTCAACTTGTCTATACAGCAAGTTGAGGCTAGCCTGGTATCAGAGACTAAGTCTTTAGAACAACAATAAAATGGTGTATGGCGGGGAAGGGGCAGAAAAAGACATCAGTTCAGTGGCACAGCACTTGCCTGGCATGTCTAAGCTCAAGTCCCAGTACCACAAAATTAGTTTTGAAAGAGGATTAACACAGGAGAATATAGTCAAGTGTTTAGGAG
ENSMUSG00000021270	Hsp90aa1	E002	0.0377237	-0.158248					TGGATGGCACCACCTACAATGAGCTCATCAACTTATTAATGTCTTATAGGGCCGCCTACAACCCAATCTTTTTTTTGGTTTGGTTTCTCCTTATGGCCCTGGCTGGCCTAGAACTCAGAAATCCGCCTGCCGGGATTAAAGGCGTGCACCACCACCGCCCGGCTTTGGTTAGTGCTCTTTACCTGCCCCCTATAGTAAATACCCACTATTTTTCCTTATAGCCTCCAAGACAGGATTTCATGGAACTCAGGCTGG	TCTTTTTATCTCCTCTGTATTTATCTTTTAAAGCAGAATGTGATTGGGCACTGTTATTTCCATTCACAAGCCTTGCTGAGTTACAAGACCTAGGAAACTTAGGGTTGTTCTCGGGACTTTGGAAAACAAGCCACTTGGGGAATTCCTGTCAGGTTGTTTTAACTTGTGTTTACTTCTAAGACTAATACATGCAGAATTAACTACAGGAAATGAAAATTTTAAGATGTAATTTAAGCCATCTTAATTTGGTCTCCT	CTTGTTTTGGAAATAAATGTTACAGTTAATGTCCGCTAAGGGAGGCGGAGACTTGCTTTAGACATTAACACCCCATCCAATCCCCTGAAAGGAAACTTTATTCATAGGGGGCAAGCCAAGTATGTGCCTATAAACCCCAGCACTGGGACAGAGGCAGAACCAGCCCAAAGCCATCCTCAAACACAAAGGTCACTGTTCATTTCATTCAAACCCTTTAGCTGAGGCTTCCATAACAGCAATAATCCAATTGTTTCA
ENSMUSG00000030057	Cnbp	E014	0.0377237	0.563046					GGCGTGCGCGGGCTTCGTCACAGGCCAGGTCCTGAGGCCCCGCAGCCGCTGGCACATGGCCCGCCAGGCCTCCACCGGGCGCTCGGCCTGGGGACCTCCACCTCGACCAGGCTCTCGCCCCCGCCACACCGCCCCGTTCCAGGAGTTCCCGCCACACTGGCCCTCGGCGCTAGGCCCGCGCGCGACTCTCCTCGCCTCGGCCCCAAGGGCGCCGGGCCTCGTCGCCACACGGATGAGGCCTGCGTGGCCCTCGGG	TTCGGCGTCTGAGCTGCCCACAGCGGAGGAGACTCGGACGAAGAACCAAGAAGGCGACTCGCAAAGCAGCGGCTGTTTATTTTCAGGGTC	CTTGCCTGCGCCACACGCGGGTCTGCACACGGCCCCACACACGCCGCTGCGCACGGCTCTCCTCCGCCTCGCCCACGGATCCAATCAGCGCAGGAAGCCAGGCCAGCCAATCAGAATCGCCCGCTGGGAGCGCGGCCTCGCGCGAGGGCGGCAGGGGCGGGGCGGACTGCTCCACGCCCAGCCTCTTCCGGCCCGCAGCGCTCGCGGCCTTCCCGCCCGTACCTGGGTTCCGTGTCTACGATGAGTGGTTCGCTG
ENSMUSG00000026464+ENSMUSG00000094410	Zbed6	E002	0.0382566	-0.100634					TGAAAACTTGTAAACTAAAACTATCCCCATACTTTTGAGCAGAGCCAAGCTGCAACATCTGGTCCACTACCGTTAAGATGTGTATGAAAAATGTCCAACTTGATAGACTCTGGGGGAAAGACAGCTCAGGTTGGACAGAGGCCTCACATGGAGCAGGCAAGTGGGCCACTGCTAAGCTACAGCCTCAGTCTGGGGACTATTAGGCTACTATTAGGTAGAAACTTCTGTTCTCTGGCTGCTAACAATTAATGTGTT	TTGAACACAAATCATTGACTAATACAGGGCATTAAATATGAACAGACCTTTTTTTTTTTTTAAAGCAAAATAATAGAGGTTATATACAAAAGAGGCCTACAACCTATAGGCCAATTCAAAACAGGAGATGTGTTTATAAAATGTGTGGTGAAACCAGAACCTTCCACCTCTGCTTTGGAGAAGGGCTATCATACAACATTCAGTCAGCTGAAGATGGATCGGTACAAGCGTCTATACAGAAACTTCAAGTCATTT	CTGTAAGGGGAAGAAAGGCATACTGTTAGAGCAGGCGGTGGACTTCTTTCACGGTTAAATGACCACAGCCTTGGCAGTTTAGGAAAAGTGTTTCTGAACACACACAAGAACAGGCCCACTAATTTGGAATCACATTGTGAATTTAGCCAGTTATCTAAAGTATCTTTTCATTAGTAAAGGCAAACACCGCAGGGCGTGCGGCCCTCAGTTTGGAGTTAGAGGGGATAACCCGTAAATGTTCAGTGACTTATCAGC
ENSMUSG00000033411	Ctdspl2	E007	0.0382566	15.0569					TGACCTAGCAGAGATCCACATCTCAGCCCATAAATCCAGTTTTATTATGTGTGGTGAGACTGAACTCTTATCAAAGTGATCAACCCTCTCTTGTTACTCTCACATGGTTATTGGTTTTTAGAATTGTGTTTGTGAAATTCATCAAGTGATGGGTTTTCCTCTTAAGGTCAAAAGGACAAAACCCTTACCCCAGGGCTTACCTAGCTTGTGGTCTCAGATGTGATTAACTGCTCAATAAATATTTGTACAGTAAAT	TTTACATGTGG	CACCCGTAAAAGATGAAGCTGAGAACACGGAAGGCTTCTCAGCAGTCCAGTCCAATCCAGACACAGCGCACTGCCAGAGCAAAGAGGAAATACTCAGAGGTTGATGATAGCTTGCCTTCAGGAGGAGAAAAACCATCAAAGAATGAAACCGGCTTATTGTCTTCAATTAAAAAGTTCATTAAAGGAAGCACACCCAAGGTGATACTTTAACCTCACACCTATGTAAAACACATCATGCTTAGGTTGTTATATTAA
ENSMUSG00000083405+ENSMUSG00000034158	Gm15725,Lrrc58	E004	0.0382566	0.201652			recognized	148	GCGGTGTAGAATAAGGGCACTTTACACATCCTGTAGTCTCTTGACAGATACTGGCCCCCAAGTAACACAGAGAAAGTGTTCTGTCCTTTCTCAGCTGGCTCCTTTCAGATACATTGTCTTGCCTTTTTTCTTGTTTTCTAAAACATGATTAAGAGTATGGATGAATTATGTCACAGTGAACAAAGAAAGATTTCGAAAGTCCATCCTTTCCTCCTCCCCTCATAGATTCTAGGGACCAACTCCATTTGTCAGGCT	AGTCTATTTTGACTGTTGTGTCAGACAAATTAAGTTTGTGGACTTCTGTGGGAAGTACCGTCTCCCCCTCATGCACTATCTGTGCTCTCCAGAGTGCTCCTCCCCCTGCAGCTCTGCCTCCCATAGCTCCACCTCCCAGAGTGAATCTGACTCAGAAGATGAAGCCAGTGTTGCTGCACACAGAATGCAGAAAGTCCTTCTTGGTTGAGCAGCAATGGGTATTGAAAAATATTAAAACACTGAACAGAAATGACT	CCATGGATGACGATGCCGCTGCGCTCGTTGTCGACAACGGCTCCGGCTTCGCAGGCGACAATGCTCCCCTCCCCGGGCCGTCTTCCCCTCCATCGTGGGCTGCCCTAGGCACCAGGGTGTGATGGTGGGTATGGGTCAGAAGGACTCCTGCATGGGCGACGAGGCCCAGAGCAAGAGAGGCATCCTGACCCTGAAGTACCCCATTGACCATGGCATTGTCACCAACTGGAACGACATGGAGAAGATCTGGCACCA
ENSMUSG00000027692	Tnik	E045	0.0386028	-0.495339					TGGAATGGAGATGCTTGTCTGCTATGAGGATGAAGGGGTGTACGTGAACACCTACGGCCGGATCACTAAGGATGTGGTGCTCCAATGGGGAGAAATGCCCACATCTGTGGGTAGGTTAACCATTCCTTATCTCCTTCAGCAGTTACACGCCCCAAATGAAACGAAGGGCAAGAAATGGGAAACAACCATTTGAGTTCACCAAAAAAAAAAAAAAAAGTCTGTGACTGACACTTGTAAGACTCTCTTTGTCTGTTT	TAAATCCGTTTCAACTTTGCTTTAGTGTTTGCATTTTAAGAGACCACCAGGTACCTGTGAAACCTTCATTTTCCTTTATACTGACTCAAGTCACATCTGTGTTCAATGATCAATGACAATGAAGTGGCATTACTTGGTTTGATTCATGTGAACATTCAGAATCTATGACTCATGCATCCAAACCAGCATAAAACATCTCTTACTTTCTTGTAAACTCTTG	GTGACTTTTGTGGCCTGAGGGCCTTCCAGTGACTTGACAACCATTGTAGACTCTCCTATGCACTTAGAGCAGCTAGCCCATCATTGGTCACCTCATAGTGGGTTAGCCTTATGCCTTCACTTTTAGGCCTTTCACAGAGACAGTGTTGGGACCTAGCTTTCATATTATATTCACCTTTAAGTGTAGAAAATATGACATGTAGAAATATGAGCTTCTAAACAATGTCACTCATTCCTAAGAAACATAGTCACAAAC
ENSMUSG00000020719+ENSMUSG00000093273+ENSMUSG00000093133	Ddx5,Mir3064,Gm25994	E019	0.0386473	0.792083					TGCAAAGCATGGGACAGATGAAATACCACGGCAGTGAACTGTGAGGTAACTTCCATTTTTTTCCCCCGGAGAGAACAGTTTATGGGGCAGAGGTGGTATGTTCTGCCCTTTGAAGATTACTGGCACACTTTCAGCTTTTCACCTCTCTAATCGACTGGAAGCAGCCAGCCGATCACTAGTCCTCCATCCCCCTCGAGTCCTCCGATTGTCATGCCTAGGCCTTGCCACAAAGACTGCACCTTTATGTGAAAAAAA	ATTTAGAACCCAGTCACGTTCCTGCTGACTCTTGTCACCATGGATGCCCATGGCAGGCCAC	CTATACCAAGAATTAAATTATCAGTAGTATACCCAACTTAAAACTCTTGTCAAGACTCTACCAATATCTATTCCCACTGTACTTCATCTTGGCCAAGTGTTTTCCCACTAAGCATTGCAACCCAGAGCCTACTACAAGTCACTGGAACGAATCCATACAATTACCCCTATATCACAGCGCATGATTCCCAAAAAACACTAGCCCCAGATCAAAGTACTTTTAAGTCTGCTTTGACTCAGGAAACCACATACCCAT
ENSMUSG00000022201	Zfr	E009	0.0386473	0.290076					TAGTGAAATGCTATGTGTAAACATGAAGATTTATCATATATTTCACTATAAGTTGTATAAGGTCTTTTTGTTGAGTTTTTTTAATGTATAGAATAAAATAATGAACTTTATATGTAAAAATGCTTTTTTAAACTCCTAATTTGGTTCAAGTTTTTTACTTCCTAGTGCCTCATCTTTGATACTCTTGCTTTGCAGTGTGATTCATAATCTGAAATATAATATATTTGAATATACATTGTGATTAAGGAATGAAAA	CAGCAGCCAGCTTCGGGTGTAGCCTATTCCCATCCAACTACAGTTGCTAGCTACACTGTCCATCAGGCTCCAGTAGCTGCTCACACAGTTACTGCTGCTTACGCACCAGCAGCCGCCACAGTTGCAGTTGCCAGGCCTGCTCCAGTTGCTGTTGCAGCTGCTGCAACAGCTGCTGCATATGGAGGCTACCCCACTGCACACACAGCAACCGACTATGGTTACACCCAGAGGCAACAAGAAGCACCACCACCACCA	GTAAAAACCAAAACCAAAACCGCTGAGTTCAGTAGCCTTAACACATGCATCTAATGGGTTCGGTATGATAGAAGGCCAAAGCCAGTACTTGTAAATGTACTTGCAGTGATGGAGAAAATTTCTTTGCAGTGAATTTTATATAAGTTCTCCTTTGCTAGTTTTACCCTACTATACACATTTATATGTGTTTGTTTAGTTTTTTAAAAAGTTTTACACAAATCATAGATAAAATACTTTCATTTTACCCTGTTTTTG
ENSMUSG00000029657	Hsph1	E002	0.0386473	-0.160935					CCAGTGTACATAACCCCACCACCAACCCTGCATCTACCAACTTGTGATGCAGGCAGGGGATTTTCCAGAGCTAGTGCTATGTTAATTGTATTTAATCTTCCAAAATGGATCTTTTTAAGTGCTGACCCTCAGGCACTTTTGTTACAGCTACCAAAATCAGCCAGTGGTAGGAAATCTCCAGGCTGGTGTCAGTGCACATTAGATGTTAAGCTTCTCAATGCCCAAAGACTACAGCTAAGCCAATCGGCATGTTTT	GACACAAATATTTTAAATTGACTTCAGAACAGAATTCACCAAAGCTCTCAATTTGTAATACTGGACAACACTTACAGGTTAACTTCTGGTTTTTGGCTGTAGGGCACTATAGTCTAGAACACTAGCAGACCCACCCAAAAAGCCAGTCACCAGAGGACAAGGACCAGGATGGCGATAGGTCCCAGCAGGGCTTTTCCAGGGTGGGACTTTGTGCTCAGGTTTGTCAATGTGGAGAGCAGGCACTATTCTCTACGA	TTGGCAAGAATAACTGCTTAAGATTCTGATCCCAGCGTGTGACCAAGCAGTGTAGTTCATATCCTCAGAAGACGACCCCACCTCCTCAGTGTATGAGCAGCAATACTGTACAGAGCTCAGTGTGGGGCACAACTCCACAGGACCCTGACACCAAAGTCATTCTCACTTAGGGTCAGAGACTACACAGATTCAAGCTTTTCCTTTTTTCCCCTCATAATACACAAAATTTCTAGACAGTCTTAAAAAAAAGAAAAT
ENSMUSG00000074968	Ano3	E010	0.0386473	1.84414					CCCAGGTAGACCTTTTGAGTTTGACAGCATTGTATACAGAGTCAGTTTATGAATAGCCAGGGATACACAGAGAAACCCTGTCTCAAACAAACAAACAAACAAACAAATAAACAAACATTAAGGAAAAGGAGGAAGGAAAGAAAGAAAGAAAGAAAGAAAGAAAGAAAGAAAGAAAGAAAGAAAGAAAGAAAGAAAGAAAGAAAGAAAAGAAAGAAAGAAAGGAAGGAAGGAAGAAAGAGTAAAAGGAAGGAAGGC	CAAAGTTTCTTCTGACCTTCAGATATAGGTCAAAGTATATTTGTGACCCCCATTCTCAACACAATCTCATATACATAAGGAAAAGGCAGCAAATAACTCAGAAGTCTAAGACAAAGGCTTTCCAAATAATGATTAATGTACATCAATTTCCAGGTGTACCTCTCTTTGGCTATTTGTAAACACGTGTATAACTGAAGAGAAAAAAATGGTAAAACACAGAAAATATATACAAGCTAATATGCACAGCATTATTTA	CTAAGTTAGTGAGGAGGTATGCAATTTTTTCATAAGCCTGCAAAAGAATATACAGATAAATTTTATTATTTTTTATTCTTTCAAAGAAGTGTCTAAAGTGGGGTGGATATATTTTTAGCAAGTAGAAATATTTATTAATATACTATGTAGTATTCTATACTTGTATATATACACAAAATGGCTGAACTATAAATGACTTTAGAAATACATGTGTATGTATTCATGTAGATACCTTATCATCTGCTCTTTGTTGCT
ENSMUSG00000022710	Usp7	E003	0.0387342	-0.173636					AAAAAGGCAATATACAGGAGAATTGGTGTACACTGCTGCTACAGAAACAAACAGAAGTACTGGGGGTGGGAAAGAAGTGTGGCTTGCTCCTTCTATCTGCACTCCAAACTAGACACGCAGCTGGCATTAGCTCCAACAAAAAGGGAAACAAGGAGAAGACTCAAATAAAGCTACGCAGAGTGTCCAAGTCGGCCAGGGTCACTCGCACTCACCCAATAGAAAACGGCCTCCTCCCAGGGCAAATTGTACAGGTTT	GACCCCTAACTGCCAGGACCGCACTCAGTGCATCCACTTCCACTTCGTGAACAGGCTGCTACAGTACTAGCTGACAAAGAGAGACGGTTATTAAAAAGCCTCCAGGCAGCTGAGGAGAGGAGCCCCAGGAAGGGCCAGCATCGGACATGGTGAGGAGAACACTATTGACTAGGGCTGTTTTCTCTGGTTTGCCTTTACAGATGCACACAGATCACTGAAAGTCTAACTGAAGGAAGAAATTGGACGAGCCTACTC	TCAGTTGTGGATTTTAATTGCCTTTTCTAGGTAAGTGTAGCGACTCCTCTTTGGGGCTTTGTTGAAGTGGTCAAGCCCTAGCCAAGGCCGAGGATGAGACATGTTACCTGGCAGGGACAAAGAACAAACCATTAAGACTCAGGCTCTCTGGTAACCACTAGAGTCACAAGTCCTCACATAGATGGCTGCTCAGTCAAGCCAGAGACCATTAGCCATTTGTTAAAGCCAGAGTCTCCCAGCCTCAGCCCCAACAGA
ENSMUSG00000046785	Epm2aip1	E004	0.0387451	-0.119771					GAAACCTTCACAGTCTTTTTTGACCGTCACGGACATTTTGCCTGTTCTCTGAATAGTTCTTAGCCATGTATTGCAAATTAAGAAATGAAATTCACCTTACTTGCGACTAGTAATCTCATTGTTGTGTTTCTTGAATTTAGTGCAGTGCTTAGCATGTGGTTCAAATATTATGTGAATGTTGTTAAGAAAACAGACTGTAATTTACCCTAGTAAACTAGTAGTAATGTCAAGATTCAAACCTAGGTGTACTCAAAA	TGATTTCTGGCTCTCCTGGAACTTAAAAGTAAGTAAACTTGTTTCTGAGAAAGATGTCTTAGTCAGCCCTTCTGACTACAAGATCTTCAGCTCATTTAAAAAAAAAAAAAATGTGGAATTCCCACATCATCTCCCAGAGAGAAAACCCCCAGATGACATCCAGTTAACATGGACTTTTAGATTTGCTGTATTTTCTTGCTTTCTTGTTTCATGCTTCTGAATTTCATTTCTAGGTAAATGAGACATTTCAGTCTT	AAAAGCCTTGTGTTTGTCTTTCAGTGACCATGTGTTACCCTTCCTTCTGGTGTATTCCTTGGCAGATAACCTTGCTTCGGTTATTTACTTTATATGGGTTATTTTCCACAAAGCAACCAGACTGAGCTCTACTTCACAGTCTCTCAGATAACACCACTTTCCTACTCAAAAACTTCCAGTGGTTTGGCTGTCAGATTAAAAGCTGAAGTCTGTCCGTTCCTACGTCTTTACTCACACATGCCTTCTTGGTGTCTC
ENSMUSG00000015222	Map2	E039	0.039305	0.104228	recognized	118			CTAATTTTTCATCAAGTACATAAAACTGAAATATTTGTATCATTATGTATTTATTGGCATTTCCCCTATGGCTTGCCAGTGAGAAAGTTTGCACTATTCAGGAAATATCCTTCATATACATATTCTAGTACCCTATTTATCTACTTCCTTAATGTAAATTAATTTCAACTTTTATTAATGAAATGAAGATGCTTCTTCATTTTCCAAGTAATTATGCACTATACACTGTTTAGAAGTGACTAAGATAAACAAAAA	TTTACTTACAGCCTCGAAGATGGAATTCCCTGAGCAGGAGAAATTTCCTTCCTCATTCGCTGAGCCTTTAGACAAGGGAGAAATGGAGTTTAAGATGCCAAGTAAGCCTGGTGAAGACTTTGAACATGCTGCCTTAGTTCCTGACACAAGTAAAACTCCTCAGGATAAAAAGGATCTCCAAGGCATGGAAGGAGAAAAGTTGCCTCCAGTTCCATTTGCGCAGACTTTCGGTACCAACCTGGAAGACAGAAAACA	ATGAAGAATGAGAGAGTCTCAGAAGGACCACGACCCTTTGCCCCTGTCTTCTTCCAATCAGATGACAAAGTGTCTCTGCAGGACCCCAGTGCTCTAGCTACTTCCAAAGAGAGTTCTAAAGATGAGGAGCCACTGAAAGATAAAGCAGACAAAGTGGCAGATGTTTCCATCTCAGAAGTTACCACTTTACTGGGAAATGTTCATAGTCCAGTTGTGGAAGGCTATGTTGGGGAGAACATTTCAGGAGAAGTAAAG
[truncated: 67 more rows]

## Sheet: Affected gene list
Homer1
Homer1
Map2
Nrxn1
Snap25
Hsph1
Bsn
Dnajb5
Map1b
Map1b
Prkcb
Prr14l
Pisd
Gm20671
Fat3
Scn2a1
Map2
Kif1b
Psd3
Dph1
Ovca2
Ppp1r9a
Ywhaq
Brwd1
Nrxn3
Slc1a2
Rheb
Nr1d1
Dmxl2
Usp34
Atp2b1
Prr14l
Pisd
Gm20671
Atp2b4
Btaf1
Rbfox3
Slc24a2
Apc
Adcy1
Unc80
Rheb
Myo9a
Hivep2
Btaf1
Ptprt
Kmt2a
Dock3
[truncated: 561 more rows]

[truncated: 4 more sheets: Affected genes with motif, Affected gene with motif list, GO analysis, GO summary]
